# Supplementary material for: Linguistic Phylogenies Support Back-Migration from Beringia to Asia
Source: PLoS One. 2014 Mar 12;9(3):e91722. doi: 10.1371/journal.pone.0091722 (PMC3951421; doi:10.1371/journal.pone.0091722)
Supplement: File S2 — Sicoli-Holton-DY-Typological.nex. (NEX) [file pone.0091722.s002.nex]

#nexus

BEGIN data;
DIMENSIONS ntax=40 nchar=116;

FORMAT
	datatype=STANDARD
	missing=?
	gap=-
	interleave=no
;

MATRIX
hax   1010000000000000000000?0000101110101???01001000010000011110010111111000010100000001001000001000000?0001010?000111101
gwi   0000001100100000000111?1000101?01101???00100100000001110001010111110000000010010001001000001?0000000100?1010011?01??
dgr   0001001000000000000110?1000101?01101???00100100001001110001010111110000000010011001001000001?0100000100110100111011?
scsh  0000000000100000000110?1000101?00101???00000100001001110001010111110000000010010101001000001?0?00000100?1010011?01??
xsl   0000000000100000000110?1000101?01101???10000100000111110001010111110000001010010001001000001?0?00000100?1010011?01??
bea   0000000000100000000111?1000101?01101???0000010000000111000101011111000000010000000100100000110?00000100?101001110111
crx   0000000000100000000111?1000101?00101???000001000000011100010101111100000011100100010010000011010000010011010011?011?
chp   0000000000001000000111?1000101?01101???11010100000111111111110111110000000010010001001000001?010000010011010011?011?
txc   0000000000000001100001?1000101?10101???00100100001001110001010111110000000000000001001000001?0?00000100?1010011?01??
haa   0000000000000001100111?1000101?01111???10000100000111110001010111110000000010011001001000001?0?00000100?1010011?01??
ing   0000000100100000000001?1000101?01111???11000100000111110001010111110000100100000001001000001?0?00000100?1010011?01??
kuu   0000000000010100000001??000101?00111???0100010000000111000101011111000010000000000100???????????????????101?01??????
hoi   0000000000010100000001??000101?01101???1000010000011111010101011111000010010000000100???????????????????101?01??????
koy   0000000000010100000001?1000101?00101???11000100000110110001010111110000100000000001001000001?0000000100?1010011?01??
taa   0000000000010010000111?1000101?01111???100001000001111100010101111100001000000010010010000010000000010011010011?01??
aht   0000000110000000000100?0000101?11101???01000100000000110001011111110000000100000001001000001?0100000100?1010011?01??
tfn   0001001000000000000001?1000101?01101???01000100000000110101010111110000000000000001001000001?0?00000100?1010011?01??
kkz   0001010000000000000110?1000101?01101???10000100000111110001010111110000000010010001001000001?0?00000100?1010011?01??
tcb   0000000000010100000111?1000101?01101???10000100000111110001010111110000000000001001001????????????????????1?????????
tau   0000000000011000000111?1000101?01101???10000100000111110001010111110000000000000001001000001?0?00000100?1010011?01??
ttmN  0000000100100000000111?1000101?01101???10000100000111110001110111110000000010010001001000001?0?00000100?1010011?01??
tceS  0000000000010100000111?1000101?01101???100001000001111100011101111100000000100100?????????????????????????1?????????
eya   0000000000000001100101?1000101?01101???0100??0000000101011001011111000000000000000100100000?00000??000101000011?0???
tli   0000000000000001100011?1000101?01101???011100101000010111100110111101000000000000010010000010000011010011000011?1110
gce   0001001000000000000101?1000101?01101???0?10010000000110000001011010000000000000100100100000100000??010001000010?0110
tol   0000000100100000000101?1000101?01101???0?11010000000101100101011000000000000000000100100000?00000??010001000010?0110
cco   0000000000010100000001?1000101?01101???0101010000010111100101011110000000000000000100100000?00000??010001000010?0110
hup   0000010000000000000000?0000101?01101???01001000000001011000010111100000000100000001001001001100001101000100001110110
mtl   0000000000100000000001?1000101?01101???001010000000010110010101101000000001000000010010000011010000001001000011?0110
wlk   0000000000100000000000?0000101?01101???0100100000000100000100011000000000010000000100100000110000000?0001000011?0110
kto   0000000000100000000000?0000101?01101???01100100000001100001010110100000000100000001001000001100000001000100001110110
apc   0000001000000000000110?0000101?01101???00000100000001110001010111110000000000000001001000000001000001000100001010110
apw   0000001000000000000110?0000101?01101???00000100000001110001010111110000000000000001001000000001000001000100001010110
apj   0000001000000000000110?0000101?00101???00000100000001110001010111110000000000000001001000000001000001000100001010110
nav   0000001000000000000110?0000101?01101???00100100000001111001111111110000000000000101001000000001000001000100001010110
apk   0001001000000000000110?0000101?00101???00000100000001110001010111110000000000000001001000001001000001000100001110110
apl   0001001000000000000110?0000101?00101???00000100000001110001010111110000000000000001001000001001000001000100001110110
srs   0001100000000000000010?0000101?01101???000001000000011100010101111100000000000000010010000010000000000001000010?0?00
ket   00000000000000010100111101000011110001101001000000001000000010010000000000100000001000000111100000001011100001100000
zko   00000000000000010000110100000011110111101001000001001010100010100000010001110010001100000111100000001011111001000000

;
END; 
