# Supplementary material for: Linguistic Phylogenies Support Back-Migration from Beringia to Asia
Source: PubMed Central journal article supplement (PMC3951421; doi:10.1371/journal.pone.0091722), 2014-03-12
Supplement: pone.0091722.s001.pdf [file pone.0091722.s001.pdf]

This 116 character set is modified from features described in Sherzer (1976) *An areal-typological study of American Indian languages north of Mexico*. Amsterdam: North Holland Publishing Company.

## PHONOLOGY

### VOWELS

1. Three Vowel
2. 1-1-1
3. 2-1
4. Four Vowel
5. 2-2
6. 2-1-1
7. 1-2-1
8. Five Vowel
9. 3-2
10. 3-1-1
11. 2-2-1
12. Six Vowel
13. 2-2-2
14. 2-3-1
15. 3-2-1
16. Seven Vowel
17. 2-2-2-1
18. 3-3-1
19. Voiceless Vowel
20. Nasal Vowel
21. Pitch Phonemic
22. not a,e,i,o,u
23. vowel length contrast
24. mid or mid-high vowel

### STOPS

25. one stop series: voiceless
26. two stop series: voiceless/voiced
27. two stop series: voiceless/glottalized
28. three stop series:  
voiceless/voiced/glottalized
29. four stop series
30. glottalized stop series
31. labial stop present
32. labial order (not nasals)
33. dental order
34. k order
35. ʈ (retroflex order)
36. c/tʃ
37. k/č
38. k/q
39. either k/č or k/q
40. tθ
41. q
42. kw
43. qw

### FRICATIVES

44. one fricative series: voiceless
45. two fricative series: voiceless/voiced
46. two fricative series: voiceless/glottalized
47. three fricative series:  
voiceless/voiced/glottalized
48. glottalized fricatives
49. pharyngeal fricatives
50. labial fricative
51. θ
52. ð
53. s/ʃ
54. z
55. x
56. xw
57. x.
58. x.w
59. ɣ
60. ɣw
61. h
62. hw

### LATERALS

63. l
64. ɭ
65. tɭ
66. tɭ'
67. dl
68. l'
69. ɭ'
70. ly
71. tɭy

### NASALS

72. voiceless nasal
73. glottalized nasal
74. ɲ
75. ŋ

### RHOTICS

76. r
77. voiceless r
78. glottalized r
79. r/l

### SEMIVOWELS

80. voiceless semivowel
81. glottalized semivowel

## MORPHOLOGY

### NOMINAL MORPHOLOGY

82. nominal case
83. possessive pronoun prefix
84. possessive pronoun suffix
85. possessive pronouns independent morpheme
86. alienable/inalienable?
87. reduplication = distributive or plural
88. reduplication = diminutive
89. augmentative-diminutive consonant symbolism
90. masculine/feminine gender
91. animate/inanimate gender
92. plural in pronouns
93. plural in nouns
94. inclusive/exclusive plural in pronouns
95. dual in pronouns
96. dual in nouns
97. inclusive/exclusive dual in pronouns
98. demonstratives for visible/invisible objects

99. numerals classified by form or shape of object

100. locative prefixes
101. locative suffixes
102. locative prepositions
103. locative postpositions

### VERBAL MORPHOLOGY

104. nominal incorporation
105. subject person marker prefixes
106. subject person marker suffixes
107. subject person markers independent pronouns
108. reduplication in verb = distribution, repetition
109. reduplication in verb = diminutive
110. prefixes mark tense-aspect
111. suffixes mark tense-aspect
112. evidential or source of information marked
113. instrumental markers
114. locative-directional markers
115. locative-directional markers prefix
116. locative-directional markers suffix

## Dene-Yeniseian Taxa

|     | LAT       | LONG        | CODE | NAME              |
|-----|-----------|-------------|------|-------------------|
| 1.  | 53        | -132        | hax  | Haida             |
| 2.  | 66.5647   | -145.2739   | gwi  | Gwich'in          |
| 3.  | 62.7672   | -115.868    | dgr  | Dogrib            |
| 4.  | 66.2569   | -128.633    | scsh | Hare              |
| 5.  | 60.8171   | -115.784    | xsl  | Slave             |
| 6.  | 56.9499   | -119.515    | bea  | Beaver            |
| 7.  | 53.9171   | -122.75     | crx  | Carrier           |
| 8.  | 54.4641   | -110.183    | chp  | Dene Suline       |
| 9.  | 54.9944   | -129.954    | txc  | Tsetsaut          |
| 10. | 64.7881   | -141.2      | haa  | Han               |
| 11. | 62.6822   | -159.5619   | ing  | Deg Xinag         |
| 12. | 63.0133   | -154.375    | kuu  | Upper Kuskokwim   |
| 13. | 62.9036   | -160.0647   | hoi  | Holikachuk        |
| 14. | 64.8809   | -157.701    | koy  | Koyukon           |
| 15. | 65.1533   | -149.3369   | taa  | Tanana            |
| 16. | 62.2714   | -145.3822   | aht  | Ahtna             |
| 17. | 59.9719   | -154.8478   | tfn  | Dena'ina          |
| 18. | 60.0629   | -128.711    | kkz  | Kaska             |
| 19. | 63.3853   | -143.3464   | tcb  | Tanacross         |
| 20. | 62.9822   | -141.9517   | tau  | Upper Tanana      |
| 21. | 62.8303   | -136.582    | ttm  | N Tutchone        |
| 22. | 61.6097   | -137.499    | tce  | S Tutchone        |
| 23. | 60.3      | -145        | eya  | Eyak              |
| 24. | 59        | -135        | tli  | Tlingit           |
| 25. | 42.25     | -123.16     | gce  | Galice            |
| 26. | 41.930156 | -124.141745 | tol  | Tolowa            |
| 27. | 42.4      | -124        | cco  | Chasta Costa      |
| 28. | 41.05     | -124.4      | hup  | Hupa              |
| 29. | 40.1      | -124.1      | mtl  | Mattole           |
| 30. | 40.64     | -122.307    | wlk  | Wailaki           |
| 31. | 39.4      | -124.4      | kto  | Kato              |
| 32. | 33.15     | -108        | apc  | Chiricahua Apache |
| 33. | 33.45     | -110        | apw  | Western Apache    |
| 34. | 36.35     | -104        | apj  | Jicarila          |
| 35. | 36.1      | -108        | nav  | Navajo            |
| 36. | 35.07     | -98.246     | apk  | Kiowa Apache      |
| 37. | 31.79     | -106.42     | apl  | Lipan Apache      |
| 38. | 51.045    | -114.0572   | srs  | Tsuuti'ina        |
| 39. | 64        | 87          | ket  | Ket               |
| 40. | 57        | 94          | zko  | Kott              |
