# Supplementary material for: Linguistic Phylogenies Support Back-Migration from Beringia to Asia
Source: PubMed Central journal article supplement (PMC3951421; doi:10.1371/journal.pone.0091722), 2014-03-12
Supplement: pone.0091722.s003.pdf [file pone.0091722.s003.pdf]

Sicoli-Holton: Linguistic phylogenies support back-migration from Beringia to Asia

MCMC Runs for Fig. 2 (with Haida Outgroup)

|                                         |    |
|-----------------------------------------|----|
| (2a) With Na-Dene Ingroup Constraint    | 2  |
| (2b) Without Na-Dene Ingroup Constraint | 40 |

MrBayes v3.2.1 x64

(Bayesian Analysis of Phylogeny)

Distributed under the GNU General Public License

Type "help" or "help <command>" for information  
on the commands that are available.

Type "about" for authorship and general  
information about the program.

MrBayes > exe /Users/msicoli/DY-Typological\_binary\_bayes-2.nex

Executing file "/Users/msicoli/DY-Typological\_binary\_bayes-2.nex"

UNIX line termination

Longest line length = 123

Parsing file

Expecting NEXUS formatted file

Reading data block

Allocated taxon set

Allocated matrix

Defining new matrix with 40 taxa and 116 characters

Data is Standard

Missing data coded as ?

Gaps coded as -

Data matrix is not interleaved

Taxon 1 -> hax

Taxon 2 -> gwi

Taxon 3 -> dgr

Taxon 4 -> scsh

Taxon 5 -> xsl

Taxon 6 -> bea

Taxon 7 -> crx

Taxon 8 -> chp

Taxon 9 -> txc

Taxon 10 -> haa

Taxon 11 -> ing

Taxon 12 -> kuu

Taxon 13 -> hoi

Taxon 14 -> koy

Taxon 15 -> taa

Taxon 16 -> aht

Taxon 17 -> tfn

Taxon 18 -> kkz

Taxon 19 -> tcb

Taxon 20 -> tau

Taxon 21 -> ttmN

Taxon 22 -> tceS

Taxon 23 -> eya

Taxon 24 -> tli

Taxon 25 -> gce

Taxon 26 -> tol

Taxon 27 -> cco

```
Taxon 28 -> hup
Taxon 29 -> mtl
Taxon 30 -> wlk
Taxon 31 -> kto
Taxon 32 -> apc
Taxon 33 -> apw
Taxon 34 -> apj
Taxon 35 -> nav
Taxon 36 -> apk
Taxon 37 -> apl
Taxon 38 -> srs
Taxon 39 -> ket
Taxon 40 -> zko
Successfully read matrix
Setting default partition (does not divide up characters)
Setting model defaults
Seed (for generating default start values) = 1388071270
Adding dummy characters (unobserved site patterns) for division 1
WARNING: There are 26 characters incompatible with the specified
        coding bias. These characters will be excluded.
Setting output file names to "/Users/msicoli/DY-Typological_binary_bayes-2.nex.run<i>.<pl
t>"
Exiting data block
Reached end of file
```

```
MrBayes > lset nst=6 rates=gamma
```

```
Setting Rates to Gamma
Successfully set likelihood model parameters
Adding dummy characters (unobserved site patterns) for division 1
WARNING: There are 26 characters incompatible with the specified
        coding bias. These characters will be excluded.
```

```
MrBayes > prset brlenspr=clock:uniform
```

```
Setting Brlenspr to Clock:Uniform
Successfully set prior model parameters
Adding dummy characters (unobserved site patterns) for division 1
WARNING: There are 26 characters incompatible with the specified
        coding bias. These characters will be excluded.
```

```
MrBayes > outgroup 1
```

```
Setting outgroup to taxon "hax"
```

```
MrBayes > constraint ingroup = 2-38
```

```
Defining constraint called 'ingroup'
```

```
MrBayes > prset topologypr = constraints(ingroup)
```

```
Setting Topologypr to Constraints
Successfully set prior model parameters
Adding dummy characters (unobserved site patterns) for division 1
WARNING: There are 26 characters incompatible with the specified
        coding bias. These characters will be excluded.
```

```
MrBayes > mcmc ngen=2000000 printfreq=10000 samplefreq=500 nruns=1 nchains=4 savebrlens=yes
```

filename=DY-26Dec-strict-Hout-Ynotin

Setting number of generations to 2000000  
Setting print frequency to 10000  
Setting sample frequency to 500  
Setting number of runs to 1  
Setting number of chains to 4  
Setting chain output file names to "DY-26Dec-strict-Hout-Ynotin.<p/t>"  
Successfully set chain parameters

MrBayes > mcmc

Running Markov chain  
MCMC stamp = 5611881771  
Seed = 1248079053  
Swapseed = 1388071270  
Model settings:

Data not partitioned --  
Datatype = Standard  
Coding = Variable  
# States = Variable, up to 10  
State frequencies are fixed to be equal  
Rates = Gamma  
Gamma shape parameter is uniformly distributed on the interval (0.00,200.00).  
Gamma distribution is approximated using 4 categories.  
Likelihood summarized over all rate categories in each generation.

Active parameters:

Parameters  
-----  
Statefreq 1  
Shape 2  
Ratemultiplier 3  
Topology 4  
Brlens 5  
Clockrate 6  
-----

1 -- Parameter = Alpha\_symdir  
Type = Symmetric dirichlet/beta distribution alpha\_i parameter  
Prior = Symmetric dirichlet with fixed(-1.00) variance parameter

2 -- Parameter = Alpha  
Type = Shape of scaled gamma distribution of site rates  
Prior = Uniform(0.00,200.00)

3 -- Parameter = Ratemultiplier  
Type = Partition-specific rate multiplier  
Prior = Fixed(1.0)

4 -- Parameter = Tau  
Type = Topology  
Prior = Prior on topologies obeys constraints  
Subparam. = V

```

5 -- Parameter = V
   Type       = Branch lengths
   Prior      = Clock:Uniform
               Tree age has an Exponential(1.000) distribution
               Node ages are not constrained

6 -- Parameter = Clockrate
   Type       = Base rate of clock
   Prior      = Fixed(1.000000)
               The clock rate is constant (strict clock)

```

Number of taxa = 40  
Number of characters = 116

The MCMC sampler will use the following moves:

```

With prob. Chain will use move
 2.38 % Multiplier(Alpha)
11.90 % ExtSprClock(Tau,V)
23.81 % NNIClock(Tau,V)
11.90 % ParsSPRClock(Tau,V)
47.62 % NodesliderClock(V)
 2.38 % TreeStretch(V)

```

Division 1 has 81 unique site patterns  
Initializing conditional likelihoods  
Using standard non-SSE likelihood calculator for division 1 (single-precision)

Initial log likelihoods and log prior probs:

```

Chain 1 -- -1621.647120 -- -93.249778
Chain 2 -- -1592.249470 -- -93.249778
Chain 3 -- -1633.133426 -- -93.249778
Chain 4 -- -1575.340102 -- -93.249778

```

Chain results (2000000 generations requested):

```

 0 -- [-1621.647] (-1592.249) (-1633.133) (-1575.340)
10000 -- (-1028.739) (-1036.015) (-1042.466) [-1020.536] -- 0:19:54
20000 -- (-1045.088) (-1012.996) (-1046.210) [-1000.570] -- 0:19:48
30000 -- (-1020.521) (-1002.542) (-1016.358) [-1003.863] -- 0:19:42
40000 -- (-1023.325) (-1013.502) [-995.452] (-1014.276) -- 0:19:36
50000 -- (-1017.019) (-1015.170) [-990.457] (-1020.263) -- 0:19:30
60000 -- (-1025.688) [-1001.691] (-1020.365) (-1017.846) -- 0:19:24
70000 -- (-1010.197) [-1009.446] (-1003.460) (-1016.008) -- 0:18:50
80000 -- [-1011.420] (-1014.188) (-1019.493) (-1014.499) -- 0:18:48
90000 -- (-1006.714) [-1003.648] (-1019.475) (-1006.100) -- 0:18:44
100000 -- (-1011.789) (-1015.559) (-1016.683) [-1009.579] -- 0:18:41
110000 -- [-1005.796] (-1017.809) (-1024.687) (-1014.136) -- 0:18:36
120000 -- (-1016.930) (-1007.096) (-1021.067) [-1004.768] -- 0:18:32
130000 -- [-1023.588] (-1027.211) (-1019.895) (-1012.184) -- 0:18:27
140000 -- (-1005.673) (-1010.089) (-1015.651) [-1009.047] -- 0:18:22
150000 -- (-1020.893) (-1006.895) [-991.682] (-1033.428) -- 0:18:05
160000 -- (-1015.701) (-1011.841) [-1013.735] (-1002.196) -- 0:18:01
170000 -- (-1017.437) (-1044.298) (-1005.647) [-1009.599] -- 0:17:56
180000 -- (-1021.359) (-1002.082) (-1016.087) [-1002.729] -- 0:17:51
190000 -- (-1022.265) (-1009.941) (-1010.601) [-1000.119] -- 0:17:46
200000 -- (-1029.121) (-1027.367) [-1003.992] (-1021.071) -- 0:17:33

```

210000 -- (-1008.409) (-1009.661) (-1018.253) [-1014.320] -- 0:17:45  
220000 -- (-1023.948) [-995.109] (-1022.535) (-1010.661) -- 0:17:39  
230000 -- (-1003.654) (-1010.333) [-1003.976] (-1012.312) -- 0:17:34  
240000 -- (-1006.234) (-997.865) (-1017.299) [-1008.493] -- 0:17:28  
250000 -- (-1011.312) (-1016.119) [-1026.958] (-1017.007) -- 0:17:23  
260000 -- (-999.963) (-1027.636) (-1015.583) [-1006.645] -- 0:17:17  
270000 -- (-1025.851) [-1004.928] (-1026.834) (-1000.745) -- 0:17:05  
280000 -- (-1025.845) (-996.241) (-1013.331) [-1014.689] -- 0:16:59  
290000 -- (-1009.085) [-1011.515] (-1017.801) (-1007.360) -- 0:16:54  
300000 -- (-1011.249) (-1016.287) [-1004.812] (-1029.991) -- 0:16:43  
310000 -- (-1015.481) (-1007.481) [-1007.868] (-1019.198) -- 0:16:37  
320000 -- (-1012.726) (-1016.447) [-1016.620] (-1015.538) -- 0:16:32  
330000 -- (-1011.591) (-1014.093) (-1024.598) [-1027.289] -- 0:16:26  
340000 -- (-1007.399) (-1009.124) (-1004.371) [-1003.718] -- 0:16:21  
350000 -- (-1005.471) (-1005.793) [-998.373] (-1033.099) -- 0:16:11  
360000 -- (-1026.010) [-1004.184] (-1015.620) (-1005.896) -- 0:16:05  
370000 -- (-1024.046) (-1019.174) [-996.148] (-1011.345) -- 0:16:00  
380000 -- [-1009.413] (-1008.610) (-1006.646) (-1013.255) -- 0:15:54  
390000 -- [-1011.596] (-1013.265) (-1016.090) (-1029.346) -- 0:15:45  
400000 -- [-1005.069] (-1007.953) (-1022.807) (-1017.452) -- 0:15:44  
410000 -- (-1022.164) (-1002.936) (-1019.030) [-1004.159] -- 0:15:38  
420000 -- (-1017.577) (-1009.683) (-1018.047) [-1006.836] -- 0:15:32  
430000 -- (-1014.977) (-1014.136) [-1007.215] (-1002.965) -- 0:15:23  
440000 -- [-1001.969] (-1005.414) (-1002.851) (-1020.846) -- 0:15:18  
450000 -- [-1010.898] (-1024.177) (-1013.844) (-1004.979) -- 0:15:12  
460000 -- [-1007.375] (-1024.528) (-1013.980) (-1010.060) -- 0:15:07  
470000 -- (-1016.171) [-1021.828] (-1029.044) (-1009.960) -- 0:15:01  
480000 -- (-1027.665) (-1025.530) (-1005.897) [-1011.579] -- 0:14:53  
490000 -- (-1042.298) (-1013.445) [-993.752] (-1022.066) -- 0:14:47  
500000 -- [-1006.274] (-1006.998) (-1020.058) (-1012.929) -- 0:14:42  
510000 -- (-1013.059) (-1020.123) [-1018.778] (-1033.993) -- 0:14:39  
520000 -- [-1005.962] (-1015.984) (-1013.603) (-1010.642) -- 0:14:33  
530000 -- (-1033.233) (-1008.576) [-1018.045] (-1023.188) -- 0:14:28  
540000 -- [-1005.473] (-1022.940) (-1019.235) (-1020.007) -- 0:14:22  
550000 -- (-1024.444) (-1005.461) [-1003.346] (-1019.444) -- 0:14:16  
560000 -- (-1013.884) (-1027.105) [-1002.710] (-1017.864) -- 0:14:08  
570000 -- [-1004.944] (-1005.922) (-1003.306) (-1025.436) -- 0:14:02  
580000 -- (-1011.828) (-1003.024) [-1004.551] (-1024.916) -- 0:13:57  
590000 -- (-1008.870) [-1008.526] (-1014.506) (-1016.521) -- 0:13:51  
600000 -- [-1006.229] (-1004.051) (-1014.935) (-1022.570) -- 0:13:46  
610000 -- (-1009.967) (-1008.053) [-1002.212] (-1009.617) -- 0:13:40  
620000 -- [-1014.093] (-1006.169) (-1011.886) (-1009.182) -- 0:13:34  
630000 -- [-1006.522] (-1032.301) (-1025.145) (-1017.590) -- 0:13:28  
640000 -- (-1011.318) (-1015.783) (-1010.288) [-1014.531] -- 0:13:23  
650000 -- (-1020.133) [-1009.421] (-1021.844) (-1011.591) -- 0:13:17  
660000 -- [-1005.344] (-1020.831) (-1028.511) (-1029.863) -- 0:13:09  
670000 -- (-996.378) (-1021.608) (-1008.217) [-993.651] -- 0:13:04  
680000 -- (-1018.575) (-1032.091) (-1015.942) [-1019.182] -- 0:12:58  
690000 -- [-1008.255] (-1012.471) (-1031.978) (-1026.745) -- 0:12:54  
700000 -- [-1003.531] (-999.518) (-1007.559) (-1003.923) -- 0:12:48  
710000 -- (-1012.906) [-1004.163] (-1034.484) (-1008.115) -- 0:12:43  
720000 -- [-1014.379] (-1010.820) (-1032.175) (-1016.982) -- 0:12:37  
730000 -- (-1013.607) (-1007.597) (-1018.865) [-1014.726] -- 0:12:31  
740000 -- (-1016.461) [-1011.403] (-1007.873) (-1000.126) -- 0:12:25  
750000 -- [-1003.508] (-1008.402) (-1021.492) (-1031.679) -- 0:12:20  
760000 -- (-1008.858) [-1005.331] (-1009.687) (-1014.012) -- 0:12:12  
770000 -- (-1024.606) (-1008.203) (-1004.744) [-1011.825] -- 0:12:06  
780000 -- [-1004.854] (-1020.586) (-1011.578) (-1005.325) -- 0:12:01

790000 -- (-1017.457) (-1018.735) (-1007.303) [-998.554] -- 0:11:55  
800000 -- (-1009.723) (-1021.077) [-998.028] (-997.442) -- 0:11:49  
810000 -- (-1003.867) (-1008.095) (-1011.783) [-1013.459] -- 0:11:46  
820000 -- (-1035.514) [-1010.655] (-1010.580) (-1001.138) -- 0:11:39  
830000 -- [-997.851] (-1002.037) (-1018.289) (-1008.216) -- 0:11:33  
840000 -- (-1006.676) (-1010.737) (-1010.589) [-1010.792] -- 0:11:27  
850000 -- (-1018.364) (-1008.317) (-1014.378) [-1001.501] -- 0:11:21  
860000 -- (-1021.436) [-1010.950] (-1005.742) (-1037.870) -- 0:11:16  
870000 -- (-1001.760) (-1013.312) (-1029.281) [-1001.023] -- 0:11:10  
880000 -- (-1006.871) (-1007.812) [-1015.737] (-1009.957) -- 0:11:04  
890000 -- (-1008.353) (-1019.206) (-1031.399) [-1001.545] -- 0:10:58  
900000 -- (-1012.013) [-1004.281] (-1016.681) (-1021.461) -- 0:10:51  
910000 -- [-1005.411] (-1008.072) (-1008.114) (-1012.823) -- 0:10:45  
920000 -- (-1021.312) (-1014.828) [-1002.497] (-1012.104) -- 0:10:39  
930000 -- (-1010.929) (-1023.528) (-1011.387) [-1009.112] -- 0:10:33  
940000 -- (-996.431) [-1003.137] (-1026.287) (-1014.202) -- 0:10:28  
950000 -- (-1024.055) [-1009.419] (-1020.389) (-1024.903) -- 0:10:22  
960000 -- (-1041.328) (-1010.456) (-1023.506) [-997.472] -- 0:10:15  
970000 -- (-1014.609) [-1001.060] (-1023.159) (-1024.159) -- 0:10:09  
980000 -- (-1011.301) (-1054.548) [-1012.624] (-1010.832) -- 0:10:03  
990000 -- [-1002.612] (-1014.374) (-1019.434) (-1002.944) -- 0:09:58  
1000000 -- (-1003.871) (-1015.941) [-995.716] (-1025.840) -- 0:09:52  
1010000 -- (-1002.151) [-1002.526] (-1014.542) (-1003.980) -- 0:09:46  
1020000 -- (-1005.365) (-1007.142) (-1014.304) [-1011.118] -- 0:09:40  
1030000 -- (-1018.665) (-1009.684) (-1015.946) [-1008.804] -- 0:09:34  
1040000 -- [-999.383] (-1021.723) (-1028.371) (-1007.834) -- 0:09:28  
1050000 -- (-1004.099) (-1024.959) (-1001.189) [-1007.905] -- 0:09:22  
1060000 -- [-988.730] (-1004.434) (-1015.640) (-1006.683) -- 0:09:16  
1070000 -- [-999.262] (-1004.973) (-1006.749) (-1005.523) -- 0:09:10  
1080000 -- (-1013.961) (-1020.744) [-1031.183] (-1010.001) -- 0:09:04  
1090000 -- (-1006.529) [-998.654] (-1007.874) (-1024.007) -- 0:08:58  
1100000 -- (-1024.376) (-1002.335) (-1029.549) [-1009.602] -- 0:08:52  
1110000 -- (-1012.109) (-1014.298) (-1019.636) [-1000.842] -- 0:08:46  
1120000 -- (-1009.900) (-1010.068) (-1014.760) [-1001.766] -- 0:08:40  
1130000 -- (-1017.094) (-1021.225) (-1004.484) [-1008.108] -- 0:08:35  
1140000 -- [-1006.385] (-1007.006) (-1005.314) (-1017.679) -- 0:08:29  
1150000 -- (-1003.342) [-1001.221] (-994.584) (-1025.503) -- 0:08:23  
1160000 -- [-1006.083] (-1003.030) (-1022.906) (-1013.355) -- 0:08:16  
1170000 -- (-1004.192) (-1015.177) [-999.339] (-1009.493) -- 0:08:10  
1180000 -- (-1020.845) (-1015.033) (-1018.270) [-1002.128] -- 0:08:05  
1190000 -- [-1003.126] (-1016.569) (-1002.137) (-1019.438) -- 0:07:59  
1200000 -- [-996.806] (-999.814) (-1002.764) (-1013.049) -- 0:07:53  
1210000 -- [-1001.722] (-1026.365) (-1016.175) (-1018.902) -- 0:07:47  
1220000 -- (-1015.995) [-1001.441] (-1009.432) (-1012.153) -- 0:07:41  
1230000 -- (-998.193) (-1006.988) (-1050.419) [-1010.159] -- 0:07:35  
1240000 -- (-1024.412) (-1008.028) [-1003.617] (-1023.794) -- 0:07:29  
1250000 -- (-1031.945) [-1006.180] (-1008.428) (-1006.075) -- 0:07:23  
1260000 -- (-1014.436) (-1011.536) [-994.617] (-1007.333) -- 0:07:17  
1270000 -- (-1016.975) (-1015.365) (-1025.255) [-1003.032] -- 0:07:11  
1280000 -- [-1002.847] (-1017.189) (-1022.756) (-1020.052) -- 0:07:05  
1290000 -- (-1011.274) (-1016.510) [-1013.226] (-1002.231) -- 0:06:59  
1300000 -- (-1020.554) [-1006.932] (-1010.887) (-1011.382) -- 0:06:54  
1310000 -- (-1017.449) [-1013.921] (-997.515) (-1032.533) -- 0:06:48  
1320000 -- (-1023.736) [-1013.262] (-1012.495) (-1017.343) -- 0:06:42  
1330000 -- [-1000.716] (-1001.966) (-1013.990) (-1009.810) -- 0:06:36  
1340000 -- [-1004.158] (-998.993) (-1026.247) (-1011.871) -- 0:06:30  
1350000 -- (-1012.705) (-1021.766) [-1011.275] (-1020.113) -- 0:06:24  
1360000 -- [-1010.105] (-1019.915) (-1025.295) (-1003.399) -- 0:06:18

1370000 -- [-1006.823] (-1009.164) (-1025.643) (-1000.132) -- 0:06:12  
1380000 -- (-1009.512) (-1009.387) [-1011.366] (-1001.077) -- 0:06:06  
1390000 -- [-1004.520] (-999.380) (-1004.833) (-1012.013) -- 0:06:00  
1400000 -- (-1017.817) (-1002.724) (-1025.263) [-1001.223] -- 0:05:54  
1410000 -- (-1007.228) (-1007.793) (-1012.588) [-1013.835] -- 0:05:48  
1420000 -- (-1014.598) [-1014.575] (-1027.825) (-1014.534) -- 0:05:43  
1430000 -- (-1024.554) (-1005.007) [-996.712] (-1008.030) -- 0:05:38  
1440000 -- [-1002.040] (-1017.625) (-1014.425) (-1021.520) -- 0:05:32  
1450000 -- (-1005.877) [-1006.654] (-1015.587) (-1006.798) -- 0:05:26  
1460000 -- (-1024.343) [-1002.998] (-1009.389) (-1039.435) -- 0:05:20  
1470000 -- (-1024.162) (-1004.402) (-1027.136) [-1015.784] -- 0:05:14  
1480000 -- [-1000.024] (-1007.262) (-1003.811) (-1022.153) -- 0:05:08  
1490000 -- (-1008.800) [-1001.139] (-1043.617) (-1029.495) -- 0:05:02  
1500000 -- [-1007.570] (-1023.487) (-1013.776) (-1017.848) -- 0:04:56  
1510000 -- (-1005.390) [-1015.025] (-1010.639) (-1016.422) -- 0:04:50  
1520000 -- (-1025.913) [-1002.642] (-1023.501) (-1001.147) -- 0:04:44  
1530000 -- (-1006.004) [-1001.935] (-1010.789) (-1010.275) -- 0:04:38  
1540000 -- (-1012.211) [-1003.551] (-1019.575) (-1010.811) -- 0:04:32  
1550000 -- (-999.041) [-995.241] (-1002.874) (-1014.930) -- 0:04:26  
1560000 -- [-1020.326] (-1024.716) (-1020.863) (-1011.956) -- 0:04:20  
1570000 -- (-1025.741) (-1008.577) (-1001.349) [-1002.617] -- 0:04:14  
1580000 -- (-1020.624) (-1013.267) [-997.932] (-1007.265) -- 0:04:09  
1590000 -- (-1004.218) (-1001.517) (-1013.014) [-1008.366] -- 0:04:02  
1600000 -- [-1009.095] (-1021.691) (-996.973) (-1007.550) -- 0:03:57  
1610000 -- (-999.023) [-994.537] (-1018.087) (-1013.087) -- 0:03:51  
1620000 -- [-1004.278] (-1016.845) (-1028.289) (-1026.997) -- 0:03:45  
1630000 -- (-1032.487) [-1001.177] (-1010.564) (-1018.761) -- 0:03:39  
1640000 -- [-1006.698] (-1000.865) (-1013.335) (-1005.854) -- 0:03:33  
1650000 -- [-996.261] (-1025.257) (-1013.089) (-1009.581) -- 0:03:27  
1660000 -- (-1020.400) (-1011.972) (-1015.072) [-1005.024] -- 0:03:21  
1670000 -- (-1017.090) [-1003.633] (-1019.213) (-1013.811) -- 0:03:15  
1680000 -- (-1019.155) (-1008.609) [-1004.857] (-1018.926) -- 0:03:09  
1690000 -- (-1025.212) [-1004.459] (-998.700) (-1012.996) -- 0:03:03  
1700000 -- (-1014.646) (-1015.331) [-1000.895] (-1011.521) -- 0:02:57  
1710000 -- (-1030.510) (-1028.287) (-1021.928) [-1001.915] -- 0:02:51  
1720000 -- [-1004.680] (-1017.617) (-1013.717) (-1015.702) -- 0:02:45  
1730000 -- [-1002.523] (-1028.054) (-1007.812) (-1009.944) -- 0:02:39  
1740000 -- (-998.520) [-1020.882] (-1003.923) (-1016.380) -- 0:02:34  
1750000 -- [-1015.786] (-1011.427) (-1003.391) (-1016.979) -- 0:02:28  
1760000 -- (-1017.366) (-1017.620) (-1024.564) [-996.259] -- 0:02:22  
1770000 -- (-1034.838) [-996.995] (-1016.746) (-1024.201) -- 0:02:16  
1780000 -- (-1013.279) (-1008.245) [-1011.540] (-1013.103) -- 0:02:10  
1790000 -- [-1002.172] (-1020.978) (-1030.276) (-1020.570) -- 0:02:04  
1800000 -- (-1014.146) (-1028.866) [-1004.756] (-1013.892) -- 0:01:58  
1810000 -- (-1007.502) [-1007.299] (-1012.769) (-1014.627) -- 0:01:52  
1820000 -- (-1030.790) (-1007.458) (-1013.781) [-1010.303] -- 0:01:46  
1830000 -- (-1014.613) (-1036.172) (-1006.008) [-1004.677] -- 0:01:40  
1840000 -- (-1009.741) (-1023.893) (-1016.996) [-1008.143] -- 0:01:34  
1850000 -- [-1009.368] (-1031.814) (-1024.418) (-1005.719) -- 0:01:28  
1860000 -- (-1029.335) (-1017.162) (-1022.860) [-1006.332] -- 0:01:22  
1870000 -- (-1017.730) [-1008.731] (-1005.959) (-1031.870) -- 0:01:16  
1880000 -- (-1005.006) [-995.934] (-1038.465) (-1014.510) -- 0:01:11  
1890000 -- [-1003.061] (-1006.095) (-1032.343) (-1037.317) -- 0:01:05  
1900000 -- (-1007.907) (-1004.618) (-1018.096) [-1009.068] -- 0:00:59  
1910000 -- (-1024.493) (-1011.079) (-1013.591) [-998.495] -- 0:00:53  
1920000 -- (-1017.997) [-1010.508] (-1012.281) (-1034.992) -- 0:00:47  
1930000 -- (-1014.825) (-1020.206) (-1011.872) [-996.885] -- 0:00:41  
1940000 -- (-1006.821) (-1011.509) (-1029.874) [-997.373] -- 0:00:35



```

1950000 -- (-1014.504) (-998.218) [-1008.689] (-1015.510) -- 0:00:29
1960000 -- [-1000.227] (-1024.644) (-1018.482) (-1002.619) -- 0:00:23
1970000 -- [-1009.259] (-1022.689) (-1020.227) (-1005.425) -- 0:00:17
1980000 -- (-1006.788) [-1005.542] (-1000.144) (-1030.185) -- 0:00:11
1990000 -- [-1009.699] (-1013.423) (-1016.056) (-1009.990) -- 0:00:05
2000000 -- (-999.693) [-999.653] (-1018.502) (-1022.327) -- 0:00:00

```

Continue with analysis? (yes/no): n

Analysis completed in 19 mins 45 seconds  
 Analysis used 1148.54 seconds of CPU time  
 Log likelihood of best state for "cold" chain was -983.67

Acceptance rates for the moves in the "cold" chain:

| With prob. | (last 100) | chain accepted proposals by move |
|------------|------------|----------------------------------|
| 34.5 %     | ( 31 %)    | Multiplier(Alpha)                |
| 18.6 %     | ( 17 %)    | ExtSprClock(Tau,V)               |
| 44.4 %     | ( 58 %)    | NNIClock(Tau,V)                  |
| 15.9 %     | ( 27 %)    | ParsSPRClock(Tau,V)              |
| 70.1 %     | ( 74 %)    | NodesliderClock(V)               |
| 71.1 %     | ( 31 %)    | TreeStretch(V)                   |

Chain swap information:

|   | 1      | 2      | 3      | 4    |
|---|--------|--------|--------|------|
| 1 |        | 0.46   | 0.20   | 0.07 |
| 2 | 333336 |        | 0.57   | 0.27 |
| 3 | 332812 | 332788 |        | 0.60 |
| 4 | 333315 | 334718 | 333031 |      |

Upper diagonal: Proportion of successful state exchanges between chains  
 Lower diagonal: Number of attempted state exchanges between chains

Chain information:

```

ID -- Heat
-----
1 -- 1.00 (cold chain)
2 -- 0.91
3 -- 0.83
4 -- 0.77

```

Heat = 1 / (1 + T \* (ID - 1))  
 (where T = 0.10 is the temperature and ID is the chain number)

MrBayes > sumt relburnin=yes

```

Using relative burnin (a fraction of samples discarded).
Summarizing trees in file "DY-26Dec-strict-Hout-Ynotin.t"
Using relative burnin ('relburnin=yes'), discarding the first 25 % of sampled trees
Writing statistics to files DY-26Dec-strict-Hout-Ynotin.<parts|tstat|vstat|tprobs|con>
Examining file ...
Found one tree block in file "DY-26Dec-strict-Hout-Ynotin.t" with 4001 trees in last block

```

Tree reading status:

```

0      10      20      30      40      50      60      70      80      90      100
V-----V-----V-----V-----V-----V-----V-----V-----V-----V-----V
*****

```

Read 4001 trees from last tree block (sampling 3001 of them)

General explanation:

In an unrooted tree, a taxon bipartition (split) is specified by removing a branch, thereby dividing the species into those to the left and those to the right of the branch. Here, taxa to one side of the removed branch are denoted '.' and those to the other side are denoted '\*'. Specifically, the '.' symbol is used for the taxa on the same side as the outgroup.

In a rooted or clock tree, the tree is rooted using the model and not by reference to an outgroup. Each bipartition therefore corresponds to a clade, that is, a group that includes all the descendants of a particular branch in the tree. Taxa that are included in each clade are denoted using '\*', and taxa that are not included are denoted using the '.' symbol.

The output first includes a key to all the bipartitions with frequency larger or equal to (Minpartfreq) in at least one run. Minpartfreq is a parameter to sumt command and currently it is set to 0.10. This is followed by a table with statistics for the informative bipartitions (those including at least two taxa), sorted from highest to lowest probability. For each bipartition, the table gives the number of times the partition or split was observed in all runs (#obs) and the posterior probability of the bipartition (Probab.), which is the same as the split frequency. If several runs are summarized, this is followed by the minimum split frequency (Min(s)), the maximum frequency (Max(s)), and the standard deviation of frequencies (Stddev(s)) across runs. The latter value should approach 0 for all bipartitions as MCMC runs converge.

This is followed by a table summarizing branch lengths, node heights (if a clock model was used) and relaxed clock parameters (if a relaxed clock model was used). The mean, variance, and 95 % credible interval are given for each of these parameters. If several runs are summarized, the potential scale reduction factor (PSRF) is also given; it should approach 1 as runs converge. Node heights will take calibration points into account, if such points were used in the analysis.

Note that Stddev may be unreliable if the partition is not present in all runs (the last column indicates the number of runs that sampled the partition if more than one run is summarized). The PSRF is not calculated at all if the partition is not present in all runs. The PSRF is also sensitive to small sample sizes and it should only be considered a rough guide to convergence since some of the assumptions allowing one to interpret it as a true potential scale reduction factor are violated in MrBayes.

List of taxa in bipartitions:

- 1 -- hax
- 2 -- gwi
- 3 -- dgr
- 4 -- scsh
- 5 -- xsl
- 6 -- bea
- 7 -- crx
- 8 -- chp

```

9 -- txc
10 -- haa
11 -- ing
12 -- kuu
13 -- hoi
14 -- koy
15 -- taa
16 -- aht
17 -- tfn
18 -- kkz
19 -- tcb
20 -- tau
21 -- ttmN
22 -- tceS
23 -- eya
24 -- tli
25 -- gce
26 -- tol
27 -- cco
28 -- hup
29 -- mtl
30 -- wlk
31 -- kto
32 -- apc
33 -- apw
34 -- apj
35 -- nav
36 -- apk
37 -- apl
38 -- srs
39 -- ket
40 -- zko

```

Key to taxon bipartitions (saved to file "DY-26Dec-strict-Hout-Ynotin.parts"):

```

ID -- Partition
-----
0 -- *****
1 -- *.....
2 -- .*.....
3 -- .*. ....
4 -- ..*....
5 -- ...*...
6 -- ....*..
7 -- .....*
8 -- .....*
9 -- .....*
10 -- .....*
11 -- .....*
12 -- .....*
13 -- .....*
14 -- .....*
15 -- .....*
16 -- .....*
17 -- .....*
18 -- .....*
19 -- .....*
20 -- .....*

```

```
21 -- .....*.....
22 -- .....*.....
23 -- .....*.....
24 -- .....*.....
25 -- .....*.....
26 -- .....*.....
27 -- .....*.....
28 -- .....*.....
29 -- .....*.....
30 -- .....*.....
31 -- .....*.....
32 -- .....*.....
33 -- .....*.....
34 -- .....*.....
35 -- .....*.....
36 -- .....*.....
37 -- .....*.....
38 -- .....*.....
39 -- .....*.....
40 -- .....*.....
41 -- .....**.....
42 -- *****.....
43 -- .....**.....
44 -- .....*****.....
45 -- .....****.....
46 -- .....**.....
47 -- .....* **.....
48 -- .....**.....
49 -- .....* **.....
50 -- .....****.....
51 -- .....*****.....
52 -- *** **.....
53 -- ***** ** *.....
54 -- .....***.....
55 -- .....* *.....
56 -- .....**.....
57 -- .....* * * * *.....
58 -- .....* * * * *.....
59 -- .....**.....
60 -- .....* **.....
61 -- .....***.....
62 -- .....**.....
63 -- .....* *.....
64 -- .....***.....
65 -- .....**.....
66 -- * .....**.....
67 -- .....**.....
68 -- .....* * * * *.....
69 -- .....**.....
70 -- .....* * * * *.....
71 -- **.....
72 -- *****.....
73 -- *****.....
74 -- .....****.....
75 -- .....**.....
76 -- *****.....
77 -- **.....
78 -- .....*** *****.....
```

```

79 -- ..... * . *** . ** .....
80 -- .. * . * .....
81 -- ..... ** .....
82 -- .. * . ** .....
83 -- .***** .....*****
84 -- .. * . * .....
85 -- ..... * . * .....
86 -- ..... * . ** .....
87 -- .***** * . ** .*****
88 -- ..... * .....
89 -- .*****
90 -- .. * . * . ** .....
91 -- ..... ** .....
92 -- ..... * .....
93 -- .*** . * .....
94 -- ..... * . * .....
95 -- .. * . ** .....
96 -- .***** .....*****
97 -- .. * . * ..... * . ** .....
98 -- ..... *** .....
99 -- ..... * .....
100 -- ..... * . * .....
101 -- ..... * .....
102 -- .*** .....
103 -- ..... * .....*****
104 -- .. * . * ..... ** .....
105 -- ..... * . * .....
106 -- ..... * . * .....
107 -- ..... * .....
108 -- ..... ** . **** .....
109 -- ..... * . * . ** .....
110 -- ..... ** . * .....
111 -- ..... * . * .....
112 -- ..... ** .....
113 -- .***** * . * .***** .....*****
-----

```

Summary statistics for informative taxon bipartitions (clades)  
(saved to file "DY-26Dec-strict-Hout-Ynotin.tstat"):

| ID | #obs | Probab.  |
|----|------|----------|
| 41 | 3001 | 1.000000 |
| 42 | 3001 | 1.000000 |
| 43 | 3000 | 0.999667 |
| 44 | 2742 | 0.913695 |
| 45 | 2596 | 0.865045 |
| 46 | 2489 | 0.829390 |
| 47 | 2453 | 0.817394 |
| 48 | 2427 | 0.808730 |
| 49 | 2386 | 0.795068 |
| 50 | 2363 | 0.787404 |
| 51 | 2223 | 0.740753 |
| 52 | 2189 | 0.729424 |
| 53 | 2101 | 0.700100 |
| 54 | 2095 | 0.698101 |
| 55 | 1902 | 0.633789 |
| 56 | 1840 | 0.613129 |

|     |      |          |
|-----|------|----------|
| 57  | 1815 | 0.604798 |
| 58  | 1780 | 0.593136 |
| 59  | 1779 | 0.592802 |
| 60  | 1753 | 0.584139 |
| 61  | 1711 | 0.570143 |
| 62  | 1678 | 0.559147 |
| 63  | 1550 | 0.516495 |
| 64  | 1550 | 0.516495 |
| 65  | 1344 | 0.447851 |
| 66  | 1315 | 0.438187 |
| 67  | 1308 | 0.435855 |
| 68  | 1259 | 0.419527 |
| 69  | 1233 | 0.410863 |
| 70  | 1232 | 0.410530 |
| 71  | 1224 | 0.407864 |
| 72  | 1208 | 0.402532 |
| 73  | 1103 | 0.367544 |
| 74  | 940  | 0.313229 |
| 75  | 938  | 0.312562 |
| 76  | 898  | 0.299234 |
| 77  | 896  | 0.298567 |
| 78  | 854  | 0.284572 |
| 79  | 800  | 0.266578 |
| 80  | 796  | 0.265245 |
| 81  | 790  | 0.263246 |
| 82  | 767  | 0.255581 |
| 83  | 766  | 0.255248 |
| 84  | 717  | 0.238920 |
| 85  | 667  | 0.222259 |
| 86  | 660  | 0.219927 |
| 87  | 598  | 0.199267 |
| 88  | 595  | 0.198267 |
| 89  | 583  | 0.194269 |
| 90  | 572  | 0.190603 |
| 91  | 571  | 0.190270 |
| 92  | 566  | 0.188604 |
| 93  | 562  | 0.187271 |
| 94  | 554  | 0.184605 |
| 95  | 543  | 0.180940 |
| 96  | 512  | 0.170610 |
| 97  | 504  | 0.167944 |
| 98  | 489  | 0.162946 |
| 99  | 484  | 0.161280 |
| 100 | 437  | 0.145618 |
| 101 | 434  | 0.144618 |
| 102 | 423  | 0.140953 |
| 103 | 411  | 0.136954 |
| 104 | 403  | 0.134289 |
| 105 | 388  | 0.129290 |
| 106 | 367  | 0.122293 |
| 107 | 367  | 0.122293 |
| 108 | 349  | 0.116295 |
| 109 | 336  | 0.111963 |
| 110 | 317  | 0.105631 |
| 111 | 314  | 0.104632 |
| 112 | 302  | 0.100633 |
| 113 | 302  | 0.100633 |

-----

Summary statistics for branch and node parameters  
(saved to file "DY-26Dec-strict-Hout-Ynotin.vstat"):

| Parameter  | Mean     | Variance | 95% HPD Interval |          | Median   |
|------------|----------|----------|------------------|----------|----------|
|            |          |          | Lower            | Upper    |          |
| length[1]  | 0.149021 | 0.001667 | 0.072231         | 0.222138 | 0.151446 |
| length[2]  | 0.037315 | 0.000264 | 0.011224         | 0.070794 | 0.035081 |
| length[3]  | 0.038527 | 0.000369 | 0.007472         | 0.075756 | 0.034763 |
| length[4]  | 0.033894 | 0.000254 | 0.007696         | 0.066035 | 0.031258 |
| length[5]  | 0.026910 | 0.000176 | 0.005262         | 0.053406 | 0.024800 |
| length[6]  | 0.033928 | 0.000429 | 0.004540         | 0.077011 | 0.028675 |
| length[7]  | 0.026087 | 0.000173 | 0.004540         | 0.052278 | 0.023711 |
| length[8]  | 0.033943 | 0.000199 | 0.011678         | 0.062474 | 0.032088 |
| length[9]  | 0.077738 | 0.000760 | 0.030209         | 0.130939 | 0.075027 |
| length[10] | 0.038054 | 0.000193 | 0.012807         | 0.064171 | 0.036822 |
| length[11] | 0.038798 | 0.000323 | 0.008381         | 0.073478 | 0.036493 |
| length[12] | 0.064047 | 0.000692 | 0.016491         | 0.115895 | 0.061844 |
| length[13] | 0.028292 | 0.000182 | 0.005960         | 0.054777 | 0.026238 |
| length[14] | 0.028895 | 0.000191 | 0.007661         | 0.058405 | 0.026620 |
| length[15] | 0.023359 | 0.000173 | 0.003215         | 0.050568 | 0.020581 |
| length[16] | 0.077707 | 0.000732 | 0.028646         | 0.129054 | 0.076062 |
| length[17] | 0.072818 | 0.000698 | 0.025545         | 0.123010 | 0.070354 |
| length[18] | 0.028083 | 0.000181 | 0.006291         | 0.054987 | 0.026166 |
| length[19] | 0.020803 | 0.000138 | 0.003021         | 0.043345 | 0.018432 |
| length[20] | 0.025653 | 0.000191 | 0.004518         | 0.054617 | 0.022889 |
| length[21] | 0.026936 | 0.000145 | 0.004764         | 0.048626 | 0.025352 |
| length[22] | 0.028276 | 0.000161 | 0.006865         | 0.052930 | 0.026578 |
| length[23] | 0.089295 | 0.001117 | 0.031513         | 0.158939 | 0.086111 |
| length[24] | 0.090682 | 0.001172 | 0.028811         | 0.158415 | 0.087102 |
| length[25] | 0.065840 | 0.000718 | 0.020920         | 0.119430 | 0.062619 |
| length[26] | 0.056992 | 0.000558 | 0.015092         | 0.101862 | 0.054247 |
| length[27] | 0.064051 | 0.000686 | 0.016303         | 0.112871 | 0.060695 |
| length[28] | 0.080657 | 0.001067 | 0.025057         | 0.144264 | 0.077095 |
| length[29] | 0.064110 | 0.000724 | 0.019062         | 0.115421 | 0.060244 |
| length[30] | 0.036410 | 0.000333 | 0.007256         | 0.071157 | 0.032948 |
| length[31] | 0.036934 | 0.000366 | 0.007550         | 0.074490 | 0.033083 |
| length[32] | 0.007055 | 0.000044 | 0.000003         | 0.020263 | 0.005045 |
| length[33] | 0.007046 | 0.000042 | 0.000003         | 0.019914 | 0.005019 |
| length[34] | 0.011777 | 0.000070 | 0.000212         | 0.027996 | 0.009934 |
| length[35] | 0.023291 | 0.000135 | 0.004389         | 0.045547 | 0.021076 |
| length[36] | 0.004294 | 0.000020 | 0.000005         | 0.012891 | 0.002917 |
| length[37] | 0.004297 | 0.000021 | 0.000005         | 0.012891 | 0.002917 |
| length[38] | 0.052303 | 0.000442 | 0.016462         | 0.092904 | 0.049761 |
| length[39] | 0.067992 | 0.000609 | 0.024310         | 0.114645 | 0.065959 |
| length[40] | 0.067992 | 0.000609 | 0.024310         | 0.114645 | 0.065959 |
| length[41] | 0.083565 | 0.000789 | 0.033112         | 0.138799 | 0.081689 |
| length[42] | 0.011059 | 0.000103 | 0.000007         | 0.031243 | 0.008255 |
| length[43] | 0.031191 | 0.000209 | 0.006132         | 0.058524 | 0.029229 |
| length[44] | 0.035025 | 0.000345 | 0.004089         | 0.072495 | 0.033027 |
| length[45] | 0.015662 | 0.000112 | 0.000032         | 0.036319 | 0.013492 |
| length[46] | 0.046171 | 0.000652 | 0.000026         | 0.092932 | 0.042852 |
| length[47] | 0.020892 | 0.000159 | 0.000051         | 0.044779 | 0.018939 |
| length[48] | 0.029713 | 0.000343 | 0.000032         | 0.064265 | 0.026263 |
| length[49] | 0.024321 | 0.000280 | 0.000588         | 0.056311 | 0.020545 |
| length[50] | 0.050135 | 0.000652 | 0.005136         | 0.098935 | 0.047728 |

|             |          |          |          |          |          |
|-------------|----------|----------|----------|----------|----------|
| length[51]  | 0.021255 | 0.000222 | 0.000000 | 0.050305 | 0.018035 |
| length[52]  | 0.021715 | 0.000244 | 0.000025 | 0.051070 | 0.019143 |
| length[53]  | 0.019680 | 0.000151 | 0.000500 | 0.042915 | 0.017724 |
| length[54]  | 0.012477 | 0.000096 | 0.000010 | 0.030689 | 0.010411 |
| length[55]  | 0.016073 | 0.000110 | 0.000049 | 0.035806 | 0.014099 |
| length[56]  | 0.015520 | 0.000136 | 0.000013 | 0.037846 | 0.012913 |
| length[57]  | 0.016845 | 0.000103 | 0.000020 | 0.036035 | 0.015330 |
| length[58]  | 0.014319 | 0.000090 | 0.000002 | 0.032932 | 0.012389 |
| length[59]  | 0.010344 | 0.000073 | 0.000006 | 0.027120 | 0.008221 |
| length[60]  | 0.009909 | 0.000055 | 0.000015 | 0.024532 | 0.008123 |
| length[61]  | 0.032698 | 0.000573 | 0.000020 | 0.078916 | 0.027677 |
| length[62]  | 0.021247 | 0.000211 | 0.000047 | 0.049778 | 0.018108 |
| length[63]  | 0.011110 | 0.000092 | 0.000001 | 0.032586 | 0.008380 |
| length[64]  | 0.026648 | 0.000295 | 0.000242 | 0.059169 | 0.023628 |
| length[65]  | 0.010455 | 0.000070 | 0.000003 | 0.027521 | 0.008473 |
| length[66]  | 0.009861 | 0.000081 | 0.000001 | 0.028046 | 0.007320 |
| length[67]  | 0.027749 | 0.000400 | 0.000049 | 0.064813 | 0.023567 |
| length[68]  | 0.019607 | 0.000104 | 0.003609 | 0.039578 | 0.017873 |
| length[69]  | 0.029171 | 0.000425 | 0.000003 | 0.070205 | 0.025185 |
| length[70]  | 0.023988 | 0.000182 | 0.000012 | 0.048041 | 0.022047 |
| length[71]  | 0.017695 | 0.000143 | 0.000033 | 0.040986 | 0.015014 |
| length[72]  | 0.013520 | 0.000104 | 0.000019 | 0.033348 | 0.011502 |
| length[73]  | 0.009464 | 0.000082 | 0.000011 | 0.027601 | 0.006911 |
| length[74]  | 0.025928 | 0.000291 | 0.000155 | 0.059801 | 0.022213 |
| length[75]  | 0.013537 | 0.000158 | 0.000004 | 0.039193 | 0.009806 |
| length[76]  | 0.012032 | 0.000069 | 0.000399 | 0.028022 | 0.010446 |
| length[77]  | 0.018103 | 0.000164 | 0.000149 | 0.042929 | 0.015221 |
| length[78]  | 0.016401 | 0.000142 | 0.000052 | 0.038212 | 0.013832 |
| length[79]  | 0.016363 | 0.000177 | 0.000030 | 0.045584 | 0.012601 |
| length[80]  | 0.014973 | 0.000135 | 0.000151 | 0.037706 | 0.012228 |
| length[81]  | 0.022266 | 0.000253 | 0.000025 | 0.051567 | 0.018872 |
| length[82]  | 0.016329 | 0.000186 | 0.000085 | 0.041764 | 0.012490 |
| length[83]  | 0.012805 | 0.000104 | 0.000020 | 0.033383 | 0.010634 |
| length[84]  | 0.007727 | 0.000055 | 0.000003 | 0.021404 | 0.005682 |
| length[85]  | 0.009915 | 0.000089 | 0.000008 | 0.027907 | 0.007351 |
| length[86]  | 0.022317 | 0.000336 | 0.000004 | 0.055773 | 0.018183 |
| length[87]  | 0.014097 | 0.000126 | 0.000018 | 0.034915 | 0.011341 |
| length[88]  | 0.006395 | 0.000036 | 0.000001 | 0.018014 | 0.004654 |
| length[89]  | 0.004851 | 0.000025 | 0.000004 | 0.013239 | 0.003163 |
| length[90]  | 0.018262 | 0.000176 | 0.000112 | 0.044099 | 0.015558 |
| length[91]  | 0.006172 | 0.000034 | 0.000078 | 0.017461 | 0.004189 |
| length[92]  | 0.005610 | 0.000030 | 0.000011 | 0.016308 | 0.003758 |
| length[93]  | 0.014938 | 0.000133 | 0.000002 | 0.036110 | 0.012744 |
| length[94]  | 0.006281 | 0.000033 | 0.000044 | 0.018665 | 0.004719 |
| length[95]  | 0.014357 | 0.000136 | 0.000025 | 0.037513 | 0.011685 |
| length[96]  | 0.011795 | 0.000097 | 0.000016 | 0.030274 | 0.009212 |
| length[97]  | 0.006223 | 0.000042 | 0.000007 | 0.021221 | 0.004177 |
| length[98]  | 0.011134 | 0.000079 | 0.000025 | 0.028473 | 0.008597 |
| length[99]  | 0.018275 | 0.000259 | 0.000102 | 0.052328 | 0.013932 |
| length[100] | 0.018077 | 0.000227 | 0.000034 | 0.047424 | 0.014468 |
| length[101] | 0.006733 | 0.000054 | 0.000001 | 0.022404 | 0.004621 |
| length[102] | 0.010688 | 0.000100 | 0.000010 | 0.027235 | 0.008518 |
| length[103] | 0.019679 | 0.000181 | 0.000353 | 0.044838 | 0.017205 |
| length[104] | 0.005498 | 0.000030 | 0.000004 | 0.015555 | 0.004063 |
| length[105] | 0.017864 | 0.000195 | 0.000050 | 0.043065 | 0.015390 |
| length[106] | 0.018512 | 0.000188 | 0.000026 | 0.043973 | 0.016105 |
| length[107] | 0.016268 | 0.000172 | 0.000026 | 0.040762 | 0.012532 |
| length[108] | 0.009846 | 0.000081 | 0.000012 | 0.028003 | 0.007204 |



|             |          |          |          |          |          |
|-------------|----------|----------|----------|----------|----------|
| length[109] | 0.013688 | 0.000129 | 0.000100 | 0.036721 | 0.010733 |
| length[110] | 0.005015 | 0.000029 | 0.000005 | 0.015598 | 0.003206 |
| length[111] | 0.007695 | 0.000059 | 0.000002 | 0.022708 | 0.005417 |
| length[112] | 0.028003 | 0.000725 | 0.000054 | 0.080112 | 0.019495 |
| length[113] | 0.014249 | 0.000100 | 0.000114 | 0.033999 | 0.011688 |
| height[0]   | 0.156820 | 0.001784 | 0.078873 | 0.234185 | 0.159286 |
| height[1]   | 0.000000 | 0.000000 | 0.000000 | 0.000000 | 0.000000 |
| height[2]   | 0.000000 | 0.000000 | 0.000000 | 0.000000 | 0.000000 |
| height[3]   | 0.000000 | 0.000000 | 0.000000 | 0.000000 | 0.000000 |
| height[4]   | 0.000000 | 0.000000 | 0.000000 | 0.000000 | 0.000000 |
| height[5]   | 0.000000 | 0.000000 | 0.000000 | 0.000000 | 0.000000 |
| height[6]   | 0.000000 | 0.000000 | 0.000000 | 0.000000 | 0.000000 |
| height[7]   | 0.000000 | 0.000000 | 0.000000 | 0.000000 | 0.000000 |
| height[8]   | 0.000000 | 0.000000 | 0.000000 | 0.000000 | 0.000000 |
| height[9]   | 0.000000 | 0.000000 | 0.000000 | 0.000000 | 0.000000 |
| height[10]  | 0.000000 | 0.000000 | 0.000000 | 0.000000 | 0.000000 |
| height[11]  | 0.000000 | 0.000000 | 0.000000 | 0.000000 | 0.000000 |
| height[12]  | 0.000000 | 0.000000 | 0.000000 | 0.000000 | 0.000000 |
| height[13]  | 0.000000 | 0.000000 | 0.000000 | 0.000000 | 0.000000 |
| height[14]  | 0.000000 | 0.000000 | 0.000000 | 0.000000 | 0.000000 |
| height[15]  | 0.000000 | 0.000000 | 0.000000 | 0.000000 | 0.000000 |
| height[16]  | 0.000000 | 0.000000 | 0.000000 | 0.000000 | 0.000000 |
| height[17]  | 0.000000 | 0.000000 | 0.000000 | 0.000000 | 0.000000 |
| height[18]  | 0.000000 | 0.000000 | 0.000000 | 0.000000 | 0.000000 |
| height[19]  | 0.000000 | 0.000000 | 0.000000 | 0.000000 | 0.000000 |
| height[20]  | 0.000000 | 0.000000 | 0.000000 | 0.000000 | 0.000000 |
| height[21]  | 0.000000 | 0.000000 | 0.000000 | 0.000000 | 0.000000 |
| height[22]  | 0.000000 | 0.000000 | 0.000000 | 0.000000 | 0.000000 |
| height[23]  | 0.000000 | 0.000000 | 0.000000 | 0.000000 | 0.000000 |
| height[24]  | 0.000000 | 0.000000 | 0.000000 | 0.000000 | 0.000000 |
| height[25]  | 0.000000 | 0.000000 | 0.000000 | 0.000000 | 0.000000 |
| height[26]  | 0.000000 | 0.000000 | 0.000000 | 0.000000 | 0.000000 |
| height[27]  | 0.000000 | 0.000000 | 0.000000 | 0.000000 | 0.000000 |
| height[28]  | 0.000000 | 0.000000 | 0.000000 | 0.000000 | 0.000000 |
| height[29]  | 0.000000 | 0.000000 | 0.000000 | 0.000000 | 0.000000 |
| height[30]  | 0.000000 | 0.000000 | 0.000000 | 0.000000 | 0.000000 |
| height[31]  | 0.000000 | 0.000000 | 0.000000 | 0.000000 | 0.000000 |
| height[32]  | 0.000000 | 0.000000 | 0.000000 | 0.000000 | 0.000000 |
| height[33]  | 0.000000 | 0.000000 | 0.000000 | 0.000000 | 0.000000 |
| height[34]  | 0.000000 | 0.000000 | 0.000000 | 0.000000 | 0.000000 |
| height[35]  | 0.000000 | 0.000000 | 0.000000 | 0.000000 | 0.000000 |
| height[36]  | 0.000000 | 0.000000 | 0.000000 | 0.000000 | 0.000000 |
| height[37]  | 0.000000 | 0.000000 | 0.000000 | 0.000000 | 0.000000 |
| height[38]  | 0.000000 | 0.000000 | 0.000000 | 0.000000 | 0.000000 |
| height[39]  | 0.000000 | 0.000000 | 0.000000 | 0.000000 | 0.000000 |
| height[40]  | 0.000000 | 0.000000 | 0.000000 | 0.000000 | 0.000000 |
| height[41]  | 0.067992 | 0.000609 | 0.024310 | 0.114645 | 0.065959 |
| height[42]  | 0.141341 | 0.001419 | 0.067422 | 0.205022 | 0.145099 |
| height[43]  | 0.004281 | 0.000020 | 0.000005 | 0.012770 | 0.002917 |
| height[44]  | 0.053039 | 0.000342 | 0.020080 | 0.088245 | 0.051486 |
| height[45]  | 0.023192 | 0.000106 | 0.006107 | 0.043449 | 0.021450 |
| height[46]  | 0.084963 | 0.000938 | 0.028866 | 0.143800 | 0.083234 |
| height[47]  | 0.027546 | 0.000156 | 0.007971 | 0.054617 | 0.025780 |
| height[48]  | 0.032323 | 0.000215 | 0.007256 | 0.059388 | 0.030329 |
| height[49]  | 0.038862 | 0.000245 | 0.011268 | 0.068063 | 0.037434 |
| height[50]  | 0.083481 | 0.000886 | 0.029882 | 0.138897 | 0.081104 |
| height[51]  | 0.035366 | 0.000176 | 0.012133 | 0.060569 | 0.033874 |
| height[52]  | 0.053903 | 0.000319 | 0.022109 | 0.088277 | 0.053051 |

|             |          |          |          |          |          |
|-------------|----------|----------|----------|----------|----------|
| height[53]  | 0.112288 | 0.000875 | 0.053280 | 0.161754 | 0.114688 |
| height[54]  | 0.012070 | 0.000052 | 0.001183 | 0.026022 | 0.010610 |
| height[55]  | 0.023238 | 0.000117 | 0.006090 | 0.045362 | 0.021779 |
| height[56]  | 0.025763 | 0.000141 | 0.005809 | 0.048093 | 0.024152 |
| height[57]  | 0.052377 | 0.000247 | 0.022749 | 0.080302 | 0.052209 |
| height[58]  | 0.043490 | 0.000191 | 0.018538 | 0.069192 | 0.042577 |
| height[59]  | 0.004792 | 0.000021 | 0.000003 | 0.013665 | 0.003414 |
| height[60]  | 0.032005 | 0.000132 | 0.012350 | 0.054066 | 0.031159 |
| height[61]  | 0.057803 | 0.000455 | 0.018761 | 0.096093 | 0.056069 |
| height[62]  | 0.022643 | 0.000127 | 0.003093 | 0.044245 | 0.020810 |
| height[63]  | 0.018462 | 0.000094 | 0.002962 | 0.037406 | 0.016665 |
| height[64]  | 0.072050 | 0.000555 | 0.027783 | 0.114274 | 0.071492 |
| height[65]  | 0.023267 | 0.000112 | 0.006279 | 0.043142 | 0.021456 |
| height[66]  | 0.144380 | 0.001577 | 0.070668 | 0.217572 | 0.146430 |
| height[67]  | 0.053607 | 0.000433 | 0.015092 | 0.090608 | 0.051747 |
| height[68]  | 0.064398 | 0.000355 | 0.033779 | 0.101876 | 0.062733 |
| height[69]  | 0.053603 | 0.000436 | 0.018318 | 0.093609 | 0.051536 |
| height[70]  | 0.071347 | 0.000427 | 0.030631 | 0.106287 | 0.072726 |
| height[71]  | 0.031559 | 0.000201 | 0.008133 | 0.059098 | 0.029277 |
| height[72]  | 0.128446 | 0.001260 | 0.057051 | 0.190155 | 0.131043 |
| height[73]  | 0.151020 | 0.001621 | 0.075716 | 0.222711 | 0.153386 |
| height[74]  | 0.059943 | 0.000470 | 0.020006 | 0.100306 | 0.058630 |
| height[75]  | 0.020132 | 0.000122 | 0.003021 | 0.040456 | 0.018180 |
| height[76]  | 0.101123 | 0.000646 | 0.048505 | 0.142494 | 0.102860 |
| height[77]  | 0.031641 | 0.000190 | 0.007815 | 0.057848 | 0.029938 |
| height[78]  | 0.094250 | 0.000689 | 0.047780 | 0.144646 | 0.094428 |
| height[79]  | 0.050883 | 0.000294 | 0.020615 | 0.082825 | 0.049033 |
| height[80]  | 0.025551 | 0.000134 | 0.007696 | 0.049627 | 0.023524 |
| height[81]  | 0.065526 | 0.000463 | 0.029278 | 0.108143 | 0.063638 |
| height[82]  | 0.037122 | 0.000214 | 0.012800 | 0.065197 | 0.035473 |
| height[83]  | 0.130663 | 0.001227 | 0.062344 | 0.187474 | 0.136262 |
| height[84]  | 0.035449 | 0.000150 | 0.013317 | 0.058154 | 0.033652 |
| height[85]  | 0.028830 | 0.000176 | 0.005256 | 0.052964 | 0.027352 |
| height[86]  | 0.062723 | 0.000498 | 0.023960 | 0.104471 | 0.061056 |
| height[87]  | 0.077580 | 0.000493 | 0.037065 | 0.117100 | 0.076215 |
| height[88]  | 0.028856 | 0.000128 | 0.011165 | 0.051318 | 0.028065 |
| height[89]  | 0.150856 | 0.001735 | 0.066047 | 0.220686 | 0.154328 |
| height[90]  | 0.043581 | 0.000235 | 0.017986 | 0.072589 | 0.042282 |
| height[91]  | 0.006946 | 0.000030 | 0.000090 | 0.017741 | 0.005178 |
| height[92]  | 0.028649 | 0.000126 | 0.009347 | 0.048488 | 0.027106 |
| height[93]  | 0.044330 | 0.000225 | 0.018636 | 0.073373 | 0.043547 |
| height[94]  | 0.006529 | 0.000025 | 0.000130 | 0.016044 | 0.005274 |
| height[95]  | 0.040516 | 0.000221 | 0.014266 | 0.069173 | 0.039093 |
| height[96]  | 0.102403 | 0.000774 | 0.045180 | 0.146079 | 0.104675 |
| height[97]  | 0.040255 | 0.000178 | 0.015671 | 0.064084 | 0.039728 |
| height[98]  | 0.037310 | 0.000195 | 0.012862 | 0.065803 | 0.035321 |
| height[99]  | 0.066238 | 0.000588 | 0.024187 | 0.111913 | 0.064915 |
| height[100] | 0.062714 | 0.000538 | 0.023678 | 0.108604 | 0.060137 |
| height[101] | 0.020730 | 0.000098 | 0.004400 | 0.039674 | 0.019319 |
| height[102] | 0.042927 | 0.000249 | 0.013160 | 0.070348 | 0.041114 |
| height[103] | 0.072805 | 0.000622 | 0.028826 | 0.119901 | 0.070774 |
| height[104] | 0.038953 | 0.000164 | 0.017486 | 0.064967 | 0.038606 |
| height[105] | 0.060349 | 0.000475 | 0.023550 | 0.103502 | 0.057746 |
| height[106] | 0.068859 | 0.000502 | 0.033260 | 0.112444 | 0.066800 |
| height[107] | 0.073714 | 0.000598 | 0.031600 | 0.121944 | 0.073715 |
| height[108] | 0.129556 | 0.001227 | 0.059111 | 0.183467 | 0.132371 |
| height[109] | 0.081265 | 0.000548 | 0.045171 | 0.126128 | 0.079243 |
| height[110] | 0.017989 | 0.000077 | 0.004771 | 0.035068 | 0.016609 |



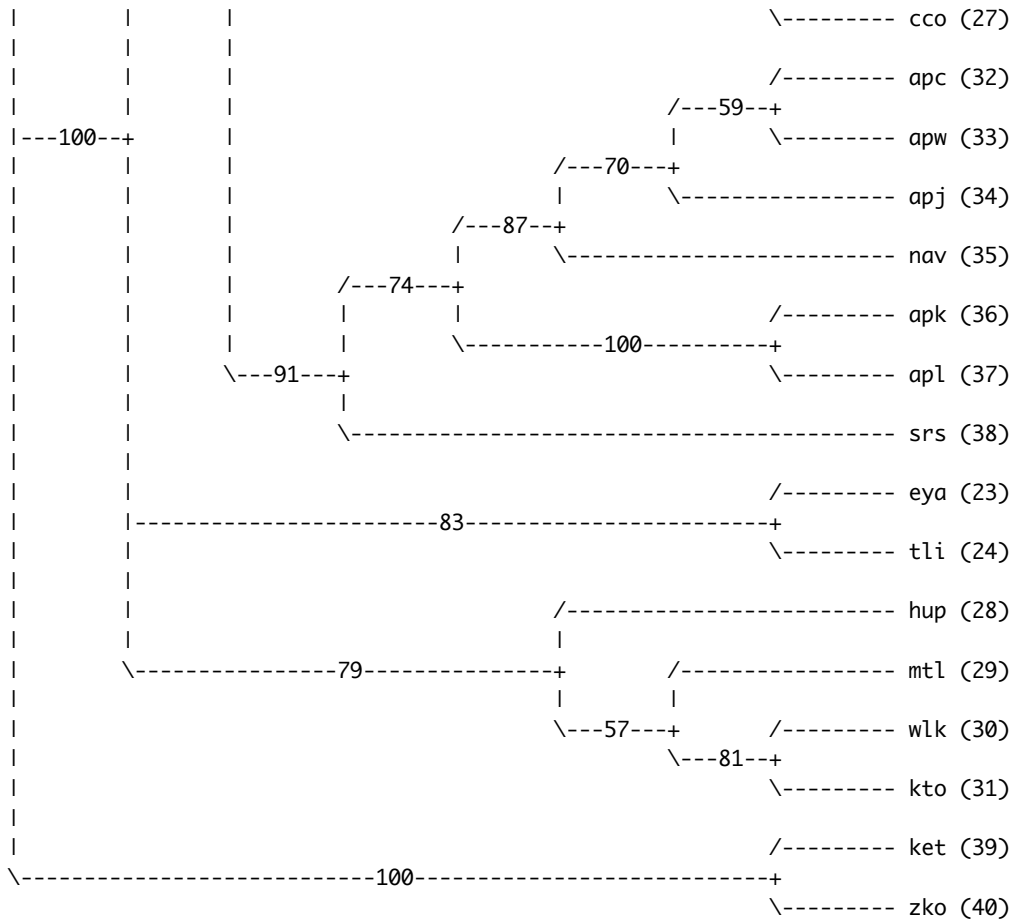

Phylogram (based on median node depths):

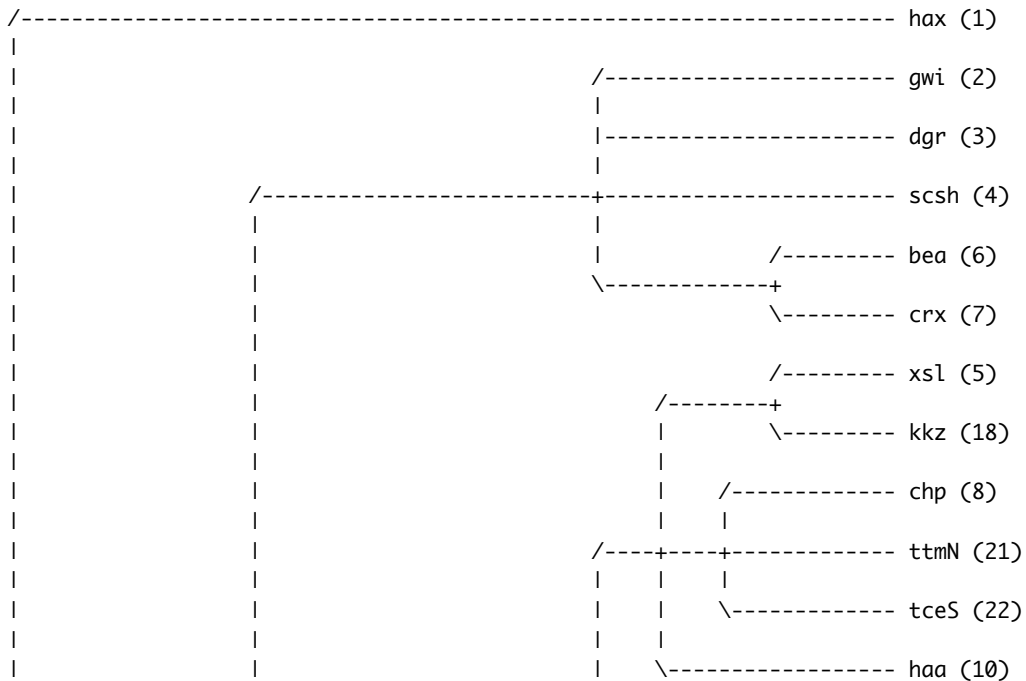



0.14 0.12 0.10 0.08 0.06 0.04 0.02 -0.00

[Expected changes per site]

Calculating tree probabilities...

Credible sets of trees (3001 trees sampled):

50 % credible set contains 1501 trees

90 % credible set contains 2701 trees

95 % credible set contains 2851 trees

99 % credible set contains 2971 trees

MrBayes > sump relburnin=yes

Using relative burnin (a fraction of samples discarded).

Summarizing parameters in file DY-26Dec-strict-Hout-Ynotin.p

Writing summary statistics to file DY-26Dec-strict-Hout-Ynotin.pstat

Using relative burnin ('relburnin=yes'), discarding the first 25 % of samples

Below is a rough plot of the generation (x-axis) versus the log probability of observing the data (y-axis). You can use this graph to determine what the burn in for your analysis should be. When the log probability starts to plateau you may be at stationarity. Sample trees and parameters after the log probability plateaus. Of course, this is not a guarantee that you are at stationarity. When the log probability starts to plateau different random trees; if the inferences you make for independent analyses are the same, this is reasonable evidence that the chains have converged. You can use MrBayes to run several independent analyses simultaneously. During such a run, MrBayes will monitor the convergence of topologies. After the run has been completed, the 'sumt' and 'sump' functions will provide additional convergence diagnostics for all the parameters in your model. Remember that the burn in is the number of samples to discard. There are a total of  $\text{ngen} / \text{samplefreq}$  samples taken during a MCMC analysis.

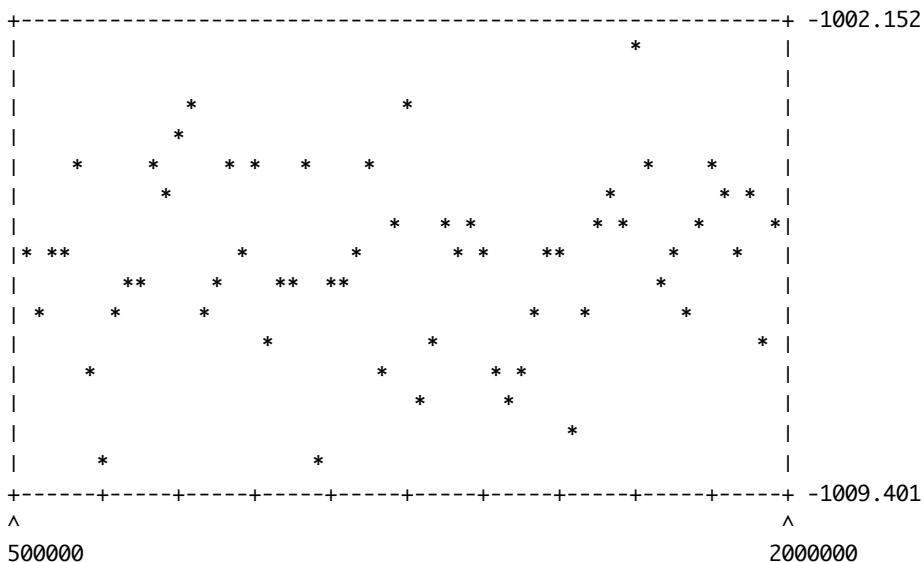

Estimated marginal likelihoods for run sampled in file "DY-26Dec-strict-Hout-Ynotin.p":  
 (Use the harmonic mean for Bayes factor comparisons of models)  
 (Values are saved to the file /Users/msicoli/DY-Typlogical\_binary\_bayes-2.nex.lstat)

| Arithmetic mean | Harmonic mean |
|-----------------|---------------|
| -994.93         | -1029.49      |

Model parameter summaries for run sampled in file "DY-26Dec-strict-Hout-Ynotin":  
 Based on a total of 3001 samples out of a total of 4001 samples  
 from this analysis.  
 Parameter summaries saved to file "/Users/msicoli/DY-Typlogical\_binary\_bayes-2.nex.pstat".

| Parameter | Mean     | Variance | 95% HPD Interval |          | Median   | ESS*    |
|-----------|----------|----------|------------------|----------|----------|---------|
|           |          |          | Lower            | Upper    |          |         |
| TH        | 0.156820 | 0.001784 | 0.078873         | 0.234185 | 0.159286 | 384.87  |
| TL        | 2.527047 | 0.419954 | 1.269098         | 3.627597 | 2.598859 | 375.61  |
| alpha     | 1.211592 | 7.561679 | 0.126431         | 2.664872 | 0.928030 | 2141.27 |

\* Convergence diagnostic (ESS = Estimated Sample Size); ESS value below 100 may indicate that the parameter is undersampled.

MrBayes > ssp ngen=100000 diagnfreq=1000 filename=YND-Typ-Hout-YnotinND-ss

Setting number of generations to 100000  
 Setting diagnosing frequency to 1000

MrBayes > ss

Setting chain output file names to "YND-Typ-Hout-YnotinND-ss.<p/t>"  
 Running Markov chain  
 MCMC stamp = 7233609125  
 Seed = 208011611  
 Swapseed = 1272127178  
 Model settings:

Data not partitioned --  
 Datatype = Standard  
 Coding = Variable  
 # States = Variable, up to 10  
 State frequencies are fixed to be equal  
 Rates = Gamma  
 Gamma shape parameter is uniformly distributed on the interval (0.00,200.00).  
 Gamma distribution is approximated using 4 categories.  
 Likelihood summarized over all rate categories in each generation.

Active parameters:

Parameters  
 -----

Statefreq 1  
Shape 2  
Ratemultiplier 3  
Topology 4  
Brlens 5  
Clockrate 6  
-----

1 -- Parameter = Alpha\_symdir  
Type = Symmetric dirichlet/beta distribution alpha\_i parameter  
Prior = Symmetric dirichlet with fixed(-1.00) variance parameter

2 -- Parameter = Alpha  
Type = Shape of scaled gamma distribution of site rates  
Prior = Uniform(0.00,200.00)

3 -- Parameter = Ratemultiplier  
Type = Partition-specific rate multiplier  
Prior = Fixed(1.0)

4 -- Parameter = Tau  
Type = Topology  
Prior = Prior on topologies obeys constraints  
Subparam. = V

5 -- Parameter = V  
Type = Branch lengths  
Prior = Clock:Uniform  
Tree age has an Exponential(1.000) distribution  
Node ages are not constrained

6 -- Parameter = Clockrate  
Type = Base rate of clock  
Prior = Fixed(1.000000)  
The clock rate is constant (strict clock)

Number of taxa = 40  
Number of characters = 116

The MCMC sampler will use the following moves:

With prob. Chain will use move  
2.38 % Multiplier(Alpha)  
11.90 % ExtSprClock(Tau,V)  
23.81 % NNIClock(Tau,V)  
11.90 % ParsSPRClock(Tau,V)  
47.62 % NodesliderClock(V)  
2.38 % TreeStretch(V)

Division 1 has 81 unique site patterns  
Initializing conditional likelihoods  
Using standard non-SSE likelihood calculator for division 1 (single-precision)

Initial log likelihoods and log prior probs:

Chain 1 -- -999.653079 -- -8.415782  
Chain 2 -- -999.693164 -- -35.880936  
Chain 3 -- -1022.327222 -- -32.409647  
Chain 4 -- -1018.502047 -- -36.524456



Starting stepping-stone sampling to estimate marginal likelihood.  
50 steps will be used with 1500 generations (3 samples) within each step.  
Total of 76500 generations (153 samples) will be collected while first  
1500 generations (3 samples) will be discarded as initial burnin.  
Additionally at the beginning of each step 0 generations (0 samples)  
will be discarded as burnin.

Sampling from posterior to prior, i.e. first step samples from close to  
posterior.

NOTE: Number of generation of each step is reduced to the closest multiple  
of sampling frequency. That is why, in total it will be taken 76500 gene-  
rations instead of requested 100000.

Chain results (76500 generations requested):

0 -- [-999.653] (-999.693) (-1022.327) (-1018.502)

Sampling step 1 out of 50 steps...

Sampling step 2 out of 50 steps...

Sampling step 3 out of 50 steps...

Sampling step 4 out of 50 steps...

Sampling step 5 out of 50 steps...

Sampling step 6 out of 50 steps...

10000 -- [-1014.688] (-1036.589) (-1027.784) (-1025.635) -- 0:00:46

Sampling step 7 out of 50 steps...

Sampling step 8 out of 50 steps...

Sampling step 9 out of 50 steps...

Sampling step 10 out of 50 steps...

Sampling step 11 out of 50 steps...

Sampling step 12 out of 50 steps...

Sampling step 13 out of 50 steps...

20000 -- (-1104.824) [-1079.987] (-1054.040) (-1059.171) -- 0:00:39

Sampling step 14 out of 50 steps...

Sampling step 15 out of 50 steps...

Sampling step 16 out of 50 steps...

Sampling step 17 out of 50 steps...

Sampling step 18 out of 50 steps...

Sampling step 19 out of 50 steps...

30000 -- (-1209.043) (-1184.110) [-1177.874] (-1288.336) -- 0:00:31  
Sampling step 20 out of 50 steps...

Sampling step 21 out of 50 steps...

Sampling step 22 out of 50 steps...

Sampling step 23 out of 50 steps...

Sampling step 24 out of 50 steps...

Sampling step 25 out of 50 steps...

Sampling step 26 out of 50 steps...

40000 -- (-1246.398) [-1217.938] (-1401.095) (-1334.210) -- 0:00:23  
Sampling step 27 out of 50 steps...

Sampling step 28 out of 50 steps...

Sampling step 29 out of 50 steps...

Sampling step 30 out of 50 steps...

Sampling step 31 out of 50 steps...

Sampling step 32 out of 50 steps...

Sampling step 33 out of 50 steps...

50000 -- [-1331.447] (-1391.716) (-1377.776) (-1371.829) -- 0:00:16  
Sampling step 34 out of 50 steps...

Sampling step 35 out of 50 steps...

Sampling step 36 out of 50 steps...

Sampling step 37 out of 50 steps...

Sampling step 38 out of 50 steps...

Sampling step 39 out of 50 steps...

60000 -- (-1451.355) (-1343.767) [-1521.399] (-1416.850) -- 0:00:10  
Sampling step 40 out of 50 steps...

Sampling step 41 out of 50 steps...

Sampling step 42 out of 50 steps...

Sampling step 43 out of 50 steps...

Sampling step 44 out of 50 steps...

Sampling step 45 out of 50 steps...

Sampling step 46 out of 50 steps...

70000 -- (-2313.645) (-1450.966) [-1508.777] (-2264.034) -- 0:00:04  
Sampling step 47 out of 50 steps...

Sampling step 48 out of 50 steps...

Sampling step 49 out of 50 steps...

Sampling step 50 out of 50 steps...

Analysis completed in 49 seconds  
Analysis used 47.91 seconds of CPU time  
Log likelihood of best state for "cold" chain was -988.36

Marginal likelihood (in natural log units) estimated using stepping-stone sampling based on 50 steps with 1500 generations (3 samples) within each step.

```
Run   Marginal likelihood (ln)
-----
1     -1118.81
-----
```

More statistics on stepping-stone sampling is dumped to YND-Typ-Hout-YnotinND-ss.ss file.

Plot of average standard deviation of split frequencies across steps.  
Points at -1.0 (y-axis) indicate that there were no splits  
above minimum frequency for corresponding step.

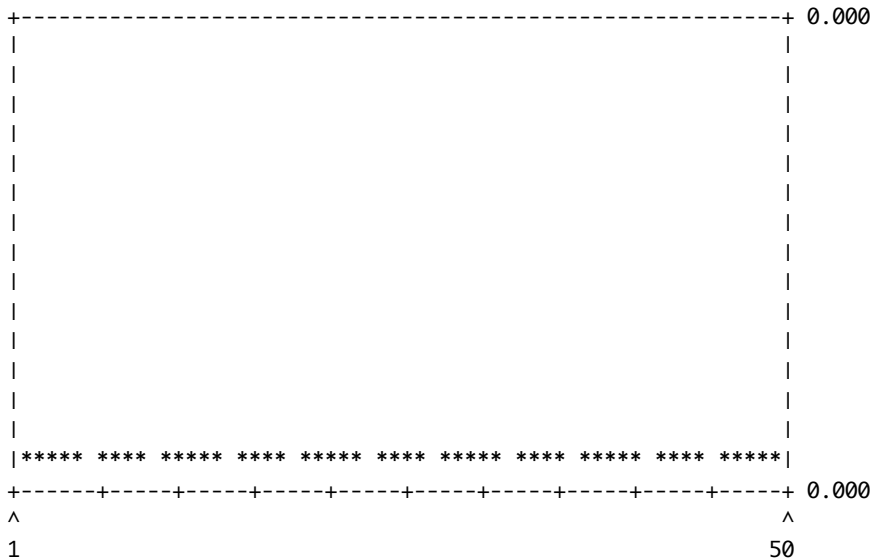

Acceptance rates for the moves in the "cold" chain:

| With prob. | (last 100) | chain accepted proposals by move |
|------------|------------|----------------------------------|
| 48.3 %     | ( 56 %)    | Multiplier(Alpha)                |
| 44.0 %     | ( 68 %)    | ExtSprClock(Tau,V)               |
| 78.0 %     | (100 %)    | NNIClock(Tau,V)                  |
| 34.2 %     | ( 32 %)    | ParsSPRClock(Tau,V)              |
| 85.9 %     | ( 98 %)    | NodesliderClock(V)               |
| 52.3 %     | ( 87 %)    | TreeStretch(V)                   |

Chain swap information:

|   | 1     | 2     | 3     | 4    |
|---|-------|-------|-------|------|
| 1 |       | 0.22  | 0.07  | 0.02 |
| 2 | 12788 |       | 0.32  | 0.09 |
| 3 | 12613 | 12830 |       | 0.41 |
| 4 | 12848 | 12764 | 12657 |      |

Upper diagonal: Proportion of successful state exchanges between chains  
Lower diagonal: Number of attempted state exchanges between chains

Chain information:

```
ID -- Heat
-----
1 -- 1.00 (cold chain)
2 -- 0.91
3 -- 0.83
4 -- 0.77
```

Heat =  $1 / (1 + T * (ID - 1))$   
(where T = 0.10 is the temperature and ID is the chain number)

MrBayes > ss

```
Running Markov chain
MCMC stamp = 7068357459
Seed = 1721729764
Swapseed = 370168243
Model settings:
```

```
Data not partitioned --
Datatype = Standard
Coding = Variable
# States = Variable, up to 10
          State frequencies are fixed to be equal
Rates = Gamma
          Gamma shape parameter is uniformly distributed on the interval (0.00,200.00).
          Gamma distribution is approximated using 4 categories.
          Likelihood summarized over all rate categories in each generation.
```

Active parameters:

```
Parameters
-----
Statefreq      1
Shape          2
Ratemultiplier 3
Topology       4
Brlens         5
Clockrate      6
-----

1 -- Parameter = Alpha_symdir
   Type       = Symmetric dirichlet/beta distribution alpha_i parameter
   Prior      = Symmetric dirichlet with fixed(-1.00) variance parameter
```

```

2 -- Parameter = Alpha
   Type       = Shape of scaled gamma distribution of site rates
   Prior      = Uniform(0.00,200.00)

3 -- Parameter = Ratemultiplier
   Type       = Partition-specific rate multiplier
   Prior      = Fixed(1.0)

4 -- Parameter = Tau
   Type       = Topology
   Prior      = Prior on topologies obeys constraints
   Subparam.  = V

5 -- Parameter = V
   Type       = Branch lengths
   Prior      = Clock:Uniform
               Tree age has an Exponential(1.000) distribution
               Node ages are not constrained

6 -- Parameter = Clockrate
   Type       = Base rate of clock
   Prior      = Fixed(1.000000)
               The clock rate is constant (strict clock)

```

Number of taxa = 40  
Number of characters = 116

The MCMC sampler will use the following moves:

```

With prob. Chain will use move
 2.38 % Multiplier(Alpha)
11.90 % ExtSprClock(Tau,V)
23.81 % NNIClock(Tau,V)
11.90 % ParsSPRClock(Tau,V)
47.62 % NodesliderClock(V)
 2.38 % TreeStretch(V)

```

Division 1 has 81 unique site patterns  
Initializing conditional likelihoods  
Using standard non-SSE likelihood calculator for division 1 (single-precision)

Initial log likelihoods and log prior probs:

```

Chain 1 -- -1680.778432 -- -40.364893
Chain 2 -- -2231.300002 -- -144.822360
Chain 3 -- -2285.777987 -- -202.533686
Chain 4 -- -2300.315466 -- -201.910542

```

Starting stepping-stone sampling to estimate marginal likelihood.  
50 steps will be used with 1500 generations (3 samples) within each step.  
Total of 76500 generations (153 samples) will be collected while first  
1500 generations (3 samples) will be discarded as initial burnin.  
Additionally at the beginning of each step 0 generations (0 samples)  
will be discarded as burnin.  
Sampling from posterior to prior, i.e. first step samples from close to  
posterior.

There are results from a previous run saved using the same filename(s).  
Do you want to overwrite these results? (yes/no): n

Please specify a different file name before running the mcmc analysis.

You can do that using 'mcmc filename=<name>'. You can also move or  
rename the old result files.

Error preparing print files

Error in command "Ss"

MrBayes > ss

Running Markov chain

MCMC stamp = 2928313836

Seed = 1721729764

Swapseed = 370168243

Model settings:

Data not partitioned --

Datatype = Standard

Coding = Variable

# States = Variable, up to 10

State frequencies are fixed to be equal

Rates = Gamma

Gamma shape parameter is uniformly distributed on the interval (0.00,200.00).

Gamma distribution is approximated using 4 categories.

Likelihood summarized over all rate categories in each generation.

Active parameters:

Parameters

-----

Statefreq 1

Shape 2

Ratemultiplier 3

Topology 4

Brlens 5

Clockrate 6

-----

1 -- Parameter = Alpha\_symdir

Type = Symmetric dirichlet/beta distribution alpha\_i parameter

Prior = Symmetric dirichlet with fixed(-1.00) variance parameter

2 -- Parameter = Alpha

Type = Shape of scaled gamma distribution of site rates

Prior = Uniform(0.00,200.00)

3 -- Parameter = Ratemultiplier

Type = Partition-specific rate multiplier

Prior = Fixed(1.0)

4 -- Parameter = Tau

Type = Topology

Prior = Prior on topologies obeys constraints

Subparam. = V

```
5 -- Parameter = V
   Type      = Branch lengths
   Prior     = Clock:Uniform
             Tree age has an Exponential(1.000) distribution
             Node ages are not constrained

6 -- Parameter = Clockrate
   Type      = Base rate of clock
   Prior     = Fixed(1.000000)
             The clock rate is constant (strict clock)
```

Number of taxa = 40  
Number of characters = 116

The MCMC sampler will use the following moves:

```
With prob. Chain will use move
 2.38 % Multiplier(Alpha)
11.90 % ExtSprClock(Tau,V)
23.81 % NNIClock(Tau,V)
11.90 % ParsSPRClock(Tau,V)
47.62 % NodesliderClock(V)
 2.38 % TreeStretch(V)
```

Division 1 has 81 unique site patterns  
Initializing conditional likelihoods  
Using standard non-SSE likelihood calculator for division 1 (single-precision)

Initial log likelihoods and log prior probs:

```
Chain 1 -- -1680.778432 -- -40.364893
Chain 2 -- -2231.300002 -- -144.822360
Chain 3 -- -2285.777987 -- -202.533686
Chain 4 -- -2300.315466 -- -201.910542
```

Starting stepping-stone sampling to estimate marginal likelihood.  
50 steps will be used with 1500 generations (3 samples) within each step.  
Total of 76500 generations (153 samples) will be collected while first  
1500 generations (3 samples) will be discarded as initial burnin.  
Additionally at the beginning of each step 0 generations (0 samples)  
will be discarded as burnin.  
Sampling from posterior to prior, i.e. first step samples from close to  
posterior.

Chain results (76500 generations requested):

```
0 -- [-1680.778] (-2231.300) (-2285.778) (-2300.315)
```

Sampling step 1 out of 50 steps...

Sampling step 2 out of 50 steps...

Sampling step 3 out of 50 steps...

Sampling step 4 out of 50 steps...

Sampling step 5 out of 50 steps...

Sampling step 6 out of 50 steps...

10000 -- [-1044.196] (-1021.140) (-1043.047) (-1032.717) -- 0:00:46  
Sampling step 7 out of 50 steps...

Sampling step 8 out of 50 steps...

Sampling step 9 out of 50 steps...

Sampling step 10 out of 50 steps...

Sampling step 11 out of 50 steps...

Sampling step 12 out of 50 steps...

Sampling step 13 out of 50 steps...

20000 -- (-1113.119) (-1109.920) [-1067.840] (-1075.641) -- 0:00:36  
Sampling step 14 out of 50 steps...

Sampling step 15 out of 50 steps...

Sampling step 16 out of 50 steps...

Sampling step 17 out of 50 steps...

Sampling step 18 out of 50 steps...

Sampling step 19 out of 50 steps...

30000 -- [-1122.192] (-1107.338) (-1337.333) (-1138.509) -- 0:00:29  
Sampling step 20 out of 50 steps...

Sampling step 21 out of 50 steps...

Sampling step 22 out of 50 steps...

Sampling step 23 out of 50 steps...

Sampling step 24 out of 50 steps...

Sampling step 25 out of 50 steps...

Sampling step 26 out of 50 steps...

40000 -- (-1311.252) (-1365.492) (-1334.048) [-1205.317] -- 0:00:23  
Sampling step 27 out of 50 steps...

Sampling step 28 out of 50 steps...

Sampling step 29 out of 50 steps...

Sampling step 30 out of 50 steps...

Sampling step 31 out of 50 steps...

Sampling step 32 out of 50 steps...



Sampling step 33 out of 50 steps...

50000 -- (-1361.075) (-1397.984) [-1355.495] (-1411.142) -- 0:00:16

Sampling step 34 out of 50 steps...

Sampling step 35 out of 50 steps...

Sampling step 36 out of 50 steps...

Sampling step 37 out of 50 steps...

Sampling step 38 out of 50 steps...

Sampling step 39 out of 50 steps...

60000 -- [-1412.985] (-1420.651) (-1454.691) (-1428.179) -- 0:00:10

Sampling step 40 out of 50 steps...

Sampling step 41 out of 50 steps...

Sampling step 42 out of 50 steps...

Sampling step 43 out of 50 steps...

Sampling step 44 out of 50 steps...

Sampling step 45 out of 50 steps...

Sampling step 46 out of 50 steps...

70000 -- [-1462.462] (-2239.231) (-2297.458) (-2235.560) -- 0:00:04

Sampling step 47 out of 50 steps...

Sampling step 48 out of 50 steps...

Sampling step 49 out of 50 steps...

Sampling step 50 out of 50 steps...

Analysis completed in 49 seconds

Analysis used 48.09 seconds of CPU time

Log likelihood of best state for "cold" chain was -994.86

Marginal likelihood (in natural log units) estimated using stepping-stone sampling based on 50 steps with 1500 generations (3 samples) within each step.

| Run | Marginal likelihood (ln) |
|-----|--------------------------|
| 1   | -1117.61                 |

More statistics on stepping-stone sampling is dumped to YND-Typ-Hout-YnotinND-ss.ss file.

Plot of average standard deviation of split frequencies across steps.  
Points at -1.0 (y-axis) indicate that there were no splits  
above minimum frequency for corresponding step.

+-----+ 0.000



Seed = 1467775986  
Swapseed = 171795935  
Model settings:

Data not partitioned --  
Datatype = Standard  
Coding = Variable  
# States = Variable, up to 10  
State frequencies are fixed to be equal  
Rates = Gamma  
Gamma shape parameter is uniformly distributed on the interval (0.00,200.00).  
Gamma distribution is approximated using 4 categories.  
Likelihood summarized over all rate categories in each generation.

Active parameters:

Parameters  
-----  
Statefreq 1  
Shape 2  
Ratemultiplier 3  
Topology 4  
Brlens 5  
Clockrate 6  
-----

1 -- Parameter = Alpha\_symdir  
Type = Symmetric dirichlet/beta distribution alpha\_i parameter  
Prior = Symmetric dirichlet with fixed(-1.00) variance parameter

2 -- Parameter = Alpha  
Type = Shape of scaled gamma distribution of site rates  
Prior = Uniform(0.00,200.00)

3 -- Parameter = Ratemultiplier  
Type = Partition-specific rate multiplier  
Prior = Fixed(1.0)

4 -- Parameter = Tau  
Type = Topology  
Prior = Prior on topologies obeys constraints  
Subparam. = V

5 -- Parameter = V  
Type = Branch lengths  
Prior = Clock:Uniform  
Tree age has an Exponential(1.000) distribution  
Node ages are not constrained

6 -- Parameter = Clockrate  
Type = Base rate of clock  
Prior = Fixed(1.000000)  
The clock rate is constant (strict clock)

Number of taxa = 40  
Number of characters = 116

The MCMC sampler will use the following moves:

```
With prob. Chain will use move
 2.38 % Multiplier(Alpha)
11.90 % ExtSprClock(Tau,V)
23.81 % NNIClock(Tau,V)
11.90 % ParsSPRClock(Tau,V)
47.62 % NodesliderClock(V)
 2.38 % TreeStretch(V)
```

Division 1 has 81 unique site patterns

Initializing conditional likelihoods

Using standard non-SSE likelihood calculator for division 1 (single-precision)

Initial log likelihoods and log prior probs:

```
Chain 1 -- -1620.166632 -- -3.810897
Chain 2 -- -2300.560644 -- -166.199913
Chain 3 -- -2156.594090 -- -129.082657
Chain 4 -- -2293.230285 -- -186.740403
```

Starting stepping-stone sampling to estimate marginal likelihood.

50 steps will be used with 1500 generations (3 samples) within each step.

Total of 76500 generations (153 samples) will be collected while first

1500 generations (3 samples) will be discarded as initial burnin.

Additionally at the beginning of each step 0 generations (0 samples)

will be discarded as burnin.

Sampling from posterior to prior, i.e. first step samples from close to posterior.

Chain results (76500 generations requested):

```
0 -- [-1620.167] (-2300.561) (-2156.594) (-2293.230)
```

Sampling step 1 out of 50 steps...

Sampling step 2 out of 50 steps...

Sampling step 3 out of 50 steps...

Sampling step 4 out of 50 steps...

Sampling step 5 out of 50 steps...

Sampling step 6 out of 50 steps...

```
10000 -- (-1031.570) (-1031.802) [-1018.638] (-1030.281) -- 0:00:39
```

Sampling step 7 out of 50 steps...

Sampling step 8 out of 50 steps...

Sampling step 9 out of 50 steps...

Sampling step 10 out of 50 steps...

Sampling step 11 out of 50 steps...

Sampling step 12 out of 50 steps...

Sampling step 13 out of 50 steps...

20000 -- (-1088.182) (-1143.689) (-1100.753) [-1091.231] -- 0:00:36  
Sampling step 14 out of 50 steps...

Sampling step 15 out of 50 steps...

Sampling step 16 out of 50 steps...

Sampling step 17 out of 50 steps...

Sampling step 18 out of 50 steps...

Sampling step 19 out of 50 steps...

30000 -- (-1158.099) (-1140.219) (-1239.290) [-1143.877] -- 0:00:29  
Sampling step 20 out of 50 steps...

Sampling step 21 out of 50 steps...

Sampling step 22 out of 50 steps...

Sampling step 23 out of 50 steps...

Sampling step 24 out of 50 steps...

Sampling step 25 out of 50 steps...

Sampling step 26 out of 50 steps...

40000 -- (-1374.730) [-1266.760] (-1340.195) (-1343.404) -- 0:00:22  
Sampling step 27 out of 50 steps...

Sampling step 28 out of 50 steps...

Sampling step 29 out of 50 steps...

Sampling step 30 out of 50 steps...

Sampling step 31 out of 50 steps...

Sampling step 32 out of 50 steps...

Sampling step 33 out of 50 steps...

50000 -- [-1335.118] (-1420.152) (-1393.019) (-1430.997) -- 0:00:16  
Sampling step 34 out of 50 steps...

Sampling step 35 out of 50 steps...

Sampling step 36 out of 50 steps...

Sampling step 37 out of 50 steps...

Sampling step 38 out of 50 steps...



```

|***** **** ***** **** ***** **** ***** **** ***** **** *****|
+-----+-----+-----+-----+-----+-----+-----+-----+-----+ 0.000
^
1
50

```

Acceptance rates for the moves in the "cold" chain:

|            |            |                                  |
|------------|------------|----------------------------------|
| With prob. | (last 100) | chain accepted proposals by move |
| 41.9 %     | ( 50 %)    | Multiplier(Alpha)                |
| 42.4 %     | ( 59 %)    | ExtSprClock(Tau,V)               |
| 77.5 %     | (100 %)    | NNIClock(Tau,V)                  |
| 33.5 %     | ( 35 %)    | ParsSPRClock(Tau,V)              |
| 85.7 %     | ( 95 %)    | NodesliderClock(V)               |
| 53.1 %     | ( 85 %)    | TreeStretch(V)                   |

Chain swap information:

|           | 1     | 2     | 3    | 4 |
|-----------|-------|-------|------|---|
| 1         | 0.21  | 0.05  | 0.02 |   |
| 2   12607 |       | 0.31  | 0.10 |   |
| 3   12680 | 12749 |       | 0.41 |   |
| 4   12875 | 12718 | 12871 |      |   |

Upper diagonal: Proportion of successful state exchanges between chains

Lower diagonal: Number of attempted state exchanges between chains

Chain information:

```

ID -- Heat
-----
1 -- 1.00 (cold chain)
2 -- 0.91
3 -- 0.83
4 -- 0.77

```

Heat = 1 / (1 + T \* (ID - 1))

(where T = 0.10 is the temperature and ID is the chain number)

MrBayes >

Last login: Thu Dec 26 10:15:42 on ttys000  
msicoli-m1:~ msicoli\$ mb

MrBayes v3.2.1 x64

(Bayesian Analysis of Phylogeny)

Distributed under the GNU General Public License

Type "help" or "help <command>" for information  
on the commands that are available.

Type "about" for authorship and general  
information about the program.

MrBayes > exe /Users/msicoli/DY-Typlogical\_binary\_bayes-2.nex

Executing file "/Users/msicoli/DY-Typlogical\_binary\_bayes-2.nex"

UNIX line termination

Longest line length = 123

Parsing file

Expecting NEXUS formatted file

Reading data block

Allocated taxon set

Allocated matrix

Defining new matrix with 40 taxa and 116 characters

Data is Standard

Missing data coded as ?

Gaps coded as -

Data matrix is not interleaved

Taxon 1 -> hax

Taxon 2 -> gwi

Taxon 3 -> dgr

Taxon 4 -> scsh

Taxon 5 -> xsl

Taxon 6 -> bea

Taxon 7 -> crx

Taxon 8 -> chp

Taxon 9 -> txc

Taxon 10 -> haa

Taxon 11 -> ing

Taxon 12 -> kuu

Taxon 13 -> hoi

Taxon 14 -> koy

Taxon 15 -> taa

Taxon 16 -> aht

Taxon 17 -> tfn

Taxon 18 -> kkz

Taxon 19 -> tcb

Taxon 20 -> tau

Taxon 21 -> ttmN

Taxon 22 -> tceS

Taxon 23 -> eya



```
Taxon 24 -> tli
Taxon 25 -> gce
Taxon 26 -> tol
Taxon 27 -> cco
Taxon 28 -> hup
Taxon 29 -> mtl
Taxon 30 -> wlk
Taxon 31 -> kto
Taxon 32 -> apc
Taxon 33 -> apw
Taxon 34 -> apj
Taxon 35 -> nav
Taxon 36 -> apk
Taxon 37 -> apl
Taxon 38 -> srs
Taxon 39 -> ket
Taxon 40 -> zko
Successfully read matrix
Setting default partition (does not divide up characters)
Setting model defaults
Seed (for generating default start values) = 1388074477
Adding dummy characters (unobserved site patterns) for division 1
WARNING: There are 26 characters incompatible with the specified
        coding bias. These characters will be excluded.
Setting output file names to "/Users/msicoli/DY-Typlogical_binary_bayes-2.nex.run<i>.<p|
```

t>"

```
Exiting data block
Reached end of file
```

```
MrBayes > lset nst=6 rates=gamma
```

```
Setting Rates to Gamma
Successfully set likelihood model parameters
Adding dummy characters (unobserved site patterns) for division 1
WARNING: There are 26 characters incompatible with the specified
        coding bias. These characters will be excluded.
```

```
MrBayes > prset brlenspr=clock:uniform
```

```
Setting Brlenspr to Clock:Uniform
Successfully set prior model parameters
Adding dummy characters (unobserved site patterns) for division 1
WARNING: There are 26 characters incompatible with the specified
        coding bias. These characters will be excluded.
```

```
MrBayes > outgroup 1
```

```
Setting outgroup to taxon "hax"
```

```
MrBayes > mcmcp ngen=2000000 printfreq=10000 samplefreq=500 nruns=1 nchains=4 savebrlens=yes
filename=DY-26Dec-strict-Hout2
```

```
Setting number of generations to 2000000
Setting print frequency to 10000
Setting sample frequency to 500
Setting number of runs to 1
```

Setting number of chains to 4  
Setting chain output file names to "DY-26Dec-strict-Hout2.<p/t>"  
Successfully set chain parameters

MrBayes > mcmc

Running Markov chain  
MCMC stamp = 5449400826  
Seed = 1134458959  
Swapseed = 1388074477  
Model settings:

Data not partitioned --  
Datatype = Standard  
Coding = Variable  
# States = Variable, up to 10  
State frequencies are fixed to be equal  
Rates = Gamma  
Gamma shape parameter is uniformly distributed on the interval (0.00,200.00).  
Gamma distribution is approximated using 4 categories.  
Likelihood summarized over all rate categories in each generation.

Active parameters:

Parameters  
-----  
Statefreq 1  
Shape 2  
Ratemultiplier 3  
Topology 4  
Brlens 5  
Clockrate 6  
-----

1 -- Parameter = Alpha\_symdir  
Type = Symmetric dirichlet/beta distribution alpha\_i parameter  
Prior = Symmetric dirichlet with fixed(-1.00) variance parameter

2 -- Parameter = Alpha  
Type = Shape of scaled gamma distribution of site rates  
Prior = Uniform(0.00,200.00)

3 -- Parameter = Ratemultiplier  
Type = Partition-specific rate multiplier  
Prior = Fixed(1.0)

4 -- Parameter = Tau  
Type = Topology  
Prior = All topologies equally probable a priori  
Subparam. = V

5 -- Parameter = V  
Type = Branch lengths  
Prior = Clock:Uniform  
Tree age has an Exponential(1.000) distribution

Node ages are not constrained

6 -- Parameter = Clockrate  
Type = Base rate of clock  
Prior = Fixed(1.000000)  
The clock rate is constant (strict clock)

Number of taxa = 40  
Number of characters = 116

The MCMC sampler will use the following moves:

With prob. Chain will use move  
2.38 % Multiplier(Alpha)  
11.90 % ExtSprClock(Tau,V)  
23.81 % NNIClock(Tau,V)  
11.90 % ParsSPRClock(Tau,V)  
47.62 % NodesliderClock(V)  
2.38 % TreeStretch(V)

Division 1 has 81 unique site patterns  
Initializing conditional likelihoods  
Using standard non-SSE likelihood calculator for division 1 (single-precision)

Initial log likelihoods and log prior probs:

Chain 1 -- -1722.625492 -- -93.249778  
Chain 2 -- -1718.765922 -- -93.249778  
Chain 3 -- -1763.021428 -- -93.249778  
Chain 4 -- -1699.399305 -- -93.249778

Chain results (2000000 generations requested):

0 -- [-1722.625] (-1718.766) (-1763.021) (-1699.399)  
10000 -- (-1014.497) [-1017.643] (-1026.649) (-1008.923) -- 0:19:54  
20000 -- (-1023.607) [-1013.409] (-1018.200) (-1008.476) -- 0:18:09  
30000 -- [-1009.691] (-1014.904) (-1004.985) (-1006.906) -- 0:17:30  
40000 -- (-1000.719) [-1010.092] (-1032.720) (-1021.775) -- 0:17:58  
50000 -- (-1007.770) (-1020.555) [-1002.901] (-1038.949) -- 0:17:33  
60000 -- [-1020.223] (-1009.007) (-1025.374) (-1003.929) -- 0:17:14  
70000 -- (-1015.731) [-1009.247] (-1022.190) (-1022.128) -- 0:17:27  
80000 -- (-1039.822) [-1021.826] (-1035.211) (-1000.508) -- 0:17:12  
90000 -- (-1004.443) (-1013.859) (-1030.251) [-1020.982] -- 0:16:58  
100000 -- (-1018.126) [-1004.591] (-1039.582) (-1022.379) -- 0:16:47  
110000 -- (-1017.186) [-1009.560] (-1012.467) (-1005.066) -- 0:16:36  
120000 -- (-1019.255) (-1025.618) [-1017.007] (-1016.738) -- 0:16:42  
130000 -- [-1006.890] (-1028.668) (-1031.914) (-1004.633) -- 0:16:32  
140000 -- (-1010.654) (-1015.918) [-1017.700] (-1013.347) -- 0:16:23  
150000 -- (-1010.203) [-1006.789] (-1017.817) (-1018.112) -- 0:16:14  
160000 -- [-1015.614] (-1019.639) (-1006.314) (-1025.479) -- 0:16:17  
170000 -- (-1008.275) (-1017.001) [-1015.255] (-1016.792) -- 0:16:08  
180000 -- (-1011.301) (-1012.343) [-1001.411] (-997.635) -- 0:16:00  
190000 -- (-1037.016) (-1049.374) (-1018.325) [-1007.851] -- 0:16:02  
200000 -- (-1023.995) (-1010.542) [-1000.898] (-1025.257) -- 0:15:54  
210000 -- (-1014.727) (-1008.522) [-1001.171] (-1016.649) -- 0:15:46  
220000 -- (-1018.374) (-1008.238) [-1005.388] (-1020.628) -- 0:15:46

230000 -- (-1014.622) [-1011.231] (-1009.556) (-1025.645) -- 0:15:38  
240000 -- (-1021.399) (-1013.098) (-1021.066) [-1002.608] -- 0:15:31  
250000 -- [-1009.901] (-1016.430) (-1015.178) (-1019.061) -- 0:15:24  
260000 -- [-1001.343] (-1018.803) (-1012.355) (-1012.520) -- 0:15:16  
270000 -- (-1025.207) (-1023.010) [-1006.626] (-995.819) -- 0:15:16  
280000 -- (-1014.451) (-1021.193) (-1021.774) [-1014.267] -- 0:15:09  
290000 -- (-1011.260) (-1005.571) [-1000.168] (-1010.005) -- 0:15:02  
300000 -- (-1019.810) (-1014.776) [-1017.279] (-1028.504) -- 0:14:55  
310000 -- [-1016.670] (-1012.246) (-1004.450) (-1008.476) -- 0:14:48  
320000 -- (-1012.119) (-1024.311) [-1002.453] (-1026.813) -- 0:14:47  
330000 -- (-1002.951) (-1011.099) [-1007.507] (-1004.218) -- 0:14:40  
340000 -- (-1018.460) [-1000.701] (-1019.192) (-1015.460) -- 0:14:33  
350000 -- (-1030.001) (-1016.537) (-1030.786) [-1020.008] -- 0:14:27  
360000 -- (-1014.125) (-1025.268) (-1015.349) [-997.903] -- 0:14:21  
370000 -- (-1006.544) (-1011.025) (-1010.609) [-1006.273] -- 0:14:19  
380000 -- (-1011.312) (-1012.179) (-1009.748) [-1009.483] -- 0:14:12  
390000 -- (-1008.134) (-1000.728) (-1038.844) [-998.146] -- 0:14:06  
400000 -- (-1008.622) [-1009.413] (-1031.074) (-1005.924) -- 0:14:00  
410000 -- [-1017.732] (-1008.041) (-1008.604) (-1026.424) -- 0:13:57  
420000 -- [-1009.748] (-1043.303) (-1032.086) (-1008.092) -- 0:13:55  
430000 -- [-1008.585] (-1024.107) (-1023.771) (-1009.831) -- 0:13:48  
440000 -- (-994.937) [-995.373] (-1023.578) (-1028.488) -- 0:13:42  
450000 -- (-1022.909) [-1029.937] (-1027.270) (-1005.861) -- 0:13:36  
460000 -- (-1010.687) [-1008.994] (-1011.370) (-1034.851) -- 0:13:33  
470000 -- (-1015.857) [-993.718] (-1041.442) (-1034.086) -- 0:13:27  
480000 -- (-1013.218) [-1007.604] (-1038.061) (-1043.153) -- 0:13:21  
490000 -- (-1012.241) [-1009.545] (-1029.787) (-1012.800) -- 0:13:18  
500000 -- (-1033.317) [-1005.032] (-1011.921) (-1024.422) -- 0:13:12  
510000 -- (-1025.198) [-1003.453] (-1019.197) (-1006.196) -- 0:13:05  
520000 -- (-1010.933) (-1033.139) (-1023.603) [-1013.213] -- 0:12:59  
530000 -- [-1005.216] (-1010.108) (-1019.806) (-1026.298) -- 0:12:53  
540000 -- (-1019.579) [-1000.290] (-1019.684) (-1035.709) -- 0:12:50  
550000 -- (-1017.249) [-1019.785] (-1024.485) (-1009.594) -- 0:12:44  
560000 -- (-1005.997) (-1017.492) (-1039.417) [-1008.990] -- 0:12:38  
570000 -- (-1027.129) (-1024.355) [-1013.148] (-1009.800) -- 0:12:32  
580000 -- (-1037.588) (-1009.415) (-1015.059) [-1004.082] -- 0:12:29  
590000 -- [-1019.528] (-1028.921) (-1020.814) (-1014.146) -- 0:12:23  
600000 -- (-1017.486) (-1010.667) (-1013.812) [-1002.857] -- 0:12:17  
610000 -- (-1019.989) (-1015.176) (-1030.724) [-1024.469] -- 0:12:11  
620000 -- (-1019.025) (-1019.801) (-1013.647) [-992.001] -- 0:12:07  
630000 -- (-1003.820) (-1035.340) (-1009.398) [-1003.366] -- 0:12:01  
640000 -- (-1007.256) (-1029.314) (-1034.223) [-1019.918] -- 0:11:56  
650000 -- (-1002.209) (-1012.760) (-1022.167) [-1012.788] -- 0:11:50  
660000 -- (-1017.339) (-1015.947) (-1006.872) [-1016.495] -- 0:11:46  
670000 -- (-1012.967) (-1024.409) [-1009.490] (-1007.301) -- 0:11:40  
680000 -- (-1014.410) [-1013.084] (-1020.691) (-1021.829) -- 0:11:34  
690000 -- (-1013.685) (-1013.432) (-1015.364) [-1027.233] -- 0:11:29  
700000 -- (-1012.444) (-1016.996) [-1007.776] (-1016.672) -- 0:11:25  
710000 -- (-1018.351) (-1016.554) (-1019.551) [-1013.677] -- 0:11:19  
720000 -- (-1010.182) (-1024.488) (-1017.271) [-1005.163] -- 0:11:13  
730000 -- [-1019.983] (-1015.347) (-1013.144) (-1027.756) -- 0:11:09  
740000 -- [-1012.556] (-1021.014) (-1013.157) (-1010.041) -- 0:11:04  
750000 -- [-1002.333] (-1042.517) (-1026.245) (-1002.412) -- 0:10:58  
760000 -- (-1014.582) [-1013.034] (-1041.131) (-1005.686) -- 0:10:52  
770000 -- (-1039.470) (-1004.469) (-1030.238) [-1007.420] -- 0:10:48  
780000 -- (-1009.201) (-1037.511) (-1025.141) [-1009.637] -- 0:10:42

790000 -- (-1016.466) (-1018.118) [-1003.285] (-1029.998) -- 0:10:38  
800000 -- (-1014.863) (-1009.890) [-1005.414] (-1005.042) -- 0:10:33  
810000 -- [-1025.364] (-1027.859) (-1027.980) (-1020.011) -- 0:10:28  
820000 -- [-1014.305] (-1014.964) (-1019.369) (-1002.666) -- 0:10:24  
830000 -- (-1014.827) (-1008.108) [-1002.654] (-1016.085) -- 0:10:20  
840000 -- (-1029.498) (-1012.174) [-1006.895] (-1024.971) -- 0:10:15  
850000 -- (-1013.892) (-1016.781) (-1016.324) [-1009.748] -- 0:10:11  
860000 -- (-1029.290) [-1003.779] (-1007.581) (-1016.285) -- 0:10:08  
870000 -- (-1024.128) [-1005.391] (-1025.886) (-1010.730) -- 0:10:03  
880000 -- (-1013.029) (-1009.380) [-1012.462] (-1009.819) -- 0:10:02  
890000 -- (-1026.780) (-1004.365) [-1011.945] (-1015.154) -- 0:09:59  
900000 -- (-1020.583) (-1024.687) (-1012.239) [-1028.622] -- 0:09:56  
910000 -- (-1024.604) (-1014.801) [-1007.021] (-1013.390) -- 0:09:51  
920000 -- (-1012.418) (-1015.645) [-1009.110] (-1035.222) -- 0:09:46  
930000 -- (-1019.296) [-1008.446] (-1022.754) (-1017.964) -- 0:09:42  
940000 -- [-1027.978] (-1021.167) (-1028.275) (-1011.273) -- 0:09:38  
950000 -- [-1002.200] (-1020.174) (-1020.285) (-1023.198) -- 0:09:33  
960000 -- (-1017.045) (-1011.769) [-996.005] (-996.040) -- 0:09:28  
970000 -- (-1012.987) (-1016.354) (-1015.832) [-1006.497] -- 0:09:24  
980000 -- (-1019.631) (-1009.587) (-1005.708) [-1020.112] -- 0:09:22  
990000 -- (-1031.461) [-1003.500] (-1015.792) (-1019.421) -- 0:09:16  
1000000 -- (-1006.903) [-999.303] (-1025.471) (-1017.260) -- 0:09:11  
1010000 -- (-1002.770) (-1015.160) [-1004.507] (-1011.023) -- 0:09:05  
1020000 -- (-1024.943) [-1008.650] (-1019.406) (-1013.561) -- 0:09:01  
1030000 -- [-1011.039] (-1021.357) (-1024.012) (-1002.341) -- 0:08:56  
1040000 -- [-998.166] (-1037.070) (-1019.062) (-1015.013) -- 0:08:50  
1050000 -- (-1024.994) (-1018.720) [-1012.092] (-1007.999) -- 0:08:45  
1060000 -- (-1017.209) (-1025.473) (-1011.543) [-998.992] -- 0:08:39  
1070000 -- (-1001.184) (-1031.488) (-1022.035) [-1011.884] -- 0:08:34  
1080000 -- [-999.890] (-1017.439) (-1006.941) (-1024.010) -- 0:08:28  
1090000 -- (-1021.220) (-1016.798) [-1004.127] (-1010.098) -- 0:08:23  
1100000 -- (-1028.519) (-1015.129) (-1017.016) [-1006.862] -- 0:08:19  
1110000 -- [-1008.586] (-1021.477) (-1007.312) (-1015.056) -- 0:08:13  
1120000 -- (-1022.880) (-1022.586) [-1016.760] (-1014.455) -- 0:08:10  
1130000 -- (-1022.089) (-1011.151) (-1013.911) [-1007.817] -- 0:08:04  
1140000 -- (-1011.862) (-1023.743) (-1023.192) [-1007.247] -- 0:07:59  
1150000 -- (-1008.716) (-1013.480) [-1015.629] (-1017.107) -- 0:07:53  
1160000 -- (-1026.803) [-1003.091] (-1022.967) (-1027.048) -- 0:07:47  
1170000 -- (-1036.550) [-1010.462] (-1018.270) (-1002.477) -- 0:07:41  
1180000 -- (-1035.019) (-1009.291) [-1011.227] (-1017.696) -- 0:07:35  
1190000 -- (-1003.703) (-1021.246) [-992.147] (-1022.614) -- 0:07:31  
1200000 -- [-1006.231] (-1010.943) (-1024.686) (-1006.088) -- 0:07:27  
1210000 -- (-1014.149) [-1006.125] (-1014.461) (-1021.700) -- 0:07:23  
1220000 -- (-1013.580) (-1011.293) [-1010.426] (-1013.179) -- 0:07:18  
1230000 -- (-1017.776) [-993.012] (-1017.211) (-1019.230) -- 0:07:13  
1240000 -- (-1003.576) (-1019.999) (-1023.753) [-1002.404] -- 0:07:08  
1250000 -- (-1014.268) (-1038.050) [-1004.300] (-1003.180) -- 0:07:03  
1260000 -- (-1012.634) (-1004.616) [-1006.035] (-1045.469) -- 0:06:57  
1270000 -- (-1020.266) (-1017.449) [-1019.072] (-1028.054) -- 0:06:52  
1280000 -- (-1028.537) [-1003.297] (-1039.640) (-1002.714) -- 0:06:46  
1290000 -- (-1016.104) (-1015.200) [-1003.932] (-1016.838) -- 0:06:41  
1300000 -- (-1015.873) (-1037.335) (-1006.258) [-1009.561] -- 0:06:35  
1310000 -- (-1023.971) (-1009.974) [-1000.289] (-1015.560) -- 0:06:30  
1320000 -- (-1033.882) [-1003.444] (-1009.753) (-1023.020) -- 0:06:24  
1330000 -- (-1033.917) [-1014.760] (-1008.434) (-1039.305) -- 0:06:19  
1340000 -- (-1006.140) [-1014.717] (-1017.292) (-1012.027) -- 0:06:13

1350000 -- (-1011.184) (-1015.369) [-1002.331] (-997.588) -- 0:06:08  
1360000 -- (-1026.054) (-1015.572) [-1009.717] (-1021.713) -- 0:06:02  
1370000 -- [-1007.505] (-1016.394) (-1017.961) (-1007.594) -- 0:05:57  
1380000 -- (-1022.354) (-1006.005) [-1013.648] (-1017.233) -- 0:05:51  
1390000 -- (-1008.898) (-1015.117) (-1006.989) [-1007.117] -- 0:05:47  
1400000 -- (-1008.579) (-1015.636) [-1007.892] (-1030.924) -- 0:05:41  
1410000 -- (-1012.460) [-1009.506] (-1012.407) (-1016.835) -- 0:05:36  
1420000 -- [-1019.580] (-1016.090) (-1013.985) (-1011.427) -- 0:05:30  
1430000 -- [-1006.685] (-1017.280) (-1011.769) (-1010.057) -- 0:05:25  
1440000 -- (-1016.079) (-1014.731) (-1004.142) [-994.172] -- 0:05:19  
1450000 -- [-1012.352] (-1031.939) (-1020.686) (-1012.811) -- 0:05:14  
1460000 -- (-1012.028) (-1024.041) (-1019.289) [-1006.290] -- 0:05:08  
1470000 -- (-1019.205) [-1009.648] (-1018.238) (-1008.048) -- 0:05:03  
1480000 -- (-1018.225) [-1012.728] (-1029.428) (-1000.139) -- 0:04:57  
1490000 -- (-1014.965) [-1009.722] (-1025.361) (-1030.039) -- 0:04:52  
1500000 -- (-1033.445) (-1038.528) (-1016.186) [-1003.708] -- 0:04:46  
1510000 -- (-1007.107) (-1013.430) [-1018.213] (-1007.367) -- 0:04:41  
1520000 -- [-1002.590] (-1026.793) (-1008.335) (-1010.402) -- 0:04:35  
1530000 -- (-1024.057) [-1004.905] (-1015.341) (-1009.141) -- 0:04:29  
1540000 -- [-1005.775] (-1020.795) (-1016.775) (-998.706) -- 0:04:24  
1550000 -- (-1011.082) (-1023.640) [-1001.394] (-1019.481) -- 0:04:18  
1560000 -- (-1020.186) (-1053.092) [-1017.984] (-1013.622) -- 0:04:12  
1570000 -- (-1009.287) (-1029.065) [-1016.064] (-1012.643) -- 0:04:07  
1580000 -- [-1008.630] (-1017.484) (-1002.180) (-1017.557) -- 0:04:01  
1590000 -- [-1010.918] (-1032.854) (-1018.106) (-1003.309) -- 0:03:55  
1600000 -- (-1033.674) (-1024.527) [-1015.395] (-998.339) -- 0:03:50  
1610000 -- (-1011.190) [-1015.395] (-1041.313) (-1008.084) -- 0:03:44  
1620000 -- [-1005.289] (-1023.030) (-1006.672) (-1022.442) -- 0:03:38  
1630000 -- (-1027.760) [-1012.656] (-1035.150) (-1006.086) -- 0:03:33  
1640000 -- (-1006.304) [-1010.373] (-1005.114) (-1028.728) -- 0:03:27  
1650000 -- (-1007.852) (-1021.388) [-1005.000] (-1022.408) -- 0:03:21  
1660000 -- (-1006.677) (-1021.786) [-1013.038] (-1019.849) -- 0:03:16  
1670000 -- (-1007.426) [-1003.562] (-1015.111) (-1024.981) -- 0:03:10  
1680000 -- [-1008.550] (-1019.964) (-1021.046) (-1019.105) -- 0:03:04  
1690000 -- (-1027.676) [-1027.736] (-1029.223) (-1014.990) -- 0:02:59  
1700000 -- [-1004.450] (-1020.914) (-1017.062) (-1009.281) -- 0:02:53  
1710000 -- (-1011.764) (-1005.248) (-1005.678) [-996.778] -- 0:02:47  
1720000 -- [-1005.713] (-1026.591) (-1005.158) (-1013.104) -- 0:02:41  
1730000 -- [-1014.851] (-1022.463) (-1001.089) (-1021.421) -- 0:02:36  
1740000 -- (-1017.310) (-1036.472) [-1001.289] (-1014.162) -- 0:02:30  
1750000 -- [-1020.465] (-1008.300) (-1015.938) (-1019.812) -- 0:02:24  
1760000 -- (-1017.193) [-1001.525] (-1028.825) (-1019.178) -- 0:02:18  
1770000 -- (-1023.535) [-999.780] (-1013.175) (-1017.314) -- 0:02:12  
1780000 -- (-1039.640) (-1019.189) [-1017.200] (-1012.867) -- 0:02:06  
1790000 -- (-1013.331) [-1008.762] (-1004.943) (-1032.596) -- 0:02:01  
1800000 -- (-1022.281) [-1002.268] (-1013.067) (-1009.214) -- 0:01:55  
1810000 -- (-1013.634) [-1019.998] (-1008.382) (-1016.517) -- 0:01:49  
1820000 -- (-1009.430) [-1007.118] (-1043.366) (-1031.810) -- 0:01:43  
1830000 -- (-1023.136) (-1003.273) [-1005.204] (-1005.465) -- 0:01:37  
1840000 -- (-1031.059) [-1002.310] (-1019.906) (-1016.444) -- 0:01:32  
1850000 -- (-1022.153) [-1006.872] (-1015.255) (-1019.787) -- 0:01:26  
1860000 -- [-1004.272] (-1029.433) (-1012.534) (-1002.912) -- 0:01:20  
1870000 -- (-1034.550) (-1018.303) [-1002.689] (-1011.167) -- 0:01:14  
1880000 -- (-1023.759) (-1019.318) [-995.984] (-1013.254) -- 0:01:08  
1890000 -- [-1002.934] (-1012.205) (-1013.271) (-1006.149) -- 0:01:03  
1900000 -- [-1009.840] (-1022.766) (-1023.288) (-1028.966) -- 0:00:57

```

1910000 -- (-1008.129) (-1026.136) [-1006.252] (-1012.397) -- 0:00:51
1920000 -- (-1006.634) (-1026.334) [-1007.913] (-1007.945) -- 0:00:45
1930000 -- (-1011.529) (-1015.872) (-1021.593) [-1014.711] -- 0:00:40
1940000 -- [-1013.537] (-1027.924) (-1007.607) (-1033.956) -- 0:00:34
1950000 -- (-1011.710) [-1006.317] (-1028.062) (-1005.585) -- 0:00:28
1960000 -- (-1007.740) (-1023.011) (-1034.228) [-995.187] -- 0:00:22
1970000 -- (-1003.515) (-1010.789) (-1018.642) [-1008.914] -- 0:00:17
1980000 -- [-1007.155] (-1017.143) (-1034.538) (-1008.662) -- 0:00:11
1990000 -- [-1018.314] (-1012.037) (-1021.902) (-1016.872) -- 0:00:05
2000000 -- (-1007.355) [-1001.127] (-1009.912) (-1020.594) -- 0:00:00

```

Continue with analysis? (yes/no): n

Analysis completed in 19 mins 5 seconds

Analysis used 1054.63 seconds of CPU time

Log likelihood of best state for "cold" chain was -985.06

Acceptance rates for the moves in the "cold" chain:

| With prob. | (last 100) | chain accepted proposals by move |
|------------|------------|----------------------------------|
| 34.3 %     | ( 16 %)    | Multiplier(Alpha)                |
| 19.0 %     | ( 26 %)    | ExtSprClock(Tau,V)               |
| 44.9 %     | ( 35 %)    | NNIClock(Tau,V)                  |
| 15.6 %     | ( 16 %)    | ParsSPRClock(Tau,V)              |
| 70.3 %     | ( 74 %)    | NodesliderClock(V)               |
| 71.0 %     | ( 32 %)    | TreeStretch(V)                   |

Chain swap information:

|   | 1      | 2      | 3      | 4    |
|---|--------|--------|--------|------|
| 1 |        | 0.45   | 0.19   | 0.07 |
| 2 | 332602 |        | 0.56   | 0.27 |
| 3 | 334113 | 333671 |        | 0.60 |
| 4 | 333117 | 332681 | 333816 |      |

Upper diagonal: Proportion of successful state exchanges between chains

Lower diagonal: Number of attempted state exchanges between chains

Chain information:

```

ID -- Heat
-----
1 -- 1.00 (cold chain)
2 -- 0.91
3 -- 0.83
4 -- 0.77

```

Heat = 1 / (1 + T \* (ID - 1))

(where T = 0.10 is the temperature and ID is the chain number)

MrBayes > sumt relburnin=yes

Using relative burnin (a fraction of samples discarded).

Summarizing trees in file "DY-26Dec-strict-Hout2.t"

Using relative burnin ('relburnin=yes'), discarding the first 25 % of sampled trees

Writing statistics to files DY-26Dec-strict-Hout2.<parts|tstat|vstat|trprobs|con>  
Examining file ...  
Found one tree block in file "DY-26Dec-strict-Hout2.t" with 4001 trees in last block

Tree reading status:

```
0      10      20      30      40      50      60      70      80      90      100
v-----v-----v-----v-----v-----v-----v-----v-----v-----v-----v
*****
```

Read 4001 trees from last tree block (sampling 3001 of them)

General explanation:

In an unrooted tree, a taxon bipartition (split) is specified by removing a branch, thereby dividing the species into those to the left and those to the right of the branch. Here, taxa to one side of the removed branch are denoted '.' and those to the other side are denoted '\*'. Specifically, the '.' symbol is used for the taxa on the same side as the outgroup.

In a rooted or clock tree, the tree is rooted using the model and not by reference to an outgroup. Each bipartition therefore corresponds to a clade, that is, a group that includes all the descendants of a particular branch in the tree. Taxa that are included in each clade are denoted using '\*', and taxa that are not included are denoted using the '.' symbol.

The output first includes a key to all the bipartitions with frequency larger or equal to (Minpartfreq) in at least one run. Minpartfreq is a parameter to sumt command and currently it is set to 0.10. This is followed by a table with statistics for the informative bipartitions (those including at least two taxa), sorted from highest to lowest probability. For each bipartition, the table gives the number of times the partition or split was observed in all runs (#obs) and the posterior probability of the bipartition (Probab.), which is the same as the split frequency. If several runs are summarized, this is followed by the minimum split frequency (Min(s)), the maximum frequency (Max(s)), and the standard deviation of frequencies (Stddev(s)) across runs. The latter value should approach 0 for all bipartitions as MCMC runs converge.

This is followed by a table summarizing branch lengths, node heights (if a clock model was used) and relaxed clock parameters (if a relaxed clock model was used). The mean, variance, and 95 % credible interval are given for each of these parameters. If several runs are summarized, the potential scale reduction factor (PSRF) is also given; it should approach 1 as runs converge. Node heights will take calibration points into account, if such points were used in the analysis.

Note that Stddev may be unreliable if the partition is not present in all runs (the last column indicates the number of runs that sampled the partition if more than one run is summarized). The PSRF is not calculated at all if the partition is not present in all runs. The PSRF is also sensitive to small sample sizes and it should only be considered a rough guide to convergence since some of the assumptions allowing one to interpret it as a true potential scale reduction factor are violated in MrBayes.

List of taxa in bipartitions:



```

1 -- hax
2 -- gwi
3 -- dgr
4 -- scsh
5 -- xsl
6 -- bea
7 -- crx
8 -- chp
9 -- txc
10 -- haa
11 -- ing
12 -- kuu
13 -- hoi
14 -- koy
15 -- taa
16 -- aht
17 -- tfn
18 -- kkz
19 -- tcb
20 -- tau
21 -- ttmN
22 -- tceS
23 -- eya
24 -- tli
25 -- gce
26 -- tol
27 -- cco
28 -- hup
29 -- mtl
30 -- wlk
31 -- kto
32 -- apc
33 -- apw
34 -- apj
35 -- nav
36 -- apk
37 -- apl
38 -- srs
39 -- ket
40 -- zko

```

Key to taxon bipartitions (saved to file "DY-26Dec-strict-Hout2.parts"):

```

ID -- Partition
-----
0 -- *****
1 -- *.....
2 -- .*.....
3 -- ..*.....
4 -- ...*.....
5 -- ....*.....
6 -- .....*.....
7 -- .....*.....
8 -- .....*.....
9 -- .....*.....
10 -- .....*.....

```

```
11 -- ..... * .....
12 -- ..... * .....
13 -- ..... * .....
14 -- ..... * .....
15 -- ..... * .....
16 -- ..... * .....
17 -- ..... * .....
18 -- ..... * .....
19 -- ..... * .....
20 -- ..... * .....
21 -- ..... * .....
22 -- ..... * .....
23 -- ..... * .....
24 -- ..... * .....
25 -- ..... * .....
26 -- ..... * .....
27 -- ..... * .....
28 -- ..... * .....
29 -- ..... * .....
30 -- ..... * .....
31 -- ..... * .....
32 -- ..... * .....
33 -- ..... * .....
34 -- ..... * .....
35 -- ..... * .....
36 -- ..... * .....
37 -- ..... * .....
38 -- ..... * .....
39 -- ..... * .....
40 -- ..... * .....
41 -- ..... ** .....
42 -- ..... ** .....
43 -- ..... ***** .....
44 -- ..... ***** .....
45 -- ..... * ** .....
46 -- ..... ** .....
47 -- ..... * ** .....
48 -- ..... ***** .....
49 -- ..... ***** .....
50 -- ***** ***** .....
51 -- *** ** .....
52 -- ..... *** .....
53 -- ..... * * * * * .....
54 -- ..... * * * .....
55 -- ..... * .....
56 -- ..... * .....
57 -- ..... ** .....
58 -- ..... ** .....
59 -- ..... ** .....
60 -- ..... * * * * * .....
61 -- ..... * * .....
62 -- ..... * * .....
63 -- ..... * * * .....
64 -- ..... * * * * * .....
65 -- ..... * * .....
66 -- ..... ** .....
```

```

67 -- .....**
68 -- **.....
69 -- *.....**
70 -- .....****
71 -- ..*.***.***.***.***.***
72 -- .....**
73 -- **.....
74 -- *****
75 -- .....******
76 -- .....***.....**
77 -- ..*.*
78 -- ..**
79 -- .....**
80 -- *.....*
81 -- .....*.*
82 -- *****
83 -- ..*.*.*
84 -- .....**.*
85 -- .....*.***.*
86 -- *****
87 -- .....*.*
88 -- ..**.*
89 -- .....**.*
90 -- .....**
91 -- ..**
92 -- *****
93 -- **.*
94 -- *******.***.*
95 -- .....*.*
96 -- ..*.*.***
97 -- .....*.*
98 -- *****
99 -- .....***
100 -- *.....**.***.*
101 -- ******.***.***.*
102 -- .....*.*
103 -- .....*.*
104 -- .....*.*
105 -- ***
106 -- *****
107 -- *.....****
108 -- .....*.*
109 -- *.....******
110 -- .....*.*
111 -- .....**.*
112 -- .....**.*
113 -- .....*.*
114 -- .....*.***
115 -- .....*.*
116 -- .....*.***
117 -- .....*.*.*
118 -- .....*.***
119 -- .....****.*
-----

```

Summary statistics for informative taxon bipartitions (clades)

(saved to file "DY-26Dec-strict-Hout2.tstat"):

| ID | #obs | Probab.  |
|----|------|----------|
| 41 | 3001 | 1.000000 |
| 42 | 2997 | 0.998667 |
| 43 | 2776 | 0.925025 |
| 44 | 2616 | 0.871709 |
| 45 | 2564 | 0.854382 |
| 46 | 2527 | 0.842053 |
| 47 | 2441 | 0.813396 |
| 48 | 2250 | 0.749750 |
| 49 | 2241 | 0.746751 |
| 50 | 2238 | 0.745751 |
| 51 | 2118 | 0.705765 |
| 52 | 2043 | 0.680773 |
| 53 | 1984 | 0.661113 |
| 54 | 1836 | 0.611796 |
| 55 | 1826 | 0.608464 |
| 56 | 1789 | 0.596135 |
| 57 | 1760 | 0.586471 |
| 58 | 1758 | 0.585805 |
| 59 | 1695 | 0.564812 |
| 60 | 1588 | 0.529157 |
| 61 | 1586 | 0.528491 |
| 62 | 1583 | 0.527491 |
| 63 | 1572 | 0.523825 |
| 64 | 1448 | 0.482506 |
| 65 | 1406 | 0.468510 |
| 66 | 1289 | 0.429523 |
| 67 | 1202 | 0.400533 |
| 68 | 1170 | 0.389870 |
| 69 | 1067 | 0.355548 |
| 70 | 1066 | 0.355215 |
| 71 | 1053 | 0.350883 |
| 72 | 941  | 0.313562 |
| 73 | 931  | 0.310230 |
| 74 | 924  | 0.307897 |
| 75 | 921  | 0.306898 |
| 76 | 880  | 0.293236 |
| 77 | 806  | 0.268577 |
| 78 | 801  | 0.266911 |
| 79 | 783  | 0.260913 |
| 80 | 731  | 0.243585 |
| 81 | 730  | 0.243252 |
| 82 | 660  | 0.219927 |
| 83 | 658  | 0.219260 |
| 84 | 654  | 0.217927 |
| 85 | 637  | 0.212263 |
| 86 | 580  | 0.193269 |
| 87 | 580  | 0.193269 |
| 88 | 555  | 0.184938 |
| 89 | 555  | 0.184938 |
| 90 | 555  | 0.184938 |
| 91 | 552  | 0.183939 |
| 92 | 551  | 0.183605 |

|     |     |          |
|-----|-----|----------|
| 93  | 529 | 0.176275 |
| 94  | 520 | 0.173276 |
| 95  | 518 | 0.172609 |
| 96  | 506 | 0.168610 |
| 97  | 503 | 0.167611 |
| 98  | 487 | 0.162279 |
| 99  | 460 | 0.153282 |
| 100 | 456 | 0.151949 |
| 101 | 443 | 0.147617 |
| 102 | 430 | 0.143286 |
| 103 | 412 | 0.137288 |
| 104 | 410 | 0.136621 |
| 105 | 397 | 0.132289 |
| 106 | 385 | 0.128291 |
| 107 | 377 | 0.125625 |
| 108 | 373 | 0.124292 |
| 109 | 369 | 0.122959 |
| 110 | 368 | 0.122626 |
| 111 | 356 | 0.118627 |
| 112 | 356 | 0.118627 |
| 113 | 355 | 0.118294 |
| 114 | 352 | 0.117294 |
| 115 | 350 | 0.116628 |
| 116 | 335 | 0.111629 |
| 117 | 333 | 0.110963 |
| 118 | 310 | 0.103299 |
| 119 | 304 | 0.101300 |

-----

Summary statistics for branch and node parameters  
(saved to file "DY-26Dec-strict-Hout2.vstat"):

| Parameter  | Mean     | Variance | 95% HPD Interval |          | Median   |
|------------|----------|----------|------------------|----------|----------|
|            |          |          | Lower            | Upper    |          |
| length[1]  | 0.114690 | 0.001561 | 0.046758         | 0.189851 | 0.112184 |
| length[2]  | 0.037719 | 0.000299 | 0.009372         | 0.071696 | 0.034830 |
| length[3]  | 0.038457 | 0.000364 | 0.009583         | 0.079175 | 0.034806 |
| length[4]  | 0.033569 | 0.000275 | 0.007822         | 0.065881 | 0.030545 |
| length[5]  | 0.026235 | 0.000179 | 0.004924         | 0.052110 | 0.023775 |
| length[6]  | 0.033752 | 0.000470 | 0.003749         | 0.078995 | 0.028476 |
| length[7]  | 0.025887 | 0.000182 | 0.004309         | 0.051382 | 0.023730 |
| length[8]  | 0.034227 | 0.000205 | 0.010211         | 0.062754 | 0.032086 |
| length[9]  | 0.077158 | 0.000804 | 0.027178         | 0.132055 | 0.075157 |
| length[10] | 0.037659 | 0.000207 | 0.012679         | 0.065648 | 0.036050 |
| length[11] | 0.038082 | 0.000362 | 0.007724         | 0.074951 | 0.034214 |
| length[12] | 0.062372 | 0.000733 | 0.014161         | 0.113485 | 0.059574 |
| length[13] | 0.027903 | 0.000186 | 0.005500         | 0.054491 | 0.025951 |
| length[14] | 0.028521 | 0.000198 | 0.006827         | 0.057731 | 0.026316 |
| length[15] | 0.021910 | 0.000167 | 0.002753         | 0.047922 | 0.019282 |
| length[16] | 0.076915 | 0.000842 | 0.026595         | 0.131616 | 0.072972 |
| length[17] | 0.072553 | 0.000779 | 0.026308         | 0.127393 | 0.069223 |
| length[18] | 0.028093 | 0.000201 | 0.005710         | 0.056587 | 0.025475 |
| length[19] | 0.019343 | 0.000128 | 0.002314         | 0.041904 | 0.016640 |
| length[20] | 0.023942 | 0.000180 | 0.004196         | 0.051066 | 0.021459 |

|            |          |          |          |          |          |
|------------|----------|----------|----------|----------|----------|
| length[21] | 0.026523 | 0.000150 | 0.006277 | 0.050705 | 0.024866 |
| length[22] | 0.028194 | 0.000166 | 0.006379 | 0.053605 | 0.026544 |
| length[23] | 0.089763 | 0.001185 | 0.028842 | 0.155279 | 0.084992 |
| length[24] | 0.097726 | 0.001500 | 0.032100 | 0.169992 | 0.092044 |
| length[25] | 0.065260 | 0.000779 | 0.019843 | 0.120791 | 0.061391 |
| length[26] | 0.055730 | 0.000580 | 0.015464 | 0.100974 | 0.051400 |
| length[27] | 0.063306 | 0.000726 | 0.018758 | 0.115970 | 0.058863 |
| length[28] | 0.081304 | 0.001142 | 0.024979 | 0.147505 | 0.076382 |
| length[29] | 0.064301 | 0.000801 | 0.016244 | 0.116733 | 0.060134 |
| length[30] | 0.034788 | 0.000324 | 0.006890 | 0.068988 | 0.031184 |
| length[31] | 0.035213 | 0.000354 | 0.006197 | 0.071030 | 0.031235 |
| length[32] | 0.006951 | 0.000043 | 0.000009 | 0.020028 | 0.004990 |
| length[33] | 0.006800 | 0.000040 | 0.000009 | 0.019794 | 0.004962 |
| length[34] | 0.011398 | 0.000064 | 0.000352 | 0.026904 | 0.009724 |
| length[35] | 0.022444 | 0.000132 | 0.005222 | 0.045708 | 0.020115 |
| length[36] | 0.004342 | 0.000022 | 0.000000 | 0.013039 | 0.002807 |
| length[37] | 0.004345 | 0.000023 | 0.000000 | 0.013039 | 0.002807 |
| length[38] | 0.051479 | 0.000481 | 0.014390 | 0.093336 | 0.048531 |
| length[39] | 0.059751 | 0.000504 | 0.022647 | 0.103790 | 0.057580 |
| length[40] | 0.059751 | 0.000504 | 0.022647 | 0.103790 | 0.057580 |
| length[41] | 0.070885 | 0.000721 | 0.025591 | 0.122416 | 0.067885 |
| length[42] | 0.030203 | 0.000211 | 0.006118 | 0.059235 | 0.028214 |
| length[43] | 0.035030 | 0.000369 | 0.002052 | 0.072378 | 0.032108 |
| length[44] | 0.015472 | 0.000122 | 0.000267 | 0.037439 | 0.012855 |
| length[45] | 0.021505 | 0.000167 | 0.000419 | 0.045781 | 0.018992 |
| length[46] | 0.030395 | 0.000409 | 0.000094 | 0.069053 | 0.026526 |
| length[47] | 0.024819 | 0.000283 | 0.000465 | 0.060492 | 0.021054 |
| length[48] | 0.041246 | 0.000626 | 0.000054 | 0.087436 | 0.037724 |
| length[49] | 0.021246 | 0.000239 | 0.000097 | 0.050454 | 0.018013 |
| length[50] | 0.021798 | 0.000172 | 0.000910 | 0.046751 | 0.019361 |
| length[51] | 0.021060 | 0.000245 | 0.000023 | 0.051507 | 0.017708 |
| length[52] | 0.012227 | 0.000093 | 0.000005 | 0.031174 | 0.010038 |
| length[53] | 0.016983 | 0.000104 | 0.000048 | 0.036030 | 0.015111 |
| length[54] | 0.032612 | 0.000527 | 0.000060 | 0.076564 | 0.027509 |
| length[55] | 0.015789 | 0.000111 | 0.000004 | 0.036111 | 0.013879 |
| length[56] | 0.009842 | 0.000062 | 0.000005 | 0.025727 | 0.007865 |
| length[57] | 0.015909 | 0.000148 | 0.000041 | 0.039271 | 0.013159 |
| length[58] | 0.040801 | 0.000650 | 0.000190 | 0.089050 | 0.037102 |
| length[59] | 0.021012 | 0.000230 | 0.000007 | 0.049674 | 0.018149 |
| length[60] | 0.014023 | 0.000094 | 0.000093 | 0.032587 | 0.012137 |
| length[61] | 0.010117 | 0.000071 | 0.000005 | 0.026398 | 0.007941 |
| length[62] | 0.028288 | 0.000347 | 0.000063 | 0.062623 | 0.024674 |
| length[63] | 0.009801 | 0.000050 | 0.000051 | 0.023250 | 0.008030 |
| length[64] | 0.023673 | 0.000194 | 0.001482 | 0.051344 | 0.021431 |
| length[65] | 0.028735 | 0.000408 | 0.000005 | 0.066771 | 0.024481 |
| length[66] | 0.010704 | 0.000077 | 0.000003 | 0.027257 | 0.008682 |
| length[67] | 0.028777 | 0.000400 | 0.000086 | 0.068514 | 0.025368 |
| length[68] | 0.018480 | 0.000166 | 0.000468 | 0.043841 | 0.015597 |
| length[69] | 0.021364 | 0.000231 | 0.000039 | 0.049665 | 0.018736 |
| length[70] | 0.026802 | 0.000354 | 0.000425 | 0.065570 | 0.022725 |
| length[71] | 0.019790 | 0.000115 | 0.002908 | 0.041277 | 0.017915 |
| length[72] | 0.011833 | 0.000123 | 0.000021 | 0.033207 | 0.008391 |
| length[73] | 0.017745 | 0.000152 | 0.000013 | 0.042564 | 0.015125 |
| length[74] | 0.012165 | 0.000083 | 0.000085 | 0.030510 | 0.010059 |
| length[75] | 0.015644 | 0.000112 | 0.000243 | 0.034374 | 0.014219 |
| length[76] | 0.017258 | 0.000156 | 0.000018 | 0.041698 | 0.014182 |

|             |          |          |          |          |          |
|-------------|----------|----------|----------|----------|----------|
| length[77]  | 0.015887 | 0.000151 | 0.000005 | 0.039879 | 0.012950 |
| length[78]  | 0.015930 | 0.000168 | 0.000015 | 0.040396 | 0.012838 |
| length[79]  | 0.022179 | 0.000282 | 0.000103 | 0.052978 | 0.018689 |
| length[80]  | 0.029266 | 0.000479 | 0.000008 | 0.070831 | 0.025023 |
| length[81]  | 0.009888 | 0.000091 | 0.000009 | 0.027921 | 0.007263 |
| length[82]  | 0.009709 | 0.000090 | 0.000008 | 0.029636 | 0.006715 |
| length[83]  | 0.007901 | 0.000058 | 0.000004 | 0.023411 | 0.005605 |
| length[84]  | 0.022325 | 0.000382 | 0.000005 | 0.061856 | 0.016491 |
| length[85]  | 0.015775 | 0.000154 | 0.000026 | 0.039717 | 0.012779 |
| length[86]  | 0.012277 | 0.000105 | 0.000010 | 0.030884 | 0.009944 |
| length[87]  | 0.006579 | 0.000043 | 0.000004 | 0.019482 | 0.004637 |
| length[88]  | 0.016522 | 0.000134 | 0.000055 | 0.038879 | 0.014046 |
| length[89]  | 0.005722 | 0.000029 | 0.000005 | 0.016330 | 0.004049 |
| length[90]  | 0.006533 | 0.000042 | 0.000016 | 0.020109 | 0.004647 |
| length[91]  | 0.014065 | 0.000161 | 0.000033 | 0.038443 | 0.010886 |
| length[92]  | 0.011984 | 0.000080 | 0.000083 | 0.029067 | 0.009958 |
| length[93]  | 0.015576 | 0.000158 | 0.000026 | 0.041743 | 0.012752 |
| length[94]  | 0.013541 | 0.000120 | 0.000032 | 0.034062 | 0.011075 |
| length[95]  | 0.006407 | 0.000041 | 0.000010 | 0.018694 | 0.004690 |
| length[96]  | 0.006124 | 0.000037 | 0.000006 | 0.017777 | 0.004591 |
| length[97]  | 0.017060 | 0.000228 | 0.000075 | 0.044928 | 0.013024 |
| length[98]  | 0.013056 | 0.000122 | 0.000050 | 0.034693 | 0.010835 |
| length[99]  | 0.012244 | 0.000131 | 0.000037 | 0.034026 | 0.008806 |
| length[100] | 0.007126 | 0.000041 | 0.000013 | 0.018698 | 0.005381 |
| length[101] | 0.014644 | 0.000109 | 0.000023 | 0.035127 | 0.012685 |
| length[102] | 0.019280 | 0.000253 | 0.000022 | 0.052568 | 0.015649 |
| length[103] | 0.019626 | 0.000186 | 0.000300 | 0.046315 | 0.016683 |
| length[104] | 0.006156 | 0.000038 | 0.000001 | 0.018551 | 0.004179 |
| length[105] | 0.010207 | 0.000130 | 0.000018 | 0.031294 | 0.006259 |
| length[106] | 0.007271 | 0.000046 | 0.000005 | 0.020715 | 0.005171 |
| length[107] | 0.017070 | 0.000157 | 0.000160 | 0.041097 | 0.014082 |
| length[108] | 0.014143 | 0.000093 | 0.000066 | 0.031639 | 0.012650 |
| length[109] | 0.009321 | 0.000073 | 0.000074 | 0.026634 | 0.007065 |
| length[110] | 0.020725 | 0.000345 | 0.000072 | 0.060340 | 0.015990 |
| length[111] | 0.014317 | 0.000141 | 0.000082 | 0.038873 | 0.010755 |
| length[112] | 0.004615 | 0.000027 | 0.000003 | 0.015539 | 0.002859 |
| length[113] | 0.016750 | 0.000203 | 0.000074 | 0.045753 | 0.012514 |
| length[114] | 0.008107 | 0.000054 | 0.000020 | 0.021533 | 0.006378 |
| length[115] | 0.006998 | 0.000049 | 0.000007 | 0.020890 | 0.005173 |
| length[116] | 0.005152 | 0.000033 | 0.000006 | 0.014949 | 0.003368 |
| length[117] | 0.017478 | 0.000217 | 0.000188 | 0.048083 | 0.013133 |
| length[118] | 0.013844 | 0.000123 | 0.000041 | 0.036865 | 0.011630 |
| length[119] | 0.025956 | 0.000306 | 0.000303 | 0.060228 | 0.021317 |
| height[0]   | 0.143615 | 0.001725 | 0.068256 | 0.212151 | 0.147314 |
| height[1]   | 0.000000 | 0.000000 | 0.000000 | 0.000000 | 0.000000 |
| height[2]   | 0.000000 | 0.000000 | 0.000000 | 0.000000 | 0.000000 |
| height[3]   | 0.000000 | 0.000000 | 0.000000 | 0.000000 | 0.000000 |
| height[4]   | 0.000000 | 0.000000 | 0.000000 | 0.000000 | 0.000000 |
| height[5]   | 0.000000 | 0.000000 | 0.000000 | 0.000000 | 0.000000 |
| height[6]   | 0.000000 | 0.000000 | 0.000000 | 0.000000 | 0.000000 |
| height[7]   | 0.000000 | 0.000000 | 0.000000 | 0.000000 | 0.000000 |
| height[8]   | 0.000000 | 0.000000 | 0.000000 | 0.000000 | 0.000000 |
| height[9]   | 0.000000 | 0.000000 | 0.000000 | 0.000000 | 0.000000 |
| height[10]  | 0.000000 | 0.000000 | 0.000000 | 0.000000 | 0.000000 |
| height[11]  | 0.000000 | 0.000000 | 0.000000 | 0.000000 | 0.000000 |
| height[12]  | 0.000000 | 0.000000 | 0.000000 | 0.000000 | 0.000000 |

|            |          |          |          |          |          |
|------------|----------|----------|----------|----------|----------|
| height[13] | 0.000000 | 0.000000 | 0.000000 | 0.000000 | 0.000000 |
| height[14] | 0.000000 | 0.000000 | 0.000000 | 0.000000 | 0.000000 |
| height[15] | 0.000000 | 0.000000 | 0.000000 | 0.000000 | 0.000000 |
| height[16] | 0.000000 | 0.000000 | 0.000000 | 0.000000 | 0.000000 |
| height[17] | 0.000000 | 0.000000 | 0.000000 | 0.000000 | 0.000000 |
| height[18] | 0.000000 | 0.000000 | 0.000000 | 0.000000 | 0.000000 |
| height[19] | 0.000000 | 0.000000 | 0.000000 | 0.000000 | 0.000000 |
| height[20] | 0.000000 | 0.000000 | 0.000000 | 0.000000 | 0.000000 |
| height[21] | 0.000000 | 0.000000 | 0.000000 | 0.000000 | 0.000000 |
| height[22] | 0.000000 | 0.000000 | 0.000000 | 0.000000 | 0.000000 |
| height[23] | 0.000000 | 0.000000 | 0.000000 | 0.000000 | 0.000000 |
| height[24] | 0.000000 | 0.000000 | 0.000000 | 0.000000 | 0.000000 |
| height[25] | 0.000000 | 0.000000 | 0.000000 | 0.000000 | 0.000000 |
| height[26] | 0.000000 | 0.000000 | 0.000000 | 0.000000 | 0.000000 |
| height[27] | 0.000000 | 0.000000 | 0.000000 | 0.000000 | 0.000000 |
| height[28] | 0.000000 | 0.000000 | 0.000000 | 0.000000 | 0.000000 |
| height[29] | 0.000000 | 0.000000 | 0.000000 | 0.000000 | 0.000000 |
| height[30] | 0.000000 | 0.000000 | 0.000000 | 0.000000 | 0.000000 |
| height[31] | 0.000000 | 0.000000 | 0.000000 | 0.000000 | 0.000000 |
| height[32] | 0.000000 | 0.000000 | 0.000000 | 0.000000 | 0.000000 |
| height[33] | 0.000000 | 0.000000 | 0.000000 | 0.000000 | 0.000000 |
| height[34] | 0.000000 | 0.000000 | 0.000000 | 0.000000 | 0.000000 |
| height[35] | 0.000000 | 0.000000 | 0.000000 | 0.000000 | 0.000000 |
| height[36] | 0.000000 | 0.000000 | 0.000000 | 0.000000 | 0.000000 |
| height[37] | 0.000000 | 0.000000 | 0.000000 | 0.000000 | 0.000000 |
| height[38] | 0.000000 | 0.000000 | 0.000000 | 0.000000 | 0.000000 |
| height[39] | 0.000000 | 0.000000 | 0.000000 | 0.000000 | 0.000000 |
| height[40] | 0.000000 | 0.000000 | 0.000000 | 0.000000 | 0.000000 |
| height[41] | 0.059751 | 0.000504 | 0.022647 | 0.103790 | 0.057580 |
| height[42] | 0.004291 | 0.000020 | 0.000000 | 0.012862 | 0.002799 |
| height[43] | 0.052506 | 0.000391 | 0.018758 | 0.089932 | 0.050783 |
| height[44] | 0.022168 | 0.000101 | 0.005530 | 0.042340 | 0.020352 |
| height[45] | 0.025920 | 0.000152 | 0.005343 | 0.049727 | 0.023884 |
| height[46] | 0.031511 | 0.000216 | 0.008847 | 0.061441 | 0.028986 |
| height[47] | 0.038541 | 0.000274 | 0.010939 | 0.071239 | 0.036168 |
| height[48] | 0.082706 | 0.000911 | 0.033302 | 0.141484 | 0.079900 |
| height[49] | 0.034740 | 0.000195 | 0.011145 | 0.062004 | 0.032974 |
| height[50] | 0.112457 | 0.001029 | 0.049418 | 0.164957 | 0.115739 |
| height[51] | 0.053876 | 0.000355 | 0.020435 | 0.087831 | 0.052835 |
| height[52] | 0.011611 | 0.000050 | 0.001498 | 0.025551 | 0.010211 |
| height[53] | 0.051447 | 0.000285 | 0.021463 | 0.083135 | 0.051502 |
| height[54] | 0.058069 | 0.000506 | 0.019831 | 0.101331 | 0.055134 |
| height[55] | 0.022734 | 0.000119 | 0.004853 | 0.044907 | 0.021000 |
| height[56] | 0.004520 | 0.000020 | 0.000009 | 0.012884 | 0.003269 |
| height[57] | 0.024809 | 0.000144 | 0.005451 | 0.048723 | 0.022736 |
| height[58] | 0.083106 | 0.001006 | 0.029347 | 0.144767 | 0.080010 |
| height[59] | 0.022765 | 0.000135 | 0.003992 | 0.044651 | 0.020975 |
| height[60] | 0.043937 | 0.000200 | 0.018330 | 0.070262 | 0.043529 |
| height[61] | 0.017417 | 0.000093 | 0.002688 | 0.037108 | 0.015173 |
| height[62] | 0.073170 | 0.000635 | 0.031324 | 0.123658 | 0.071956 |
| height[63] | 0.032437 | 0.000149 | 0.010301 | 0.054070 | 0.031486 |
| height[64] | 0.069388 | 0.000484 | 0.029558 | 0.107289 | 0.070605 |
| height[65] | 0.054199 | 0.000498 | 0.018387 | 0.098328 | 0.050695 |
| height[66] | 0.023530 | 0.000124 | 0.005012 | 0.045384 | 0.021884 |
| height[67] | 0.051551 | 0.000426 | 0.016341 | 0.090321 | 0.048828 |
| height[68] | 0.032339 | 0.000208 | 0.009372 | 0.061799 | 0.029714 |



|             |          |          |          |          |          |
|-------------|----------|----------|----------|----------|----------|
| height[69]  | 0.117329 | 0.001185 | 0.051837 | 0.177879 | 0.119372 |
| height[70]  | 0.059559 | 0.000531 | 0.019933 | 0.103005 | 0.057675 |
| height[71]  | 0.064987 | 0.000409 | 0.028596 | 0.103240 | 0.064787 |
| height[72]  | 0.018344 | 0.000108 | 0.002405 | 0.039250 | 0.015915 |
| height[73]  | 0.031559 | 0.000209 | 0.009568 | 0.062441 | 0.028934 |
| height[74]  | 0.100420 | 0.000788 | 0.049890 | 0.151110 | 0.102589 |
| height[75]  | 0.121329 | 0.001180 | 0.057984 | 0.181059 | 0.122126 |
| height[76]  | 0.093965 | 0.000743 | 0.042176 | 0.141629 | 0.095349 |
| height[77]  | 0.024688 | 0.000126 | 0.006003 | 0.046482 | 0.023070 |
| height[78]  | 0.037039 | 0.000253 | 0.011856 | 0.067020 | 0.034917 |
| height[79]  | 0.065248 | 0.000592 | 0.026523 | 0.113557 | 0.062119 |
| height[80]  | 0.094323 | 0.001050 | 0.035321 | 0.150242 | 0.090415 |
| height[81]  | 0.028674 | 0.000170 | 0.007724 | 0.053799 | 0.027195 |
| height[82]  | 0.137368 | 0.001792 | 0.063428 | 0.209699 | 0.140613 |
| height[83]  | 0.035086 | 0.000162 | 0.012260 | 0.057985 | 0.034426 |
| height[84]  | 0.061716 | 0.000575 | 0.023507 | 0.111166 | 0.058239 |
| height[85]  | 0.050818 | 0.000299 | 0.021331 | 0.084731 | 0.049046 |
| height[86]  | 0.101956 | 0.000898 | 0.048482 | 0.155381 | 0.104448 |
| height[87]  | 0.028802 | 0.000128 | 0.009234 | 0.049750 | 0.027249 |
| height[88]  | 0.041174 | 0.000260 | 0.012655 | 0.071047 | 0.039911 |
| height[89]  | 0.006993 | 0.000023 | 0.000209 | 0.016347 | 0.005874 |
| height[90]  | 0.006664 | 0.000023 | 0.000283 | 0.016094 | 0.005388 |
| height[91]  | 0.038296 | 0.000224 | 0.012667 | 0.066811 | 0.036454 |
| height[92]  | 0.122721 | 0.001408 | 0.058329 | 0.187093 | 0.125378 |
| height[93]  | 0.046347 | 0.000231 | 0.020482 | 0.077273 | 0.045994 |
| height[94]  | 0.077461 | 0.000595 | 0.035394 | 0.121766 | 0.077012 |
| height[95]  | 0.028139 | 0.000126 | 0.007407 | 0.049753 | 0.027115 |
| height[96]  | 0.041049 | 0.000196 | 0.014016 | 0.063807 | 0.040304 |
| height[97]  | 0.068888 | 0.000580 | 0.028223 | 0.115748 | 0.067094 |
| height[98]  | 0.131470 | 0.001418 | 0.061363 | 0.190722 | 0.134013 |
| height[99]  | 0.035417 | 0.000207 | 0.010697 | 0.063466 | 0.033324 |
| height[100] | 0.138863 | 0.001472 | 0.066643 | 0.203026 | 0.141218 |
| height[101] | 0.086977 | 0.000820 | 0.034344 | 0.131870 | 0.089189 |
| height[102] | 0.060361 | 0.000560 | 0.020664 | 0.106271 | 0.058869 |
| height[103] | 0.070221 | 0.000646 | 0.025111 | 0.114759 | 0.066478 |
| height[104] | 0.020445 | 0.000117 | 0.004725 | 0.044006 | 0.018918 |
| height[105] | 0.043866 | 0.000293 | 0.014129 | 0.074901 | 0.041152 |
| height[106] | 0.135788 | 0.001348 | 0.065826 | 0.198742 | 0.138454 |
| height[107] | 0.112265 | 0.001471 | 0.049285 | 0.179215 | 0.112184 |
| height[108] | 0.021432 | 0.000107 | 0.004909 | 0.040280 | 0.019817 |
| height[109] | 0.130216 | 0.001417 | 0.066253 | 0.199277 | 0.135479 |
| height[110] | 0.060485 | 0.000631 | 0.021547 | 0.108690 | 0.054666 |
| height[111] | 0.081271 | 0.000648 | 0.035389 | 0.123360 | 0.082046 |
| height[112] | 0.016476 | 0.000057 | 0.003733 | 0.031068 | 0.015177 |
| height[113] | 0.069656 | 0.000547 | 0.030115 | 0.113276 | 0.068482 |
| height[114] | 0.038404 | 0.000191 | 0.014797 | 0.064711 | 0.037013 |
| height[115] | 0.029836 | 0.000154 | 0.008347 | 0.052876 | 0.027295 |
| height[116] | 0.038711 | 0.000174 | 0.013265 | 0.061813 | 0.037877 |
| height[117] | 0.071439 | 0.000719 | 0.025148 | 0.115518 | 0.069818 |
| height[118] | 0.079636 | 0.000640 | 0.036595 | 0.131423 | 0.076217 |
| height[119] | 0.067803 | 0.000607 | 0.025060 | 0.112853 | 0.067232 |

---

Clade credibility values:

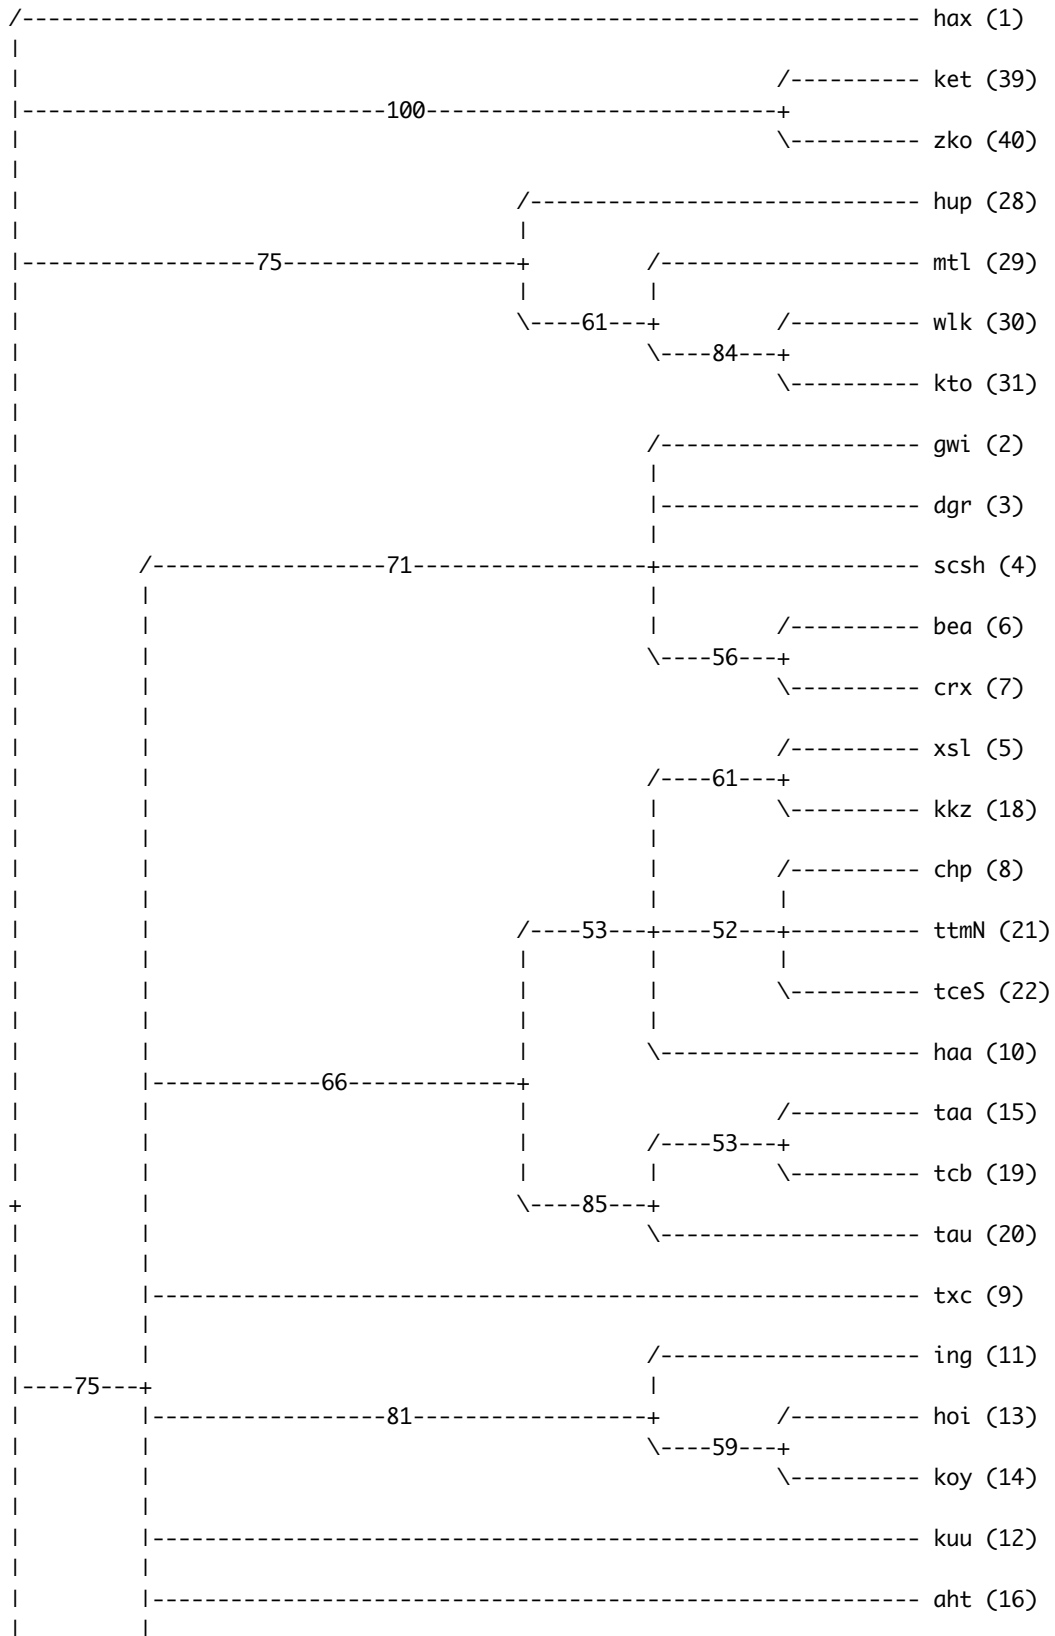

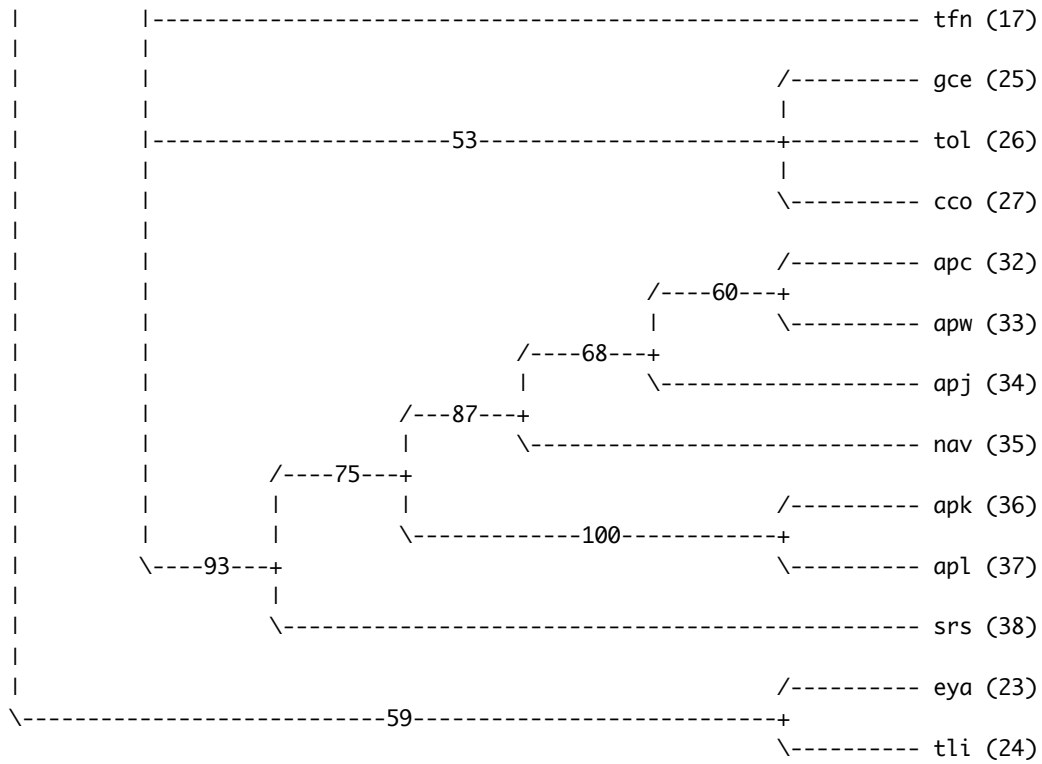

Phylogram (based on median node depths):

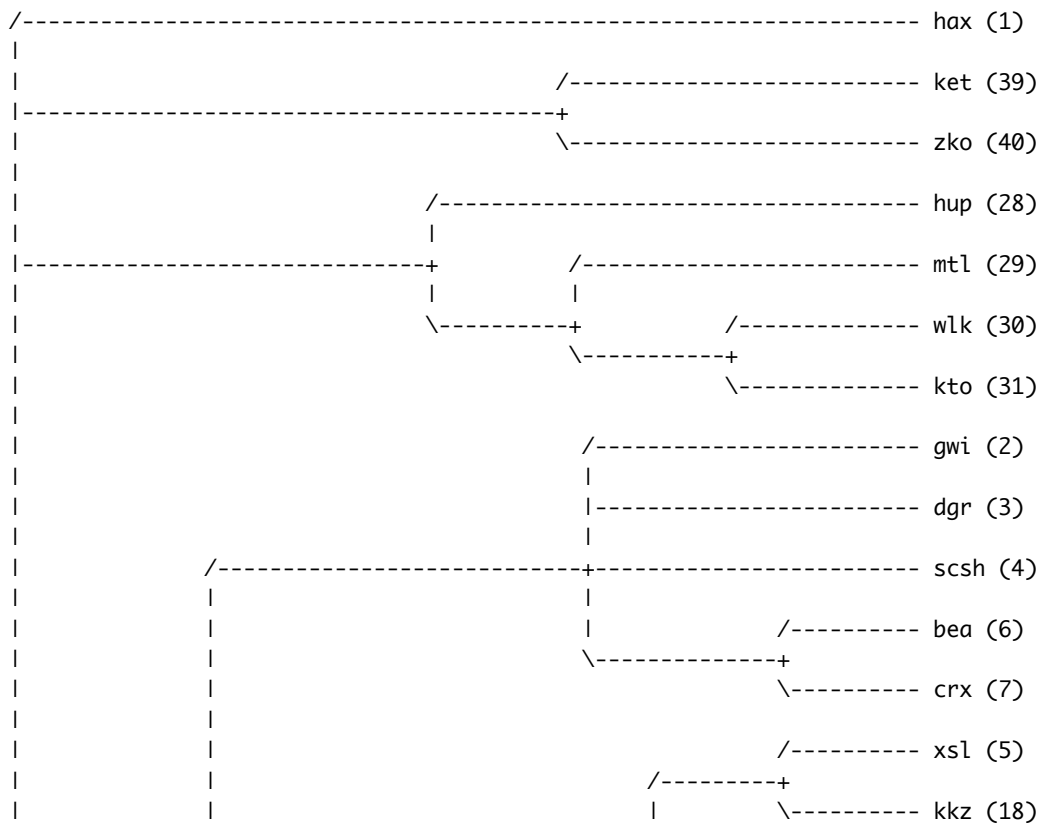

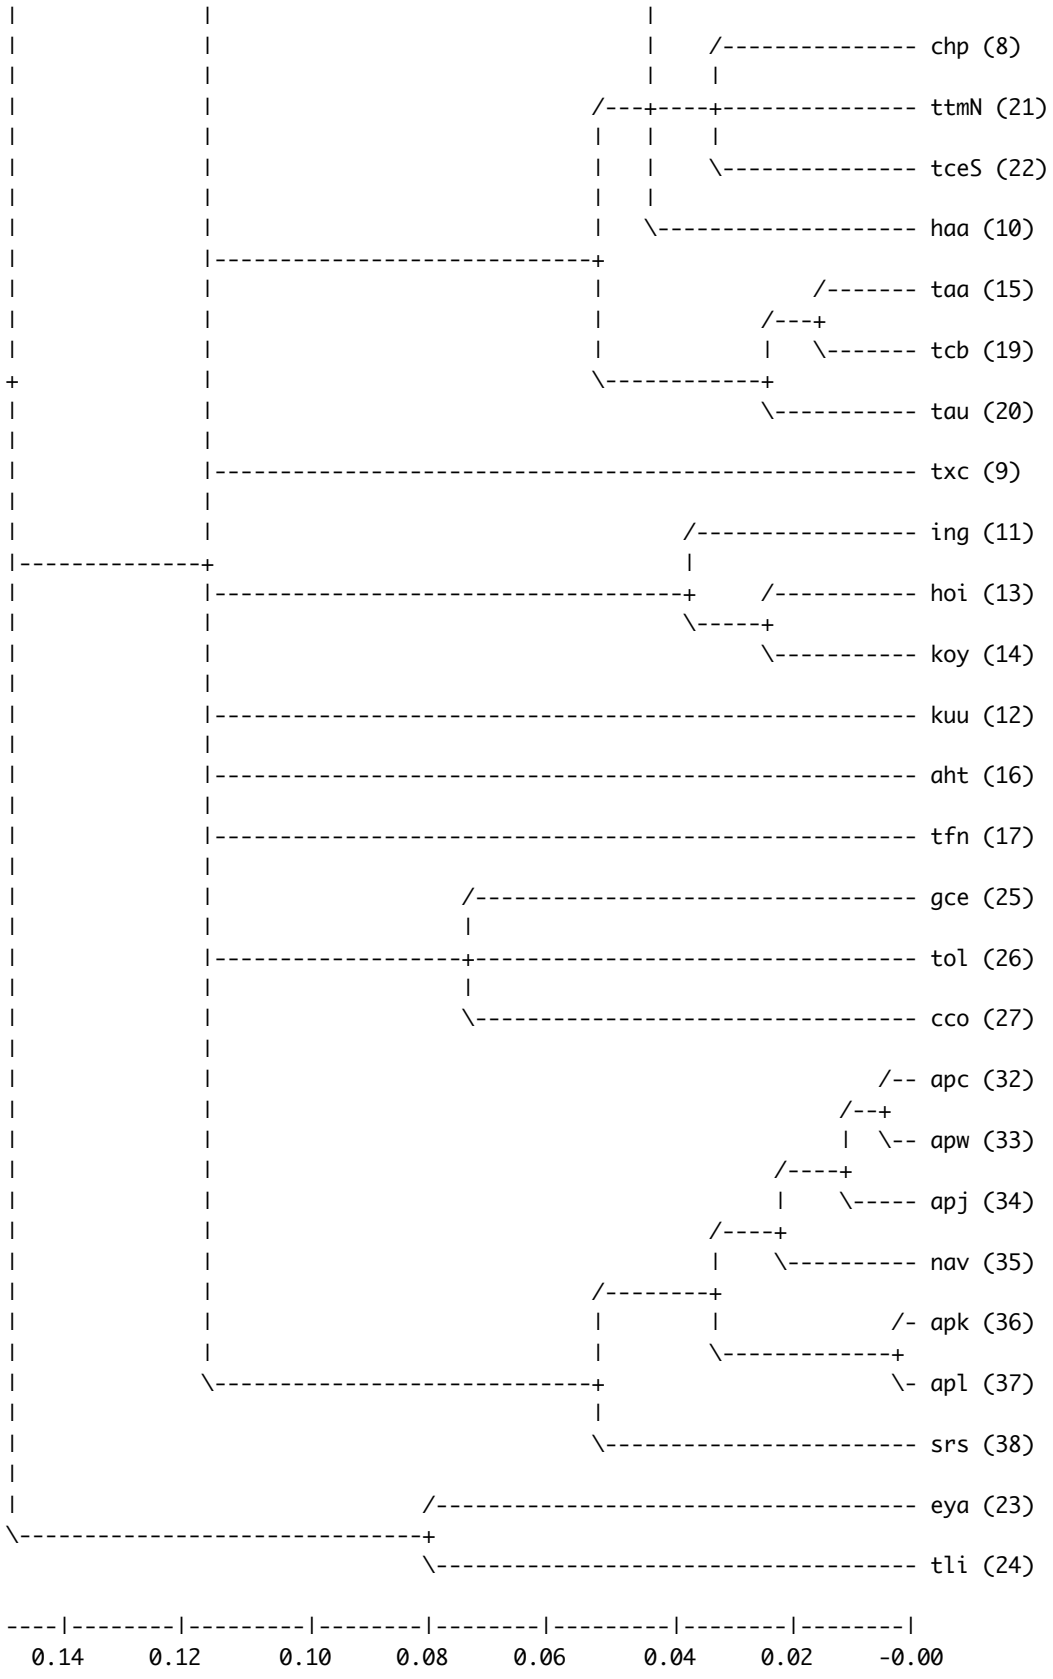

[Expected changes per site]

Calculating tree probabilities...

Credible sets of trees (3001 trees sampled):

- 50 % credible set contains 1501 trees
- 90 % credible set contains 2701 trees
- 95 % credible set contains 2851 trees
- 99 % credible set contains 2971 trees

MrBayes > sump relburnin=yes

Using relative burnin (a fraction of samples discarded).  
Summarizing parameters in file DY-26Dec-strict-Hout2.p  
Writing summary statistics to file DY-26Dec-strict-Hout2.pstat  
Using relative burnin ('relburnin=yes'), discarding the first 25 % of samples

Below is a rough plot of the generation (x-axis) versus the log probability of observing the data (y-axis). You can use this graph to determine what the burn in for your analysis should be. When the log probability starts to plateau you may be at stationarity. Sample trees and parameters after the log probability plateaus. Of course, this is not a guarantee that you are at stationarity. When possible, run multiple analyses starting from different random trees; if the inferences you make for independent analyses are the same, this is reasonable evidence that the chains have converged. You can use MrBayes to run several independent analyses simultaneously. During such a run, MrBayes will monitor the convergence of topologies. After the run has been completed, the 'sumt' and 'sump' functions will provide additional convergence diagnostics for all the parameters in your model. Remember that the burn in is the number of samples to discard. There are a total of ngen / samplefreq samples taken during a MCMC analysis.

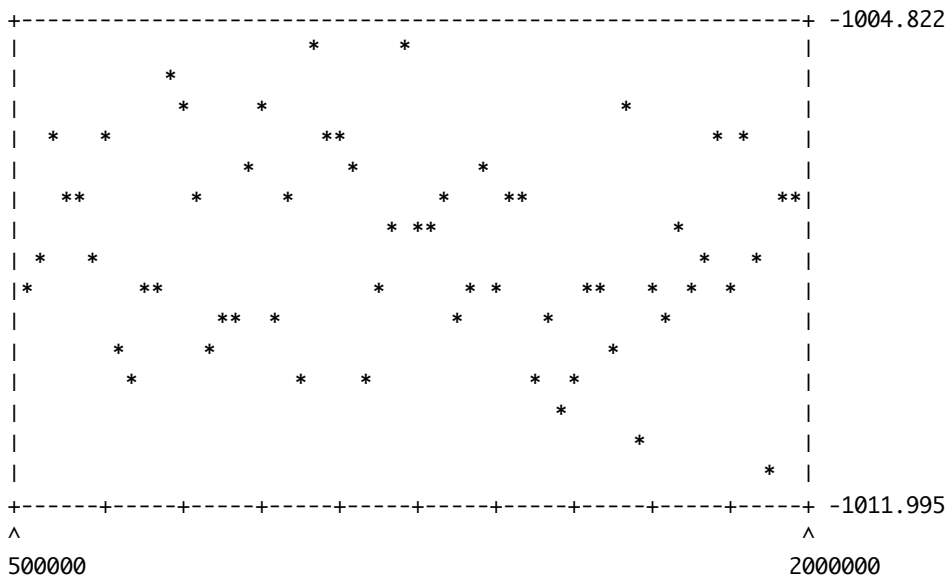

Estimated marginal likelihoods for run sampled in file "DY-26Dec-strict-Hout2.p":  
 (Use the harmonic mean for Bayes factor comparisons of models)  
 (Values are saved to the file /Users/msicoli/DY-Typlogical\_binary\_bayes-2.nex.lstat)

| Arithmetic mean | Harmonic mean |
|-----------------|---------------|
| -996.18         | -1027.76      |

Model parameter summaries for run sampled in file "DY-26Dec-strict-Hout2":  
 Based on a total of 3001 samples out of a total of 4001 samples  
 from this analysis.

Parameter summaries saved to file "/Users/msicoli/DY-Typlogical\_binary\_bayes-2.nex.pstat".

| Parameter | Mean     | Variance | 95% HPD Interval |          | Median   | ESS*   |
|-----------|----------|----------|------------------|----------|----------|--------|
|           |          |          | Lower            | Upper    |          |        |
| TH        | 0.143615 | 0.001725 | 0.068256         | 0.212151 | 0.147314 | 243.95 |
| TL        | 2.439625 | 0.459764 | 1.230095         | 3.583763 | 2.512555 | 223.79 |
| alpha     | 1.086565 | 0.816773 | 0.128740         | 2.635880 | 0.896767 | 413.73 |

\* Convergence diagnostic (ESS = Estimated Sample Size); ESS value below 100 may indicate that the parameter is undersampled.

MrBayes > ssp ngen=100000 diagnfreq=1000 filename=YND-Typ-Hout2-ss

Setting number of generations to 100000  
 Setting diagnosing frequency to 1000

MrBayes > ss

Setting chain output file names to "YND-Typ-Hout2-ss.<p/t>"

Running Markov chain  
 MCMC stamp = 6022182788  
 Seed = 780705211  
 Swapseed = 1290899819

Model settings:

Data not partitioned --  
 Datatype = Standard  
 Coding = Variable  
 # States = Variable, up to 10  
     State frequencies are fixed to be equal  
 Rates = Gamma  
     Gamma shape parameter is uniformly distributed on the interval (0.00,200.00).  
     Gamma distribution is approximated using 4 categories.  
     Likelihood summarized over all rate categories in each generation.

Active parameters:

Parameters

```
-----  
Statefreq      1  
Shape          2  
Ratemultiplier 3  
Topology       4  
Brlens        5  
Clockrate     6  
-----
```

- 1 -- Parameter = Alpha\_symdir  
Type = Symmetric dirichlet/beta distribution alpha\_i parameter  
Prior = Symmetric dirichlet with fixed(-1.00) variance parameter
- 2 -- Parameter = Alpha  
Type = Shape of scaled gamma distribution of site rates  
Prior = Uniform(0.00,200.00)
- 3 -- Parameter = Ratemultiplier  
Type = Partition-specific rate multiplier  
Prior = Fixed(1.0)
- 4 -- Parameter = Tau  
Type = Topology  
Prior = All topologies equally probable a priori  
Subparam. = V
- 5 -- Parameter = V  
Type = Branch lengths  
Prior = Clock:Uniform  
Tree age has an Exponential(1.000) distribution  
Node ages are not constrained
- 6 -- Parameter = Clockrate  
Type = Base rate of clock  
Prior = Fixed(1.000000)  
The clock rate is constant (strict clock)

Number of taxa = 40

Number of characters = 116

The MCMC sampler will use the following moves:

```
With prob. Chain will use move  
2.38 % Multiplier(Alpha)  
11.90 % ExtSprClock(Tau,V)  
23.81 % NNIClock(Tau,V)  
11.90 % ParsSPRClock(Tau,V)  
47.62 % NodesliderClock(V)  
2.38 % TreeStretch(V)
```

Division 1 has 81 unique site patterns

Initializing conditional likelihoods

Using standard non-SSE likelihood calculator for division 1 (single-precision)

Initial log likelihoods and log prior probs:

```
Chain 1 -- -1001.127181 -- -12.625325
Chain 2 -- -1007.355276 -- -30.294350
Chain 3 -- -1009.911630 -- -29.733445
Chain 4 -- -1020.593917 -- -43.326549
```

Starting stepping-stone sampling to estimate marginal likelihood.  
50 steps will be used with 1500 generations (3 samples) within each step.  
Total of 76500 generations (153 samples) will be collected while first  
1500 generations (3 samples) will be discarded as initial burnin.  
Additionally at the beginning of each step 0 generations (0 samples)  
will be discarded as burnin.

Sampling from posterior to prior, i.e. first step samples from close to  
posterior.

NOTE: Number of generation of each step is reduced to the closest multiple  
of sampling frequency. That is why, in total it will be taken 76500 genera-  
tions instead of requested 100000.

Chain results (76500 generations requested):

```
0 -- [-1001.127] (-1007.355) (-1009.912) (-1020.594)
```

Sampling step 1 out of 50 steps...

Sampling step 2 out of 50 steps...

Sampling step 3 out of 50 steps...

Sampling step 4 out of 50 steps...

Sampling step 5 out of 50 steps...

Sampling step 6 out of 50 steps...

```
10000 -- (-1052.155) (-1046.580) [-1031.839] (-1040.015) -- 0:00:39
Sampling step 7 out of 50 steps...
```

Sampling step 8 out of 50 steps...

Sampling step 9 out of 50 steps...

Sampling step 10 out of 50 steps...

Sampling step 11 out of 50 steps...

Sampling step 12 out of 50 steps...

Sampling step 13 out of 50 steps...

```
20000 -- (-1051.856) (-1100.553) [-1047.227] (-1131.271) -- 0:00:33
Sampling step 14 out of 50 steps...
```

Sampling step 15 out of 50 steps...



Sampling step 16 out of 50 steps...

Sampling step 17 out of 50 steps...

Sampling step 18 out of 50 steps...

Sampling step 19 out of 50 steps...

30000 -- (-1296.567) (-1245.607) (-1147.229) [-1142.151] -- 0:00:27  
Sampling step 20 out of 50 steps...

Sampling step 21 out of 50 steps...

Sampling step 22 out of 50 steps...

Sampling step 23 out of 50 steps...

Sampling step 24 out of 50 steps...

Sampling step 25 out of 50 steps...

Sampling step 26 out of 50 steps...

40000 -- (-1462.189) [-1320.794] (-1322.051) (-1349.255) -- 0:00:22  
Sampling step 27 out of 50 steps...

Sampling step 28 out of 50 steps...

Sampling step 29 out of 50 steps...

Sampling step 30 out of 50 steps...

Sampling step 31 out of 50 steps...

Sampling step 32 out of 50 steps...

Sampling step 33 out of 50 steps...

50000 -- (-1444.965) (-1431.647) [-1346.870] (-1403.867) -- 0:00:16  
Sampling step 34 out of 50 steps...

Sampling step 35 out of 50 steps...

Sampling step 36 out of 50 steps...

Sampling step 37 out of 50 steps...

Sampling step 38 out of 50 steps...

Sampling step 39 out of 50 steps...

60000 -- (-1503.649) (-1454.469) [-1457.306] (-1492.975) -- 0:00:10  
Sampling step 40 out of 50 steps...

Sampling step 41 out of 50 steps...

Sampling step 42 out of 50 steps...

Sampling step 43 out of 50 steps...

Sampling step 44 out of 50 steps...

Sampling step 45 out of 50 steps...

Sampling step 46 out of 50 steps...

70000 -- (-2210.742) (-2278.530) [-2175.981] (-2049.667) -- 0:00:04  
Sampling step 47 out of 50 steps...

Sampling step 48 out of 50 steps...

Sampling step 49 out of 50 steps...

Sampling step 50 out of 50 steps...

Analysis completed in 48 seconds  
Analysis used 44.62 seconds of CPU time  
Log likelihood of best state for "cold" chain was -992.96

Marginal likelihood (in natural log units) estimated using stepping-stone sampling based on 50 steps with 1500 generations (3 samples) within each step.

| Run | Marginal likelihood (ln) |
|-----|--------------------------|
| 1   | -1127.56                 |

More statistics on stepping-stone sampling is dumped to YND-Typ-Hout2-ss.ss file.

Plot of average standard deviation of split frequencies across steps.  
Points at -1.0 (y-axis) indicate that there were no splits above minimum frequency for corresponding step.

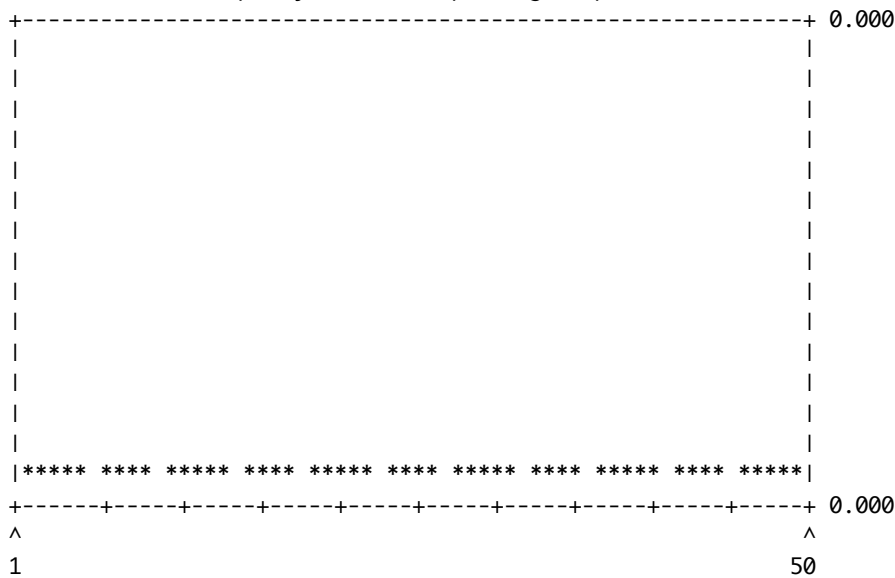

Acceptance rates for the moves in the "cold" chain:

| With prob. | (last 100) | chain accepted proposals by move |
|------------|------------|----------------------------------|
| 49.8 %     | ( 61 %)    | Multiplier(Alpha)                |
| 43.2 %     | ( 59 %)    | ExtSprClock(Tau,V)               |
| 78.4 %     | (100 %)    | NNIClock(Tau,V)                  |
| 33.1 %     | ( 29 %)    | ParsSPRClock(Tau,V)              |
| 86.1 %     | ( 97 %)    | NodesliderClock(V)               |
| 54.7 %     | ( 85 %)    | TreeStretch(V)                   |

Chain swap information:

|   | 1     | 2     | 3     | 4    |
|---|-------|-------|-------|------|
| 1 |       | 0.21  | 0.04  | 0.01 |
| 2 | 12713 |       | 0.31  | 0.08 |
| 3 | 12860 | 12787 |       | 0.36 |
| 4 | 12542 | 12762 | 12836 |      |

Upper diagonal: Proportion of successful state exchanges between chains

Lower diagonal: Number of attempted state exchanges between chains

Chain information:

```
ID -- Heat
-----
1 -- 1.00 (cold chain)
2 -- 0.91
3 -- 0.83
4 -- 0.77
```

Heat =  $1 / (1 + T * (ID - 1))$

(where T = 0.10 is the temperature and ID is the chain number)

MrBayes > ss

```
Running Markov chain
MCMC stamp = 6548936566
Seed = 231125092
Swapseed = 1717525018
Model settings:
```

```
Data not partitioned --
Datatype = Standard
Coding = Variable
# States = Variable, up to 10
State frequencies are fixed to be equal
Rates = Gamma
Gamma shape parameter is uniformly distributed on the interval (0.00,200.00).
Gamma distribution is approximated using 4 categories.
Likelihood summarized over all rate categories in each generation.
```

Active parameters:

Parameters

```
-----  
Statefreq      1  
Shape          2  
Ratemultiplier 3  
Topology       4  
Brlens         5  
Clockrate      6  
-----
```

- 1 -- Parameter = Alpha\_symdir  
Type = Symmetric dirichlet/beta distribution alpha\_i parameter  
Prior = Symmetric dirichlet with fixed(-1.00) variance parameter
- 2 -- Parameter = Alpha  
Type = Shape of scaled gamma distribution of site rates  
Prior = Uniform(0.00,200.00)
- 3 -- Parameter = Ratemultiplier  
Type = Partition-specific rate multiplier  
Prior = Fixed(1.0)
- 4 -- Parameter = Tau  
Type = Topology  
Prior = All topologies equally probable a priori  
Subparam. = V
- 5 -- Parameter = V  
Type = Branch lengths  
Prior = Clock:Uniform  
Tree age has an Exponential(1.000) distribution  
Node ages are not constrained
- 6 -- Parameter = Clockrate  
Type = Base rate of clock  
Prior = Fixed(1.000000)  
The clock rate is constant (strict clock)

Number of taxa = 40

Number of characters = 116

The MCMC sampler will use the following moves:

```
With prob. Chain will use move  
2.38 % Multiplier(Alpha)  
11.90 % ExtSprClock(Tau,V)  
23.81 % NNIClock(Tau,V)  
11.90 % ParsSPRClock(Tau,V)  
47.62 % NodesliderClock(V)  
2.38 % TreeStretch(V)
```

Division 1 has 81 unique site patterns

Initializing conditional likelihoods

Using standard non-SSE likelihood calculator for division 1 (single-precision)

Initial log likelihoods and log prior probs:

```
Chain 1 -- -1700.896933 -- -70.642544
Chain 2 -- -2266.130972 -- -171.769429
Chain 3 -- -2280.289285 -- -222.262241
Chain 4 -- -2308.118309 -- -203.827352
```

Starting stepping-stone sampling to estimate marginal likelihood.  
50 steps will be used with 1500 generations (3 samples) within each step.  
Total of 76500 generations (153 samples) will be collected while first  
1500 generations (3 samples) will be discarded as initial burnin.  
Additionally at the beginning of each step 0 generations (0 samples)  
will be discarded as burnin.  
Sampling from posterior to prior, i.e. first step samples from close to  
posterior.

Chain results (76500 generations requested):

```
0 -- [-1700.897] (-2266.131) (-2280.289) (-2308.118)
Sampling step 1 out of 50 steps...
Sampling step 2 out of 50 steps...
Sampling step 3 out of 50 steps...
Sampling step 4 out of 50 steps...
Sampling step 5 out of 50 steps...
Sampling step 6 out of 50 steps...
10000 -- (-1035.938) (-1029.248) [-1010.146] (-1029.447) -- 0:00:39
Sampling step 7 out of 50 steps...
Sampling step 8 out of 50 steps...
Sampling step 9 out of 50 steps...
Sampling step 10 out of 50 steps...
Sampling step 11 out of 50 steps...
Sampling step 12 out of 50 steps...
Sampling step 13 out of 50 steps...
20000 -- (-1128.993) (-1088.452) (-1098.992) [-1056.226] -- 0:00:33
Sampling step 14 out of 50 steps...
Sampling step 15 out of 50 steps...
Sampling step 16 out of 50 steps...
Sampling step 17 out of 50 steps...
```

Sampling step 18 out of 50 steps...

Sampling step 19 out of 50 steps...

30000 -- (-1180.920) (-1293.324) [-1152.954] (-1182.539) -- 0:00:26

Sampling step 20 out of 50 steps...

Sampling step 21 out of 50 steps...

Sampling step 22 out of 50 steps...

Sampling step 23 out of 50 steps...

Sampling step 24 out of 50 steps...

Sampling step 25 out of 50 steps...

Sampling step 26 out of 50 steps...

40000 -- [-1228.154] (-1381.908) (-1361.579) (-1382.597) -- 0:00:21

Sampling step 27 out of 50 steps...

Sampling step 28 out of 50 steps...

Sampling step 29 out of 50 steps...

Sampling step 30 out of 50 steps...

Sampling step 31 out of 50 steps...

Sampling step 32 out of 50 steps...

Sampling step 33 out of 50 steps...

50000 -- (-1399.794) (-1424.915) [-1466.781] (-1453.575) -- 0:00:15

Sampling step 34 out of 50 steps...

Sampling step 35 out of 50 steps...

Sampling step 36 out of 50 steps...

Sampling step 37 out of 50 steps...

Sampling step 38 out of 50 steps...

Sampling step 39 out of 50 steps...

60000 -- (-1627.987) (-1471.007) [-1466.831] (-1546.448) -- 0:00:09

Sampling step 40 out of 50 steps...

Sampling step 41 out of 50 steps...

Sampling step 42 out of 50 steps...

Sampling step 43 out of 50 steps...

Sampling step 44 out of 50 steps...

Sampling step 45 out of 50 steps...

Sampling step 46 out of 50 steps...

70000 -- (-2307.970) [-1665.981] (-2265.110) (-1983.707) -- 0:00:03

Sampling step 47 out of 50 steps...

Sampling step 48 out of 50 steps...

Sampling step 49 out of 50 steps...

Sampling step 50 out of 50 steps...

Analysis completed in 45 seconds

Analysis used 44.36 seconds of CPU time

Log likelihood of best state for "cold" chain was -1003.68

Marginal likelihood (in natural log units) estimated using stepping-stone sampling based on 50 steps with 1500 generations (3 samples) within each step.

| Run | Marginal likelihood (ln) |
|-----|--------------------------|
| 1   | -1127.07                 |

More statistics on stepping-stone sampling is dumped to YND-Typ-Hout2-ss.ss file.

Plot of average standard deviation of split frequencies across steps. Points at -1.0 (y-axis) indicate that there were no splits above minimum frequency for corresponding step.

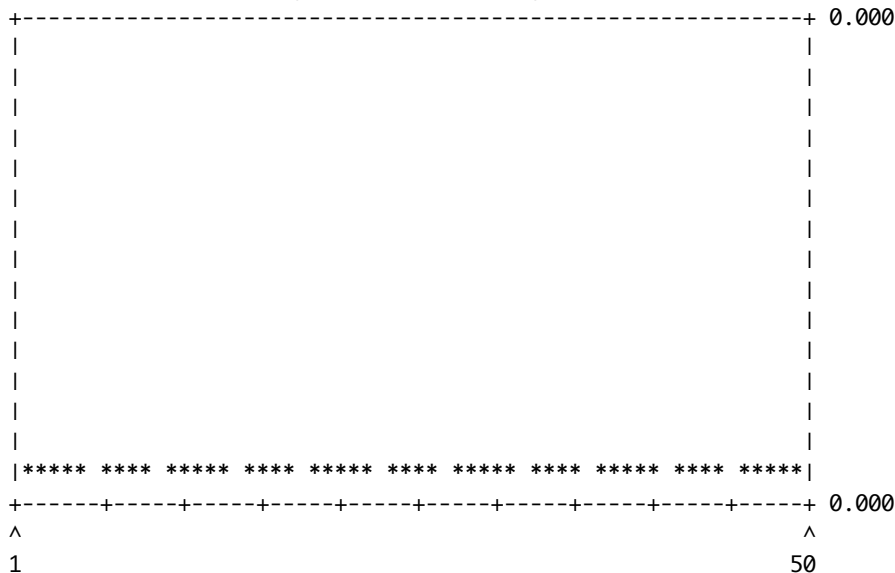

Acceptance rates for the moves in the "cold" chain:

|            |            |                                  |
|------------|------------|----------------------------------|
| With prob. | (last 100) | chain accepted proposals by move |
| 43.8 %     | ( 54 %)    | Multiplier(Alpha)                |

```

43.4 %    ( 64 %)    ExtSprClock(Tau,V)
78.8 %    (100 %)   NNIClock(Tau,V)
32.9 %    ( 25 %)   ParsSPRClock(Tau,V)
86.0 %    ( 98 %)   NodesliderClock(V)
53.6 %    ( 81 %)   TreeStretch(V)

```

Chain swap information:

```

          1      2      3      4
-----
1 |          0.23  0.05  0.01
2 | 12719          0.30  0.07
3 | 12663 12921          0.35
4 | 12905 12609 12683

```

Upper diagonal: Proportion of successful state exchanges between chains

Lower diagonal: Number of attempted state exchanges between chains

Chain information:

```

ID -- Heat
-----
1 -- 1.00 (cold chain)
2 -- 0.91
3 -- 0.83
4 -- 0.77

```

Heat = 1 / (1 + T \* (ID - 1))

(where T = 0.10 is the temperature and ID is the chain number)

MrBayes > ss

```

Running Markov chain
MCMC stamp = 6390972662
Seed = 1735696387
Swapseed = 147486170
Model settings:

```

```

Data not partitioned --
Datatype = Standard
Coding = Variable
# States = Variable, up to 10
          State frequencies are fixed to be equal
Rates = Gamma
          Gamma shape parameter is uniformly distributed on the interval (0.00,200.00).
          Gamma distribution is approximated using 4 categories.
          Likelihood summarized over all rate categories in each generation.

```

Active parameters:

```

Parameters
-----
Statefreq      1
Shape          2

```



Ratemultiplier 3  
Topology 4  
Brlens 5  
Clockrate 6  
-----

- 1 -- Parameter = Alpha\_symdir  
Type = Symmetric dirichlet/beta distribution alpha\_i parameter  
Prior = Symmetric dirichlet with fixed(-1.00) variance parameter
- 2 -- Parameter = Alpha  
Type = Shape of scaled gamma distribution of site rates  
Prior = Uniform(0.00,200.00)
- 3 -- Parameter = Ratemultiplier  
Type = Partition-specific rate multiplier  
Prior = Fixed(1.0)
- 4 -- Parameter = Tau  
Type = Topology  
Prior = All topologies equally probable a priori  
Subparam. = V
- 5 -- Parameter = V  
Type = Branch lengths  
Prior = Clock:Uniform  
Tree age has an Exponential(1.000) distribution  
Node ages are not constrained
- 6 -- Parameter = Clockrate  
Type = Base rate of clock  
Prior = Fixed(1.000000)  
The clock rate is constant (strict clock)

Number of taxa = 40  
Number of characters = 116

The MCMC sampler will use the following moves:

| With prob. | Chain will use move |
|------------|---------------------|
| 2.38 %     | Multiplier(Alpha)   |
| 11.90 %    | ExtSprClock(Tau,V)  |
| 23.81 %    | NNIClock(Tau,V)     |
| 11.90 %    | ParsSPRClock(Tau,V) |
| 47.62 %    | NodesliderClock(V)  |
| 2.38 %     | TreeStretch(V)      |

Division 1 has 81 unique site patterns  
Initializing conditional likelihoods  
Using standard non-SSE likelihood calculator for division 1 (single-precision)

Initial log likelihoods and log prior probs:

|         |    |              |    |             |
|---------|----|--------------|----|-------------|
| Chain 1 | -- | -1750.544444 | -- | -81.031598  |
| Chain 2 | -- | -2269.986807 | -- | -189.910093 |
| Chain 3 | -- | -2295.411042 | -- | -191.476033 |
| Chain 4 | -- | -2277.901644 | -- | -199.106113 |

Starting stepping-stone sampling to estimate marginal likelihood.  
50 steps will be used with 1500 generations (3 samples) within each step.  
Total of 76500 generations (153 samples) will be collected while first  
1500 generations (3 samples) will be discarded as initial burnin.  
Additionally at the beginning of each step 0 generations (0 samples)  
will be discarded as burnin.  
Sampling from posterior to prior, i.e. first step samples from close to  
posterior.

Chain results (76500 generations requested):

0 -- [-1750.544] (-2269.987) (-2295.411) (-2277.902)

Sampling step 1 out of 50 steps...

Sampling step 2 out of 50 steps...

Sampling step 3 out of 50 steps...

Sampling step 4 out of 50 steps...

Sampling step 5 out of 50 steps...

Sampling step 6 out of 50 steps...

10000 -- (-1031.442) [-1016.888] (-1049.916) (-1047.454) -- 0:00:39

Sampling step 7 out of 50 steps...

Sampling step 8 out of 50 steps...

Sampling step 9 out of 50 steps...

Sampling step 10 out of 50 steps...

Sampling step 11 out of 50 steps...

Sampling step 12 out of 50 steps...

Sampling step 13 out of 50 steps...

20000 -- [-1078.900] (-1159.212) (-1080.756) (-1083.329) -- 0:00:36

Sampling step 14 out of 50 steps...

Sampling step 15 out of 50 steps...

Sampling step 16 out of 50 steps...

Sampling step 17 out of 50 steps...

Sampling step 18 out of 50 steps...

Sampling step 19 out of 50 steps...

30000 -- (-1267.103) [-1118.587] (-1225.274) (-1241.654) -- 0:00:27  
Sampling step 20 out of 50 steps...

Sampling step 21 out of 50 steps...

Sampling step 22 out of 50 steps...

Sampling step 23 out of 50 steps...

Sampling step 24 out of 50 steps...

Sampling step 25 out of 50 steps...

Sampling step 26 out of 50 steps...

40000 -- (-1356.317) [-1207.039] (-1354.253) (-1404.918) -- 0:00:21  
Sampling step 27 out of 50 steps...

Sampling step 28 out of 50 steps...

Sampling step 29 out of 50 steps...

Sampling step 30 out of 50 steps...

Sampling step 31 out of 50 steps...

Sampling step 32 out of 50 steps...

Sampling step 33 out of 50 steps...

50000 -- (-1444.109) (-1362.327) (-1467.370) [-1339.991] -- 0:00:15  
Sampling step 34 out of 50 steps...

Sampling step 35 out of 50 steps...

Sampling step 36 out of 50 steps...

Sampling step 37 out of 50 steps...

Sampling step 38 out of 50 steps...

Sampling step 39 out of 50 steps...

60000 -- (-1506.013) (-1465.573) (-1484.749) [-1449.323] -- 0:00:09  
Sampling step 40 out of 50 steps...

Sampling step 41 out of 50 steps...

Sampling step 42 out of 50 steps...

Sampling step 43 out of 50 steps...

Sampling step 44 out of 50 steps...

Sampling step 45 out of 50 steps...

Sampling step 46 out of 50 steps...

70000 -- (-2300.140) [-1590.175] (-2286.516) (-2258.392) -- 0:00:03

Sampling step 47 out of 50 steps...

Sampling step 48 out of 50 steps...

Sampling step 49 out of 50 steps...

Sampling step 50 out of 50 steps...

Analysis completed in 45 seconds

Analysis used 44.39 seconds of CPU time

Log likelihood of best state for "cold" chain was -1002.80

Marginal likelihood (in natural log units) estimated using stepping-stone sampling based on 50 steps with 1500 generations (3 samples) within each step.

| Run | Marginal likelihood (ln) |
|-----|--------------------------|
| 1   | -1125.48                 |

More statistics on stepping-stone sampling is dumped to YND-Typ-Hout2-ss.ss file.

Plot of average standard deviation of split frequencies across steps. Points at -1.0 (y-axis) indicate that there were no splits above minimum frequency for corresponding step.

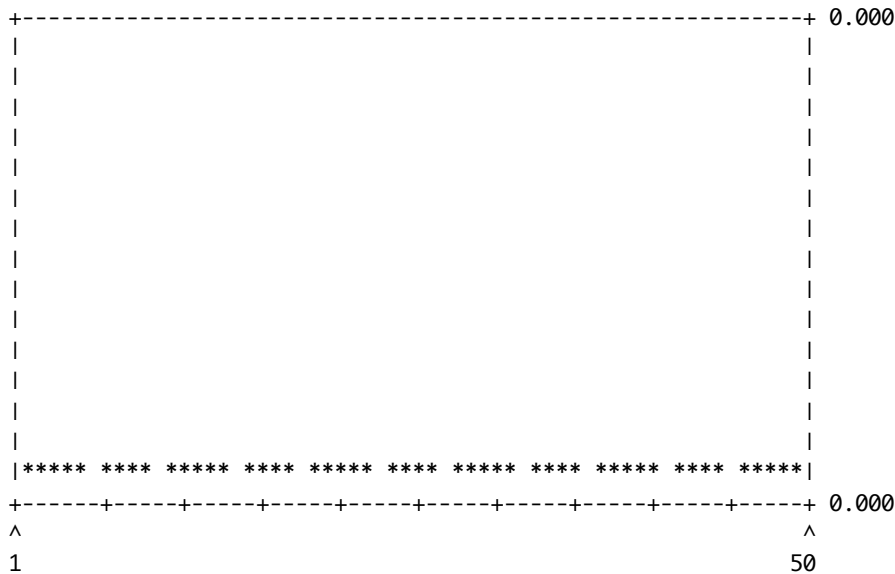

Acceptance rates for the moves in the "cold" chain:

| With prob. | (last 100) | chain accepted proposals by move |
|------------|------------|----------------------------------|
| 43.3 %     | ( 51 %)    | Multiplier(Alpha)                |
| 43.2 %     | ( 53 %)    | ExtSprClock(Tau,V)               |
| 78.8 %     | (100 %)    | NNIClock(Tau,V)                  |
| 33.0 %     | ( 27 %)    | ParsSPRClock(Tau,V)              |
| 86.0 %     | (100 %)    | NodesliderClock(V)               |

52.3 % ( 91 %) TreeStretch(V)

Chain swap information:

|   | 1     | 2     | 3     | 4    |
|---|-------|-------|-------|------|
| 1 |       | 0.18  | 0.05  | 0.01 |
| 2 | 12763 |       | 0.31  | 0.08 |
| 3 | 12778 | 12783 |       | 0.37 |
| 4 | 12663 | 12704 | 12809 |      |

Upper diagonal: Proportion of successful state exchanges between chains

Lower diagonal: Number of attempted state exchanges between chains

Chain information:

```
ID -- Heat
-----
1 -- 1.00 (cold chain)
2 -- 0.91
3 -- 0.83
4 -- 0.77
```

Heat =  $1 / (1 + T * (ID - 1))$

(where T = 0.10 is the temperature and ID is the chain number)

MrBayes >
