# Supplementary material for: Linguistic Phylogenies Support Back-Migration from Beringia to Asia
Source: PubMed Central journal article supplement (PMC3951421; doi:10.1371/journal.pone.0091722), 2014-03-12
Supplement: pone.0091722.s004.pdf [file pone.0091722.s004.pdf]

Sicoli-Holton: Linguistic phylogenies support back-migration from Beringia to Asia

MCMC Runs without Haida Outgroup in matrix

|                                                  |    |
|--------------------------------------------------|----|
| With Na-Dene Ingroup Constraint                  | 2  |
| Without Na-Dene Ingroup Constraint               | 27 |
| Alternate Yeniseian without Kott and without Ket | 53 |
| Alternate Na-Dene without Eyak                   | 84 |

MrBayes v3.2.1 x64

(Bayesian Analysis of Phylogeny)

Distributed under the GNU General Public License

Type "help" or "help <command>" for information  
on the commands that are available.

Type "about" for authorship and general  
information about the program.

MrBayes > exe /Users/msicoli/Yeniseian-NaDene-Typological\_noHAX.nex

Executing file "/Users/msicoli/Yeniseian-NaDene-Typological\_noHAX.nex"

UNIX line termination

Longest line length = 123

Parsing file

Expecting NEXUS formatted file

Reading data block

Allocated taxon set

Allocated matrix

Defining new matrix with 39 taxa and 116 characters

Data is Standard

Missing data coded as ?

Gaps coded as -

Data matrix is not interleaved

Taxon 1 -> gwi

Taxon 2 -> dgr

Taxon 3 -> scsh

Taxon 4 -> xsl

Taxon 5 -> bea

Taxon 6 -> crx

Taxon 7 -> chp

Taxon 8 -> txc

Taxon 9 -> haa

Taxon 10 -> ing

Taxon 11 -> kuu

Taxon 12 -> hoi

Taxon 13 -> koy

Taxon 14 -> taa

Taxon 15 -> aht

Taxon 16 -> tfn

Taxon 17 -> kkz

Taxon 18 -> tcb

Taxon 19 -> tau

Taxon 20 -> ttmN

Taxon 21 -> tceS

Taxon 22 -> eya

Taxon 23 -> tli

Taxon 24 -> gce

Taxon 25 -> tol

Taxon 26 -> cco

Taxon 27 -> hup

Taxon 28 -> mtl

```

Taxon 29 -> wlk
Taxon 30 -> kto
Taxon 31 -> apc
Taxon 32 -> apw
Taxon 33 -> apj
Taxon 34 -> nav
Taxon 35 -> apk
Taxon 36 -> apl
Taxon 37 -> srs
Taxon 38 -> ket
Taxon 39 -> zko
Successfully read matrix
Setting default partition (does not divide up characters)
Setting model defaults
Seed (for generating default start values) = 1388062882
Adding dummy characters (unobserved site patterns) for division 1
WARNING: There are 32 characters incompatible with the specified
        coding bias. These characters will be excluded.
Setting output file names to "/Users/msicoli/Yeniseian-NaDene-Typological_noHAX.nex.run<i>.<p/
t>"
Exiting data block
Reached end of file

MrBayes > lset nst=6 rates=gamma

Setting Rates to Gamma
Successfully set likelihood model parameters
Adding dummy characters (unobserved site patterns) for division 1
WARNING: There are 32 characters incompatible with the specified
        coding bias. These characters will be excluded.

MrBayes > prset brlenspr=clock:uniform

Setting Brlenspr to Clock:Uniform
Successfully set prior model parameters
Adding dummy characters (unobserved site patterns) for division 1
WARNING: There are 32 characters incompatible with the specified
        coding bias. These characters will be excluded.

MrBayes > constraint ingroup = 1-37

Defining constraint called 'ingroup'

MrBayes > prset topologypr = constraints(ingroup)

Setting Topologypr to Constraints
Successfully set prior model parameters
Adding dummy characters (unobserved site patterns) for division 1
WARNING: There are 32 characters incompatible with the specified
        coding bias. These characters will be excluded.

MrBayes > mcmc ngen=2000000 printfreq=10000 samplefreq=500 nruns=1 nchains=4 savebrlens=yes
filename=DY-26Dec-strict-Yout

Setting number of generations to 2000000
Setting print frequency to 10000
Setting sample frequency to 500
Setting number of runs to 1
Setting number of chains to 4
Setting chain output file names to "DY-26Dec-strict-Yout.<p/t>"
Successfully set chain parameters

```

MrBayes > mcmc

Running Markov chain  
MCMC stamp = 4319925389  
Seed = 810769782  
Swapseed = 1388062882  
Model settings:

Data not partitioned --  
Datatype = Standard  
Coding = Variable  
# States = Variable, up to 10  
State frequencies are fixed to be equal  
Rates = Gamma  
Gamma shape parameter is uniformly distributed on the interval (0.00,200.00).  
Gamma distribution is approximated using 4 categories.  
Likelihood summarized over all rate categories in each generation.

Active parameters:

Parameters  
-----  
Statefreq 1  
Shape 2  
Ratemultiplier 3  
Topology 4  
Brlens 5  
Clockrate 6  
-----

1 -- Parameter = Alpha\_symdir  
Type = Symmetric dirichlet/beta distribution alpha\_i parameter  
Prior = Symmetric dirichlet with fixed(-1.00) variance parameter

2 -- Parameter = Alpha  
Type = Shape of scaled gamma distribution of site rates  
Prior = Uniform(0.00,200.00)

3 -- Parameter = Ratemultiplier  
Type = Partition-specific rate multiplier  
Prior = Fixed(1.0)

4 -- Parameter = Tau  
Type = Topology  
Prior = Prior on topologies obeys constraints  
Subparam. = V

5 -- Parameter = V  
Type = Branch lengths  
Prior = Clock:Uniform  
Tree age has an Exponential(1.000) distribution  
Node ages are not constrained

6 -- Parameter = Clockrate  
Type = Base rate of clock  
Prior = Fixed(1.000000)  
The clock rate is constant (strict clock)

Number of taxa = 39  
Number of characters = 116

The MCMC sampler will use the following moves:

With prob. Chain will use move  
2.38 % Multiplier(Alpha)  
11.90 % ExtSprClock(Tau,V)  
23.81 % NNIClock(Tau,V)  
11.90 % ParsSPRClock(Tau,V)  
47.62 % NodesliderClock(V)  
2.38 % TreeStretch(V)

Division 1 has 78 unique site patterns  
Initializing conditional likelihoods  
Using standard non-SSE likelihood calculator for division 1 (single-precision)

Initial log likelihoods and log prior probs:

Chain 1 -- -1428.020263 -- -90.228070  
Chain 2 -- -1465.865890 -- -90.228070  
Chain 3 -- -1507.829723 -- -90.228070  
Chain 4 -- -1413.110454 -- -90.228070

Chain results (2000000 generations requested):

0 -- [-1428.020] (-1465.866) (-1507.830) (-1413.110)  
10000 -- (-956.661) [-939.240] (-961.285) (-990.588) -- 0:16:35  
20000 -- (-953.753) [-946.552] (-936.552) (-961.812) -- 0:18:09  
30000 -- (-939.339) [-947.392] (-949.050) (-951.806) -- 0:19:42  
40000 -- [-936.517] (-945.195) (-948.670) (-950.461) -- 0:18:47  
50000 -- (-943.559) (-964.183) [-941.975] (-939.836) -- 0:18:51  
60000 -- (-939.353) (-953.256) [-942.406] (-945.524) -- 0:18:51  
70000 -- (-941.974) (-938.978) [-941.328] (-936.462) -- 0:19:18  
80000 -- (-942.158) (-946.194) (-945.313) [-931.431] -- 0:19:12  
90000 -- (-955.578) (-948.217) (-939.845) [-937.468] -- 0:18:44  
100000 -- (-941.252) (-958.785) (-947.829) [-942.538] -- 0:18:41  
110000 -- (-931.237) (-954.540) (-948.089) [-957.763] -- 0:18:36  
120000 -- (-935.957) (-960.215) (-966.662) [-942.530] -- 0:18:32  
130000 -- (-945.721) (-948.508) [-938.421] (-932.228) -- 0:18:27  
140000 -- (-949.544) (-937.795) (-947.729) [-925.346] -- 0:18:22  
150000 -- (-951.360) (-942.294) [-943.788] (-939.384) -- 0:18:17  
160000 -- (-958.394) (-943.516) [-933.970] (-948.273) -- 0:18:01  
170000 -- (-945.436) [-944.757] (-944.179) (-947.381) -- 0:17:56  
180000 -- (-946.648) [-937.378] (-942.479) (-952.588) -- 0:17:51  
190000 -- (-951.638) (-930.265) [-940.257] (-927.867) -- 0:17:46  
200000 -- (-956.614) (-955.130) (-954.071) [-937.399] -- 0:17:42  
210000 -- (-952.975) (-957.294) [-935.846] (-952.279) -- 0:17:36  
220000 -- (-958.620) (-949.538) (-946.000) [-926.777] -- 0:17:31  
230000 -- [-947.648] (-943.248) (-949.371) (-940.165) -- 0:17:34  
240000 -- (-956.921) (-961.981) [-932.126] (-947.126) -- 0:17:28  
250000 -- (-958.487) (-953.354) (-957.314) [-947.301] -- 0:17:23  
260000 -- (-948.357) (-938.603) [-935.215] (-936.103) -- 0:17:24  
270000 -- (-941.035) (-944.919) [-941.173] (-952.686) -- 0:17:11  
280000 -- (-955.508) (-941.948) [-937.136] (-961.092) -- 0:17:05  
290000 -- (-931.322) (-941.578) [-941.169] (-955.148) -- 0:17:00  
300000 -- [-936.619] (-944.377) (-943.901) (-958.164) -- 0:16:54  
310000 -- (-947.575) [-939.666] (-943.495) (-929.893) -- 0:16:48  
320000 -- [-946.062] (-956.364) (-938.728) (-956.746) -- 0:16:42  
330000 -- (-962.891) (-939.246) [-936.199] (-947.624) -- 0:16:36  
340000 -- (-964.655) (-964.656) (-957.760) [-940.143] -- 0:16:31  
350000 -- (-950.653) [-940.270] (-945.548) (-945.307) -- 0:16:29

360000 -- (-967.134) (-952.410) [-924.421] (-949.378) -- 0:16:23  
370000 -- (-946.769) [-948.157] (-953.179) (-934.029) -- 0:16:13  
380000 -- (-945.542) (-946.100) [-930.504] (-965.427) -- 0:16:07  
390000 -- [-943.409] (-959.099) (-943.216) (-957.242) -- 0:16:05  
400000 -- (-951.635) (-942.127) [-938.168] (-957.550) -- 0:15:59  
410000 -- (-942.316) (-931.299) (-932.134) [-924.663] -- 0:15:53  
420000 -- (-945.186) [-953.568] (-948.481) (-960.233) -- 0:15:44  
430000 -- [-947.354] (-926.698) (-950.433) (-945.152) -- 0:15:38  
440000 -- (-947.651) (-948.526) [-943.261] (-962.302) -- 0:15:35  
450000 -- (-961.279) (-943.161) (-954.033) [-942.448] -- 0:15:29  
460000 -- (-965.775) (-954.757) (-964.364) [-946.222] -- 0:15:27  
470000 -- (-957.604) [-943.749] (-939.783) (-948.781) -- 0:15:21  
480000 -- (-938.665) (-939.128) [-933.938] (-950.623) -- 0:15:15  
490000 -- (-941.166) (-940.595) (-949.494) [-943.891] -- 0:15:09  
500000 -- (-955.149) (-938.509) [-935.292] (-938.046) -- 0:14:59  
510000 -- (-938.704) (-973.313) (-937.718) [-950.574] -- 0:14:53  
520000 -- (-952.978) [-934.681] (-945.533) (-956.133) -- 0:14:47  
530000 -- (-944.239) (-962.122) (-942.791) [-941.981] -- 0:14:39  
540000 -- (-955.511) [-939.510] (-954.834) (-947.752) -- 0:14:33  
550000 -- [-930.472] (-936.596) (-949.263) (-947.559) -- 0:14:27  
560000 -- (-946.997) (-945.138) (-949.391) [-950.474] -- 0:14:23  
570000 -- [-941.057] (-948.909) (-948.288) (-935.630) -- 0:14:17  
580000 -- (-956.686) (-958.445) (-965.463) [-941.371] -- 0:14:16  
590000 -- (-956.403) (-935.579) (-941.279) [-955.455] -- 0:14:13  
600000 -- (-965.409) (-949.490) (-940.922) [-932.924] -- 0:14:07  
610000 -- (-948.417) (-945.902) (-947.985) [-925.888] -- 0:14:03  
620000 -- (-936.017) [-943.401] (-950.686) (-947.564) -- 0:13:56  
630000 -- (-954.573) (-951.758) [-938.822] (-955.029) -- 0:13:50  
640000 -- [-936.942] (-967.257) (-934.698) (-948.270) -- 0:13:44  
650000 -- (-946.879) (-937.670) [-939.830] (-951.332) -- 0:13:38  
660000 -- (-966.595) (-953.876) (-937.519) [-941.373] -- 0:13:36  
670000 -- (-934.119) [-943.653] (-973.770) (-942.533) -- 0:13:29  
680000 -- (-941.440) (-940.264) (-965.192) [-943.277] -- 0:13:23  
690000 -- (-957.701) (-953.645) [-939.908] (-943.903) -- 0:13:15  
700000 -- (-956.708) [-936.047] (-949.250) (-947.300) -- 0:13:11  
710000 -- (-955.844) (-947.796) [-933.697] (-938.944) -- 0:13:03  
720000 -- (-942.242) (-932.853) [-933.258] (-944.764) -- 0:12:56  
730000 -- [-933.600] (-942.810) (-964.002) (-945.608) -- 0:12:52  
740000 -- [-951.307] (-945.463) (-952.726) (-941.148) -- 0:12:46  
750000 -- [-942.197] (-948.696) (-958.047) (-948.306) -- 0:12:38  
760000 -- (-952.956) [-932.217] (-953.203) (-945.281) -- 0:12:32  
770000 -- (-951.126) [-937.996] (-961.204) (-956.869) -- 0:12:24  
780000 -- [-942.038] (-952.265) (-958.698) (-944.965) -- 0:12:18  
790000 -- (-942.014) (-956.199) [-938.823] (-943.796) -- 0:12:10  
800000 -- (-956.080) [-939.505] (-969.418) (-936.897) -- 0:12:04  
810000 -- (-940.772) [-936.974] (-952.856) (-949.069) -- 0:11:56  
820000 -- (-968.960) [-944.222] (-945.530) (-938.820) -- 0:11:50  
830000 -- (-957.292) (-952.909) (-972.062) [-937.183] -- 0:11:46  
840000 -- (-953.750) (-939.265) [-938.609] (-951.872) -- 0:11:40  
850000 -- (-954.720) (-946.566) (-945.641) [-956.029] -- 0:11:32  
860000 -- [-952.504] (-957.265) (-936.190) (-942.814) -- 0:11:26  
870000 -- (-966.589) (-937.699) [-943.110] (-946.914) -- 0:11:20  
880000 -- (-936.914) (-948.494) [-947.911] (-938.014) -- 0:11:14  
890000 -- (-970.012) (-954.130) (-946.865) [-937.508] -- 0:11:07  
900000 -- (-965.870) (-934.626) (-958.652) [-934.549] -- 0:11:01  
910000 -- (-945.323) (-945.783) [-945.862] (-951.481) -- 0:10:53  
920000 -- [-944.094] (-954.000) (-958.869) (-939.347) -- 0:10:48  
930000 -- (-948.623) (-942.336) [-929.047] (-973.866) -- 0:10:40  
940000 -- (-944.452) [-940.111] (-963.354) (-945.005) -- 0:10:34  
950000 -- (-943.715) [-935.242] (-959.485) (-959.983) -- 0:10:27  
960000 -- (-937.469) (-934.587) [-937.805] (-953.959) -- 0:10:21

970000 -- [-937.250] (-951.277) (-940.329) (-933.825) -- 0:10:14  
980000 -- (-950.020) [-939.588] (-952.639) (-952.575) -- 0:10:08  
990000 -- [-944.306] (-945.235) (-946.712) (-961.864) -- 0:10:02  
1000000 -- (-941.583) (-964.245) (-959.712) [-950.668] -- 0:09:58  
1010000 -- (-946.181) (-938.012) [-943.257] (-933.815) -- 0:09:52  
1020000 -- [-947.756] (-937.361) (-962.722) (-942.845) -- 0:09:46  
1030000 -- (-950.679) (-942.785) [-935.143] (-943.399) -- 0:09:42  
1040000 -- (-948.735) [-945.352] (-947.380) (-947.544) -- 0:09:36  
1050000 -- (-936.558) (-942.708) [-950.389] (-950.988) -- 0:09:30  
1060000 -- (-955.279) [-960.088] (-936.190) (-953.336) -- 0:09:24  
1070000 -- [-936.587] (-951.411) (-957.258) (-957.110) -- 0:09:18  
1080000 -- (-954.794) (-945.837) (-949.618) [-943.366] -- 0:09:12  
1090000 -- [-943.513] (-970.021) (-938.748) (-963.868) -- 0:09:05  
1100000 -- (-949.045) (-949.585) [-935.552] (-965.631) -- 0:08:59  
1110000 -- (-940.104) [-942.832] (-943.005) (-960.150) -- 0:08:53  
1120000 -- [-941.307] (-959.470) (-952.508) (-960.427) -- 0:08:46  
1130000 -- (-944.933) (-956.858) [-934.887] (-930.151) -- 0:08:40  
1140000 -- [-937.874] (-962.268) (-942.574) (-948.658) -- 0:08:33  
1150000 -- (-945.986) [-956.585] (-950.500) (-935.874) -- 0:08:27  
1160000 -- [-930.005] (-945.101) (-947.517) (-937.118) -- 0:08:21  
1170000 -- [-931.648] (-946.005) (-947.993) (-946.162) -- 0:08:14  
1180000 -- (-953.726) (-950.120) (-945.169) [-933.647] -- 0:08:08  
1190000 -- (-945.917) [-936.644] (-941.833) (-956.338) -- 0:08:01  
1200000 -- [-941.785] (-941.825) (-947.350) (-944.472) -- 0:07:56  
1210000 -- [-939.283] (-945.913) (-961.139) (-950.880) -- 0:07:49  
1220000 -- (-940.428) (-942.500) (-957.176) [-956.941] -- 0:07:43  
1230000 -- (-951.847) (-953.003) [-939.577] (-946.709) -- 0:07:36  
1240000 -- (-962.562) [-948.055] (-951.359) (-936.534) -- 0:07:31  
1250000 -- (-950.229) [-945.850] (-937.218) (-955.748) -- 0:07:24  
1260000 -- [-936.353] (-954.916) (-943.966) (-956.985) -- 0:07:18  
1270000 -- (-936.325) [-935.337] (-955.291) (-951.999) -- 0:07:12  
1280000 -- [-959.463] (-941.132) (-949.448) (-946.188) -- 0:07:06  
1290000 -- [-939.965] (-953.091) (-946.539) (-943.268) -- 0:07:00  
1300000 -- [-933.010] (-956.170) (-968.077) (-945.396) -- 0:06:54  
1310000 -- (-950.338) (-933.592) [-938.278] (-941.479) -- 0:06:48  
1320000 -- [-941.130] (-964.054) (-962.124) (-936.620) -- 0:06:42  
1330000 -- [-933.245] (-958.594) (-938.576) (-944.456) -- 0:06:35  
1340000 -- [-936.819] (-935.248) (-947.994) (-947.352) -- 0:06:30  
1350000 -- (-954.746) (-951.183) (-951.192) [-933.690] -- 0:06:23  
1360000 -- (-959.827) (-938.311) (-945.975) [-936.801] -- 0:06:17  
1370000 -- (-946.953) (-936.817) (-938.938) [-935.051] -- 0:06:11  
1380000 -- (-957.702) (-953.344) [-937.245] (-961.633) -- 0:06:05  
1390000 -- [-938.604] (-943.406) (-946.778) (-950.486) -- 0:05:59  
1400000 -- (-964.522) (-952.324) [-938.272] (-942.260) -- 0:05:53  
1410000 -- (-951.496) [-945.116] (-975.790) (-954.268) -- 0:05:47  
1420000 -- (-961.508) (-962.601) [-949.204] (-936.399) -- 0:05:41  
1430000 -- (-939.174) (-947.373) [-938.820] (-956.200) -- 0:05:35  
1440000 -- (-956.209) [-946.606] (-961.229) (-939.893) -- 0:05:29  
1450000 -- (-958.095) (-940.851) (-958.556) [-947.457] -- 0:05:23  
1460000 -- (-962.448) [-933.482] (-948.203) (-946.883) -- 0:05:17  
1470000 -- (-946.528) (-947.070) (-947.565) [-933.865] -- 0:05:11  
1480000 -- (-948.265) [-941.362] (-960.055) (-942.283) -- 0:05:05  
1490000 -- (-940.081) [-938.230] (-956.180) (-960.492) -- 0:04:59  
1500000 -- (-946.649) [-936.376] (-954.326) (-963.756) -- 0:04:53  
1510000 -- (-936.026) [-932.688] (-956.255) (-966.857) -- 0:04:47  
1520000 -- [-937.321] (-943.045) (-950.257) (-960.978) -- 0:04:42  
1530000 -- (-949.562) [-928.693] (-961.269) (-945.591) -- 0:04:36  
1540000 -- (-940.760) [-953.156] (-941.007) (-947.187) -- 0:04:30  
1550000 -- [-941.511] (-949.557) (-947.982) (-931.924) -- 0:04:24  
1560000 -- (-952.284) (-938.661) (-941.518) [-929.941] -- 0:04:18  
1570000 -- (-938.187) (-962.548) (-932.809) [-945.196] -- 0:04:13

```

1580000 -- (-959.472) (-955.734) (-938.409) [-929.875] -- 0:04:06
1590000 -- [-938.736] (-946.975) (-938.167) (-952.272) -- 0:04:01
1600000 -- (-955.026) (-941.347) (-953.322) [-939.701] -- 0:03:55
1610000 -- (-960.395) (-959.308) [-952.808] (-956.877) -- 0:03:49
1620000 -- (-945.370) (-944.677) [-956.473] (-948.310) -- 0:03:43
1630000 -- (-943.516) (-968.468) [-939.168] (-966.979) -- 0:03:37
1640000 -- [-936.031] (-941.108) (-963.489) (-957.033) -- 0:03:31
1650000 -- (-959.348) (-940.399) [-947.727] (-941.791) -- 0:03:25
1660000 -- (-967.826) (-940.735) (-955.878) [-943.745] -- 0:03:19
1670000 -- (-948.996) (-949.344) [-944.915] (-958.872) -- 0:03:13
1680000 -- (-948.518) (-948.038) (-938.160) [-937.832] -- 0:03:07
1690000 -- (-939.468) [-941.043] (-942.795) (-949.851) -- 0:03:01
1700000 -- (-967.394) [-945.524] (-953.463) (-949.781) -- 0:02:55
1710000 -- (-953.447) (-940.040) [-931.270] (-940.059) -- 0:02:49
1720000 -- (-930.857) (-948.984) [-933.560] (-966.618) -- 0:02:44
1730000 -- (-945.393) [-934.088] (-962.576) (-948.582) -- 0:02:38
1740000 -- [-939.481] (-933.005) (-929.867) (-959.968) -- 0:02:32
1750000 -- (-943.706) (-955.810) [-957.021] (-952.004) -- 0:02:26
1760000 -- (-940.840) (-943.904) [-947.896] (-956.705) -- 0:02:20
1770000 -- (-949.227) (-940.314) (-947.551) [-931.106] -- 0:02:14
1780000 -- (-945.167) [-942.012] (-942.807) (-957.950) -- 0:02:08
1790000 -- [-937.575] (-953.041) (-949.270) (-945.022) -- 0:02:02
1800000 -- (-948.111) [-942.833] (-961.864) (-940.360) -- 0:01:56
1810000 -- (-952.176) (-953.928) (-953.776) [-935.684] -- 0:01:51
1820000 -- (-944.427) (-939.725) (-942.434) [-943.967] -- 0:01:45
1830000 -- [-946.194] (-955.043) (-968.386) (-946.043) -- 0:01:39
1840000 -- [-945.126] (-941.489) (-952.311) (-961.573) -- 0:01:33
1850000 -- (-940.284) [-939.721] (-936.626) (-961.766) -- 0:01:27
1860000 -- (-949.464) (-934.013) (-953.510) [-943.063] -- 0:01:21
1870000 -- (-956.328) (-950.925) (-931.317) [-938.571] -- 0:01:15
1880000 -- (-947.882) [-942.491] (-967.223) (-951.251) -- 0:01:10
1890000 -- (-957.727) [-936.348] (-944.914) (-943.402) -- 0:01:04
1900000 -- (-944.964) (-952.184) (-965.366) [-934.786] -- 0:00:58
1910000 -- (-959.411) [-943.075] (-944.435) (-943.762) -- 0:00:52
1920000 -- [-933.605] (-936.004) (-954.864) (-947.715) -- 0:00:46
1930000 -- (-955.836) (-947.938) [-941.532] (-959.244) -- 0:00:40
1940000 -- (-949.072) [-930.812] (-952.141) (-942.085) -- 0:00:34
1950000 -- (-947.068) [-938.693] (-947.294) (-947.478) -- 0:00:29
1960000 -- (-943.164) (-933.278) (-941.903) [-931.363] -- 0:00:23
1970000 -- (-942.522) (-958.734) [-947.760] (-945.780) -- 0:00:17
1980000 -- [-934.918] (-962.867) (-946.354) (-935.704) -- 0:00:11
1990000 -- [-938.773] (-932.182) (-952.449) (-948.470) -- 0:00:05
2000000 -- (-937.128) [-940.276] (-935.883) (-953.540) -- 0:00:00

```

Continue with analysis? (yes/no): n

Analysis completed in 19 mins 24 seconds

Analysis used 1070.60 seconds of CPU time

Log likelihood of best state for "cold" chain was -919.19

Acceptance rates for the moves in the "cold" chain:

| With prob. | (last 100) | chain accepted proposals by move |
|------------|------------|----------------------------------|
| 40.1 %     | ( 33 %)    | Multiplier(Alpha)                |
| 18.6 %     | ( 14 %)    | ExtSprClock(Tau,V)               |
| 44.8 %     | ( 54 %)    | NNIClock(Tau,V)                  |
| 15.5 %     | ( 10 %)    | ParsSPRClock(Tau,V)              |
| 70.3 %     | ( 69 %)    | NodesliderClock(V)               |
| 70.6 %     | ( 24 %)    | TreeStretch(V)                   |

Chain swap information:



|   | 1      | 2      | 3      | 4    |
|---|--------|--------|--------|------|
| 1 |        | 0.53   | 0.25   | 0.11 |
| 2 | 333780 |        | 0.60   | 0.32 |
| 3 | 332922 | 333333 |        | 0.64 |
| 4 | 333623 | 333364 | 332978 |      |

Upper diagonal: Proportion of successful state exchanges between chains  
Lower diagonal: Number of attempted state exchanges between chains

Chain information:

```
ID -- Heat
-----
1 -- 1.00 (cold chain)
2 -- 0.91
3 -- 0.83
4 -- 0.77
```

Heat =  $1 / (1 + T * (ID - 1))$   
(where T = 0.10 is the temperature and ID is the chain number)

MrBayes > sumt reldburnin=yes

```
Using relative burnin (a fraction of samples discarded).
Summarizing trees in file "DY-26Dec-strict-Yout.t"
Using relative burnin ('reldburnin=yes'), discarding the first 25 % of sampled trees
Writing statistics to files DY-26Dec-strict-Yout.<parts|tstat|vstat|trprobs|con>
Examining file ...
Found one tree block in file "DY-26Dec-strict-Yout.t" with 4001 trees in last block
```

Tree reading status:

```
0      10      20      30      40      50      60      70      80      90     100
V-----V-----V-----V-----V-----V-----V-----V-----V-----V
*****
```

Read 4001 trees from last tree block (sampling 3001 of them)

General explanation:

In an unrooted tree, a taxon bipartition (split) is specified by removing a branch, thereby dividing the species into those to the left and those to the right of the branch. Here, taxa to one side of the removed branch are denoted '.' and those to the other side are denoted '\*'. Specifically, the '.' symbol is used for the taxa on the same side as the outgroup.

In a rooted or clock tree, the tree is rooted using the model and not by reference to an outgroup. Each bipartition therefore corresponds to a clade, that is, a group that includes all the descendants of a particular branch in the tree. Taxa that are included in each clade are denoted using '\*', and taxa that are not included are denoted using the '.' symbol.

The output first includes a key to all the bipartitions with frequency larger or equal to (Minpartfreq) in at least one run. Minpartfreq is a parameter to sumt command and currently it is set to 0.10. This is followed by a table with statistics for the informative bipartitions (those including at least two taxa), sorted from highest to lowest probability. For each bipartition, the table gives the number of times the partition or split was observed in all runs (#obs) and the posterior probability of the bipartition (Probab.), which

is the same as the split frequency. If several runs are summarized, this is followed by the minimum split frequency (Min(s)), the maximum frequency (Max(s)), and the standard deviation of frequencies (Stddev(s)) across runs. The latter value should approach 0 for all bipartitions as MCMC runs converge.

This is followed by a table summarizing branch lengths, node heights (if a clock model was used) and relaxed clock parameters (if a relaxed clock model was used). The mean, variance, and 95 % credible interval are given for each of these parameters. If several runs are summarized, the potential scale reduction factor (PSRF) is also given; it should approach 1 as runs converge. Node heights will take calibration points into account, if such points were used in the analysis.

Note that Stddev may be unreliable if the partition is not present in all runs (the last column indicates the number of runs that sampled the partition if more than one run is summarized). The PSRF is not calculated at all if the partition is not present in all runs. The PSRF is also sensitive to small sample sizes and it should only be considered a rough guide to convergence since some of the assumptions allowing one to interpret it as a true potential scale reduction factor are violated in MrBayes.

List of taxa in bipartitions:

- 1 -- gwi
- 2 -- dgr
- 3 -- scsh
- 4 -- xsl
- 5 -- bea
- 6 -- crx
- 7 -- chp
- 8 -- txc
- 9 -- haa
- 10 -- ing
- 11 -- kuu
- 12 -- hoi
- 13 -- koy
- 14 -- taa
- 15 -- aht
- 16 -- tfn
- 17 -- kkz
- 18 -- tcb
- 19 -- tau
- 20 -- ttmN
- 21 -- tceS
- 22 -- eya
- 23 -- tli
- 24 -- gce
- 25 -- tol
- 26 -- cco
- 27 -- hup
- 28 -- mtl
- 29 -- wlk
- 30 -- kto
- 31 -- apc
- 32 -- apw
- 33 -- apj
- 34 -- nav
- 35 -- apk
- 36 -- apl
- 37 -- srs
- 38 -- ket

Key to taxon bipartitions (saved to file "DY-26Dec-strict-Yout.parts"):

```
ID -- Partition
-----
0 -- *****
1 -- *.....
2 -- .*.....
3 -- ..*.....
4 -- ...*.....
5 -- ....*.....
6 -- .....*.....
7 -- .....*.....
8 -- .....*.....
9 -- .....*.....
10 -- .....*.....
11 -- .....*.....
12 -- .....*.....
13 -- .....*.....
14 -- .....*.....
15 -- .....*.....
16 -- .....*.....
17 -- .....*.....
18 -- .....*.....
19 -- .....*.....
20 -- .....*.....
21 -- .....*.....
22 -- .....*.....
23 -- .....*.....
24 -- .....*.....
25 -- .....*.....
26 -- .....*.....
27 -- .....*.....
28 -- .....*.....
29 -- .....*.....
30 -- .....*.....
31 -- .....*.....
32 -- .....*.....
33 -- .....*.....
34 -- .....*.....
35 -- .....*.....
36 -- .....*.....
37 -- .....*.....
38 -- .....*.....
39 -- .....*.....
40 -- *****
41 -- .....**
42 -- .....**
43 -- .....*****
44 -- .....**
45 -- .....* **
46 -- .....****
47 -- .....****
48 -- .....**
49 -- .....* **
50 -- .....*****
51 -- .....* * * * *
52 -- .....***
53 -- .....**
54 -- .....*
```

55 -- .....\*\*  
56 -- .....\*\*  
57 -- .....\*\*  
58 -- \*\*\*\*\* \* \* \*\*\*\*\*  
59 -- .....\*\*\*  
60 -- .....\* .....\*\*  
61 -- .....\* \* \* \* \* .....\*\*  
62 -- .....\* \* .....  
63 -- .....\*\*  
64 -- \*\*\*\*\* .....  
65 -- .....\*\*  
66 -- \*\*\*\*\* .....  
67 -- .....\*\*\*  
68 -- .....\*\*\*  
69 -- \*\* .....  
70 -- .....\*\*  
71 -- .....\* \*\*  
72 -- .....\*\*  
73 -- .....\*\*  
74 -- \*\* .....  
75 -- .....\* \*\*  
76 -- \*\*\*\*\* .....  
77 -- .....\* \* \*\* \* \* .....  
78 -- .....\* \* .....  
79 -- .....\* \* .....  
80 -- \*\*\*\*\* .....  
81 -- .....\* .....\* .....\* .....  
82 -- .....\* \* \* \* \* .....\*\*  
83 -- .....\* .....\*\*\*\*\*  
84 -- .....\* \* \*\* .....  
85 -- .....\* \* .....  
86 -- .....\* .....\* .....  
87 -- .....\* .....\* .....  
88 -- .....\*\*\* .....\*\*\*\*\*  
89 -- .....\*\* .....  
90 -- .....\* \*\* .....  
91 -- \*\*\*\*\* \* \* ..... \*\*\*\*\* .....  
92 -- \*\*\* \* .....  
93 -- \*\*\*\*\* ..... \*\*\*\*\* .....  
94 -- .....\* .....\* .....  
95 -- .....\* \* .....\* \*\* .....  
96 -- .....\*\*\* .....  
97 -- .....\* .....\* .....  
98 -- \*\*\*\*\* ..... \*\*\*\*\* .....  
99 -- .....\*\*\*\* .....\* .....  
100 -- .....\* \* .....  
101 -- .....\* \* .....\*\* .....  
102 -- .....\* \* .....  
103 -- .....\*\* \* .....  
104 -- \*\*\*\*\* .....\* .....\*\*\*\*\* .....  
105 -- .....\*\* .....  
106 -- \*\*\*\*\* \*\* \* \* ..... \*\*\*\*\*  
107 -- .....\* \* .....\*\* .....  
108 -- .....\* \* .....\*\* .....  
109 -- \*\*\* .....  
110 -- .....\* .....\* .....  
111 -- .....\* .....\* .....  
112 -- .....\*\*\*\*\* .....  
113 -- .....\* .....\* .....  
-----

Summary statistics for informative taxon bipartitions (clades)  
(saved to file "DY-26Dec-strict-Yout.tstat"):

| ID | #obs | Probab.  |
|----|------|----------|
| 40 | 3001 | 1.000000 |
| 41 | 3001 | 1.000000 |
| 42 | 3000 | 0.999667 |
| 43 | 2767 | 0.922026 |
| 44 | 2696 | 0.898367 |
| 45 | 2622 | 0.873709 |
| 46 | 2539 | 0.846051 |
| 47 | 2522 | 0.840387 |
| 48 | 2518 | 0.839054 |
| 49 | 2396 | 0.798401 |
| 50 | 2217 | 0.738754 |
| 51 | 2067 | 0.688770 |
| 52 | 2040 | 0.679773 |
| 53 | 2037 | 0.678774 |
| 54 | 1801 | 0.600133 |
| 55 | 1767 | 0.588804 |
| 56 | 1715 | 0.571476 |
| 57 | 1686 | 0.561813 |
| 58 | 1647 | 0.548817 |
| 59 | 1608 | 0.535821 |
| 60 | 1594 | 0.531156 |
| 61 | 1580 | 0.526491 |
| 62 | 1577 | 0.525492 |
| 63 | 1384 | 0.461180 |
| 64 | 1361 | 0.453515 |
| 65 | 1309 | 0.436188 |
| 66 | 1282 | 0.427191 |
| 67 | 1272 | 0.423859 |
| 68 | 1225 | 0.408197 |
| 69 | 1202 | 0.400533 |
| 70 | 1136 | 0.378540 |
| 71 | 1131 | 0.376874 |
| 72 | 943  | 0.314229 |
| 73 | 869  | 0.289570 |
| 74 | 855  | 0.284905 |
| 75 | 849  | 0.282906 |
| 76 | 822  | 0.273909 |
| 77 | 777  | 0.258914 |
| 78 | 768  | 0.255915 |
| 79 | 756  | 0.251916 |
| 80 | 741  | 0.246918 |
| 81 | 690  | 0.229923 |
| 82 | 609  | 0.202932 |
| 83 | 606  | 0.201933 |
| 84 | 589  | 0.196268 |
| 85 | 585  | 0.194935 |
| 86 | 564  | 0.187937 |
| 87 | 554  | 0.184605 |
| 88 | 553  | 0.184272 |
| 89 | 550  | 0.183272 |
| 90 | 533  | 0.177607 |
| 91 | 532  | 0.177274 |
| 92 | 526  | 0.175275 |
| 93 | 520  | 0.173276 |
| 94 | 498  | 0.165945 |
| 95 | 481  | 0.160280 |

```

96 471 0.156948
97 417 0.138954
98 384 0.127957
99 363 0.120960
100 358 0.119294
101 357 0.118960
102 355 0.118294
103 353 0.117627
104 351 0.116961
105 351 0.116961
106 347 0.115628
107 347 0.115628
108 344 0.114628
109 341 0.113629
110 328 0.109297
111 327 0.108964
112 326 0.108630
113 326 0.108630
-----

```

Summary statistics for branch and node parameters  
(saved to file "DY-26Dec-strict-Yout.vstat"):

| Parameter  | Mean     | Variance | 95% HPD Interval |          | Median   |
|------------|----------|----------|------------------|----------|----------|
|            |          |          | Lower            | Upper    |          |
| length[1]  | 0.048019 | 0.000374 | 0.012385         | 0.084269 | 0.046128 |
| length[2]  | 0.050230 | 0.000529 | 0.012989         | 0.098331 | 0.046047 |
| length[3]  | 0.043713 | 0.000352 | 0.011244         | 0.080542 | 0.041384 |
| length[4]  | 0.034120 | 0.000235 | 0.007774         | 0.063780 | 0.032147 |
| length[5]  | 0.042629 | 0.000654 | 0.007309         | 0.098330 | 0.036828 |
| length[6]  | 0.032730 | 0.000234 | 0.008190         | 0.062968 | 0.030478 |
| length[7]  | 0.043334 | 0.000253 | 0.015299         | 0.074194 | 0.041820 |
| length[8]  | 0.098497 | 0.000888 | 0.038457         | 0.152049 | 0.098401 |
| length[9]  | 0.047581 | 0.000233 | 0.018304         | 0.077108 | 0.047113 |
| length[10] | 0.047953 | 0.000478 | 0.011545         | 0.089664 | 0.044194 |
| length[11] | 0.077381 | 0.000905 | 0.021743         | 0.138188 | 0.075436 |
| length[12] | 0.035402 | 0.000248 | 0.007991         | 0.066125 | 0.033154 |
| length[13] | 0.036355 | 0.000273 | 0.007897         | 0.067311 | 0.033864 |
| length[14] | 0.027673 | 0.000214 | 0.005571         | 0.058083 | 0.024950 |
| length[15] | 0.094470 | 0.000881 | 0.039486         | 0.152294 | 0.094379 |
| length[16] | 0.091397 | 0.000887 | 0.035261         | 0.147808 | 0.091357 |
| length[17] | 0.036138 | 0.000258 | 0.009314         | 0.067995 | 0.034239 |
| length[18] | 0.024711 | 0.000170 | 0.004349         | 0.049862 | 0.022045 |
| length[19] | 0.030469 | 0.000239 | 0.005634         | 0.061502 | 0.027956 |
| length[20] | 0.033689 | 0.000195 | 0.010236         | 0.062464 | 0.032016 |
| length[21] | 0.035897 | 0.000223 | 0.009668         | 0.064411 | 0.034185 |
| length[22] | 0.097014 | 0.001172 | 0.037673         | 0.165628 | 0.093576 |
| length[23] | 0.099618 | 0.001388 | 0.033374         | 0.172188 | 0.094912 |
| length[24] | 0.087039 | 0.001057 | 0.032204         | 0.154714 | 0.083948 |
| length[25] | 0.075774 | 0.000895 | 0.025982         | 0.137985 | 0.071399 |
| length[26] | 0.083066 | 0.000993 | 0.025470         | 0.143234 | 0.080296 |
| length[27] | 0.090926 | 0.001201 | 0.027278         | 0.159159 | 0.086512 |
| length[28] | 0.085646 | 0.001044 | 0.023525         | 0.149109 | 0.081732 |
| length[29] | 0.044674 | 0.000420 | 0.011405         | 0.084643 | 0.041759 |
| length[30] | 0.046055 | 0.000510 | 0.011240         | 0.091675 | 0.042223 |
| length[31] | 0.008930 | 0.000063 | 0.000006         | 0.024855 | 0.006662 |
| length[32] | 0.008922 | 0.000062 | 0.000006         | 0.024552 | 0.006644 |
| length[33] | 0.014789 | 0.000096 | 0.000359         | 0.033375 | 0.012848 |
| length[34] | 0.028931 | 0.000173 | 0.006547         | 0.053453 | 0.027011 |

|            |          |          |          |          |          |
|------------|----------|----------|----------|----------|----------|
| length[35] | 0.005296 | 0.000029 | 0.000003 | 0.016085 | 0.003673 |
| length[36] | 0.005295 | 0.000029 | 0.000003 | 0.016085 | 0.003673 |
| length[37] | 0.065006 | 0.000574 | 0.023191 | 0.112532 | 0.062697 |
| length[38] | 0.082629 | 0.000685 | 0.029604 | 0.130430 | 0.080783 |
| length[39] | 0.082629 | 0.000685 | 0.029604 | 0.130430 | 0.080783 |
| length[40] | 0.015233 | 0.000188 | 0.000033 | 0.042705 | 0.011254 |
| length[41] | 0.100513 | 0.000891 | 0.041529 | 0.158148 | 0.099646 |
| length[42] | 0.038389 | 0.000276 | 0.007112 | 0.070377 | 0.037017 |
| length[43] | 0.042779 | 0.000500 | 0.000046 | 0.083674 | 0.040379 |
| length[44] | 0.055368 | 0.000791 | 0.004774 | 0.107841 | 0.052653 |
| length[45] | 0.026570 | 0.000212 | 0.000607 | 0.053665 | 0.024396 |
| length[46] | 0.054482 | 0.000800 | 0.004102 | 0.108383 | 0.051798 |
| length[47] | 0.019756 | 0.000169 | 0.000598 | 0.046417 | 0.017162 |
| length[48] | 0.038371 | 0.000530 | 0.002140 | 0.081966 | 0.035095 |
| length[49] | 0.031431 | 0.000401 | 0.001405 | 0.072738 | 0.027591 |
| length[50] | 0.026179 | 0.000319 | 0.000044 | 0.059619 | 0.022812 |
| length[51] | 0.021532 | 0.000139 | 0.000729 | 0.044020 | 0.019821 |
| length[52] | 0.015401 | 0.000135 | 0.000003 | 0.036953 | 0.013223 |
| length[53] | 0.023205 | 0.000301 | 0.000051 | 0.055923 | 0.019721 |
| length[54] | 0.019928 | 0.000164 | 0.000360 | 0.043855 | 0.017711 |
| length[55] | 0.012946 | 0.000094 | 0.000004 | 0.032079 | 0.011010 |
| length[56] | 0.026804 | 0.000323 | 0.000098 | 0.062123 | 0.023185 |
| length[57] | 0.019686 | 0.000217 | 0.000052 | 0.047390 | 0.015915 |
| length[58] | 0.028779 | 0.000247 | 0.000101 | 0.056998 | 0.026723 |
| length[59] | 0.034202 | 0.000483 | 0.000062 | 0.077597 | 0.030534 |
| length[60] | 0.012524 | 0.000078 | 0.000027 | 0.030315 | 0.010607 |
| length[61] | 0.017483 | 0.000149 | 0.000040 | 0.040461 | 0.015166 |
| length[62] | 0.012607 | 0.000109 | 0.000051 | 0.033104 | 0.009986 |
| length[63] | 0.038788 | 0.000689 | 0.000175 | 0.089016 | 0.033689 |
| length[64] | 0.017258 | 0.000140 | 0.000021 | 0.039979 | 0.015023 |
| length[65] | 0.013889 | 0.000122 | 0.000002 | 0.035238 | 0.011429 |
| length[66] | 0.018661 | 0.000164 | 0.000095 | 0.043868 | 0.015718 |
| length[67] | 0.035299 | 0.000652 | 0.000041 | 0.084239 | 0.029609 |
| length[68] | 0.032652 | 0.000422 | 0.000092 | 0.070390 | 0.030493 |
| length[69] | 0.024231 | 0.000245 | 0.000014 | 0.054359 | 0.021549 |
| length[70] | 0.036348 | 0.000562 | 0.000155 | 0.080607 | 0.032760 |
| length[71] | 0.029276 | 0.000442 | 0.000065 | 0.069815 | 0.024828 |
| length[72] | 0.013899 | 0.000168 | 0.000056 | 0.040138 | 0.010248 |
| length[73] | 0.028093 | 0.000406 | 0.000029 | 0.064145 | 0.024507 |
| length[74] | 0.022612 | 0.000199 | 0.000098 | 0.049096 | 0.020718 |
| length[75] | 0.021048 | 0.000280 | 0.000105 | 0.054404 | 0.017250 |
| length[76] | 0.016613 | 0.000167 | 0.000076 | 0.042528 | 0.013884 |
| length[77] | 0.025208 | 0.000200 | 0.003817 | 0.053030 | 0.022373 |
| length[78] | 0.020315 | 0.000202 | 0.000066 | 0.045146 | 0.017497 |
| length[79] | 0.013234 | 0.000149 | 0.000056 | 0.036768 | 0.009841 |
| length[80] | 0.014984 | 0.000116 | 0.000168 | 0.034014 | 0.012560 |
| length[81] | 0.009515 | 0.000067 | 0.000049 | 0.026433 | 0.007322 |
| length[82] | 0.022697 | 0.000287 | 0.000079 | 0.057042 | 0.018823 |
| length[83] | 0.025407 | 0.000279 | 0.000014 | 0.056485 | 0.022031 |
| length[84] | 0.021671 | 0.000214 | 0.000001 | 0.048279 | 0.018881 |
| length[85] | 0.007412 | 0.000051 | 0.000006 | 0.020630 | 0.005538 |
| length[86] | 0.007471 | 0.000058 | 0.000006 | 0.022737 | 0.005196 |
| length[87] | 0.007702 | 0.000055 | 0.000002 | 0.022872 | 0.005376 |
| length[88] | 0.020505 | 0.000200 | 0.000055 | 0.047507 | 0.017428 |
| length[89] | 0.007775 | 0.000055 | 0.000015 | 0.021750 | 0.005669 |
| length[90] | 0.018841 | 0.000228 | 0.000058 | 0.048340 | 0.015343 |
| length[91] | 0.016014 | 0.000121 | 0.000270 | 0.037523 | 0.013499 |
| length[92] | 0.019608 | 0.000223 | 0.000042 | 0.047617 | 0.016453 |
| length[93] | 0.014640 | 0.000114 | 0.000083 | 0.035698 | 0.012171 |
| length[94] | 0.020340 | 0.000314 | 0.000000 | 0.054471 | 0.015342 |
| length[95] | 0.007781 | 0.000059 | 0.000004 | 0.023178 | 0.005455 |

|             |          |          |          |          |          |
|-------------|----------|----------|----------|----------|----------|
| length[96]  | 0.014836 | 0.000123 | 0.000146 | 0.036064 | 0.012021 |
| length[97]  | 0.007722 | 0.000067 | 0.000002 | 0.025652 | 0.005010 |
| length[98]  | 0.011334 | 0.000069 | 0.000078 | 0.027048 | 0.009232 |
| length[99]  | 0.031997 | 0.000343 | 0.000752 | 0.065665 | 0.029096 |
| length[100] | 0.008762 | 0.000073 | 0.000088 | 0.025437 | 0.006355 |
| length[101] | 0.017243 | 0.000188 | 0.000278 | 0.044028 | 0.013108 |
| length[102] | 0.021578 | 0.000284 | 0.000136 | 0.053594 | 0.018178 |
| length[103] | 0.007575 | 0.000064 | 0.000006 | 0.023018 | 0.004943 |
| length[104] | 0.018035 | 0.000162 | 0.000342 | 0.044510 | 0.015812 |
| length[105] | 0.017165 | 0.000315 | 0.000005 | 0.052348 | 0.011462 |
| length[106] | 0.015828 | 0.000155 | 0.000031 | 0.041464 | 0.013052 |
| length[107] | 0.006146 | 0.000040 | 0.000010 | 0.019642 | 0.004216 |
| length[108] | 0.011048 | 0.000080 | 0.000061 | 0.027799 | 0.008875 |
| length[109] | 0.012929 | 0.000152 | 0.000008 | 0.038329 | 0.009130 |
| length[110] | 0.018592 | 0.000159 | 0.000017 | 0.041913 | 0.016385 |
| length[111] | 0.024416 | 0.000405 | 0.000060 | 0.061403 | 0.019069 |
| length[112] | 0.020929 | 0.000245 | 0.000073 | 0.054000 | 0.017564 |
| length[113] | 0.019135 | 0.000217 | 0.000014 | 0.045780 | 0.016715 |
| height[0]   | 0.183142 | 0.001638 | 0.087549 | 0.254876 | 0.186298 |
| height[1]   | 0.000000 | 0.000000 | 0.000000 | 0.000000 | 0.000000 |
| height[2]   | 0.000000 | 0.000000 | 0.000000 | 0.000000 | 0.000000 |
| height[3]   | 0.000000 | 0.000000 | 0.000000 | 0.000000 | 0.000000 |
| height[4]   | 0.000000 | 0.000000 | 0.000000 | 0.000000 | 0.000000 |
| height[5]   | 0.000000 | 0.000000 | 0.000000 | 0.000000 | 0.000000 |
| height[6]   | 0.000000 | 0.000000 | 0.000000 | 0.000000 | 0.000000 |
| height[7]   | 0.000000 | 0.000000 | 0.000000 | 0.000000 | 0.000000 |
| height[8]   | 0.000000 | 0.000000 | 0.000000 | 0.000000 | 0.000000 |
| height[9]   | 0.000000 | 0.000000 | 0.000000 | 0.000000 | 0.000000 |
| height[10]  | 0.000000 | 0.000000 | 0.000000 | 0.000000 | 0.000000 |
| height[11]  | 0.000000 | 0.000000 | 0.000000 | 0.000000 | 0.000000 |
| height[12]  | 0.000000 | 0.000000 | 0.000000 | 0.000000 | 0.000000 |
| height[13]  | 0.000000 | 0.000000 | 0.000000 | 0.000000 | 0.000000 |
| height[14]  | 0.000000 | 0.000000 | 0.000000 | 0.000000 | 0.000000 |
| height[15]  | 0.000000 | 0.000000 | 0.000000 | 0.000000 | 0.000000 |
| height[16]  | 0.000000 | 0.000000 | 0.000000 | 0.000000 | 0.000000 |
| height[17]  | 0.000000 | 0.000000 | 0.000000 | 0.000000 | 0.000000 |
| height[18]  | 0.000000 | 0.000000 | 0.000000 | 0.000000 | 0.000000 |
| height[19]  | 0.000000 | 0.000000 | 0.000000 | 0.000000 | 0.000000 |
| height[20]  | 0.000000 | 0.000000 | 0.000000 | 0.000000 | 0.000000 |
| height[21]  | 0.000000 | 0.000000 | 0.000000 | 0.000000 | 0.000000 |
| height[22]  | 0.000000 | 0.000000 | 0.000000 | 0.000000 | 0.000000 |
| height[23]  | 0.000000 | 0.000000 | 0.000000 | 0.000000 | 0.000000 |
| height[24]  | 0.000000 | 0.000000 | 0.000000 | 0.000000 | 0.000000 |
| height[25]  | 0.000000 | 0.000000 | 0.000000 | 0.000000 | 0.000000 |
| height[26]  | 0.000000 | 0.000000 | 0.000000 | 0.000000 | 0.000000 |
| height[27]  | 0.000000 | 0.000000 | 0.000000 | 0.000000 | 0.000000 |
| height[28]  | 0.000000 | 0.000000 | 0.000000 | 0.000000 | 0.000000 |
| height[29]  | 0.000000 | 0.000000 | 0.000000 | 0.000000 | 0.000000 |
| height[30]  | 0.000000 | 0.000000 | 0.000000 | 0.000000 | 0.000000 |
| height[31]  | 0.000000 | 0.000000 | 0.000000 | 0.000000 | 0.000000 |
| height[32]  | 0.000000 | 0.000000 | 0.000000 | 0.000000 | 0.000000 |
| height[33]  | 0.000000 | 0.000000 | 0.000000 | 0.000000 | 0.000000 |
| height[34]  | 0.000000 | 0.000000 | 0.000000 | 0.000000 | 0.000000 |
| height[35]  | 0.000000 | 0.000000 | 0.000000 | 0.000000 | 0.000000 |
| height[36]  | 0.000000 | 0.000000 | 0.000000 | 0.000000 | 0.000000 |
| height[37]  | 0.000000 | 0.000000 | 0.000000 | 0.000000 | 0.000000 |
| height[38]  | 0.000000 | 0.000000 | 0.000000 | 0.000000 | 0.000000 |
| height[39]  | 0.000000 | 0.000000 | 0.000000 | 0.000000 | 0.000000 |
| height[40]  | 0.167909 | 0.001317 | 0.081373 | 0.229592 | 0.171755 |
| height[41]  | 0.082629 | 0.000685 | 0.029604 | 0.130430 | 0.080783 |
| height[42]  | 0.005295 | 0.000029 | 0.000003 | 0.016085 | 0.003673 |



|             |          |          |          |          |          |
|-------------|----------|----------|----------|----------|----------|
| height[43]  | 0.066481 | 0.000417 | 0.026557 | 0.105882 | 0.065416 |
| height[44]  | 0.093881 | 0.001021 | 0.037673 | 0.159094 | 0.091440 |
| height[45]  | 0.033116 | 0.000189 | 0.009595 | 0.061063 | 0.031191 |
| height[46]  | 0.102391 | 0.001026 | 0.042778 | 0.166595 | 0.100010 |
| height[47]  | 0.028533 | 0.000125 | 0.009584 | 0.051721 | 0.027206 |
| height[48]  | 0.041036 | 0.000301 | 0.011369 | 0.074123 | 0.038808 |
| height[49]  | 0.048285 | 0.000327 | 0.015818 | 0.083738 | 0.045882 |
| height[50]  | 0.044176 | 0.000220 | 0.017174 | 0.072169 | 0.042834 |
| height[51]  | 0.065150 | 0.000245 | 0.033008 | 0.095937 | 0.065179 |
| height[52]  | 0.014978 | 0.000068 | 0.001897 | 0.030781 | 0.013598 |
| height[53]  | 0.069300 | 0.000407 | 0.028284 | 0.107602 | 0.069172 |
| height[54]  | 0.029660 | 0.000167 | 0.007284 | 0.054593 | 0.028261 |
| height[55]  | 0.006038 | 0.000032 | 0.000006 | 0.017760 | 0.004275 |
| height[56]  | 0.028693 | 0.000177 | 0.005489 | 0.053387 | 0.026349 |
| height[57]  | 0.031158 | 0.000179 | 0.007897 | 0.057390 | 0.029416 |
| height[58]  | 0.089558 | 0.000362 | 0.049131 | 0.126202 | 0.090132 |
| height[59]  | 0.094737 | 0.000763 | 0.041322 | 0.147139 | 0.093611 |
| height[60]  | 0.039682 | 0.000156 | 0.016490 | 0.065003 | 0.038708 |
| height[61]  | 0.054537 | 0.000230 | 0.022797 | 0.082004 | 0.054715 |
| height[62]  | 0.022444 | 0.000118 | 0.005005 | 0.044961 | 0.020652 |
| height[63]  | 0.072667 | 0.000687 | 0.023511 | 0.122876 | 0.069770 |
| height[64]  | 0.150508 | 0.001044 | 0.072353 | 0.204358 | 0.153304 |
| height[65]  | 0.029260 | 0.000144 | 0.009668 | 0.053869 | 0.028344 |
| height[66]  | 0.140656 | 0.000767 | 0.081936 | 0.195689 | 0.143319 |
| height[67]  | 0.074506 | 0.000579 | 0.029684 | 0.121958 | 0.072843 |
| height[68]  | 0.075365 | 0.000549 | 0.029981 | 0.119853 | 0.073731 |
| height[69]  | 0.041171 | 0.000285 | 0.011326 | 0.072419 | 0.039508 |
| height[70]  | 0.067330 | 0.000550 | 0.025042 | 0.111354 | 0.066585 |
| height[71]  | 0.076314 | 0.000603 | 0.028932 | 0.122504 | 0.074988 |
| height[72]  | 0.023432 | 0.000150 | 0.004356 | 0.048067 | 0.020790 |
| height[73]  | 0.079767 | 0.000637 | 0.032454 | 0.126123 | 0.078404 |
| height[74]  | 0.040709 | 0.000248 | 0.012978 | 0.073608 | 0.039228 |
| height[75]  | 0.048123 | 0.000264 | 0.014921 | 0.076852 | 0.047198 |
| height[76]  | 0.127393 | 0.000859 | 0.057519 | 0.173912 | 0.130760 |
| height[77]  | 0.077643 | 0.000466 | 0.036648 | 0.119126 | 0.077535 |
| height[78]  | 0.032515 | 0.000176 | 0.011618 | 0.059946 | 0.030826 |
| height[79]  | 0.035833 | 0.000219 | 0.012425 | 0.067251 | 0.033711 |
| height[80]  | 0.122428 | 0.000711 | 0.067489 | 0.176501 | 0.124422 |
| height[81]  | 0.045036 | 0.000189 | 0.016559 | 0.069046 | 0.044812 |
| height[82]  | 0.064196 | 0.000385 | 0.027431 | 0.101606 | 0.063986 |
| height[83]  | 0.092099 | 0.000568 | 0.041530 | 0.136175 | 0.092127 |
| height[84]  | 0.055955 | 0.000260 | 0.021386 | 0.086542 | 0.055506 |
| height[85]  | 0.009033 | 0.000042 | 0.000579 | 0.022113 | 0.007801 |
| height[86]  | 0.036777 | 0.000182 | 0.013609 | 0.063915 | 0.035280 |
| height[87]  | 0.035356 | 0.000153 | 0.012215 | 0.058953 | 0.033885 |
| height[88]  | 0.115153 | 0.000671 | 0.060249 | 0.164516 | 0.116463 |
| height[89]  | 0.008526 | 0.000035 | 0.000145 | 0.020558 | 0.007203 |
| height[90]  | 0.049973 | 0.000248 | 0.017945 | 0.079136 | 0.049378 |
| height[91]  | 0.110590 | 0.000582 | 0.057274 | 0.154344 | 0.111678 |
| height[92]  | 0.057250 | 0.000317 | 0.023696 | 0.089045 | 0.055594 |
| height[93]  | 0.162172 | 0.000987 | 0.096265 | 0.222731 | 0.164429 |
| height[94]  | 0.088287 | 0.000755 | 0.036193 | 0.134163 | 0.087953 |
| height[95]  | 0.049884 | 0.000195 | 0.024840 | 0.078307 | 0.049030 |
| height[96]  | 0.045371 | 0.000212 | 0.018361 | 0.072299 | 0.045225 |
| height[97]  | 0.025406 | 0.000146 | 0.005634 | 0.048365 | 0.023209 |
| height[98]  | 0.138191 | 0.001087 | 0.062999 | 0.191624 | 0.140927 |
| height[99]  | 0.086759 | 0.000547 | 0.041920 | 0.128979 | 0.085942 |
| height[100] | 0.037749 | 0.000217 | 0.011230 | 0.065227 | 0.035481 |
| height[101] | 0.100380 | 0.000585 | 0.050811 | 0.146473 | 0.101642 |
| height[102] | 0.075899 | 0.000651 | 0.030729 | 0.124125 | 0.074569 |
| height[103] | 0.022240 | 0.000073 | 0.008026 | 0.039545 | 0.020861 |



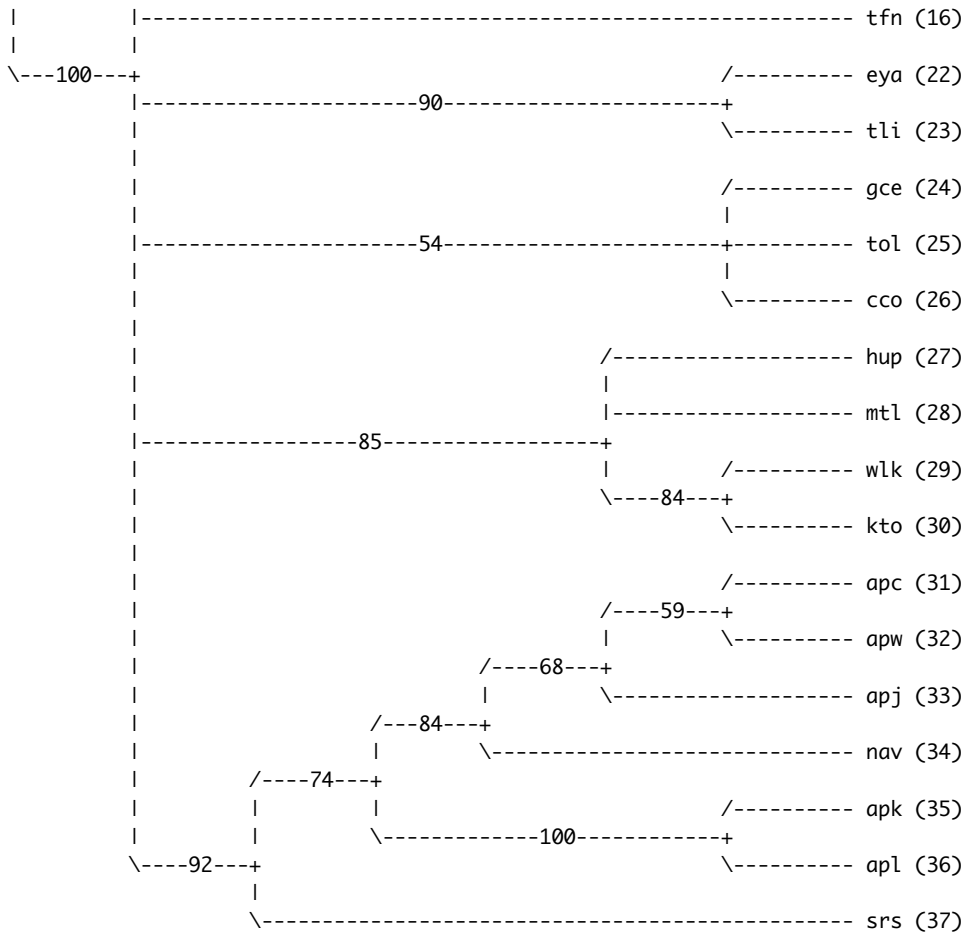

Phylogram (based on median node depths):

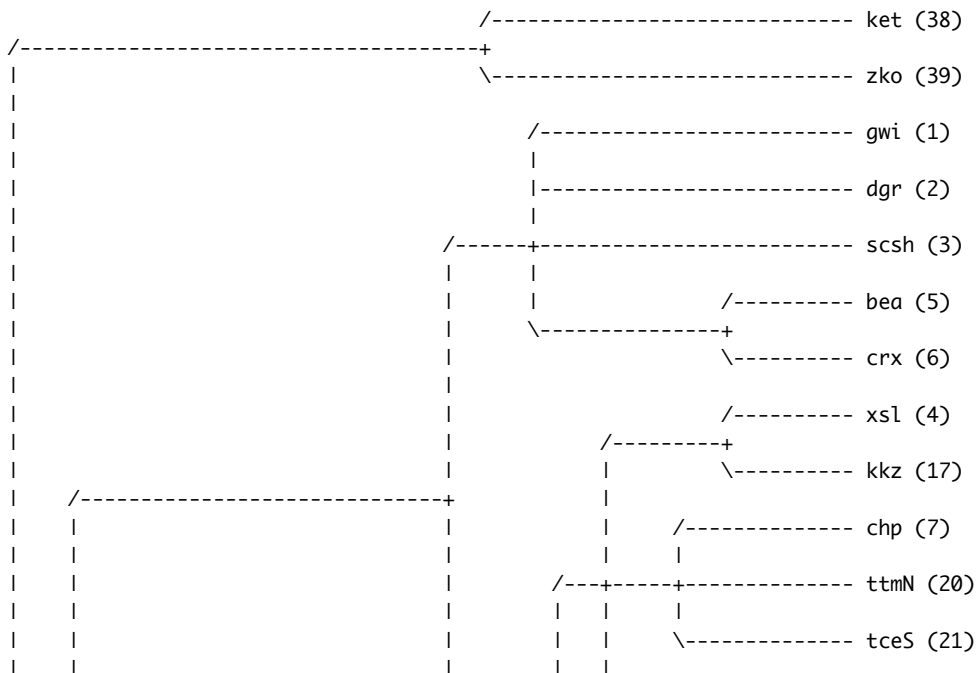

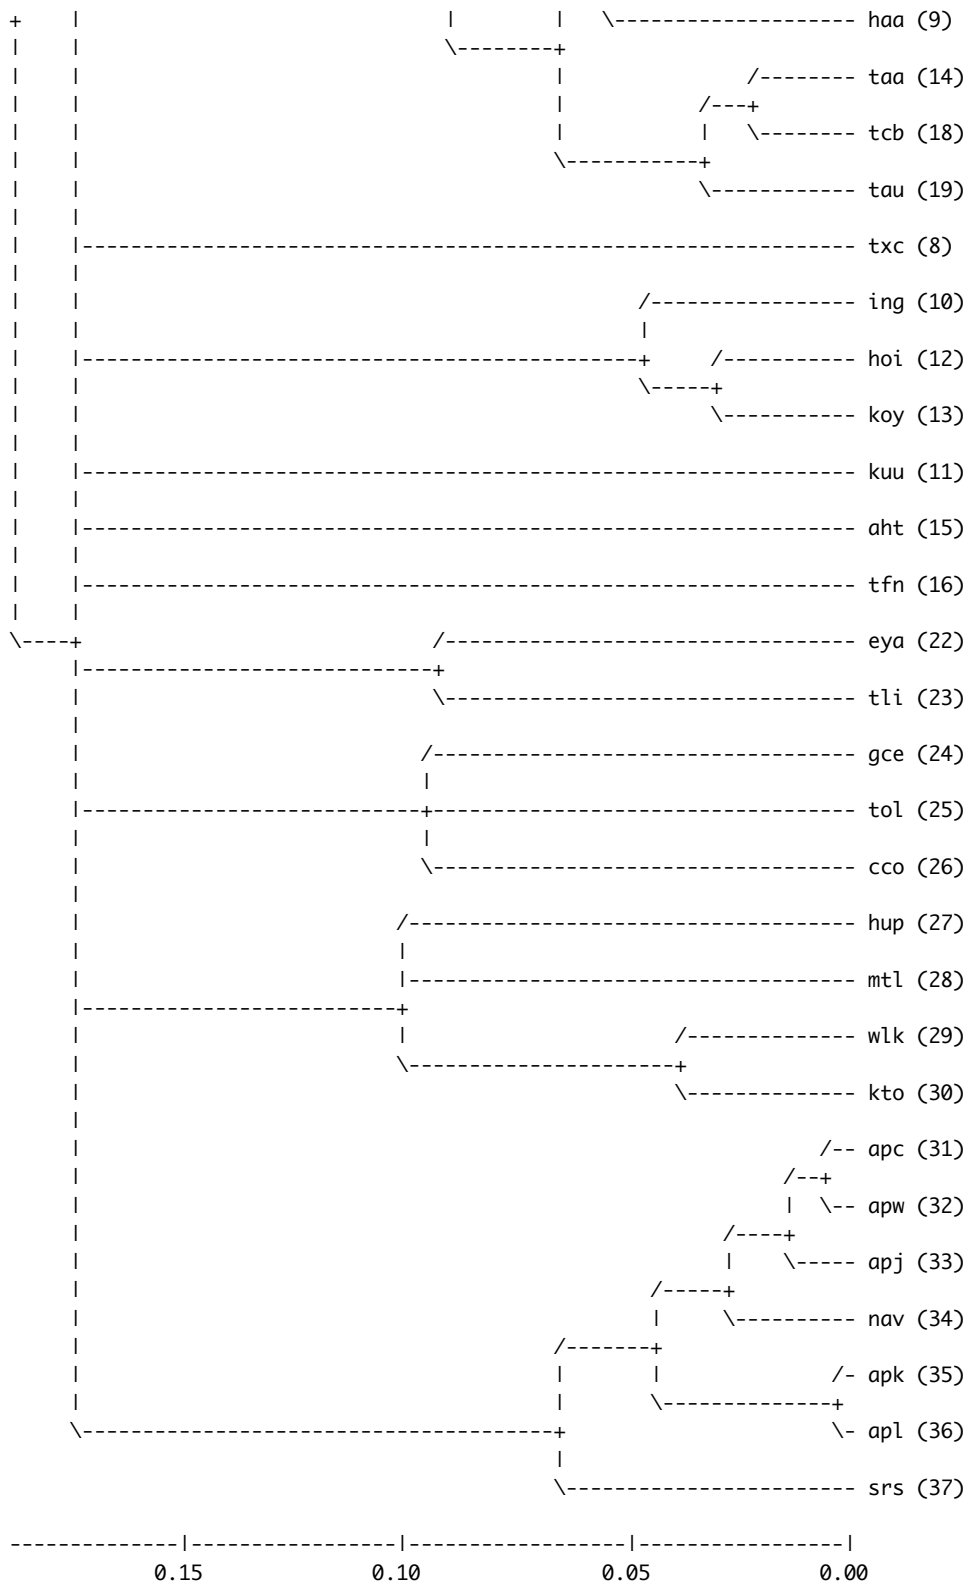

[Expected changes per site]

Calculating tree probabilities...

Credible sets of trees (3001 trees sampled):

- 50 % credible set contains 1501 trees
- 90 % credible set contains 2701 trees
- 95 % credible set contains 2851 trees
- 99 % credible set contains 2971 trees

MrBayes > sump relburnin=yes

Using relative burnin (a fraction of samples discarded).  
Summarizing parameters in file DY-26Dec-strict-Yout.p  
Writing summary statistics to file DY-26Dec-strict-Yout.pstat  
Using relative burnin ('relburnin=yes'), discarding the first 25 % of samples

Below is a rough plot of the generation (x-axis) versus the log probability of observing the data (y-axis). You can use this graph to determine what the burn in for your analysis should be. When the log probability starts to plateau you may be at stationarity. Sample trees and parameters after the log probability plateaus. Of course, this is not a guarantee that you are at stationarity. When the log probability starts to plateau different random trees; if the inferences you make for independent analyses are the same, this is reasonable evidence that the chains have converged. You can use MrBayes to run several independent analyses simultaneously. During such a run, MrBayes will monitor the convergence of topologies. After the run has been completed, the 'sumt' and 'sump' functions will provide additional convergence diagnostics for all the parameters in your model. Remember that the burn in is the number of samples to discard. There are a total of ngen / samplefreq samples taken during a MCMC analysis.

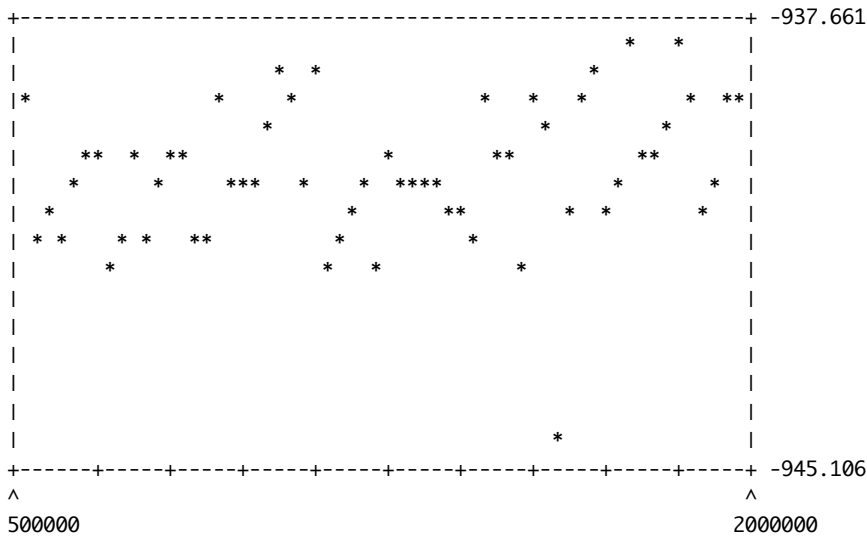

Estimated marginal likelihoods for run sampled in file "DY-26Dec-strict-Yout.p":  
(Use the harmonic mean for Bayes factor comparisons of models)  
(Values are saved to the file /Users/msicoli/Yeniseian-NaDene-Typtological\_noHAX.nex.lstat)

| Arithmetic mean | Harmonic mean |
|-----------------|---------------|
| -928.25         | -957.98       |

Model parameter summaries for run sampled in file "DY-26Dec-strict-Yout":  
 Based on a total of 3001 samples out of a total of 4001 samples  
 from this analysis.

Parameter summaries saved to file "/Users/msicoli/Yeniseian-NaDene-Typological\_noHAX.nex.pstat".

| Parameter | Mean     | Variance   | 95% HPD Interval |           | Median   | ESS*    |
|-----------|----------|------------|------------------|-----------|----------|---------|
|           |          |            | Lower            | Upper     |          |         |
| TH        | 0.183142 | 0.001638   | 0.087549         | 0.254876  | 0.186298 | 283.23  |
| TL        | 2.917361 | 0.341884   | 1.479322         | 3.862267  | 3.003610 | 258.33  |
| alpha     | 7.814915 | 618.921256 | 0.128622         | 34.662511 | 1.840312 | 2060.16 |

\* Convergence diagnostic (ESS = Estimated Sample Size); ESS value below 100 may indicate that the parameter is undersampled.

```
MrBayes > ssp ngen=100000 diagnfreq=1000 filename=YND-Typ-NoHax-Yout-ss
```

```
Setting number of generations to 100000
Setting diagnosing frequency to 1000
```

```
MrBayes > ss
```

```
Setting chain output file names to "YND-Typ-NoHax-Yout-ss.<p/t>"
Running Markov chain
MCMC stamp = 9313293518
Seed = 500640120
Swapseed = 1325479247
Model settings:
```

```
Data not partitioned --
Datatype = Standard
Coding = Variable
# States = Variable, up to 10
State frequencies are fixed to be equal
Rates = Gamma
Gamma shape parameter is uniformly distributed on the interval (0.00,200.00).
Gamma distribution is approximated using 4 categories.
Likelihood summarized over all rate categories in each generation.
```

```
Active parameters:
```

```
Parameters
-----
Statefreq      1
Shape          2
Ratemultiplier 3
Topology       4
Brlens         5
Clockrate      6
-----

1 -- Parameter = Alpha_symdir
   Type       = Symmetric dirichlet/beta distribution alpha_i parameter
   Prior      = Symmetric dirichlet with fixed(-1.00) variance parameter
```

2 -- Parameter = Alpha  
 Type = Shape of scaled gamma distribution of site rates  
 Prior = Uniform(0.00,200.00)

3 -- Parameter = Ratemultiplier  
 Type = Partition-specific rate multiplier  
 Prior = Fixed(1.0)

4 -- Parameter = Tau  
 Type = Topology  
 Prior = Prior on topologies obeys constraints  
 Subparam. = V

5 -- Parameter = V  
 Type = Branch lengths  
 Prior = Clock:Uniform  
 Tree age has an Exponential(1.000) distribution  
 Node ages are not constrained

6 -- Parameter = Clockrate  
 Type = Base rate of clock  
 Prior = Fixed(1.000000)  
 The clock rate is constant (strict clock)

Number of taxa = 39  
 Number of characters = 116

The MCMC sampler will use the following moves:

| With prob. | Chain will use move |
|------------|---------------------|
| 2.38 %     | Multiplier(Alpha)   |
| 11.90 %    | ExtSprClock(Tau,V)  |
| 23.81 %    | NNIClock(Tau,V)     |
| 11.90 %    | ParsSPRClock(Tau,V) |
| 47.62 %    | NodesliderClock(V)  |
| 2.38 %     | TreeStretch(V)      |

Division 1 has 78 unique site patterns  
 Initializing conditional likelihoods  
 Using standard non-SSE likelihood calculator for division 1 (single-precision)

Initial log likelihoods and log prior probs:

|         |    |             |    |            |
|---------|----|-------------|----|------------|
| Chain 1 | -- | -940.276105 | -- | -25.105876 |
| Chain 2 | -- | -937.127525 | -- | -30.598855 |
| Chain 3 | -- | -953.540022 | -- | -35.491175 |
| Chain 4 | -- | -935.883526 | -- | -31.235408 |

Starting stepping-stone sampling to estimate marginal likelihood.  
 50 steps will be used with 1500 generations (3 samples) within each step.  
 Total of 76500 generations (153 samples) will be collected while first  
 1500 generations (3 samples) will be discarded as initial burnin.  
 Additionally at the begining of each step 0 generations (0 samples)  
 will be discarded as burnin.  
 Sampling from posterior to prior, i.e. first step samples from close to  
 posterior.

NOTE: Number of generation of each step is reduced to the closest multiple  
 of sampling frequency. That is why, in total it will be taken 76500 gene-  
 rations instead of requested 100000.

Chain results (76500 generations requested):

0 -- [-940.276] (-937.128) (-953.540) (-935.884)

Sampling step 1 out of 50 steps...

Sampling step 2 out of 50 steps...

Sampling step 3 out of 50 steps...

Sampling step 4 out of 50 steps...

Sampling step 5 out of 50 steps...

Sampling step 6 out of 50 steps...

10000 -- (-983.462) (-954.663) [-960.939] (-953.831) -- 0:00:33

Sampling step 7 out of 50 steps...

Sampling step 8 out of 50 steps...

Sampling step 9 out of 50 steps...

Sampling step 10 out of 50 steps...

Sampling step 11 out of 50 steps...

Sampling step 12 out of 50 steps...

Sampling step 13 out of 50 steps...

20000 -- (-992.849) [-982.415] (-1116.329) (-1053.194) -- 0:00:31

Sampling step 14 out of 50 steps...

Sampling step 15 out of 50 steps...

Sampling step 16 out of 50 steps...

Sampling step 17 out of 50 steps...

Sampling step 18 out of 50 steps...

Sampling step 19 out of 50 steps...

30000 -- (-1116.901) (-1228.345) (-1069.047) [-1082.594] -- 0:00:24

Sampling step 20 out of 50 steps...

Sampling step 21 out of 50 steps...

Sampling step 22 out of 50 steps...

Sampling step 23 out of 50 steps...

Sampling step 24 out of 50 steps...

Sampling step 25 out of 50 steps...

Sampling step 26 out of 50 steps...

40000 -- (-1183.647) (-1240.637) (-1265.053) [-1159.604] -- 0:00:19

Sampling step 27 out of 50 steps...



Sampling step 28 out of 50 steps...  
Sampling step 29 out of 50 steps...  
Sampling step 30 out of 50 steps...  
Sampling step 31 out of 50 steps...  
Sampling step 32 out of 50 steps...  
Sampling step 33 out of 50 steps...  
50000 -- (-1257.997) (-1328.011) (-1322.755) [-1307.306] -- 0:00:14  
Sampling step 34 out of 50 steps...  
Sampling step 35 out of 50 steps...  
Sampling step 36 out of 50 steps...  
Sampling step 37 out of 50 steps...  
Sampling step 38 out of 50 steps...  
Sampling step 39 out of 50 steps...  
60000 -- (-1312.262) (-1318.707) (-1303.586) [-1328.344] -- 0:00:09  
Sampling step 40 out of 50 steps...  
Sampling step 41 out of 50 steps...  
Sampling step 42 out of 50 steps...  
Sampling step 43 out of 50 steps...  
Sampling step 44 out of 50 steps...  
Sampling step 45 out of 50 steps...  
Sampling step 46 out of 50 steps...  
70000 -- (-2065.694) (-2060.396) (-2043.780) [-1442.593] -- 0:00:03  
Sampling step 47 out of 50 steps...  
Sampling step 48 out of 50 steps...  
Sampling step 49 out of 50 steps...  
Sampling step 50 out of 50 steps...

Analysis completed in 41 seconds  
Analysis used 40.26 seconds of CPU time  
Log likelihood of best state for "cold" chain was -926.40

Marginal likelihood (in natural log units) estimated using stepping-stone sampling based on 50 steps with 1500 generations (3 samples) within each step.

| Run | Marginal likelihood (ln) |
|-----|--------------------------|
| 1   | -1044.58                 |



MrBayes v3.2.1 x64

(Bayesian Analysis of Phylogeny)

Distributed under the GNU General Public License

Type "help" or "help <command>" for information  
on the commands that are available.

Type "about" for authorship and general  
information about the program.

MrBayes > exe /Users/msicoli/Yeniseian-NaDene-Typological\_noHAX.nex

Executing file "/Users/msicoli/Yeniseian-NaDene-Typological\_noHAX.nex"

UNIX line termination

Longest line length = 123

Parsing file

Expecting NEXUS formatted file

Reading data block

Allocated taxon set

Allocated matrix

Defining new matrix with 39 taxa and 116 characters

Data is Standard

Missing data coded as ?

Gaps coded as -

Data matrix is not interleaved

Taxon 1 -> gwi

Taxon 2 -> dgr

Taxon 3 -> scsh

Taxon 4 -> xsl

Taxon 5 -> bea

Taxon 6 -> crx

Taxon 7 -> chp

Taxon 8 -> txc

Taxon 9 -> haa

Taxon 10 -> ing

Taxon 11 -> kuu

Taxon 12 -> hoi

Taxon 13 -> koy

Taxon 14 -> taa

Taxon 15 -> dht

Taxon 16 -> tfn

Taxon 17 -> kkz

Taxon 18 -> tcb

Taxon 19 -> tau

Taxon 20 -> ttmN

Taxon 21 -> tceS

Taxon 22 -> eya

Taxon 23 -> tli

Taxon 24 -> gce

Taxon 25 -> tol

Taxon 26 -> cco

Taxon 27 -> hup

Taxon 28 -> mtl

Taxon 29 -> wlk

```
Taxon 30 -> kto
Taxon 31 -> apc
Taxon 32 -> apw
Taxon 33 -> apj
Taxon 34 -> nav
Taxon 35 -> apk
Taxon 36 -> apl
Taxon 37 -> srs
Taxon 38 -> ket
Taxon 39 -> zko
Successfully read matrix
Setting default partition (does not divide up characters)
Setting model defaults
Seed (for generating default start values) = 1387987200
Adding dummy characters (unobserved site patterns) for division 1
WARNING: There are 32 characters incompatible with the specified
        coding bias. These characters will be excluded.
Setting output file names to "/Users/msicoli/Yeniseian-NaDene-Typological_noHAX.nex.run<i>.<p>
t>"
Exiting data block
Reached end of file
```

```
MrBayes > lset nst=6 rates=gamma
```

```
Setting Rates to Gamma
Successfully set likelihood model parameters
Adding dummy characters (unobserved site patterns) for division 1
WARNING: There are 32 characters incompatible with the specified
        coding bias. These characters will be excluded.
```

```
MrBayes > prset brlenspr=clock:uniform
```

```
Setting Brlenspr to Clock:Uniform
Successfully set prior model parameters
Adding dummy characters (unobserved site patterns) for division 1
WARNING: There are 32 characters incompatible with the specified
        coding bias. These characters will be excluded.
```

```
MrBayes > mcmc ngen=2000000 printfreq=10000 samplefreq=500 nruns=1 nchains=4 savebrlens=yes
filename=DY-25Dec-strictNOHAX
```

```
Setting number of generations to 2000000
Setting print frequency to 10000
Setting sample frequency to 500
Setting number of runs to 1
Setting number of chains to 4
Setting chain output file names to "DY-25Dec-strictNOHAX.<p/>t>"
Successfully set chain parameters
```

```
MrBayes > mcmc
```

```
Running Markov chain
MCMC stamp = 9243191534
Seed = 1101468095
Swapseed = 1387987200
Model settings:
```

```
Data not partitioned --
Datatype = Standard
```

Coding = Variable  
 # States = Variable, up to 10  
           State frequencies are fixed to be equal  
 Rates = Gamma  
           Gamma shape parameter is uniformly distributed on the interval (0.00,200.00).  
           Gamma distribution is approximated using 4 categories.  
           Likelihood summarized over all rate categories in each generation.

Active parameters:

```

Parameters
-----
Statefreq      1
Shape          2
Ratemultiplier 3
Topology       4
Brlens        5
Clockrate      6
-----
  
```

```

1 -- Parameter = Alpha_symdir
   Type       = Symmetric dirichlet/beta distribution alpha_i parameter
   Prior      = Symmetric dirichlet with fixed(-1.00) variance parameter

2 -- Parameter = Alpha
   Type       = Shape of scaled gamma distribution of site rates
   Prior      = Uniform(0.00,200.00)

3 -- Parameter = Ratemultiplier
   Type       = Partition-specific rate multiplier
   Prior      = Fixed(1.0)

4 -- Parameter = Tau
   Type       = Topology
   Prior      = All topologies equally probable a priori
   Subparam. = V

5 -- Parameter = V
   Type       = Branch lengths
   Prior      = Clock:Uniform
               Tree age has an Exponential(1.000) distribution
               Node ages are not constrained

6 -- Parameter = Clockrate
   Type       = Base rate of clock
   Prior      = Fixed(1.000000)
               The clock rate is constant (strict clock)
  
```

Number of taxa = 39  
 Number of characters = 116

The MCMC sampler will use the following moves:

```

With prob. Chain will use move
  2.38 % Multiplier(Alpha)
 11.90 % ExtSprClock(Tau,V)
 23.81 % NNIClock(Tau,V)
 11.90 % ParsSPRClock(Tau,V)
  
```

47.62 % NodesliderClock(V)  
2.38 % TreeStretch(V)

Division 1 has 78 unique site patterns  
Initializing conditional likelihoods  
Using standard non-SSE likelihood calculator for division 1 (single-precision)

Initial log likelihoods and log prior probs:

Chain 1 -- -1491.863997 -- -90.228070  
Chain 2 -- -1591.318217 -- -90.228070  
Chain 3 -- -1549.036671 -- -90.228070  
Chain 4 -- -1553.401708 -- -90.228070

Chain results (2000000 generations requested):

0 -- [-1491.864] (-1591.318) (-1549.037) (-1553.402)  
10000 -- [-937.355] (-942.024) (-963.513) (-947.137) -- 0:16:35  
20000 -- [-931.394] (-947.608) (-935.664) (-968.341) -- 0:16:30  
30000 -- (-937.840) [-945.915] (-946.888) (-952.444) -- 0:16:25  
40000 -- [-941.067] (-956.564) (-946.847) (-953.556) -- 0:16:20  
50000 -- (-954.203) (-947.643) (-944.162) [-952.468] -- 0:16:53  
60000 -- (-932.417) (-956.754) (-958.387) [-929.299] -- 0:16:42  
70000 -- (-949.555) (-958.891) (-950.307) [-941.312] -- 0:17:00  
80000 -- (-948.222) (-951.925) (-948.616) [-941.422] -- 0:16:47  
90000 -- [-950.302] (-947.418) (-942.583) (-964.886) -- 0:16:37  
100000 -- [-936.393] (-949.996) (-961.094) (-938.256) -- 0:16:27  
110000 -- (-942.820) (-957.695) [-942.194] (-937.556) -- 0:16:36  
120000 -- [-957.475] (-936.398) (-952.990) (-941.147) -- 0:16:26  
130000 -- (-966.704) (-956.605) (-961.169) [-941.583] -- 0:16:18  
140000 -- (-951.292) (-962.371) (-933.908) [-943.302] -- 0:16:09  
150000 -- [-928.330] (-952.126) (-961.511) (-936.169) -- 0:16:01  
160000 -- [-939.073] (-949.622) (-959.640) (-971.102) -- 0:15:54  
170000 -- (-953.075) (-950.311) [-935.609] (-943.604) -- 0:15:47  
180000 -- [-940.858] (-945.358) (-938.486) (-976.296) -- 0:15:40  
190000 -- (-958.537) (-939.033) [-947.339] (-958.251) -- 0:15:33  
200000 -- (-939.163) (-981.545) (-949.729) [-935.578] -- 0:15:27  
210000 -- [-938.314] (-944.417) (-953.403) (-953.384) -- 0:15:20  
220000 -- [-953.410] (-951.328) (-950.109) (-947.759) -- 0:15:14  
230000 -- [-943.901] (-931.957) (-962.056) (-967.190) -- 0:15:08  
240000 -- (-953.986) (-947.102) (-980.836) [-944.537] -- 0:15:02  
250000 -- (-949.951) (-950.770) (-942.813) [-934.273] -- 0:14:56  
260000 -- (-934.000) (-960.175) (-949.966) [-937.244] -- 0:14:50  
270000 -- (-938.609) (-956.120) (-949.767) [-946.458] -- 0:14:44  
280000 -- (-944.272) [-943.586] (-968.907) (-937.138) -- 0:14:38  
290000 -- (-955.054) (-951.905) (-949.548) [-934.545] -- 0:14:32  
300000 -- (-966.969) (-948.120) (-962.669) [-934.747] -- 0:14:27  
310000 -- (-967.104) (-958.022) [-954.944] (-959.656) -- 0:14:21  
320000 -- (-948.597) (-935.504) (-943.957) [-923.184] -- 0:14:21  
330000 -- [-969.896] (-938.042) (-948.680) (-943.430) -- 0:14:15  
340000 -- (-943.719) (-961.604) (-944.355) [-949.185] -- 0:14:09  
350000 -- (-951.234) (-953.650) (-943.576) [-946.564] -- 0:14:13  
360000 -- (-956.263) (-963.897) [-933.043] (-938.962) -- 0:14:11  
370000 -- (-937.073) (-951.267) [-937.434] (-956.318) -- 0:14:05  
380000 -- (-959.523) (-967.166) [-945.313] (-954.123) -- 0:13:59  
390000 -- (-954.761) (-945.539) [-946.972] (-955.073) -- 0:13:53  
400000 -- (-952.331) [-933.233] (-949.177) (-958.077) -- 0:13:47  
410000 -- (-949.442) [-931.422] (-953.286) (-943.410) -- 0:13:42  
420000 -- (-946.281) (-942.367) (-959.965) [-938.005] -- 0:13:40

430000 -- (-948.190) (-931.362) (-951.487) [-942.069] -- 0:13:34  
440000 -- (-956.410) (-949.344) (-955.221) [-945.501] -- 0:13:28  
450000 -- (-949.060) (-963.003) (-944.955) [-940.969] -- 0:13:22  
460000 -- (-953.972) (-944.687) (-943.767) [-958.391] -- 0:13:16  
470000 -- (-965.498) (-955.830) [-933.433] (-950.290) -- 0:13:11  
480000 -- (-950.727) (-959.634) (-952.038) [-946.686] -- 0:13:05  
490000 -- [-952.605] (-980.507) (-945.860) (-946.559) -- 0:12:59  
500000 -- (-941.620) (-946.275) (-952.934) [-945.884] -- 0:12:54  
510000 -- (-960.510) (-956.775) [-951.614] (-959.034) -- 0:12:45  
520000 -- (-953.020) (-966.495) (-968.744) [-943.081] -- 0:12:39  
530000 -- (-961.576) [-942.323] (-968.338) (-964.420) -- 0:12:34  
540000 -- [-945.171] (-953.074) (-969.792) (-950.026) -- 0:12:28  
550000 -- (-967.644) [-942.136] (-951.312) (-950.994) -- 0:12:23  
560000 -- [-935.048] (-936.408) (-956.076) (-942.144) -- 0:12:18  
570000 -- (-965.434) [-935.725] (-956.447) (-956.846) -- 0:12:12  
580000 -- (-951.101) [-936.082] (-944.782) (-957.836) -- 0:12:07  
590000 -- (-943.283) (-947.447) [-945.814] (-949.558) -- 0:12:01  
600000 -- (-965.503) (-950.470) [-932.551] (-953.454) -- 0:11:56  
610000 -- (-961.870) (-953.709) (-964.860) [-953.055] -- 0:11:50  
620000 -- (-946.166) (-940.598) (-956.277) [-940.207] -- 0:11:43  
630000 -- (-967.548) [-939.136] (-938.238) (-937.428) -- 0:11:38  
640000 -- (-947.072) (-953.853) [-945.162] (-961.193) -- 0:11:32  
650000 -- [-947.103] (-945.870) (-942.390) (-967.242) -- 0:11:27  
660000 -- (-952.460) (-947.100) [-934.427] (-947.625) -- 0:11:22  
670000 -- (-974.147) [-948.559] (-952.161) (-953.197) -- 0:11:16  
680000 -- (-951.343) (-961.887) [-937.799] (-952.649) -- 0:11:11  
690000 -- (-959.785) [-940.668] (-961.349) (-933.157) -- 0:11:04  
700000 -- [-951.860] (-944.644) (-936.300) (-940.611) -- 0:10:59  
710000 -- [-933.585] (-943.479) (-940.807) (-971.696) -- 0:10:54  
720000 -- (-944.020) [-932.168] (-950.626) (-963.962) -- 0:10:48  
730000 -- (-979.578) [-935.104] (-946.969) (-976.455) -- 0:10:43  
740000 -- (-943.342) [-947.840] (-956.041) (-957.019) -- 0:10:38  
750000 -- (-955.619) (-956.604) [-938.917] (-950.457) -- 0:10:33  
760000 -- (-933.708) (-945.322) (-960.303) [-934.581] -- 0:10:28  
770000 -- (-953.175) (-952.847) (-942.552) [-960.200] -- 0:10:21  
780000 -- (-947.945) [-952.417] (-941.755) (-944.997) -- 0:10:16  
790000 -- (-953.298) (-951.212) [-949.528] (-949.182) -- 0:10:11  
800000 -- (-964.228) (-937.635) (-970.198) [-946.546] -- 0:10:06  
810000 -- [-952.428] (-957.455) (-955.931) (-938.665) -- 0:10:00  
820000 -- (-959.384) [-931.940] (-952.530) (-939.868) -- 0:09:55  
830000 -- (-950.404) (-943.402) [-940.504] (-936.578) -- 0:09:50  
840000 -- (-948.214) (-951.265) [-948.531] (-939.789) -- 0:09:45  
850000 -- [-936.333] (-940.802) (-963.623) (-956.137) -- 0:09:39  
860000 -- [-943.295] (-949.373) (-931.339) (-944.642) -- 0:09:33  
870000 -- [-944.600] (-971.124) (-956.322) (-941.198) -- 0:09:28  
880000 -- (-952.086) (-958.467) [-944.276] (-944.528) -- 0:09:23  
890000 -- (-935.019) (-963.331) (-954.709) [-934.909] -- 0:09:18  
900000 -- [-955.367] (-961.971) (-940.293) (-946.221) -- 0:09:13  
910000 -- [-944.956] (-952.784) (-948.711) (-946.135) -- 0:09:08  
920000 -- [-941.351] (-958.436) (-941.965) (-965.884) -- 0:09:03  
930000 -- [-943.045] (-949.997) (-957.026) (-966.243) -- 0:08:57  
940000 -- [-947.958] (-952.685) (-948.906) (-966.185) -- 0:08:52  
950000 -- [-943.547] (-944.791) (-953.795) (-958.219) -- 0:08:47  
960000 -- [-948.664] (-937.475) (-953.963) (-951.974) -- 0:08:42  
970000 -- (-945.228) (-943.000) [-940.391] (-958.682) -- 0:08:37  
980000 -- (-942.721) [-955.005] (-943.118) (-948.029) -- 0:08:32  
990000 -- (-949.308) (-958.432) [-944.956] (-947.329) -- 0:08:27  
1000000 -- (-963.763) [-942.600] (-939.282) (-941.277) -- 0:08:21  
1010000 -- [-956.026] (-952.028) (-958.046) (-951.130) -- 0:08:16

1020000 -- (-946.793) (-941.185) [-944.532] (-941.661) -- 0:08:11  
1030000 -- (-952.455) (-954.924) [-950.183] (-960.060) -- 0:08:05  
1040000 -- (-941.923) [-929.049] (-953.460) (-951.416) -- 0:08:00  
1050000 -- (-938.974) (-952.326) [-944.670] (-948.231) -- 0:07:56  
1060000 -- [-956.726] (-965.371) (-946.292) (-952.556) -- 0:07:52  
1070000 -- (-951.692) [-942.686] (-960.545) (-945.504) -- 0:07:47  
1080000 -- (-943.267) (-952.522) [-946.081] (-937.700) -- 0:07:42  
1090000 -- [-938.702] (-949.284) (-961.352) (-956.833) -- 0:07:37  
1100000 -- (-948.645) (-945.578) (-943.055) [-935.429] -- 0:07:32  
1110000 -- [-931.289] (-951.192) (-965.766) (-940.369) -- 0:07:27  
1120000 -- [-948.976] (-952.158) (-955.938) (-943.702) -- 0:07:22  
1130000 -- [-938.595] (-941.782) (-953.220) (-947.949) -- 0:07:17  
1140000 -- (-949.733) [-949.839] (-958.227) (-955.826) -- 0:07:12  
1150000 -- (-947.964) [-948.141] (-941.553) (-961.317) -- 0:07:07  
1160000 -- (-938.667) (-964.196) (-969.126) [-942.027] -- 0:07:02  
1170000 -- (-951.838) (-947.635) (-943.859) [-934.886] -- 0:06:57  
1180000 -- (-958.206) [-955.667] (-944.763) (-975.749) -- 0:06:52  
1190000 -- [-943.004] (-940.644) (-957.882) (-938.882) -- 0:06:46  
1200000 -- [-942.800] (-961.546) (-931.666) (-947.273) -- 0:06:41  
1210000 -- [-945.910] (-949.287) (-955.417) (-953.544) -- 0:06:36  
1220000 -- (-937.509) [-929.336] (-953.669) (-962.570) -- 0:06:31  
1230000 -- (-941.420) (-947.795) (-971.376) [-936.714] -- 0:06:26  
1240000 -- (-947.906) [-938.212] (-945.288) (-955.439) -- 0:06:21  
1250000 -- (-958.908) (-966.160) (-964.825) [-947.414] -- 0:06:16  
1260000 -- (-932.794) [-939.340] (-978.736) (-941.724) -- 0:06:11  
1270000 -- [-954.204] (-957.737) (-954.729) (-950.189) -- 0:06:06  
1280000 -- [-940.857] (-948.973) (-964.532) (-969.281) -- 0:06:01  
1290000 -- (-938.503) (-951.940) [-932.657] (-945.145) -- 0:05:56  
1300000 -- [-934.086] (-946.934) (-967.909) (-950.704) -- 0:05:51  
1310000 -- (-942.838) [-932.611] (-951.848) (-970.486) -- 0:05:46  
1320000 -- [-942.097] (-944.045) (-943.316) (-954.315) -- 0:05:41  
1330000 -- (-946.721) (-947.238) [-938.817] (-950.817) -- 0:05:36  
1340000 -- (-956.542) (-937.005) (-937.420) [-938.133] -- 0:05:30  
1350000 -- (-937.701) [-952.295] (-951.341) (-947.539) -- 0:05:25  
1360000 -- (-949.538) (-946.034) [-940.022] (-939.297) -- 0:05:20  
1370000 -- (-946.998) (-956.339) (-953.340) [-952.229] -- 0:05:15  
1380000 -- (-950.207) (-944.814) (-947.502) [-936.955] -- 0:05:10  
1390000 -- (-948.517) (-955.098) [-936.029] (-957.723) -- 0:05:05  
1400000 -- [-938.637] (-949.683) (-935.370) (-966.963) -- 0:05:00  
1410000 -- [-937.853] (-950.536) (-946.847) (-962.059) -- 0:04:55  
1420000 -- (-959.374) (-942.046) (-957.943) [-945.828] -- 0:04:50  
1430000 -- [-930.024] (-937.028) (-965.919) (-962.063) -- 0:04:45  
1440000 -- (-945.985) (-944.604) (-969.445) [-946.893] -- 0:04:40  
1450000 -- [-950.006] (-952.739) (-951.027) (-941.568) -- 0:04:35  
1460000 -- (-932.211) (-949.716) (-941.173) [-944.489] -- 0:04:30  
1470000 -- (-950.342) [-941.645] (-951.928) (-957.010) -- 0:04:25  
1480000 -- (-951.031) (-968.137) (-950.399) [-938.305] -- 0:04:20  
1490000 -- (-951.054) (-966.496) (-957.142) [-952.299] -- 0:04:15  
1500000 -- (-955.589) [-958.318] (-946.912) (-948.679) -- 0:04:10  
1510000 -- (-948.730) (-944.100) [-951.469] (-954.367) -- 0:04:05  
1520000 -- (-977.313) (-942.205) (-967.360) [-930.039] -- 0:03:59  
1530000 -- (-939.329) (-961.150) [-936.775] (-950.428) -- 0:03:54  
1540000 -- (-945.835) (-955.589) [-943.800] (-940.947) -- 0:03:49  
1550000 -- (-957.611) (-971.595) [-945.675] (-952.787) -- 0:03:44  
1560000 -- (-951.647) [-934.829] (-959.374) (-953.416) -- 0:03:39  
1570000 -- (-965.877) (-946.653) (-956.057) [-937.952] -- 0:03:34  
1580000 -- (-954.157) (-950.216) (-940.594) [-931.524] -- 0:03:29  
1590000 -- [-931.065] (-939.935) (-970.260) (-950.905) -- 0:03:24  
1600000 -- (-959.996) (-949.427) (-937.061) [-938.640] -- 0:03:19



```

1610000 -- (-962.705) (-952.874) [-949.204] (-959.354) -- 0:03:15
1620000 -- [-929.687] (-947.367) (-950.111) (-940.536) -- 0:03:10
1630000 -- (-948.250) [-939.399] (-934.502) (-953.434) -- 0:03:05
1640000 -- (-962.785) (-941.939) (-946.483) [-936.005] -- 0:03:00
1650000 -- (-955.376) [-937.256] (-966.304) (-954.228) -- 0:02:55
1660000 -- (-954.255) (-959.875) [-950.611] (-937.879) -- 0:02:49
1670000 -- (-951.161) (-968.658) [-946.802] (-943.666) -- 0:02:44
1680000 -- (-939.441) (-947.441) (-955.454) [-947.561] -- 0:02:39
1690000 -- (-965.142) [-943.410] (-936.175) (-948.568) -- 0:02:34
1700000 -- (-947.082) [-935.016] (-938.505) (-940.893) -- 0:02:29
1710000 -- (-949.647) (-954.703) (-941.333) [-938.033] -- 0:02:24
1720000 -- (-948.931) (-953.071) (-950.412) [-938.602] -- 0:02:19
1730000 -- (-940.418) (-947.802) (-940.079) [-958.788] -- 0:02:14
1740000 -- (-943.354) (-953.244) (-972.695) [-947.118] -- 0:02:09
1750000 -- (-970.025) [-951.800] (-987.106) (-950.513) -- 0:02:04
1760000 -- (-974.234) (-940.658) (-960.836) [-942.011] -- 0:01:59
1770000 -- (-959.013) (-961.940) [-944.245] (-946.239) -- 0:01:54
1780000 -- (-951.159) (-954.037) (-953.819) [-943.614] -- 0:01:49
1790000 -- [-943.729] (-938.111) (-943.569) (-960.270) -- 0:01:44
1800000 -- (-951.347) [-945.395] (-951.588) (-958.375) -- 0:01:39
1810000 -- (-978.809) (-940.294) (-951.540) [-944.028] -- 0:01:34
1820000 -- [-949.341] (-954.698) (-963.215) (-943.387) -- 0:01:29
1830000 -- (-947.986) (-953.897) (-942.228) [-944.163] -- 0:01:24
1840000 -- (-946.008) (-964.946) (-965.080) [-945.631] -- 0:01:19
1850000 -- (-936.012) (-947.276) (-950.202) [-940.311] -- 0:01:14
1860000 -- (-962.804) [-937.911] (-942.993) (-945.219) -- 0:01:09
1870000 -- (-935.915) (-941.509) [-956.017] (-938.777) -- 0:01:04
1880000 -- [-943.399] (-947.969) (-951.893) (-954.331) -- 0:00:59
1890000 -- [-943.498] (-952.457) (-937.397) (-949.951) -- 0:00:54
1900000 -- (-952.150) (-949.121) [-936.722] (-951.804) -- 0:00:49
1910000 -- [-947.379] (-965.785) (-946.878) (-958.752) -- 0:00:44
1920000 -- (-955.702) (-968.372) [-948.499] (-952.332) -- 0:00:39
1930000 -- [-961.133] (-958.015) (-969.360) (-950.285) -- 0:00:34
1940000 -- (-939.164) [-944.908] (-959.496) (-950.614) -- 0:00:29
1950000 -- (-942.063) [-950.652] (-962.126) (-961.547) -- 0:00:24
1960000 -- [-942.198] (-954.845) (-960.291) (-945.832) -- 0:00:19
1970000 -- [-936.716] (-938.010) (-951.131) (-960.392) -- 0:00:14
1980000 -- (-949.791) [-929.682] (-940.695) (-955.712) -- 0:00:09
1990000 -- (-944.227) (-943.052) (-945.202) [-941.295] -- 0:00:04
2000000 -- (-941.922) (-945.921) (-968.723) [-937.554] -- 0:00:00

```

Continue with analysis? (yes/no): n

Analysis completed in 16 mins 36 seconds  
Analysis used 968.47 seconds of CPU time  
Log likelihood of best state for "cold" chain was -919.51

Acceptance rates for the moves in the "cold" chain:

| With prob. | (last 100) | chain accepted proposals by move |
|------------|------------|----------------------------------|
| 39.6 %     | ( 24 %)    | Multiplier(Alpha)                |
| 18.4 %     | ( 15 %)    | ExtSprClock(Tau,V)               |
| 44.3 %     | ( 41 %)    | NNIClock(Tau,V)                  |
| 15.1 %     | ( 16 %)    | ParsSPRClock(Tau,V)              |
| 70.0 %     | ( 77 %)    | NodesliderClock(V)               |
| 69.9 %     | ( 33 %)    | TreeStretch(V)                   |

Chain swap information:

1      2      3      4

```

-----
1 |          0.51   0.24   0.10
2 | 333100          0.59   0.31
3 | 332474 333374          0.62
4 | 333812 334026 333214

```

Upper diagonal: Proportion of successful state exchanges between chains  
Lower diagonal: Number of attempted state exchanges between chains

Chain information:

```

ID -- Heat
-----
1 -- 1.00 (cold chain)
2 -- 0.91
3 -- 0.83
4 -- 0.77

```

Heat = 1 / (1 + T \* (ID - 1))  
(where T = 0.10 is the temperature and ID is the chain number)

MrBayes > sumt relburnin=yes

Using relative burnin (a fraction of samples discarded).  
Summarizing trees in file "DY-25Dec-strictNOHAX.t"  
Using relative burnin ('relburnin=yes'), discarding the first 25 % of sampled trees  
Writing statistics to files DY-25Dec-strictNOHAX.<parts|tstat|vstat|trprobs|con>  
Examining file ...  
Found one tree block in file "DY-25Dec-strictNOHAX.t" with 4001 trees in last block

Tree reading status:

```

0      10      20      30      40      50      60      70      80      90      100
v-----v-----v-----v-----v-----v-----v-----v-----v-----v-----v
*****

```

Read 4001 trees from last tree block (sampling 3001 of them)

General explanation:

In an unrooted tree, a taxon bipartition (split) is specified by removing a branch, thereby dividing the species into those to the left and those to the right of the branch. Here, taxa to one side of the removed branch are denoted '.' and those to the other side are denoted '\*'. Specifically, the '.' symbol is used for the taxa on the same side as the outgroup.

In a rooted or clock tree, the tree is rooted using the model and not by reference to an outgroup. Each bipartition therefore corresponds to a clade, that is, a group that includes all the descendants of a particular branch in the tree. Taxa that are included in each clade are denoted using '\*', and taxa that are not included are denoted using the '.' symbol.

The output first includes a key to all the bipartitions with frequency larger or equal to (Minpartfreq) in at least one run. Minpartfreq is a parameter to sumt command and currently it is set to 0.10. This is followed by a table with statistics for the informative bipartitions (those including at least two taxa), sorted from highest to lowest probability. For each bipartition, the table gives the number of times the partition or split was observed in all

runs (#obs) and the posterior probability of the bipartition (Probab.), which is the same as the split frequency. If several runs are summarized, this is followed by the minimum split frequency (Min(s)), the maximum frequency (Max(s)), and the standard deviation of frequencies (Stddev(s)) across runs. The latter value should approach 0 for all bipartitions as MCMC runs converge.

This is followed by a table summarizing branch lengths, node heights (if a clock model was used) and relaxed clock parameters (if a relaxed clock model was used). The mean, variance, and 95 % credible interval are given for each of these parameters. If several runs are summarized, the potential scale reduction factor (PSRF) is also given; it should approach 1 as runs converge. Node heights will take calibration points into account, if such points were used in the analysis.

Note that Stddev may be unreliable if the partition is not present in all runs (the last column indicates the number of runs that sampled the partition if more than one run is summarized). The PSRF is not calculated at all if the partition is not present in all runs. The PSRF is also sensitive to small sample sizes and it should only be considered a rough guide to convergence since some of the assumptions allowing one to interpret it as a true potential scale reduction factor are violated in MrBayes.

List of taxa in bipartitions:

- 1 -- gwi
- 2 -- dgr
- 3 -- scsh
- 4 -- xsl
- 5 -- bea
- 6 -- crx
- 7 -- chp
- 8 -- txc
- 9 -- haa
- 10 -- ing
- 11 -- kuu
- 12 -- hoi
- 13 -- koy
- 14 -- taa
- 15 -- aht
- 16 -- tfn
- 17 -- kkz
- 18 -- tcb
- 19 -- tau
- 20 -- ttmN
- 21 -- tceS
- 22 -- eya
- 23 -- tli
- 24 -- gce
- 25 -- tol
- 26 -- cco
- 27 -- hup
- 28 -- mtl
- 29 -- wlk
- 30 -- kto
- 31 -- apc
- 32 -- apw
- 33 -- apj
- 34 -- nav
- 35 -- apk

36 -- apl  
37 -- srs  
38 -- ket  
39 -- zko

Key to taxon bipartitions (saved to file "DY-25Dec-strictNOHAX.parts"):

ID -- Partition

```
-----  
0 -- *****  
1 -- *.....  
2 -- .*.....  
3 -- ..*.....  
4 -- ...*.....  
5 -- ....*.....  
6 -- .....*.....  
7 -- .....*.....  
8 -- .....*.....  
9 -- .....*.....  
10 -- .....*.....  
11 -- .....*.....  
12 -- .....*.....  
13 -- .....*.....  
14 -- .....*.....  
15 -- .....*.....  
16 -- .....*.....  
17 -- .....*.....  
18 -- .....*.....  
19 -- .....*.....  
20 -- .....*.....  
21 -- .....*.....  
22 -- .....*.....  
23 -- .....*.....  
24 -- .....*.....  
25 -- .....*.....  
26 -- .....*.....  
27 -- .....*.....  
28 -- .....*.....  
29 -- .....*.....  
30 -- .....*.....  
31 -- .....*.....  
32 -- .....*.....  
33 -- .....*.....  
34 -- .....*.....  
35 -- .....*.....  
36 -- .....*.....  
37 -- .....*.....  
38 -- .....*.....  
39 -- .....*.....  
40 -- .....**.....  
41 -- .....**.....  
42 -- .....*****.....  
43 -- .....**.....  
44 -- .....* **.....  
45 -- .....**.....  
46 -- .....****.....  
47 -- .....* **.....  
48 -- .....****.....  
49 -- .....*****.....
```

```
50 -- *** ** .....
51 -- ..... *** .....
52 -- * * * * * .....
53 -- * ..... * .....
54 -- ..... **** ** .....
55 -- ..... ** .....
56 -- ** .....
57 -- ..... ** .....
58 -- * * * * * .....
59 -- ..... * * .....
60 -- ..... *** .....
61 -- ..... * ..... ** .....
62 -- ***** * ..... ***** .....
63 -- ..... ** .....
64 -- ***** ***** .....
65 -- ..... ** .....
66 -- ***** ***** .....
67 -- ..... * ** .....
68 -- ..... **** .....
69 -- ..... *** .....
70 -- ..... ** .....
71 -- ** .....
72 -- ..... ** .....
73 -- ** .....
74 -- ..... ** .....
75 -- * * ** * * .....
76 -- ***** .....
77 -- * ** .....
78 -- ..... * * .....
79 -- * * .....
80 -- ***** .....
81 -- ..... * ** * * .....
82 -- ..... *** ***** .....
83 -- * * * * * .....
84 -- * * ** .....
85 -- * ** .....
86 -- ***** .....
87 -- ..... ** .....
88 -- ..... * ***** .....
89 -- ..... * .....
90 -- ..... * * .....
91 -- ..... *** .....
92 -- ..... * ..... * .....
93 -- ..... * * ..... * ** .....
94 -- ..... * ..... * .....
95 -- *** * .....
96 -- ***** * * ***** .....
97 -- ..... ** **** ** .....
98 -- ***** ** * * ***** .....
99 -- *** .....
100 -- ..... * * .....
101 -- ..... * * .....
102 -- ..... * * .....
103 -- ..... * ..... * .....
104 -- ..... * * ..... ** .....
105 -- ***** * ..... * ** .....
106 -- ..... ** * .....
107 -- ***** .....
108 -- ..... * ..... * .....
```

```

109 -- .....****.....*.....
110 -- .....**.....
111 -- .....*.....**.....
112 -- .....*.....**.....
113 -- *****.....*.....*****
114 -- .....*.....*.....
-----

```

Summary statistics for informative taxon bipartitions (clades)  
(saved to file "DY-25Dec-strictNOHAX.tstat"):

| ID | #obs | Probab.  |
|----|------|----------|
| 40 | 3001 | 1.000000 |
| 41 | 3001 | 1.000000 |
| 42 | 2784 | 0.927691 |
| 43 | 2711 | 0.903366 |
| 44 | 2584 | 0.861046 |
| 45 | 2541 | 0.846718 |
| 46 | 2519 | 0.839387 |
| 47 | 2342 | 0.780407 |
| 48 | 2334 | 0.777741 |
| 49 | 2173 | 0.724092 |
| 50 | 2132 | 0.710430 |
| 51 | 1993 | 0.664112 |
| 52 | 1920 | 0.639787 |
| 53 | 1840 | 0.613129 |
| 54 | 1809 | 0.602799 |
| 55 | 1804 | 0.601133 |
| 56 | 1779 | 0.592802 |
| 57 | 1639 | 0.546151 |
| 58 | 1629 | 0.542819 |
| 59 | 1627 | 0.542153 |
| 60 | 1624 | 0.541153 |
| 61 | 1554 | 0.517827 |
| 62 | 1535 | 0.511496 |
| 63 | 1422 | 0.473842 |
| 64 | 1381 | 0.460180 |
| 65 | 1338 | 0.445851 |
| 66 | 1256 | 0.418527 |
| 67 | 1249 | 0.416195 |
| 68 | 1196 | 0.398534 |
| 69 | 1187 | 0.395535 |
| 70 | 1180 | 0.393202 |
| 71 | 1134 | 0.377874 |
| 72 | 941  | 0.313562 |
| 73 | 930  | 0.309897 |
| 74 | 869  | 0.289570 |
| 75 | 845  | 0.281573 |
| 76 | 824  | 0.274575 |
| 77 | 808  | 0.269244 |
| 78 | 785  | 0.261579 |
| 79 | 736  | 0.245252 |
| 80 | 699  | 0.232922 |
| 81 | 697  | 0.232256 |
| 82 | 688  | 0.229257 |
| 83 | 660  | 0.219927 |
| 84 | 601  | 0.200267 |
| 85 | 573  | 0.190936 |

|     |     |          |
|-----|-----|----------|
| 86  | 571 | 0.190270 |
| 87  | 557 | 0.185605 |
| 88  | 556 | 0.185272 |
| 89  | 555 | 0.184938 |
| 90  | 548 | 0.182606 |
| 91  | 526 | 0.175275 |
| 92  | 524 | 0.174608 |
| 93  | 520 | 0.173276 |
| 94  | 493 | 0.164279 |
| 95  | 469 | 0.156281 |
| 96  | 431 | 0.143619 |
| 97  | 429 | 0.142952 |
| 98  | 412 | 0.137288 |
| 99  | 401 | 0.133622 |
| 100 | 397 | 0.132289 |
| 101 | 385 | 0.128291 |
| 102 | 381 | 0.126958 |
| 103 | 373 | 0.124292 |
| 104 | 372 | 0.123959 |
| 105 | 363 | 0.120960 |
| 106 | 354 | 0.117961 |
| 107 | 345 | 0.114962 |
| 108 | 345 | 0.114962 |
| 109 | 335 | 0.111629 |
| 110 | 329 | 0.109630 |
| 111 | 327 | 0.108964 |
| 112 | 318 | 0.105965 |
| 113 | 315 | 0.104965 |
| 114 | 313 | 0.104299 |

-----  
Summary statistics for branch and node parameters  
(saved to file "DY-25Dec-strictNOHAX.vstat"):

| Parameter  | Mean     | Variance | 95% HPD Interval |          | Median   |
|------------|----------|----------|------------------|----------|----------|
|            |          |          | Lower            | Upper    |          |
| length[1]  | 0.047745 | 0.000397 | 0.012193         | 0.085901 | 0.045633 |
| length[2]  | 0.049778 | 0.000533 | 0.011875         | 0.095301 | 0.046044 |
| length[3]  | 0.043071 | 0.000362 | 0.011180         | 0.081444 | 0.040694 |
| length[4]  | 0.033754 | 0.000242 | 0.007330         | 0.063727 | 0.031843 |
| length[5]  | 0.040812 | 0.000601 | 0.005040         | 0.090257 | 0.035076 |
| length[6]  | 0.032351 | 0.000250 | 0.005307         | 0.063883 | 0.030330 |
| length[7]  | 0.043983 | 0.000278 | 0.014654         | 0.076065 | 0.042258 |
| length[8]  | 0.098026 | 0.000954 | 0.034813         | 0.153322 | 0.098731 |
| length[9]  | 0.047818 | 0.000243 | 0.015838         | 0.075966 | 0.047380 |
| length[10] | 0.048222 | 0.000497 | 0.009746         | 0.090153 | 0.044319 |
| length[11] | 0.077783 | 0.000976 | 0.018206         | 0.136765 | 0.076645 |
| length[12] | 0.035971 | 0.000260 | 0.008248         | 0.066786 | 0.034006 |
| length[13] | 0.036680 | 0.000282 | 0.007374         | 0.068520 | 0.034504 |
| length[14] | 0.027762 | 0.000223 | 0.004573         | 0.058179 | 0.024764 |
| length[15] | 0.095056 | 0.000962 | 0.034479         | 0.153684 | 0.094637 |
| length[16] | 0.091624 | 0.000941 | 0.029883         | 0.145360 | 0.091530 |
| length[17] | 0.035727 | 0.000253 | 0.007822         | 0.066391 | 0.033831 |
| length[18] | 0.024754 | 0.000182 | 0.003119         | 0.051212 | 0.022009 |
| length[19] | 0.030594 | 0.000251 | 0.004945         | 0.061505 | 0.027774 |
| length[20] | 0.033979 | 0.000207 | 0.008007         | 0.061703 | 0.032561 |
| length[21] | 0.035973 | 0.000216 | 0.008395         | 0.063505 | 0.034805 |

|            |          |          |          |          |          |
|------------|----------|----------|----------|----------|----------|
| length[22] | 0.096436 | 0.001113 | 0.033295 | 0.162128 | 0.093967 |
| length[23] | 0.098471 | 0.001297 | 0.033295 | 0.174096 | 0.094757 |
| length[24] | 0.084747 | 0.001057 | 0.023190 | 0.145752 | 0.081983 |
| length[25] | 0.074344 | 0.000896 | 0.021608 | 0.135425 | 0.070490 |
| length[26] | 0.082588 | 0.001041 | 0.022756 | 0.144016 | 0.078882 |
| length[27] | 0.090931 | 0.001161 | 0.028041 | 0.155953 | 0.087646 |
| length[28] | 0.089269 | 0.001050 | 0.025352 | 0.148093 | 0.087852 |
| length[29] | 0.045199 | 0.000442 | 0.010522 | 0.086571 | 0.041672 |
| length[30] | 0.046070 | 0.000506 | 0.009128 | 0.088738 | 0.041893 |
| length[31] | 0.009049 | 0.000068 | 0.000008 | 0.025752 | 0.006545 |
| length[32] | 0.009029 | 0.000067 | 0.000008 | 0.025733 | 0.006585 |
| length[33] | 0.015090 | 0.000107 | 0.000150 | 0.033786 | 0.013283 |
| length[34] | 0.029360 | 0.000203 | 0.006176 | 0.056253 | 0.027332 |
| length[35] | 0.005409 | 0.000033 | 0.000001 | 0.016819 | 0.003675 |
| length[36] | 0.005409 | 0.000033 | 0.000001 | 0.016819 | 0.003675 |
| length[37] | 0.064516 | 0.000621 | 0.021164 | 0.115220 | 0.062793 |
| length[38] | 0.068721 | 0.000499 | 0.020120 | 0.108231 | 0.067288 |
| length[39] | 0.068721 | 0.000499 | 0.020120 | 0.108231 | 0.067288 |
| length[40] | 0.078948 | 0.000766 | 0.025699 | 0.130694 | 0.076875 |
| length[41] | 0.037808 | 0.000296 | 0.006534 | 0.069679 | 0.036135 |
| length[42] | 0.043431 | 0.000506 | 0.002170 | 0.085166 | 0.041100 |
| length[43] | 0.054738 | 0.000744 | 0.003005 | 0.103709 | 0.052842 |
| length[44] | 0.027150 | 0.000232 | 0.001245 | 0.055630 | 0.025221 |
| length[45] | 0.038945 | 0.000562 | 0.001805 | 0.084212 | 0.035141 |
| length[46] | 0.019598 | 0.000174 | 0.000277 | 0.045492 | 0.016943 |
| length[47] | 0.031059 | 0.000416 | 0.000834 | 0.070308 | 0.026727 |
| length[48] | 0.041952 | 0.000762 | 0.000041 | 0.092359 | 0.037808 |
| length[49] | 0.026481 | 0.000328 | 0.000010 | 0.060815 | 0.023169 |
| length[50] | 0.025144 | 0.000354 | 0.000000 | 0.061014 | 0.021503 |
| length[51] | 0.015595 | 0.000136 | 0.000035 | 0.037948 | 0.012802 |
| length[52] | 0.021806 | 0.000144 | 0.001635 | 0.043750 | 0.020126 |
| length[53] | 0.019903 | 0.000170 | 0.000058 | 0.044614 | 0.017497 |
| length[54] | 0.021216 | 0.000171 | 0.000307 | 0.046973 | 0.019083 |
| length[55] | 0.013071 | 0.000103 | 0.000010 | 0.032335 | 0.010608 |
| length[56] | 0.026425 | 0.000306 | 0.000077 | 0.059736 | 0.023153 |
| length[57] | 0.020015 | 0.000212 | 0.000000 | 0.048973 | 0.017161 |
| length[58] | 0.017708 | 0.000152 | 0.000028 | 0.041109 | 0.015616 |
| length[59] | 0.012539 | 0.000124 | 0.000002 | 0.033673 | 0.009609 |
| length[60] | 0.035596 | 0.000516 | 0.000057 | 0.076962 | 0.031963 |
| length[61] | 0.012066 | 0.000067 | 0.000035 | 0.026753 | 0.010349 |
| length[62] | 0.030673 | 0.000282 | 0.000082 | 0.059964 | 0.028927 |
| length[63] | 0.039302 | 0.000699 | 0.000022 | 0.088364 | 0.033813 |
| length[64] | 0.018177 | 0.000162 | 0.000007 | 0.041267 | 0.015395 |
| length[65] | 0.013279 | 0.000115 | 0.000034 | 0.032791 | 0.010841 |
| length[66] | 0.014033 | 0.000114 | 0.000000 | 0.034335 | 0.011538 |
| length[67] | 0.030355 | 0.000451 | 0.000166 | 0.074401 | 0.026654 |
| length[68] | 0.032829 | 0.000478 | 0.000401 | 0.075776 | 0.028367 |
| length[69] | 0.033600 | 0.000614 | 0.000007 | 0.082183 | 0.027659 |
| length[70] | 0.035638 | 0.000590 | 0.000344 | 0.082215 | 0.030678 |
| length[71] | 0.022881 | 0.000216 | 0.000108 | 0.048601 | 0.020829 |
| length[72] | 0.014831 | 0.000207 | 0.000005 | 0.043495 | 0.010513 |
| length[73] | 0.022379 | 0.000207 | 0.001286 | 0.051233 | 0.019563 |
| length[74] | 0.028751 | 0.000399 | 0.000023 | 0.067547 | 0.025319 |
| length[75] | 0.024530 | 0.000182 | 0.001824 | 0.048269 | 0.022277 |
| length[76] | 0.015502 | 0.000132 | 0.000192 | 0.037206 | 0.012693 |
| length[77] | 0.021196 | 0.000260 | 0.000201 | 0.052896 | 0.018138 |
| length[78] | 0.012706 | 0.000125 | 0.000014 | 0.034066 | 0.009854 |
| length[79] | 0.018969 | 0.000197 | 0.000022 | 0.044661 | 0.015658 |
| length[80] | 0.015601 | 0.000144 | 0.000013 | 0.037268 | 0.012381 |



|             |          |          |          |          |          |
|-------------|----------|----------|----------|----------|----------|
| length[81]  | 0.022881 | 0.000314 | 0.000033 | 0.057784 | 0.017572 |
| length[82]  | 0.022380 | 0.000231 | 0.000009 | 0.051348 | 0.019434 |
| length[83]  | 0.009999 | 0.000079 | 0.000014 | 0.028500 | 0.007436 |
| length[84]  | 0.021881 | 0.000214 | 0.000369 | 0.051007 | 0.018568 |
| length[85]  | 0.018607 | 0.000215 | 0.000117 | 0.045925 | 0.015094 |
| length[86]  | 0.014686 | 0.000178 | 0.000073 | 0.041646 | 0.010910 |
| length[87]  | 0.007390 | 0.000051 | 0.000002 | 0.020994 | 0.005171 |
| length[88]  | 0.026450 | 0.000269 | 0.000121 | 0.055423 | 0.023479 |
| length[89]  | 0.007985 | 0.000063 | 0.000002 | 0.025727 | 0.005415 |
| length[90]  | 0.007679 | 0.000051 | 0.000039 | 0.021924 | 0.005402 |
| length[91]  | 0.015195 | 0.000141 | 0.000039 | 0.038210 | 0.012350 |
| length[92]  | 0.008481 | 0.000065 | 0.000001 | 0.023178 | 0.006031 |
| length[93]  | 0.007473 | 0.000049 | 0.000002 | 0.020801 | 0.005320 |
| length[94]  | 0.021296 | 0.000297 | 0.000023 | 0.054232 | 0.016988 |
| length[95]  | 0.019179 | 0.000207 | 0.000051 | 0.049124 | 0.015973 |
| length[96]  | 0.017382 | 0.000136 | 0.000043 | 0.039105 | 0.016118 |
| length[97]  | 0.009117 | 0.000055 | 0.000038 | 0.023782 | 0.007327 |
| length[98]  | 0.016307 | 0.000146 | 0.000053 | 0.040050 | 0.012861 |
| length[99]  | 0.012157 | 0.000124 | 0.000027 | 0.032898 | 0.008471 |
| length[100] | 0.023908 | 0.000341 | 0.000049 | 0.057715 | 0.020063 |
| length[101] | 0.008470 | 0.000092 | 0.000008 | 0.028994 | 0.005377 |
| length[102] | 0.009177 | 0.000088 | 0.000052 | 0.026222 | 0.006538 |
| length[103] | 0.018680 | 0.000164 | 0.000354 | 0.044446 | 0.015757 |
| length[104] | 0.006476 | 0.000044 | 0.000088 | 0.020659 | 0.004306 |
| length[105] | 0.032742 | 0.000323 | 0.002786 | 0.064638 | 0.030082 |
| length[106] | 0.006786 | 0.000049 | 0.000002 | 0.020563 | 0.004338 |
| length[107] | 0.010552 | 0.000062 | 0.000090 | 0.023547 | 0.009176 |
| length[108] | 0.020489 | 0.000259 | 0.000002 | 0.053071 | 0.016829 |
| length[109] | 0.032602 | 0.000422 | 0.000151 | 0.070349 | 0.029065 |
| length[110] | 0.017008 | 0.000265 | 0.000028 | 0.050733 | 0.011978 |
| length[111] | 0.017787 | 0.000238 | 0.000155 | 0.047918 | 0.014802 |
| length[112] | 0.010261 | 0.000078 | 0.000025 | 0.027335 | 0.007870 |
| length[113] | 0.016491 | 0.000145 | 0.000001 | 0.038375 | 0.014200 |
| length[114] | 0.022781 | 0.000343 | 0.000144 | 0.060629 | 0.018659 |
| height[0]   | 0.167205 | 0.001492 | 0.064714 | 0.226702 | 0.171668 |
| height[1]   | 0.000000 | 0.000000 | 0.000000 | 0.000000 | 0.000000 |
| height[2]   | 0.000000 | 0.000000 | 0.000000 | 0.000000 | 0.000000 |
| height[3]   | 0.000000 | 0.000000 | 0.000000 | 0.000000 | 0.000000 |
| height[4]   | 0.000000 | 0.000000 | 0.000000 | 0.000000 | 0.000000 |
| height[5]   | 0.000000 | 0.000000 | 0.000000 | 0.000000 | 0.000000 |
| height[6]   | 0.000000 | 0.000000 | 0.000000 | 0.000000 | 0.000000 |
| height[7]   | 0.000000 | 0.000000 | 0.000000 | 0.000000 | 0.000000 |
| height[8]   | 0.000000 | 0.000000 | 0.000000 | 0.000000 | 0.000000 |
| height[9]   | 0.000000 | 0.000000 | 0.000000 | 0.000000 | 0.000000 |
| height[10]  | 0.000000 | 0.000000 | 0.000000 | 0.000000 | 0.000000 |
| height[11]  | 0.000000 | 0.000000 | 0.000000 | 0.000000 | 0.000000 |
| height[12]  | 0.000000 | 0.000000 | 0.000000 | 0.000000 | 0.000000 |
| height[13]  | 0.000000 | 0.000000 | 0.000000 | 0.000000 | 0.000000 |
| height[14]  | 0.000000 | 0.000000 | 0.000000 | 0.000000 | 0.000000 |
| height[15]  | 0.000000 | 0.000000 | 0.000000 | 0.000000 | 0.000000 |
| height[16]  | 0.000000 | 0.000000 | 0.000000 | 0.000000 | 0.000000 |
| height[17]  | 0.000000 | 0.000000 | 0.000000 | 0.000000 | 0.000000 |
| height[18]  | 0.000000 | 0.000000 | 0.000000 | 0.000000 | 0.000000 |
| height[19]  | 0.000000 | 0.000000 | 0.000000 | 0.000000 | 0.000000 |
| height[20]  | 0.000000 | 0.000000 | 0.000000 | 0.000000 | 0.000000 |
| height[21]  | 0.000000 | 0.000000 | 0.000000 | 0.000000 | 0.000000 |
| height[22]  | 0.000000 | 0.000000 | 0.000000 | 0.000000 | 0.000000 |
| height[23]  | 0.000000 | 0.000000 | 0.000000 | 0.000000 | 0.000000 |
| height[24]  | 0.000000 | 0.000000 | 0.000000 | 0.000000 | 0.000000 |

|            |          |          |          |          |          |
|------------|----------|----------|----------|----------|----------|
| height[25] | 0.000000 | 0.000000 | 0.000000 | 0.000000 | 0.000000 |
| height[26] | 0.000000 | 0.000000 | 0.000000 | 0.000000 | 0.000000 |
| height[27] | 0.000000 | 0.000000 | 0.000000 | 0.000000 | 0.000000 |
| height[28] | 0.000000 | 0.000000 | 0.000000 | 0.000000 | 0.000000 |
| height[29] | 0.000000 | 0.000000 | 0.000000 | 0.000000 | 0.000000 |
| height[30] | 0.000000 | 0.000000 | 0.000000 | 0.000000 | 0.000000 |
| height[31] | 0.000000 | 0.000000 | 0.000000 | 0.000000 | 0.000000 |
| height[32] | 0.000000 | 0.000000 | 0.000000 | 0.000000 | 0.000000 |
| height[33] | 0.000000 | 0.000000 | 0.000000 | 0.000000 | 0.000000 |
| height[34] | 0.000000 | 0.000000 | 0.000000 | 0.000000 | 0.000000 |
| height[35] | 0.000000 | 0.000000 | 0.000000 | 0.000000 | 0.000000 |
| height[36] | 0.000000 | 0.000000 | 0.000000 | 0.000000 | 0.000000 |
| height[37] | 0.000000 | 0.000000 | 0.000000 | 0.000000 | 0.000000 |
| height[38] | 0.000000 | 0.000000 | 0.000000 | 0.000000 | 0.000000 |
| height[39] | 0.000000 | 0.000000 | 0.000000 | 0.000000 | 0.000000 |
| height[40] | 0.068721 | 0.000499 | 0.020120 | 0.108231 | 0.067288 |
| height[41] | 0.005409 | 0.000033 | 0.000001 | 0.016819 | 0.003675 |
| height[42] | 0.066068 | 0.000460 | 0.023255 | 0.107670 | 0.065163 |
| height[43] | 0.093094 | 0.000967 | 0.031159 | 0.150516 | 0.091382 |
| height[44] | 0.032751 | 0.000195 | 0.009594 | 0.061247 | 0.030640 |
| height[45] | 0.041491 | 0.000312 | 0.010309 | 0.075752 | 0.039546 |
| height[46] | 0.028614 | 0.000139 | 0.007752 | 0.051422 | 0.027382 |
| height[47] | 0.048160 | 0.000328 | 0.013861 | 0.082856 | 0.046490 |
| height[48] | 0.102051 | 0.000939 | 0.033904 | 0.156231 | 0.101894 |
| height[49] | 0.044083 | 0.000245 | 0.014362 | 0.072970 | 0.042818 |
| height[50] | 0.067635 | 0.000394 | 0.025494 | 0.101953 | 0.068815 |
| height[51] | 0.014883 | 0.000072 | 0.001696 | 0.030505 | 0.013577 |
| height[52] | 0.065575 | 0.000278 | 0.028271 | 0.095905 | 0.065644 |
| height[53] | 0.029567 | 0.000161 | 0.007006 | 0.054390 | 0.027800 |
| height[54] | 0.138499 | 0.001136 | 0.056367 | 0.196568 | 0.140161 |
| height[55] | 0.006196 | 0.000034 | 0.000008 | 0.017342 | 0.004467 |
| height[56] | 0.028441 | 0.000175 | 0.006407 | 0.054938 | 0.026317 |
| height[57] | 0.031869 | 0.000194 | 0.007556 | 0.059325 | 0.030383 |
| height[58] | 0.055037 | 0.000241 | 0.023028 | 0.084464 | 0.054538 |
| height[59] | 0.022243 | 0.000123 | 0.003119 | 0.044169 | 0.020116 |
| height[60] | 0.094014 | 0.000792 | 0.039607 | 0.145940 | 0.094147 |
| height[61] | 0.040063 | 0.000170 | 0.016169 | 0.064510 | 0.039496 |
| height[62] | 0.089967 | 0.000444 | 0.042770 | 0.130448 | 0.091306 |
| height[63] | 0.071851 | 0.000714 | 0.024197 | 0.124905 | 0.069595 |
| height[64] | 0.139751 | 0.000944 | 0.066074 | 0.195552 | 0.143003 |
| height[65] | 0.029817 | 0.000156 | 0.008111 | 0.055325 | 0.028712 |
| height[66] | 0.152294 | 0.001113 | 0.075566 | 0.212945 | 0.156844 |
| height[67] | 0.075794 | 0.000602 | 0.028172 | 0.122614 | 0.074579 |
| height[68] | 0.075022 | 0.000607 | 0.025254 | 0.118959 | 0.074053 |
| height[69] | 0.076377 | 0.000605 | 0.025417 | 0.121906 | 0.075703 |
| height[70] | 0.067284 | 0.000576 | 0.022105 | 0.111580 | 0.064454 |
| height[71] | 0.040578 | 0.000298 | 0.008586 | 0.073806 | 0.038921 |
| height[72] | 0.024041 | 0.000163 | 0.003347 | 0.049360 | 0.021855 |
| height[73] | 0.040567 | 0.000267 | 0.011390 | 0.071229 | 0.038506 |
| height[74] | 0.079740 | 0.000707 | 0.034338 | 0.136401 | 0.078959 |
| height[75] | 0.079515 | 0.000510 | 0.027455 | 0.118641 | 0.079666 |
| height[76] | 0.122705 | 0.000711 | 0.065935 | 0.168773 | 0.125567 |
| height[77] | 0.046325 | 0.000286 | 0.013999 | 0.076954 | 0.045748 |
| height[78] | 0.036370 | 0.000226 | 0.008586 | 0.063334 | 0.035161 |
| height[79] | 0.031399 | 0.000190 | 0.007349 | 0.059235 | 0.030636 |
| height[80] | 0.125868 | 0.000969 | 0.052778 | 0.173624 | 0.131379 |
| height[81] | 0.066169 | 0.000439 | 0.020229 | 0.104472 | 0.064944 |
| height[82] | 0.116137 | 0.000708 | 0.061777 | 0.168776 | 0.117383 |
| height[83] | 0.044714 | 0.000187 | 0.021529 | 0.076030 | 0.044518 |

|             |          |          |          |          |          |
|-------------|----------|----------|----------|----------|----------|
| height[84]  | 0.055646 | 0.000304 | 0.022615 | 0.088766 | 0.053772 |
| height[85]  | 0.049451 | 0.000286 | 0.014809 | 0.080123 | 0.047656 |
| height[86]  | 0.163766 | 0.001472 | 0.073452 | 0.233565 | 0.168505 |
| height[87]  | 0.008914 | 0.000047 | 0.000150 | 0.022318 | 0.007113 |
| height[88]  | 0.092677 | 0.000671 | 0.035970 | 0.140772 | 0.092801 |
| height[89]  | 0.036326 | 0.000166 | 0.014451 | 0.064632 | 0.035690 |
| height[90]  | 0.009052 | 0.000044 | 0.000299 | 0.021780 | 0.007337 |
| height[91]  | 0.045046 | 0.000258 | 0.015595 | 0.074431 | 0.044284 |
| height[92]  | 0.036242 | 0.000160 | 0.013659 | 0.059686 | 0.035125 |
| height[93]  | 0.050038 | 0.000216 | 0.019222 | 0.074613 | 0.049952 |
| height[94]  | 0.085524 | 0.000675 | 0.034813 | 0.135786 | 0.085037 |
| height[95]  | 0.056276 | 0.000366 | 0.021489 | 0.095489 | 0.055095 |
| height[96]  | 0.112398 | 0.000808 | 0.050272 | 0.164706 | 0.114740 |
| height[97]  | 0.154441 | 0.001031 | 0.078728 | 0.214931 | 0.158091 |
| height[98]  | 0.098028 | 0.000791 | 0.033909 | 0.140934 | 0.099526 |
| height[99]  | 0.054545 | 0.000306 | 0.021656 | 0.084401 | 0.053863 |
| height[100] | 0.076106 | 0.000682 | 0.030469 | 0.125618 | 0.076927 |
| height[101] | 0.026118 | 0.000144 | 0.007708 | 0.053814 | 0.024012 |
| height[102] | 0.036828 | 0.000200 | 0.008715 | 0.062788 | 0.035531 |
| height[103] | 0.027954 | 0.000160 | 0.006132 | 0.052216 | 0.026366 |
| height[104] | 0.048838 | 0.000178 | 0.018887 | 0.069881 | 0.049055 |
| height[105] | 0.081396 | 0.000339 | 0.044713 | 0.119850 | 0.081532 |
| height[106] | 0.022686 | 0.000097 | 0.006773 | 0.040808 | 0.021766 |
| height[107] | 0.137247 | 0.001148 | 0.057494 | 0.187945 | 0.143259 |
| height[108] | 0.089987 | 0.000650 | 0.039422 | 0.144913 | 0.089487 |
| height[109] | 0.087314 | 0.000569 | 0.037736 | 0.135565 | 0.088147 |
| height[110] | 0.081851 | 0.000821 | 0.031732 | 0.132058 | 0.080694 |
| height[111] | 0.098839 | 0.000638 | 0.050438 | 0.149961 | 0.099060 |
| height[112] | 0.050226 | 0.000205 | 0.024122 | 0.078019 | 0.051091 |
| height[113] | 0.134872 | 0.000845 | 0.073295 | 0.186875 | 0.140082 |
| height[114] | 0.076121 | 0.000753 | 0.025953 | 0.130851 | 0.073749 |

Clade credibility values:

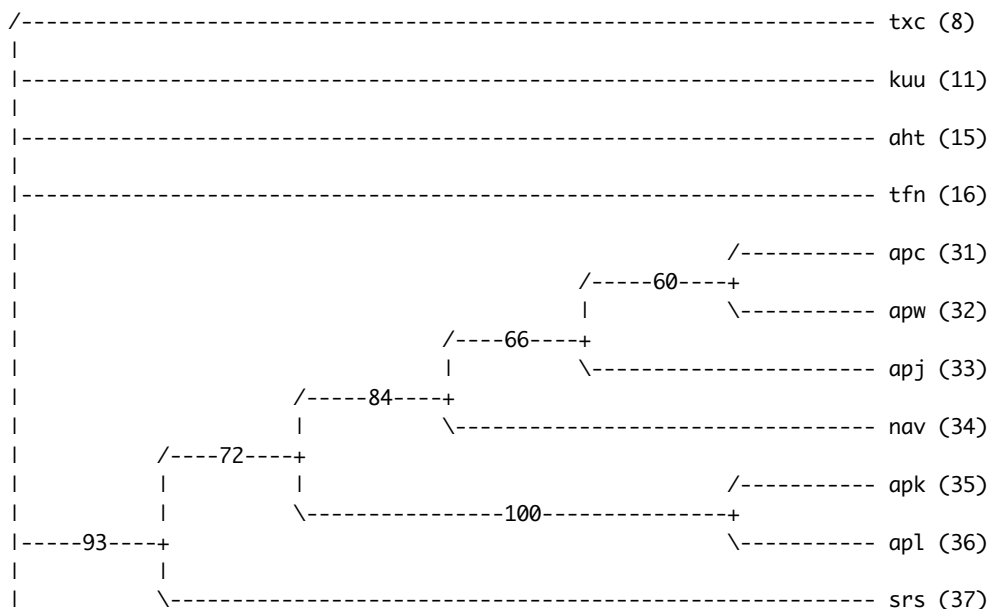

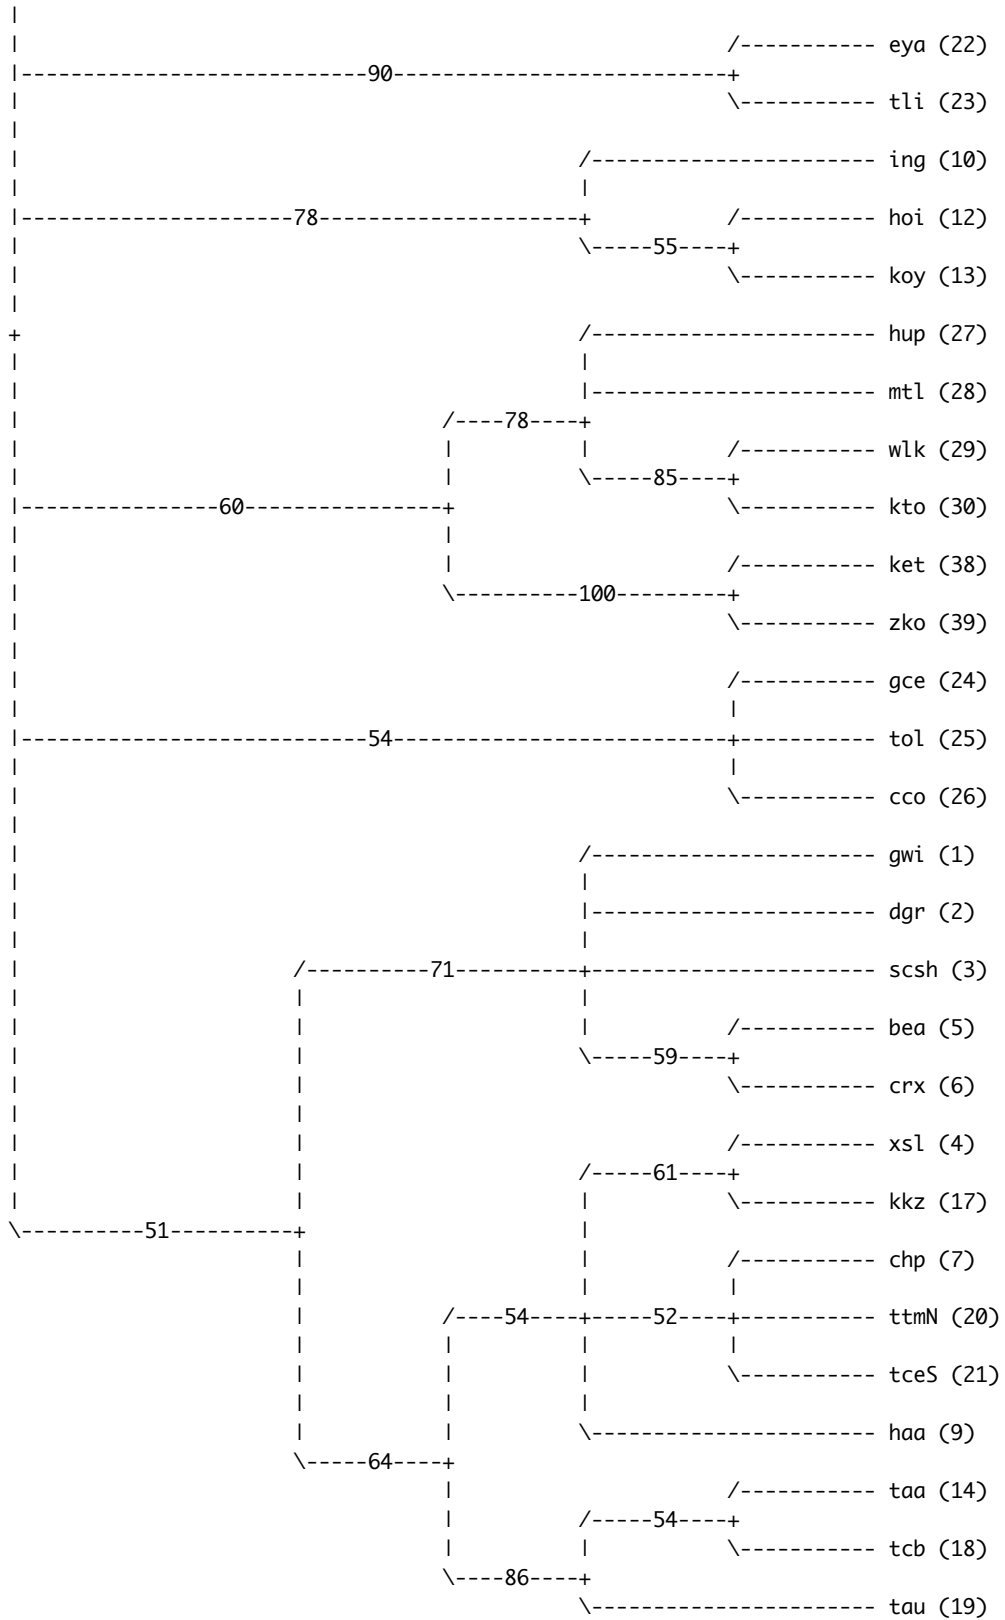

Phylogram (based on median node depths):

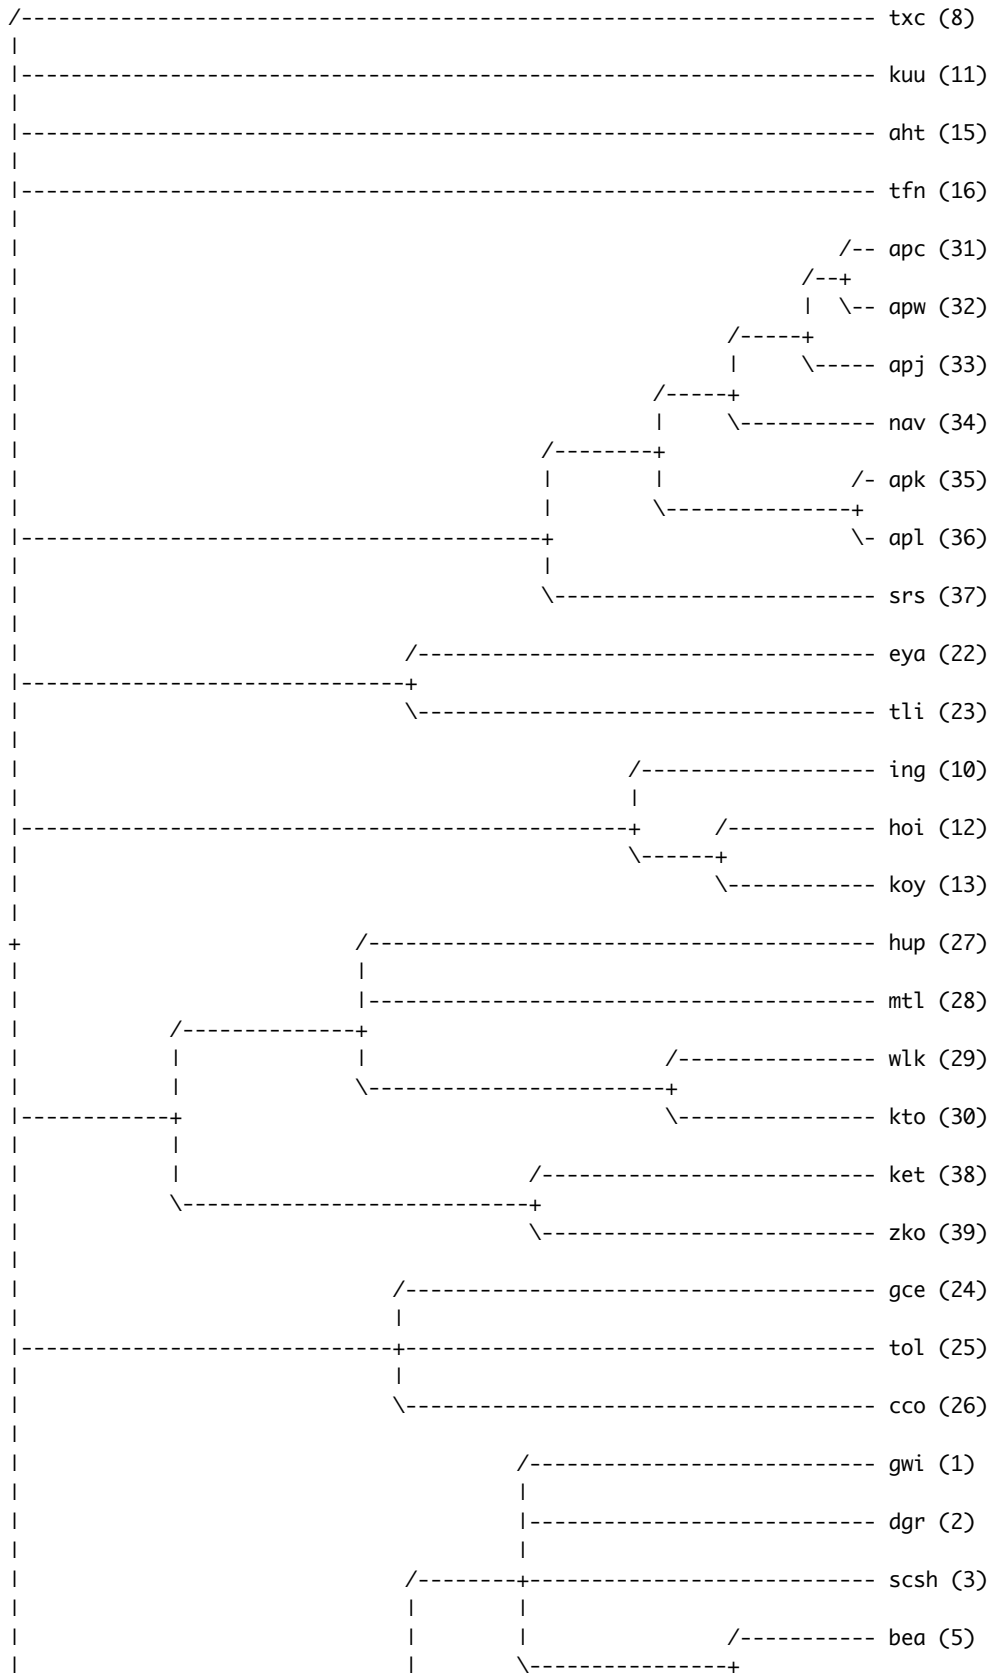

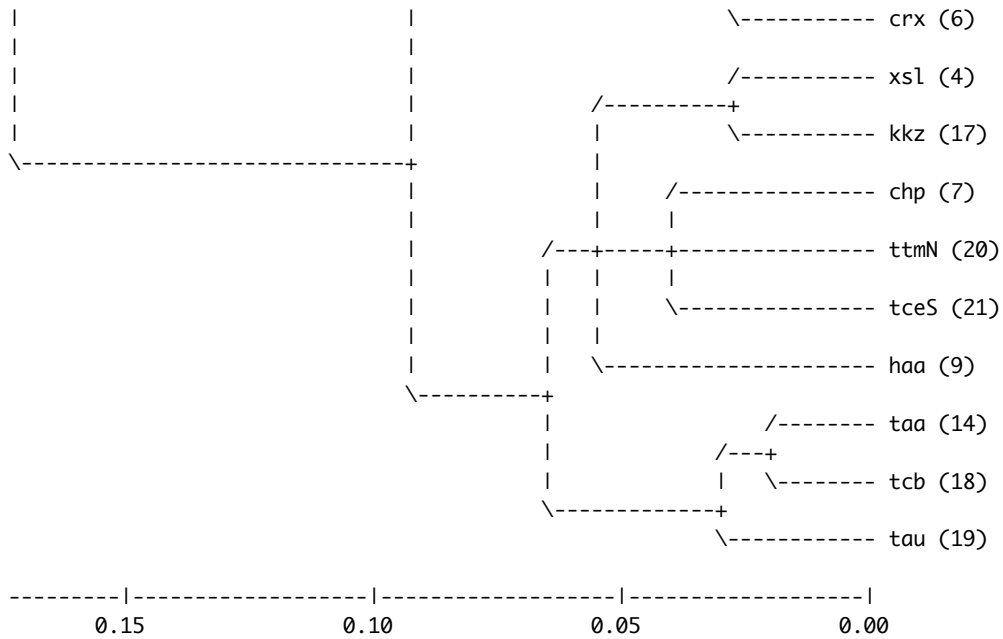

[Expected changes per site]

Calculating tree probabilities...

Credible sets of trees (3001 trees sampled):

- 50 % credible set contains 1501 trees
- 90 % credible set contains 2701 trees
- 95 % credible set contains 2851 trees
- 99 % credible set contains 2971 trees

MrBayes > sump relburnin=yes

Using relative burnin (a fraction of samples discarded).  
Summarizing parameters in file DY-25Dec-strictNOHAX.p  
Writing summary statistics to file DY-25Dec-strictNOHAX.pstat  
Using relative burnin ('relburnin=yes'), discarding the first 25 % of samples

Below is a rough plot of the generation (x-axis) versus the log probability of observing the data (y-axis). You can use this graph to determine what the burn in for your analysis should be. When the log probability starts to plateau you may be at stationarity. Sample trees and parameters after the log probability plateaus. Of course, this is not a guarantee that you are at stationarity. When the log probability starts to plateau, when possible, run multiple analyses starting from different random trees; if the inferences you make for independent analyses are the same, this is reasonable evidence that the chains have converged. You can use MrBayes to run several independent analyses simultaneously. During such a run, MrBayes will monitor the convergence of topologies. After the run has been completed, the 'sumt' and 'sump' functions will provide additional convergence diagnostics for all the parameters in your model. Remember that the burn in is the number of samples to discard. There are a total of ngen / samplefreq samples taken during a MCMC analysis.

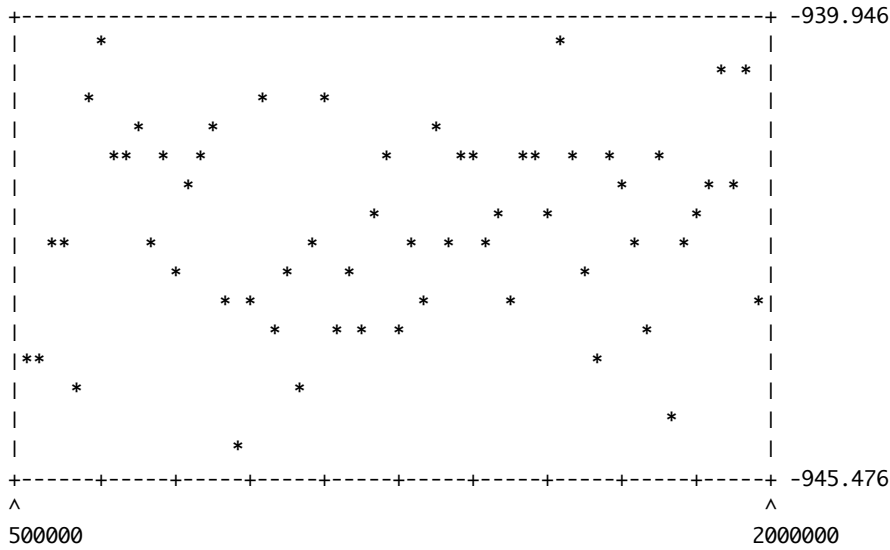

Estimated marginal likelihoods for run sampled in file "DY-25Dec-strictNOHAX.p":  
 (Use the harmonic mean for Bayes factor comparisons of models)  
 (Values are saved to the file /Users/msicoli/Yeniseian-NaDene-Typlogical\_noHAX.nex.lstat)

| Arithmetic mean | Harmonic mean |
|-----------------|---------------|
| -929.96         | -965.14       |

Model parameter summaries for run sampled in file "DY-25Dec-strictNOHAX":  
 Based on a total of 3001 samples out of a total of 4001 samples  
 from this analysis.

Parameter summaries saved to file "/Users/msicoli/Yeniseian-NaDene-Typlogical\_noHAX.nex.pstat".

| Parameter | Mean     | Variance   | 95% HPD Interval |           | Median   | ESS*    |
|-----------|----------|------------|------------------|-----------|----------|---------|
|           |          |            | Lower            | Upper     |          |         |
| TH        | 0.167205 | 0.001492   | 0.064714         | 0.226702  | 0.171668 | 319.44  |
| TL        | 2.854755 | 0.366821   | 1.394540         | 3.892517  | 2.963303 | 284.19  |
| alpha     | 9.210757 | 772.797996 | 0.087496         | 56.401044 | 1.903306 | 2500.96 |

\* Convergence diagnostic (ESS = Estimated Sample Size); ESS value below 100 may indicate that the parameter is undersampled.

MrBayes > ssp ngen=100000 diagnfreq=1000 filename=YND-Typ-NoHax-ss

Could not find parameter "ngen=100000"

MrBayes > ssp ngen=100000 diagnfreq=1000 filename=YND-Typ-NoHax-ss

Setting number of generations to 100000  
 Setting diagnosing frequency to 1000

MrBayes > ss

Setting chain output file names to "YND-Typ-NoHax-ss.<p/t>"

Running Markov chain

MCMC stamp = 7908113950

Seed = 1878978649

Swapseed = 1031120143

Model settings:

Data not partitioned --

Datatype = Standard

Coding = Variable

# States = Variable, up to 10

State frequencies are fixed to be equal

Rates = Gamma

Gamma shape parameter is uniformly distributed on the interval (0.00,200.00).

Gamma distribution is approximated using 4 categories.

Likelihood summarized over all rate categories in each generation.

Active parameters:

Parameters

-----

Statefreq 1

Shape 2

Ratemultiplier 3

Topology 4

Brlens 5

Clockrate 6

-----

1 -- Parameter = Alpha\_symdir  
Type = Symmetric dirichlet/beta distribution alpha\_i parameter  
Prior = Symmetric dirichlet with fixed(-1.00) variance parameter

2 -- Parameter = Alpha  
Type = Shape of scaled gamma distribution of site rates  
Prior = Uniform(0.00,200.00)

3 -- Parameter = Ratemultiplier  
Type = Partition-specific rate multiplier  
Prior = Fixed(1.0)

4 -- Parameter = Tau  
Type = Topology  
Prior = All topologies equally probable a priori  
Subparam. = V

5 -- Parameter = V  
Type = Branch lengths  
Prior = Clock:Uniform  
Tree age has an Exponential(1.000) distribution  
Node ages are not constrained

6 -- Parameter = Clockrate  
Type = Base rate of clock  
Prior = Fixed(1.000000)  
The clock rate is constant (strict clock)



Number of taxa = 39  
Number of characters = 116

The MCMC sampler will use the following moves:

With prob. Chain will use move  
2.38 % Multiplier(Alpha)  
11.90 % ExtSprClock(Tau,V)  
23.81 % NNIClock(Tau,V)  
11.90 % ParsSPRClock(Tau,V)  
47.62 % NodesliderClock(V)  
2.38 % TreeStretch(V)

Division 1 has 78 unique site patterns  
Initializing conditional likelihoods  
Using standard non-SSE likelihood calculator for division 1 (single-precision)

Initial log likelihoods and log prior probs:

Chain 1 -- -937.554390 -- -17.664652  
Chain 2 -- -941.921722 -- -36.467720  
Chain 3 -- -945.920556 -- -31.420523  
Chain 4 -- -968.722535 -- -27.744449

Starting stepping-stone sampling to estimate marginal likelihood.  
50 steps will be used with 1500 generations (3 samples) within each step.  
Total of 76500 generations (153 samples) will be collected while first  
1500 generations (3 samples) will be discarded as initial burnin.  
Additionally at the beginning of each step 0 generations (0 samples)  
will be discarded as burnin.

Sampling from posterior to prior, i.e. first step samples from close to  
posterior.

NOTE: Number of generation of each step is reduced to the closest multiple  
of sampling frequency. That is why, in total it will be taken 76500 gene-  
rations instead of requested 100000.

Chain results (76500 generations requested):

0 -- [-937.554] (-941.922) (-945.921) (-968.723)

Sampling step 1 out of 50 steps...

Sampling step 2 out of 50 steps...

Sampling step 3 out of 50 steps...

Sampling step 4 out of 50 steps...

Sampling step 5 out of 50 steps...

Sampling step 6 out of 50 steps...

10000 -- (-966.909) [-971.576] (-960.096) (-1012.739) -- 0:00:33

Sampling step 7 out of 50 steps...

Sampling step 8 out of 50 steps...

Sampling step 9 out of 50 steps...

Sampling step 10 out of 50 steps...

Sampling step 11 out of 50 steps...

Sampling step 12 out of 50 steps...

Sampling step 13 out of 50 steps...

20000 -- (-1040.425) (-1044.518) [-1011.347] (-1010.900) -- 0:00:28  
Sampling step 14 out of 50 steps...

Sampling step 15 out of 50 steps...

Sampling step 16 out of 50 steps...

Sampling step 17 out of 50 steps...

Sampling step 18 out of 50 steps...

Sampling step 19 out of 50 steps...

30000 -- [-1056.473] (-1214.950) (-1120.707) (-1102.046) -- 0:00:23  
Sampling step 20 out of 50 steps...

Sampling step 21 out of 50 steps...

Sampling step 22 out of 50 steps...

Sampling step 23 out of 50 steps...

Sampling step 24 out of 50 steps...

Sampling step 25 out of 50 steps...

Sampling step 26 out of 50 steps...

40000 -- (-1295.848) (-1294.247) [-1179.106] (-1254.753) -- 0:00:18  
Sampling step 27 out of 50 steps...

Sampling step 28 out of 50 steps...

Sampling step 29 out of 50 steps...

Sampling step 30 out of 50 steps...

Sampling step 31 out of 50 steps...

Sampling step 32 out of 50 steps...

Sampling step 33 out of 50 steps...

50000 -- (-1389.502) (-1378.487) (-1326.617) [-1299.880] -- 0:00:13  
Sampling step 34 out of 50 steps...

Sampling step 35 out of 50 steps...

Sampling step 36 out of 50 steps...

Sampling step 37 out of 50 steps...

Sampling step 38 out of 50 steps...

Sampling step 39 out of 50 steps...

60000 -- (-1391.943) (-1388.422) (-1364.142) [-1477.828] -- 0:00:08  
 Sampling step 40 out of 50 steps...

Sampling step 41 out of 50 steps...

Sampling step 42 out of 50 steps...

Sampling step 43 out of 50 steps...

Sampling step 44 out of 50 steps...

Sampling step 45 out of 50 steps...

Sampling step 46 out of 50 steps...

70000 -- (-1987.933) (-2082.221) (-2084.316) [-1834.352] -- 0:00:03  
 Sampling step 47 out of 50 steps...

Sampling step 48 out of 50 steps...

Sampling step 49 out of 50 steps...

Sampling step 50 out of 50 steps...

Analysis completed in 39 seconds  
 Analysis used 37.13 seconds of CPU time  
 Log likelihood of best state for "cold" chain was -929.82

Marginal likelihood (in natural log units) estimated using stepping-stone sampling based on 50 steps with 1500 generations (3 samples) within each step.

| Run | Marginal likelihood (ln) |
|-----|--------------------------|
| 1   | -1050.61                 |

More statistics on stepping-stone sampling is dumped to YND-Typ-NoHax-ss.ss file.

Plot of average standard deviation of split frequencies across steps.  
 Points at -1.0 (y-axis) indicate that there were no splits above minimum frequency for corresponding step.

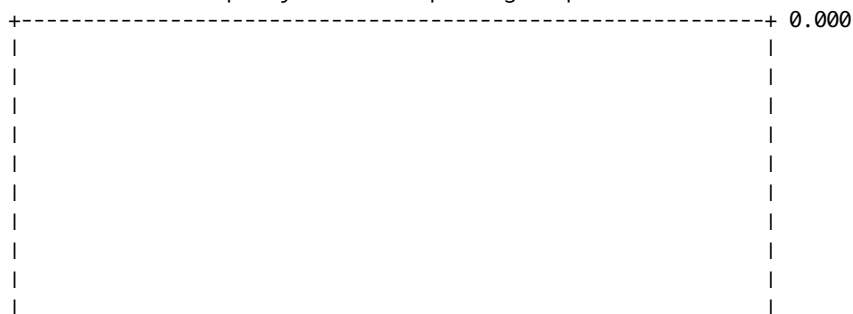

```

|
|
|
|
|***** **** ***** **** ***** **** ***** **** ***** **** *****|
+-----+-----+-----+-----+-----+-----+-----+-----+-----+ 0.000
^
1
50

```

Acceptance rates for the moves in the "cold" chain:

|            |            |                                  |
|------------|------------|----------------------------------|
| With prob. | (last 100) | chain accepted proposals by move |
| 44.6 %     | ( 36 %)    | Multiplier(Alpha)                |
| 43.5 %     | ( 63 %)    | ExtSprClock(Tau,V)               |
| 78.2 %     | (100 %)    | NNIClock(Tau,V)                  |
| 33.3 %     | ( 35 %)    | ParsSPRClock(Tau,V)              |
| 85.7 %     | ( 99 %)    | NodesliderClock(V)               |
| 52.1 %     | ( 80 %)    | TreeStretch(V)                   |

Chain swap information:

|   | 1     | 2     | 3     | 4    |
|---|-------|-------|-------|------|
| 1 |       | 0.25  | 0.07  | 0.02 |
| 2 | 12661 |       | 0.32  | 0.10 |
| 3 | 12779 | 12794 |       | 0.40 |
| 4 | 12805 | 12805 | 12656 |      |

Upper diagonal: Proportion of successful state exchanges between chains

Lower diagonal: Number of attempted state exchanges between chains

Chain information:

```

ID -- Heat
-----
1 -- 1.00 (cold chain)
2 -- 0.91
3 -- 0.83
4 -- 0.77

```

Heat = 1 / (1 + T \* (ID - 1))  
 (where T = 0.10 is the temperature and ID is the chain number)

MrBayes >

MrBayes v3.2.1 x64

(Bayesian Analysis of Phylogeny)

Distributed under the GNU General Public License

Type "help" or "help <command>" for information  
on the commands that are available.

Type "about" for authorship and general  
information about the program.

MrBayes > exe /Users/msicoli/Ket-NaDene-Typlogical\_noHAX.nex

Executing file "/Users/msicoli/Ket-NaDene-Typlogical\_noHAX.nex"

UNIX line termination

Longest line length = 123

Parsing file

Expecting NEXUS formatted file

Reading data block

Allocated taxon set

Allocated matrix

Defining new matrix with 38 taxa and 116 characters

Data is Standard

Missing data coded as ?

Gaps coded as -

Data matrix is not interleaved

Taxon 1 -> gwi

Taxon 2 -> dgr

Taxon 3 -> scsh

Taxon 4 -> xsl

Taxon 5 -> bea

Taxon 6 -> crx

Taxon 7 -> chp

Taxon 8 -> txc

Taxon 9 -> haa

Taxon 10 -> ing

Taxon 11 -> kuu

Taxon 12 -> hoi

Taxon 13 -> koy

Taxon 14 -> taa

Taxon 15 -> aht

Taxon 16 -> tfn

Taxon 17 -> kkz

Taxon 18 -> tcb

Taxon 19 -> tau

Taxon 20 -> ttmN

Taxon 21 -> tceS

Taxon 22 -> eya

Taxon 23 -> tli

Taxon 24 -> gce

Taxon 25 -> tol

Taxon 26 -> cco

Taxon 27 -> hup

Taxon 28 -> mtl

Taxon 29 -> wlk

Taxon 30 -> kto

```
Taxon 31 -> apc
Taxon 32 -> apw
Taxon 33 -> apj
Taxon 34 -> nav
Taxon 35 -> apk
Taxon 36 -> apl
Taxon 37 -> srs
Taxon 38 -> ket
Successfully read matrix
Setting default partition (does not divide up characters)
Setting model defaults
Seed (for generating default start values) = 1388163552
Adding dummy characters (unobserved site patterns) for division 1
WARNING: There are 38 characters incompatible with the specified
        coding bias. These characters will be excluded.
Setting output file names to "/Users/msicoli/Ket-NaDene-Typlogical_noHAX.nex.run<i>.<plt>"
Exiting data block
Reached end of file
```

```
MrBayes > lset nst=6 rates=gamma
```

```
Setting Rates to Gamma
Successfully set likelihood model parameters
Adding dummy characters (unobserved site patterns) for division 1
WARNING: There are 38 characters incompatible with the specified
        coding bias. These characters will be excluded.
```

```
MrBayes > prset brlenspr=clock:uniform
```

```
Setting Brlenspr to Clock:Uniform
Successfully set prior model parameters
Adding dummy characters (unobserved site patterns) for division 1
WARNING: There are 38 characters incompatible with the specified
        coding bias. These characters will be excluded.
```

```
MrBayes > mcmc ngen=2000000 printfreq=10000 samplefreq=500 nruns=1 nchains=4 savebrlens=yes
filename=DY-27Dec-strict-H-KottOut
```

```
Setting number of generations to 2000000
Setting print frequency to 10000
Setting sample frequency to 500
Setting number of runs to 1
Setting number of chains to 4
Setting chain output file names to "DY-27Dec-strict-H-KottOut.<p/t>"
Successfully set chain parameters
```

```
MrBayes > mcmc
```

```
Running Markov chain
MCMC stamp = 2292685654
Seed = 2059386170
Swapseed = 1388163552
Model settings:
```

```
Data not partitioned --
Datatype = Standard
Coding = Variable
# States = Variable, up to 10
        State frequencies are fixed to be equal
Rates = Gamma
        Gamma shape parameter is uniformly dist-
```

ributed on the interval (0.00,200.00).  
Gamma distribution is approximated using 4 categories.  
Likelihood summarized over all rate categories in each generation.

Active parameters:

Parameters

```
-----  
Statefreq      1  
Shape          2  
Ratemultiplier 3  
Topology       4  
BrLens        5  
Clockrate      6  
-----
```

- 1 -- Parameter = Alpha\_symdir  
Type = Symmetric dirichlet/beta distribution alpha\_i parameter  
Prior = Symmetric dirichlet with fixed(-1.00) variance parameter
- 2 -- Parameter = Alpha  
Type = Shape of scaled gamma distribution of site rates  
Prior = Uniform(0.00,200.00)
- 3 -- Parameter = Ratemultiplier  
Type = Partition-specific rate multiplier  
Prior = Fixed(1.0)
- 4 -- Parameter = Tau  
Type = Topology  
Prior = All topologies equally probable a priori  
Subparam. = V
- 5 -- Parameter = V  
Type = Branch lengths  
Prior = Clock:Uniform  
Tree age has an Exponential(1.000) distribution  
Node ages are not constrained
- 6 -- Parameter = Clockrate  
Type = Base rate of clock  
Prior = Fixed(1.000000)  
The clock rate is constant (strict clock)

Number of taxa = 38

Number of characters = 116

The MCMC sampler will use the following moves:

```
With prob. Chain will use move  
2.38 % Multiplier(Alpha)  
11.90 % ExtSprClock(Tau,V)  
23.81 % NNIClock(Tau,V)  
11.90 % ParsSPRClock(Tau,V)  
47.62 % NodesliderClock(V)  
2.38 % TreeStretch(V)
```

Division 1 has 71 unique site patterns

Initializing conditional likelihoods

Using standard non-SSE likelihood calculator for division 1 (single-precision)

Initial log likelihoods and log prior probs:

Chain 1 -- -1417.300608 -- -87.230988  
Chain 2 -- -1434.196678 -- -87.230988  
Chain 3 -- -1393.517948 -- -87.230988  
Chain 4 -- -1476.315409 -- -87.230988

Chain results (2000000 generations requested):

0 -- [-1417.301] (-1434.197) (-1393.518) (-1476.315)

FILE TRUNCATED

2000000 -- [-887.857] (-889.472) (-887.144) (-885.737) -- 0:00:00

Continue with analysis? (yes/no): n

Analysis completed in 15 mins 30 seconds

Analysis used 866.52 seconds of CPU time

Log likelihood of best state for "cold" chain was -855.15

Acceptance rates for the moves in the "cold" chain:

| With prob. | (last 100) | chain accepted proposals by move |
|------------|------------|----------------------------------|
| 46.0 %     | ( 27 %)    | Multiplier(Alpha)                |
| 19.5 %     | ( 23 %)    | ExtSprClock(Tau,V)               |
| 45.6 %     | ( 50 %)    | NNIClock(Tau,V)                  |
| 16.2 %     | ( 21 %)    | ParsSPRClock(Tau,V)              |
| 71.0 %     | ( 73 %)    | NodesliderClock(V)               |
| 69.6 %     | ( 27 %)    | TreeStretch(V)                   |

Chain swap information:

|            | 1      | 2      | 3    | 4    |
|------------|--------|--------|------|------|
| 1          |        | 0.57   | 0.29 | 0.13 |
| 2   333501 |        |        | 0.62 | 0.34 |
| 3   334725 | 332669 |        |      | 0.64 |
| 4   333645 | 333423 | 332037 |      |      |

Upper diagonal: Proportion of successful state exchanges between chains

Lower diagonal: Number of attempted state exchanges between chains

Chain information:

ID -- Heat  
-----  
1 -- 1.00 (cold chain)  
2 -- 0.91  
3 -- 0.83  
4 -- 0.77

Heat = 1 / (1 + T \* (ID - 1))

(where T = 0.10 is the temperature and ID is the chain number)

MrBayes > sumt relburnin=yes

Using relative burnin (a fraction of samples discarded).

Summarizing trees in file "DY-27Dec-strict-H-KottOut.t"

Using relative burnin ('relburnin=yes'), discarding the first 25 % of sampled trees

Writing statistics to files DY-27Dec-strict-H-KottOut.<parts|tstat|vstat|trprobs|con>



Examining file ...

Found one tree block in file "DY-27Dec-strict-H-KottOut.t" with 4001 trees in last block

Tree reading status:

```
0      10      20      30      40      50      60      70      80      90      100
v-----v-----v-----v-----v-----v-----v-----v-----v-----v-----v
*****
```

Read 4001 trees from last tree block (sampling 3001 of them)

General explanation:

In an unrooted tree, a taxon bipartition (split) is specified by removing a branch, thereby dividing the species into those to the left and those to the right of the branch. Here, taxa to one side of the removed branch are denoted '.' and those to the other side are denoted '\*'. Specifically, the '.' symbol is used for the taxa on the same side as the outgroup.

In a rooted or clock tree, the tree is rooted using the model and not by reference to an outgroup. Each bipartition therefore corresponds to a clade, that is, a group that includes all the descendants of a particular branch in the tree. Taxa that are included in each clade are denoted using '\*', and taxa that are not included are denoted using the '.' symbol.

The output first includes a key to all the bipartitions with frequency larger or equal to (Minpartfreq) in at least one run. Minpartfreq is a parameter to sumt command and currently it is set to 0.10. This is followed by a table with statistics for the informative bipartitions (those including at least two taxa), sorted from highest to lowest probability. For each bipartition, the table gives the number of times the partition or split was observed in all runs (#obs) and the posterior probability of the bipartition (Probab.), which is the same as the split frequency. If several runs are summarized, this is followed by the minimum split frequency (Min(s)), the maximum frequency (Max(s)), and the standard deviation of frequencies (Stddev(s)) across runs. The latter value should approach 0 for all bipartitions as MCMC runs converge.

This is followed by a table summarizing branch lengths, node heights (if a clock model was used) and relaxed clock parameters (if a relaxed clock model was used). The mean, variance, and 95 % credible interval are given for each of these parameters. If several runs are summarized, the potential scale reduction factor (PSRF) is also given; it should approach 1 as runs converge. Node heights will take calibration points into account, if such points were used in the analysis.

Note that Stddev may be unreliable if the partition is not present in all runs (the last column indicates the number of runs that sampled the partition if more than one run is summarized). The PSRF is not calculated at all if the partition is not present in all runs. The PSRF is also sensitive to small sample sizes and it should only be considered a rough guide to convergence since some of the assumptions allowing one to interpret it as a true potential scale reduction factor are violated in MrBayes.

List of taxa in bipartitions:

- 1 -- gwi
- 2 -- dgr
- 3 -- scsh
- 4 -- xsl
- 5 -- bea
- 6 -- crx

```

7 -- chp
8 -- txc
9 -- haa
10 -- ing
11 -- kuu
12 -- hoi
13 -- koy
14 -- taa
15 -- aht
16 -- tfn
17 -- kkz
18 -- tcb
19 -- tau
20 -- ttmN
21 -- tceS
22 -- eya
23 -- tli
24 -- gce
25 -- tol
26 -- cco
27 -- hup
28 -- mtl
29 -- wlk
30 -- kto
31 -- apc
32 -- apw
33 -- apj
34 -- nav
35 -- apk
36 -- apl
37 -- srs
38 -- ket

```

Key to taxon bipartitions (saved to file "DY-27Dec-strict-H-KottOut.parts"):

```

ID -- Partition
-----
0 -- *****
1 -- *.....
2 -- .*.....
3 -- .*. ....
4 -- ..*....
5 -- ...*...
6 -- ....*..
7 -- .....*
8 -- .....*
9 -- .....*
10 -- .....*
11 -- .....*
12 -- .....*
13 -- .....*
14 -- .....*
15 -- .....*
16 -- .....*
17 -- .....*
18 -- .....*
19 -- .....*
20 -- .....*
21 -- .....*
22 -- .....*
23 -- .....*

```

```
24 -- .....*.....
25 -- .....*.....
26 -- .....*.....
27 -- .....*.....
28 -- .....*.....
29 -- .....*.....
30 -- .....*.....
31 -- .....*.....
32 -- .....*.....
33 -- .....*.....
34 -- .....*.....
35 -- .....*.....
36 -- .....*.....
37 -- .....*.....
38 -- .....*.....
39 -- .....**.....
40 -- .....*****.....
41 -- .....**.....
42 -- .....* **.....
43 -- .....**.....
44 -- .....****.....*
45 -- .....****.....
46 -- .....*****.....
47 -- .....* **.....
48 -- .....***.....
49 -- *** **.....
50 -- .....* * * * *.....
51 -- .....****.....
52 -- .....**.....
53 -- .....*.....*.....
54 -- .....**.....
55 -- .....***.....
56 -- ***** * * *****.....
57 -- .....**.....
58 -- .....* * * * *.....
59 -- .....* *.....
60 -- .....* **.....
61 -- .....**.....
62 -- .....* **.....
63 -- .....**.....
64 -- .....**.....
65 -- .....****.....
66 -- **.....
67 -- .....***.....
68 -- **.....
69 -- *****.....
70 -- .....**.....
71 -- ***** ** *****.....
72 -- .....**.....
73 -- .....* **.....
74 -- .....* *.....
75 -- *****.....
76 -- .....* *.....
77 -- .....*** *****.....
78 -- *****.....
79 -- .....* *** **.....
80 -- .....** ***** *.....
81 -- .....* * *.....
82 -- .....* **.....
83 -- ***** * * **.....
84 -- .....* *.....
```



```

66 1131 0.376874
67 1076 0.358547
68 1007 0.335555
69 969 0.322892
70 959 0.319560
71 927 0.308897
72 822 0.273909
73 817 0.272243
74 773 0.257581
75 714 0.237921
76 702 0.233922
77 694 0.231256
78 688 0.229257
79 670 0.223259
80 631 0.210263
81 605 0.201599
82 592 0.197268
83 586 0.195268
84 583 0.194269
85 551 0.183605
86 536 0.178607
87 522 0.173942
88 514 0.171276
89 507 0.168944
90 505 0.168277
91 495 0.164945
92 491 0.163612
93 475 0.158281
94 467 0.155615
95 465 0.154948
96 444 0.147951
97 428 0.142619
98 405 0.134955
99 402 0.133955
100 391 0.130290
101 369 0.122959
102 369 0.122959
103 343 0.114295
104 340 0.113296
105 339 0.112962
106 329 0.109630
107 328 0.109297
108 321 0.106964
109 312 0.103965
110 310 0.103299
111 301 0.100300

```

-----  
Summary statistics for branch and node parameters  
(saved to file "DY-27Dec-strict-H-KottOut.vstat"):

| Parameter | Mean     | Variance | 95% HPD Interval |          | Median   |
|-----------|----------|----------|------------------|----------|----------|
|           |          |          | Lower            | Upper    |          |
| length[1] | 0.054449 | 0.000423 | 0.018219         | 0.095083 | 0.052436 |
| length[2] | 0.055576 | 0.000605 | 0.014802         | 0.102980 | 0.051390 |
| length[3] | 0.048364 | 0.000402 | 0.012873         | 0.086119 | 0.046138 |
| length[4] | 0.037867 | 0.000271 | 0.010269         | 0.071812 | 0.036148 |
| length[5] | 0.046347 | 0.000705 | 0.008326         | 0.103953 | 0.039523 |
| length[6] | 0.036925 | 0.000287 | 0.007704         | 0.070282 | 0.034539 |

|            |          |          |          |          |          |
|------------|----------|----------|----------|----------|----------|
| length[7]  | 0.049322 | 0.000297 | 0.019337 | 0.084931 | 0.047776 |
| length[8]  | 0.111573 | 0.000954 | 0.050016 | 0.169368 | 0.113302 |
| length[9]  | 0.053438 | 0.000251 | 0.022560 | 0.084042 | 0.053188 |
| length[10] | 0.056867 | 0.000568 | 0.017443 | 0.104730 | 0.053392 |
| length[11] | 0.087011 | 0.001061 | 0.021213 | 0.146107 | 0.086051 |
| length[12] | 0.041888 | 0.000311 | 0.012407 | 0.076381 | 0.039884 |
| length[13] | 0.042657 | 0.000321 | 0.011516 | 0.076691 | 0.040719 |
| length[14] | 0.030081 | 0.000243 | 0.005024 | 0.060563 | 0.027108 |
| length[15] | 0.109421 | 0.000973 | 0.047858 | 0.170871 | 0.109624 |
| length[16] | 0.104962 | 0.000964 | 0.046271 | 0.165348 | 0.104496 |
| length[17] | 0.040388 | 0.000296 | 0.010935 | 0.074685 | 0.038735 |
| length[18] | 0.026681 | 0.000191 | 0.004379 | 0.053134 | 0.024092 |
| length[19] | 0.032489 | 0.000249 | 0.004412 | 0.063337 | 0.029896 |
| length[20] | 0.038338 | 0.000229 | 0.011747 | 0.068454 | 0.037193 |
| length[21] | 0.041123 | 0.000258 | 0.010135 | 0.070766 | 0.039669 |
| length[22] | 0.102785 | 0.000988 | 0.045962 | 0.167986 | 0.100090 |
| length[23] | 0.104147 | 0.001110 | 0.045323 | 0.176707 | 0.100463 |
| length[24] | 0.097111 | 0.001100 | 0.037343 | 0.164630 | 0.094226 |
| length[25] | 0.084026 | 0.000924 | 0.031620 | 0.150746 | 0.079829 |
| length[26] | 0.093943 | 0.001101 | 0.034862 | 0.160939 | 0.090343 |
| length[27] | 0.093961 | 0.000871 | 0.043750 | 0.157698 | 0.092037 |
| length[28] | 0.094750 | 0.000840 | 0.035292 | 0.147798 | 0.094445 |
| length[29] | 0.049341 | 0.000448 | 0.014590 | 0.091968 | 0.046311 |
| length[30] | 0.050470 | 0.000532 | 0.010872 | 0.095009 | 0.046651 |
| length[31] | 0.010093 | 0.000084 | 0.000005 | 0.028549 | 0.007484 |
| length[32] | 0.010243 | 0.000088 | 0.000005 | 0.028808 | 0.007595 |
| length[33] | 0.017168 | 0.000126 | 0.000670 | 0.038675 | 0.015014 |
| length[34] | 0.033660 | 0.000208 | 0.007665 | 0.062437 | 0.031529 |
| length[35] | 0.006208 | 0.000044 | 0.000002 | 0.019561 | 0.004109 |
| length[36] | 0.006206 | 0.000044 | 0.000002 | 0.019561 | 0.004109 |
| length[37] | 0.073655 | 0.000668 | 0.024360 | 0.123816 | 0.071672 |
| length[38] | 0.130551 | 0.001076 | 0.070848 | 0.201383 | 0.127650 |
| length[39] | 0.042672 | 0.000346 | 0.007468 | 0.078398 | 0.041266 |
| length[40] | 0.051389 | 0.000596 | 0.007229 | 0.098172 | 0.049300 |
| length[41] | 0.057985 | 0.000691 | 0.009456 | 0.109463 | 0.057551 |
| length[42] | 0.031162 | 0.000286 | 0.001631 | 0.061658 | 0.028856 |
| length[43] | 0.040067 | 0.000524 | 0.002073 | 0.083808 | 0.036867 |
| length[44] | 0.031167 | 0.000267 | 0.003498 | 0.063077 | 0.029304 |
| length[45] | 0.022066 | 0.000199 | 0.000063 | 0.049142 | 0.019226 |
| length[46] | 0.030234 | 0.000411 | 0.000101 | 0.068430 | 0.026662 |
| length[47] | 0.036706 | 0.000546 | 0.000067 | 0.080759 | 0.032316 |
| length[48] | 0.017726 | 0.000162 | 0.000030 | 0.042078 | 0.015193 |
| length[49] | 0.024810 | 0.000358 | 0.000001 | 0.061527 | 0.020683 |
| length[50] | 0.024220 | 0.000162 | 0.001545 | 0.048528 | 0.022528 |
| length[51] | 0.032316 | 0.000621 | 0.000019 | 0.080861 | 0.026772 |
| length[52] | 0.014878 | 0.000130 | 0.000005 | 0.037135 | 0.012318 |
| length[53] | 0.022679 | 0.000185 | 0.000143 | 0.048112 | 0.021055 |
| length[54] | 0.030317 | 0.000356 | 0.000055 | 0.064430 | 0.027206 |
| length[55] | 0.037110 | 0.000523 | 0.000168 | 0.078891 | 0.034026 |
| length[56] | 0.032923 | 0.000309 | 0.002772 | 0.065433 | 0.030538 |
| length[57] | 0.022488 | 0.000261 | 0.000102 | 0.053702 | 0.019761 |
| length[58] | 0.020654 | 0.000179 | 0.000021 | 0.044863 | 0.018649 |
| length[59] | 0.013267 | 0.000119 | 0.000025 | 0.035063 | 0.010518 |
| length[60] | 0.013513 | 0.000087 | 0.000090 | 0.031203 | 0.011711 |
| length[61] | 0.041834 | 0.000746 | 0.000012 | 0.094633 | 0.037036 |
| length[62] | 0.027900 | 0.000350 | 0.000157 | 0.064470 | 0.023927 |
| length[63] | 0.015266 | 0.000145 | 0.000060 | 0.038694 | 0.012761 |
| length[64] | 0.040994 | 0.000724 | 0.000035 | 0.089510 | 0.036625 |
| length[65] | 0.037971 | 0.000539 | 0.000100 | 0.081479 | 0.034941 |
| length[66] | 0.027138 | 0.000279 | 0.000040 | 0.057357 | 0.024815 |
| length[67] | 0.029657 | 0.000429 | 0.000054 | 0.069379 | 0.026347 |

|             |          |          |          |          |          |
|-------------|----------|----------|----------|----------|----------|
| length[68]  | 0.026477 | 0.000263 | 0.000840 | 0.057212 | 0.023941 |
| length[69]  | 0.016362 | 0.000127 | 0.000444 | 0.038932 | 0.014060 |
| length[70]  | 0.015507 | 0.000209 | 0.000031 | 0.044570 | 0.010729 |
| length[71]  | 0.015888 | 0.000122 | 0.000135 | 0.037971 | 0.013718 |
| length[72]  | 0.030459 | 0.000478 | 0.000068 | 0.069929 | 0.026451 |
| length[73]  | 0.024863 | 0.000314 | 0.000022 | 0.057158 | 0.022064 |
| length[74]  | 0.016257 | 0.000240 | 0.000076 | 0.042638 | 0.012599 |
| length[75]  | 0.010750 | 0.000080 | 0.000067 | 0.029945 | 0.008432 |
| length[76]  | 0.021499 | 0.000226 | 0.000123 | 0.048659 | 0.018963 |
| length[77]  | 0.021349 | 0.000209 | 0.000239 | 0.049232 | 0.018843 |
| length[78]  | 0.015384 | 0.000143 | 0.000184 | 0.038514 | 0.012595 |
| length[79]  | 0.031338 | 0.000485 | 0.000571 | 0.075600 | 0.025821 |
| length[80]  | 0.011779 | 0.000083 | 0.000012 | 0.028151 | 0.009912 |
| length[81]  | 0.011318 | 0.000103 | 0.000010 | 0.029903 | 0.008608 |
| length[82]  | 0.020761 | 0.000262 | 0.000019 | 0.052820 | 0.017270 |
| length[83]  | 0.034349 | 0.000351 | 0.003689 | 0.072965 | 0.032539 |
| length[84]  | 0.008866 | 0.000078 | 0.000014 | 0.025897 | 0.006174 |
| length[85]  | 0.024760 | 0.000256 | 0.000165 | 0.054461 | 0.022623 |
| length[86]  | 0.009192 | 0.000078 | 0.000006 | 0.027520 | 0.006575 |
| length[87]  | 0.009517 | 0.000083 | 0.000032 | 0.028384 | 0.006834 |
| length[88]  | 0.008865 | 0.000068 | 0.000023 | 0.025952 | 0.006487 |
| length[89]  | 0.026860 | 0.000237 | 0.002719 | 0.054176 | 0.023358 |
| length[90]  | 0.025015 | 0.000455 | 0.000002 | 0.068353 | 0.018659 |
| length[91]  | 0.031328 | 0.000371 | 0.000143 | 0.063948 | 0.028606 |
| length[92]  | 0.019639 | 0.000135 | 0.000590 | 0.039571 | 0.017539 |
| length[93]  | 0.013364 | 0.000098 | 0.000188 | 0.032557 | 0.011265 |
| length[94]  | 0.018921 | 0.000211 | 0.000075 | 0.045661 | 0.015176 |
| length[95]  | 0.017093 | 0.000177 | 0.000042 | 0.043613 | 0.014086 |
| length[96]  | 0.008680 | 0.000065 | 0.000012 | 0.023806 | 0.006735 |
| length[97]  | 0.008920 | 0.000096 | 0.000038 | 0.029424 | 0.005854 |
| length[98]  | 0.020598 | 0.000172 | 0.001586 | 0.045050 | 0.018578 |
| length[99]  | 0.007228 | 0.000042 | 0.000010 | 0.020461 | 0.005926 |
| length[100] | 0.014138 | 0.000166 | 0.000010 | 0.040139 | 0.010138 |
| length[101] | 0.025287 | 0.000449 | 0.000061 | 0.069402 | 0.019860 |
| length[102] | 0.017802 | 0.000227 | 0.000027 | 0.045997 | 0.013972 |
| length[103] | 0.018385 | 0.000237 | 0.000027 | 0.046422 | 0.014892 |
| length[104] | 0.007535 | 0.000064 | 0.000005 | 0.022641 | 0.005268 |
| length[105] | 0.021322 | 0.000291 | 0.000094 | 0.052097 | 0.016363 |
| length[106] | 0.005706 | 0.000032 | 0.000001 | 0.017623 | 0.004038 |
| length[107] | 0.018733 | 0.000218 | 0.000083 | 0.047045 | 0.015195 |
| length[108] | 0.011491 | 0.000128 | 0.000015 | 0.034212 | 0.008149 |
| length[109] | 0.012310 | 0.000094 | 0.000025 | 0.032929 | 0.009964 |
| length[110] | 0.009118 | 0.000054 | 0.000122 | 0.024559 | 0.007388 |
| length[111] | 0.018784 | 0.000199 | 0.000015 | 0.043957 | 0.016432 |
| height[0]   | 0.172294 | 0.000916 | 0.113402 | 0.233284 | 0.174672 |
| height[1]   | 0.000000 | 0.000000 | 0.000000 | 0.000000 | 0.000000 |
| height[2]   | 0.000000 | 0.000000 | 0.000000 | 0.000000 | 0.000000 |
| height[3]   | 0.000000 | 0.000000 | 0.000000 | 0.000000 | 0.000000 |
| height[4]   | 0.000000 | 0.000000 | 0.000000 | 0.000000 | 0.000000 |
| height[5]   | 0.000000 | 0.000000 | 0.000000 | 0.000000 | 0.000000 |
| height[6]   | 0.000000 | 0.000000 | 0.000000 | 0.000000 | 0.000000 |
| height[7]   | 0.000000 | 0.000000 | 0.000000 | 0.000000 | 0.000000 |
| height[8]   | 0.000000 | 0.000000 | 0.000000 | 0.000000 | 0.000000 |
| height[9]   | 0.000000 | 0.000000 | 0.000000 | 0.000000 | 0.000000 |
| height[10]  | 0.000000 | 0.000000 | 0.000000 | 0.000000 | 0.000000 |
| height[11]  | 0.000000 | 0.000000 | 0.000000 | 0.000000 | 0.000000 |
| height[12]  | 0.000000 | 0.000000 | 0.000000 | 0.000000 | 0.000000 |
| height[13]  | 0.000000 | 0.000000 | 0.000000 | 0.000000 | 0.000000 |
| height[14]  | 0.000000 | 0.000000 | 0.000000 | 0.000000 | 0.000000 |
| height[15]  | 0.000000 | 0.000000 | 0.000000 | 0.000000 | 0.000000 |
| height[16]  | 0.000000 | 0.000000 | 0.000000 | 0.000000 | 0.000000 |

|            |          |          |          |          |          |
|------------|----------|----------|----------|----------|----------|
| height[17] | 0.000000 | 0.000000 | 0.000000 | 0.000000 | 0.000000 |
| height[18] | 0.000000 | 0.000000 | 0.000000 | 0.000000 | 0.000000 |
| height[19] | 0.000000 | 0.000000 | 0.000000 | 0.000000 | 0.000000 |
| height[20] | 0.000000 | 0.000000 | 0.000000 | 0.000000 | 0.000000 |
| height[21] | 0.000000 | 0.000000 | 0.000000 | 0.000000 | 0.000000 |
| height[22] | 0.000000 | 0.000000 | 0.000000 | 0.000000 | 0.000000 |
| height[23] | 0.000000 | 0.000000 | 0.000000 | 0.000000 | 0.000000 |
| height[24] | 0.000000 | 0.000000 | 0.000000 | 0.000000 | 0.000000 |
| height[25] | 0.000000 | 0.000000 | 0.000000 | 0.000000 | 0.000000 |
| height[26] | 0.000000 | 0.000000 | 0.000000 | 0.000000 | 0.000000 |
| height[27] | 0.000000 | 0.000000 | 0.000000 | 0.000000 | 0.000000 |
| height[28] | 0.000000 | 0.000000 | 0.000000 | 0.000000 | 0.000000 |
| height[29] | 0.000000 | 0.000000 | 0.000000 | 0.000000 | 0.000000 |
| height[30] | 0.000000 | 0.000000 | 0.000000 | 0.000000 | 0.000000 |
| height[31] | 0.000000 | 0.000000 | 0.000000 | 0.000000 | 0.000000 |
| height[32] | 0.000000 | 0.000000 | 0.000000 | 0.000000 | 0.000000 |
| height[33] | 0.000000 | 0.000000 | 0.000000 | 0.000000 | 0.000000 |
| height[34] | 0.000000 | 0.000000 | 0.000000 | 0.000000 | 0.000000 |
| height[35] | 0.000000 | 0.000000 | 0.000000 | 0.000000 | 0.000000 |
| height[36] | 0.000000 | 0.000000 | 0.000000 | 0.000000 | 0.000000 |
| height[37] | 0.000000 | 0.000000 | 0.000000 | 0.000000 | 0.000000 |
| height[38] | 0.000000 | 0.000000 | 0.000000 | 0.000000 | 0.000000 |
| height[39] | 0.006176 | 0.000042 | 0.000002 | 0.019496 | 0.004107 |
| height[40] | 0.075504 | 0.000475 | 0.033638 | 0.119355 | 0.073986 |
| height[41] | 0.099606 | 0.000829 | 0.046304 | 0.158104 | 0.098127 |
| height[42] | 0.036252 | 0.000213 | 0.011514 | 0.067249 | 0.034137 |
| height[43] | 0.045474 | 0.000318 | 0.016017 | 0.083808 | 0.043495 |
| height[44] | 0.129177 | 0.000808 | 0.074924 | 0.187367 | 0.128079 |
| height[45] | 0.032771 | 0.000154 | 0.010833 | 0.057402 | 0.031153 |
| height[46] | 0.049798 | 0.000245 | 0.021172 | 0.083455 | 0.048169 |
| height[47] | 0.055858 | 0.000335 | 0.022757 | 0.094216 | 0.054965 |
| height[48] | 0.017229 | 0.000087 | 0.001658 | 0.034822 | 0.015796 |
| height[49] | 0.077481 | 0.000381 | 0.041351 | 0.118199 | 0.077334 |
| height[50] | 0.073777 | 0.000239 | 0.046019 | 0.107582 | 0.073646 |
| height[51] | 0.104035 | 0.000631 | 0.053738 | 0.154049 | 0.103298 |
| height[52] | 0.006830 | 0.000040 | 0.000005 | 0.019640 | 0.004936 |
| height[53] | 0.033004 | 0.000186 | 0.008262 | 0.059734 | 0.031309 |
| height[54] | 0.032521 | 0.000195 | 0.008177 | 0.059552 | 0.030822 |
| height[55] | 0.106386 | 0.000772 | 0.056017 | 0.164955 | 0.105898 |
| height[56] | 0.100228 | 0.000357 | 0.060474 | 0.135097 | 0.100577 |
| height[57] | 0.037022 | 0.000237 | 0.009514 | 0.066090 | 0.035231 |
| height[58] | 0.060966 | 0.000222 | 0.025971 | 0.087120 | 0.061002 |
| height[59] | 0.024394 | 0.000139 | 0.004379 | 0.048558 | 0.022386 |
| height[60] | 0.045366 | 0.000178 | 0.020036 | 0.070539 | 0.044119 |
| height[61] | 0.081918 | 0.000744 | 0.034047 | 0.143477 | 0.079375 |
| height[62] | 0.080808 | 0.000475 | 0.034338 | 0.119651 | 0.079734 |
| height[63] | 0.033673 | 0.000176 | 0.010832 | 0.060398 | 0.032046 |
| height[64] | 0.077174 | 0.000661 | 0.029068 | 0.127486 | 0.075138 |
| height[65] | 0.084764 | 0.000602 | 0.040011 | 0.138355 | 0.083398 |
| height[66] | 0.046331 | 0.000303 | 0.017622 | 0.083144 | 0.044396 |
| height[67] | 0.081315 | 0.000550 | 0.040575 | 0.131587 | 0.079822 |
| height[68] | 0.045314 | 0.000301 | 0.012314 | 0.077890 | 0.043398 |
| height[69] | 0.134530 | 0.000775 | 0.075396 | 0.188005 | 0.136123 |
| height[70] | 0.025066 | 0.000149 | 0.004412 | 0.048929 | 0.023026 |
| height[71] | 0.155112 | 0.000657 | 0.102648 | 0.202915 | 0.157768 |
| height[72] | 0.091931 | 0.000727 | 0.041464 | 0.142478 | 0.091708 |
| height[73] | 0.052192 | 0.000286 | 0.018739 | 0.083597 | 0.050842 |
| height[74] | 0.042274 | 0.000256 | 0.015405 | 0.075982 | 0.040700 |
| height[75] | 0.164974 | 0.000812 | 0.099025 | 0.210920 | 0.167270 |
| height[76] | 0.036072 | 0.000240 | 0.009060 | 0.067098 | 0.034397 |
| height[77] | 0.129710 | 0.000727 | 0.065657 | 0.173948 | 0.131747 |



|             |          |          |          |          |          |
|-------------|----------|----------|----------|----------|----------|
| height[78]  | 0.145461 | 0.000657 | 0.089954 | 0.193435 | 0.147078 |
| height[79]  | 0.074778 | 0.000476 | 0.032087 | 0.117219 | 0.074423 |
| height[80]  | 0.156308 | 0.000765 | 0.103381 | 0.208767 | 0.157763 |
| height[81]  | 0.049558 | 0.000181 | 0.023883 | 0.075394 | 0.049311 |
| height[82]  | 0.056849 | 0.000296 | 0.024353 | 0.090738 | 0.055694 |
| height[83]  | 0.088830 | 0.000331 | 0.053595 | 0.125468 | 0.089348 |
| height[84]  | 0.040518 | 0.000202 | 0.013979 | 0.066708 | 0.039533 |
| height[85]  | 0.062392 | 0.000293 | 0.028514 | 0.091915 | 0.062108 |
| height[86]  | 0.009967 | 0.000049 | 0.000428 | 0.024448 | 0.008626 |
| height[87]  | 0.040952 | 0.000163 | 0.018814 | 0.068462 | 0.040491 |
| height[88]  | 0.010039 | 0.000052 | 0.000719 | 0.023641 | 0.008723 |
| height[89]  | 0.090147 | 0.000510 | 0.042683 | 0.133620 | 0.090709 |
| height[90]  | 0.096927 | 0.000661 | 0.043267 | 0.142313 | 0.097523 |
| height[91]  | 0.106244 | 0.000605 | 0.069138 | 0.161721 | 0.105791 |
| height[92]  | 0.127540 | 0.000461 | 0.091617 | 0.172530 | 0.126691 |
| height[93]  | 0.146658 | 0.000828 | 0.086873 | 0.203633 | 0.148551 |
| height[94]  | 0.062662 | 0.000356 | 0.025930 | 0.094709 | 0.061964 |
| height[95]  | 0.051165 | 0.000294 | 0.019690 | 0.085856 | 0.049554 |
| height[96]  | 0.056599 | 0.000176 | 0.032749 | 0.087259 | 0.055717 |
| height[97]  | 0.028235 | 0.000152 | 0.005905 | 0.052280 | 0.026791 |
| height[98]  | 0.031112 | 0.000168 | 0.008715 | 0.057093 | 0.030661 |
| height[99]  | 0.055622 | 0.000205 | 0.027309 | 0.085748 | 0.055357 |
| height[100] | 0.061707 | 0.000347 | 0.023095 | 0.094037 | 0.060873 |
| height[101] | 0.089084 | 0.000744 | 0.039672 | 0.144949 | 0.087597 |
| height[102] | 0.112629 | 0.000585 | 0.064082 | 0.159265 | 0.114852 |
| height[103] | 0.129570 | 0.000560 | 0.087017 | 0.177854 | 0.130853 |
| height[104] | 0.026445 | 0.000103 | 0.009616 | 0.049237 | 0.024905 |
| height[105] | 0.101570 | 0.000637 | 0.059218 | 0.154763 | 0.100521 |
| height[106] | 0.167112 | 0.000933 | 0.106008 | 0.230799 | 0.170105 |
| height[107] | 0.087263 | 0.000559 | 0.038374 | 0.132959 | 0.087746 |
| height[108] | 0.045025 | 0.000247 | 0.021776 | 0.081468 | 0.042960 |
| height[109] | 0.053791 | 0.000186 | 0.026654 | 0.077140 | 0.053404 |
| height[110] | 0.156358 | 0.000872 | 0.089920 | 0.215197 | 0.158977 |
| height[111] | 0.113166 | 0.000721 | 0.049077 | 0.163481 | 0.114773 |

Clade credibility values:

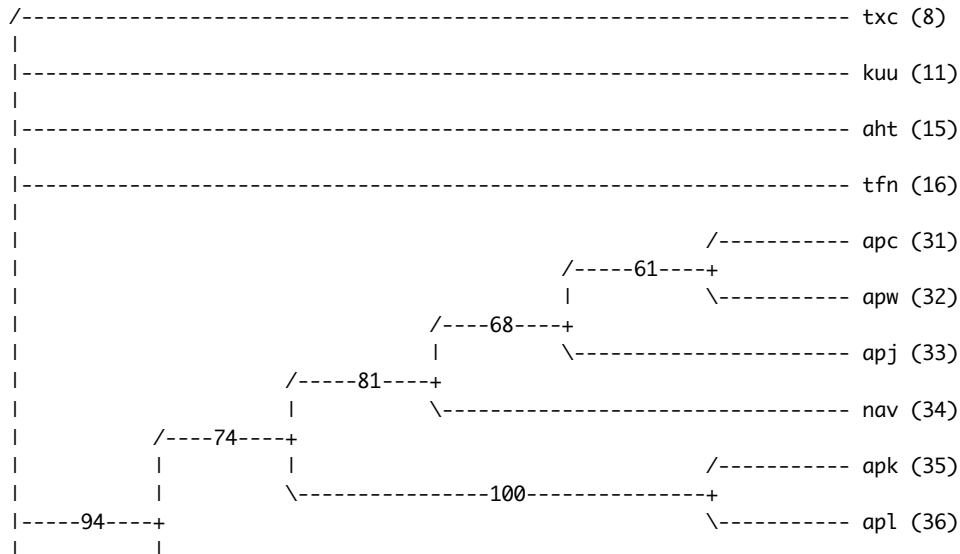

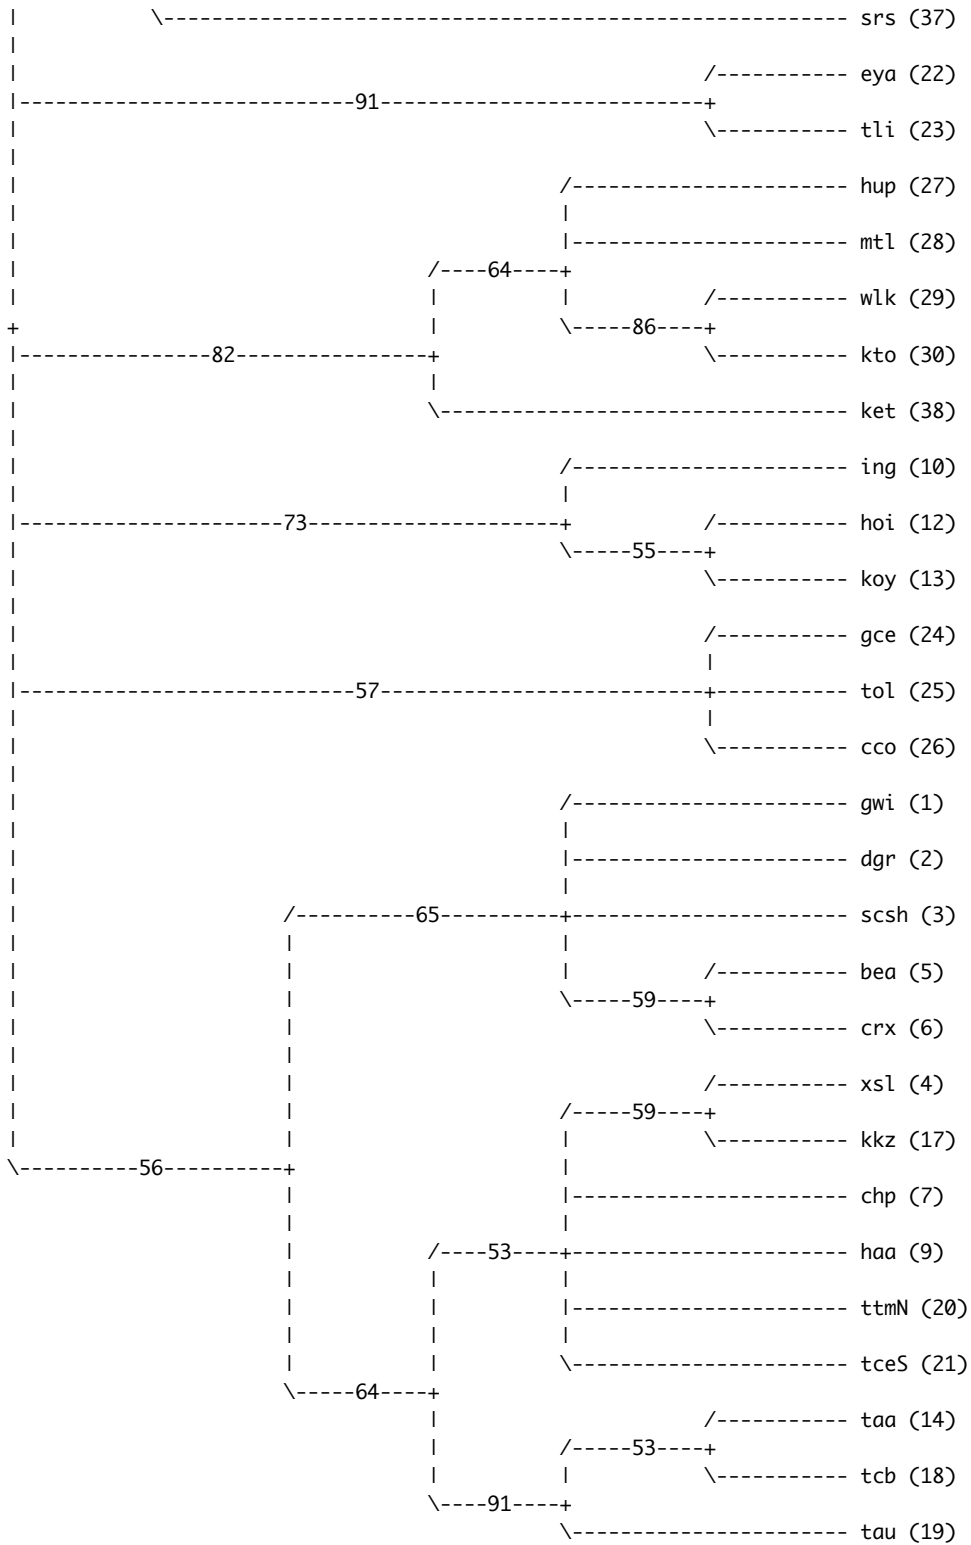

Phylogram (based on median node depths):

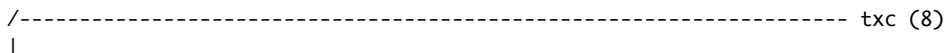

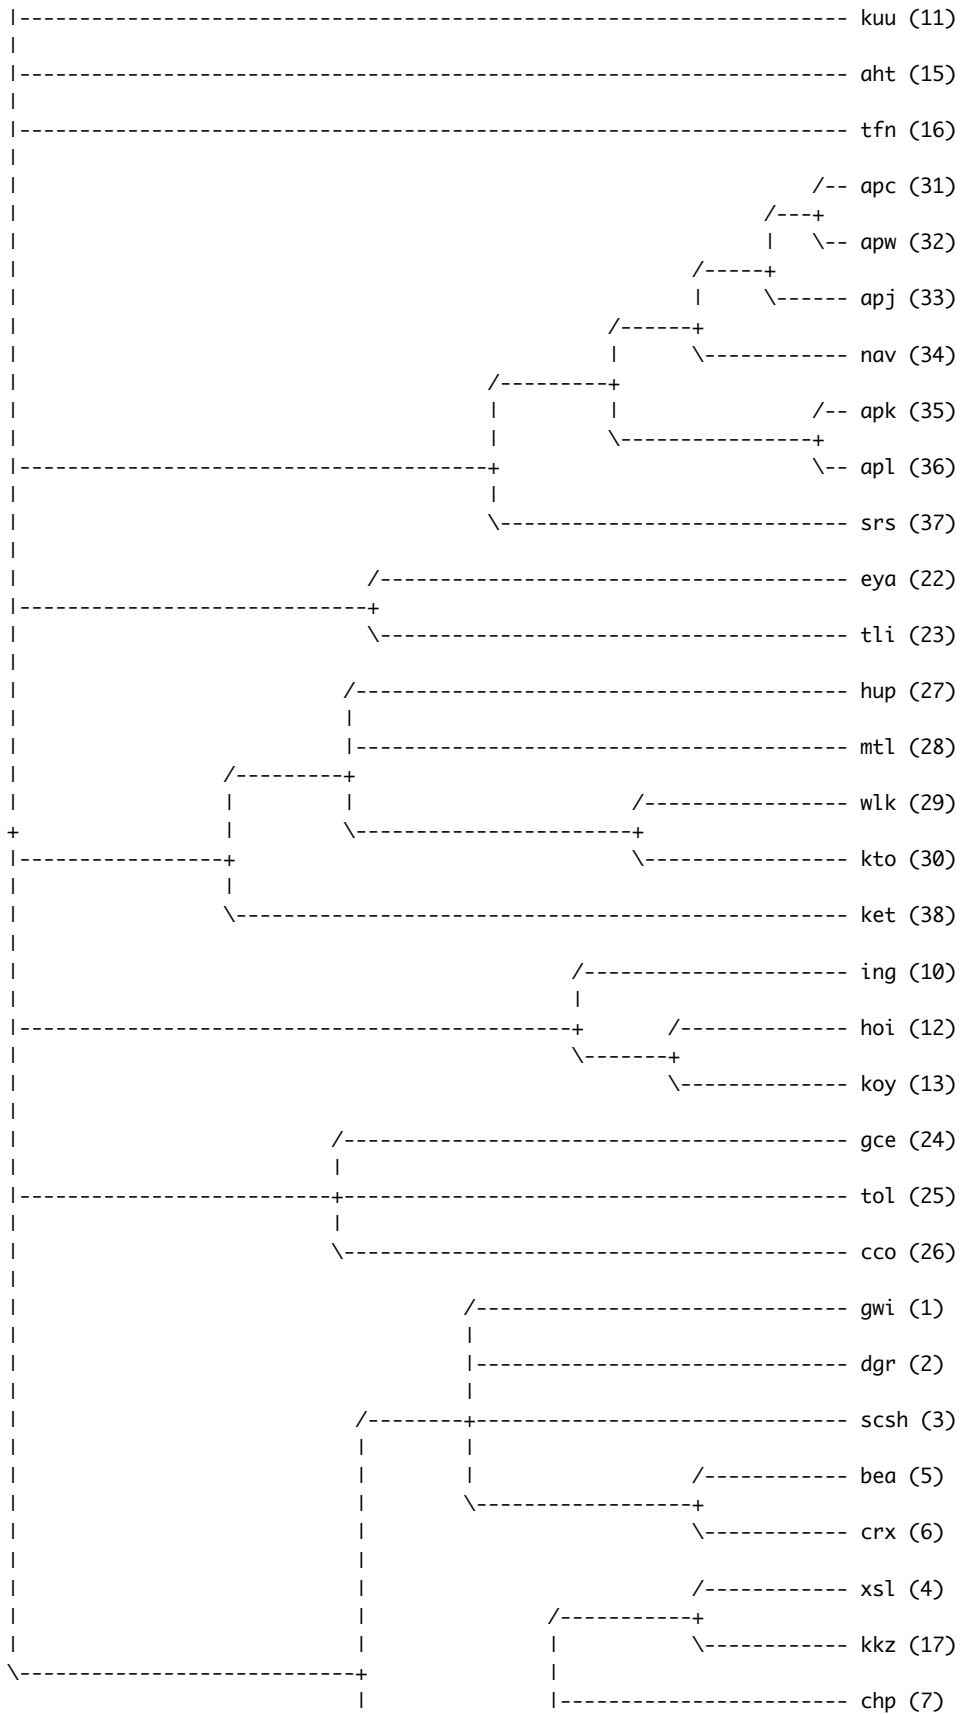

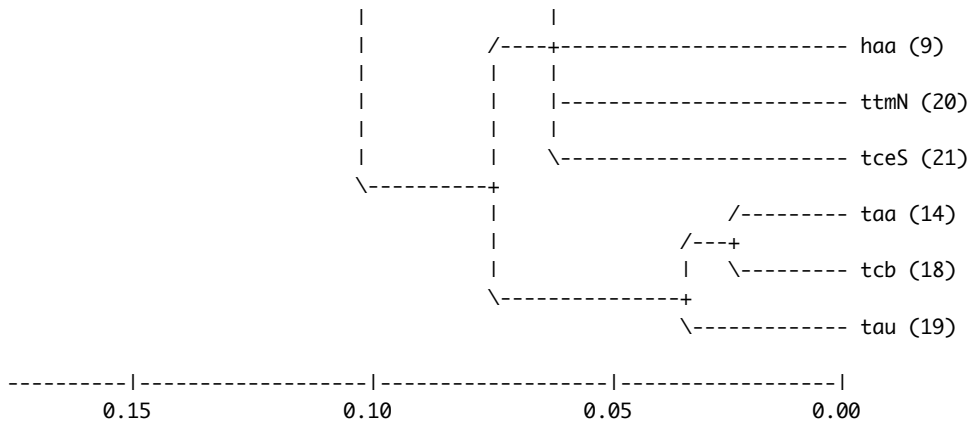

[Expected changes per site]

Calculating tree probabilities...

Credible sets of trees (3001 trees sampled):

- 50 % credible set contains 1501 trees
- 90 % credible set contains 2701 trees
- 95 % credible set contains 2851 trees
- 99 % credible set contains 2971 trees

MrBayes v3.2.1 x64

(Bayesian Analysis of Phylogeny)

Distributed under the GNU General Public License

Type "help" or "help <command>" for information  
on the commands that are available.

Type "about" for authorship and general  
information about the program.

MrBayes > exe /Users/msicoli/Kott-NaDene-Typlogical\_noHAX.nex

Executing file "/Users/msicoli/Kott-NaDene-Typlogical\_noHAX.nex"

UNIX line termination

Longest line length = 123

Parsing file

Expecting NEXUS formatted file

Reading data block

Allocated taxon set

Allocated matrix

Defining new matrix with 38 taxa and 116 characters

Data is Standard

Missing data coded as ?

Gaps coded as -

Data matrix is not interleaved

Taxon 1 -> gwi

Taxon 2 -> dgr

Taxon 3 -> scsh  
Taxon 4 -> xsl  
Taxon 5 -> bea  
Taxon 6 -> crx  
Taxon 7 -> chp  
Taxon 8 -> txc  
Taxon 9 -> haa  
Taxon 10 -> ing  
Taxon 11 -> kuu  
Taxon 12 -> hoi  
Taxon 13 -> koy  
Taxon 14 -> taa  
Taxon 15 -> aht  
Taxon 16 -> tfn  
Taxon 17 -> kkz  
Taxon 18 -> tcb  
Taxon 19 -> tau  
Taxon 20 -> ttmN  
Taxon 21 -> tceS  
Taxon 22 -> eya  
Taxon 23 -> tli  
Taxon 24 -> gce  
Taxon 25 -> tol  
Taxon 26 -> cco  
Taxon 27 -> hup  
Taxon 28 -> mtl  
Taxon 29 -> wlk  
Taxon 30 -> kto  
Taxon 31 -> apc  
Taxon 32 -> apw  
Taxon 33 -> apj  
Taxon 34 -> nav  
Taxon 35 -> apk  
Taxon 36 -> apl  
Taxon 37 -> srs  
Taxon 38 -> zko

Successfully read matrix

Setting default partition (does not divide up characters)

Setting model defaults

Seed (for generating default start values) = 1388166360

Adding dummy characters (unobserved site patterns) for division 1

WARNING: There are 37 characters incompatible with the specified coding bias. These characters will be excluded.

Setting output file names to "/Users/msicoli/Kott-NaDene-Typtological\_noHAX.nex.run<i>.<plt>"

Exiting data block

Reached end of file

MrBayes > lset nst=6 rates=gamma

Setting Rates to Gamma

Successfully set likelihood model parameters

Adding dummy characters (unobserved site patterns) for division 1

WARNING: There are 37 characters incompatible with the specified coding bias. These characters will be excluded.

MrBayes > prset brlenspr=clock:uniform

Setting Brlenspr to Clock:Uniform

Successfully set prior model parameters

Adding dummy characters (unobserved site patterns) for division 1

WARNING: There are 37 characters incompatible with the specified

coding bias. These characters will be excluded.

```
MrBayes > mcmc ngen=2000000 printfreq=10000 samplefreq=500 nruns=1 nchains=4 savebrlens=yes  
filename=DY-27Dec-strict-H-Ketout
```

```
Setting number of generations to 2000000  
Setting print frequency to 10000  
Setting sample frequency to 500  
Setting number of runs to 1  
Setting number of chains to 4  
Setting chain output file names to "DY-27Dec-strict-H-Ketout.<p/t>"  
Successfully set chain parameters
```

```
MrBayes > mcmc
```

```
Running Markov chain  
MCMC stamp = 3571666900  
Seed = 498838383  
Swapseed = 1388166360  
Model settings:
```

```
Data not partitioned --  
Datatype = Standard  
Coding = Variable  
# States = Variable, up to 10  
State frequencies are fixed to be equal  
Rates = Gamma  
Gamma shape parameter is uniformly distributed on the interval (0.00,200.00).  
Gamma distribution is approximated using 4 categories.  
Likelihood summarized over all rate categories in each generation.
```

```
Active parameters:
```

```
Parameters  
-----  
Statefreq      1  
Shape          2  
Ratemultiplier 3  
Topology       4  
Brlens         5  
Clockrate      6  
-----  
1 -- Parameter = Alpha_symdir  
   Type       = Symmetric dirichlet/beta distribution alpha_i parameter  
   Prior      = Symmetric dirichlet with fixed(-1.00) variance parameter  
  
2 -- Parameter = Alpha  
   Type       = Shape of scaled gamma distribution of site rates  
   Prior      = Uniform(0.00,200.00)  
  
3 -- Parameter = Ratemultiplier  
   Type       = Partition-specific rate multiplier  
   Prior      = Fixed(1.0)  
  
4 -- Parameter = Tau  
   Type       = Topology  
   Prior      = All topologies equally probable a priori  
   Subparam. = V
```

```

5 -- Parameter = V
   Type       = Branch lengths
   Prior      = Clock:Uniform
              Tree age has an Exponential(1.000) distribution
              Node ages are not constrained

6 -- Parameter = Clockrate
   Type       = Base rate of clock
   Prior      = Fixed(1.000000)
              The clock rate is constant (strict clock)

```

Number of taxa = 38  
Number of characters = 116

The MCMC sampler will use the following moves:

```

With prob. Chain will use move
 2.38 % Multiplier(Alpha)
11.90 % ExtSprClock(Tau,V)
23.81 % NNIClock(Tau,V)
11.90 % ParsSPRClock(Tau,V)
47.62 % NodesliderClock(V)
 2.38 % TreeStretch(V)

```

Division 1 has 73 unique site patterns  
Initializing conditional likelihoods  
Using standard non-SSE likelihood calculator for division 1 (single-precision)

Initial log likelihoods and log prior probs:

```

Chain 1 -- -1436.616125 -- -87.230988
Chain 2 -- -1499.059192 -- -87.230988
Chain 3 -- -1473.869674 -- -87.230988
Chain 4 -- -1572.409710 -- -87.230988

```

Chain results (2000000 generations requested):

```

0 -- [-1436.616] (-1499.059) (-1473.870) (-1572.410)

```

FILE TRUNCATED

```

2000000 -- (-900.513) (-901.708) (-905.373) [-897.352] -- 0:00:00

```

Continue with analysis? (yes/no): n

Analysis completed in 15 mins 25 seconds  
Analysis used 898.11 seconds of CPU time  
Log likelihood of best state for "cold" chain was -867.29

Acceptance rates for the moves in the "cold" chain:

```

With prob. (last 100) chain accepted proposals by move
 39.8 % ( 30 %) Multiplier(Alpha)
 19.9 % ( 17 %) ExtSprClock(Tau,V)
 45.9 % ( 48 %) NNIClock(Tau,V)
 16.2 % ( 16 %) ParsSPRClock(Tau,V)
 71.2 % ( 74 %) NodesliderClock(V)
 69.8 % ( 28 %) TreeStretch(V)

```

Chain swap information:

```

1      2      3      4

```

```

-----
1 |           0.51   0.25   0.11
2 | 332145         0.61   0.33
3 | 334117 333593         0.63
4 | 333322 333079 333744

```

Upper diagonal: Proportion of successful state exchanges between chains

Lower diagonal: Number of attempted state exchanges between chains

Chain information:

```

ID -- Heat
-----
1 -- 1.00 (cold chain)
2 -- 0.91
3 -- 0.83
4 -- 0.77

```

Heat =  $1 / (1 + T * (ID - 1))$

(where T = 0.10 is the temperature and ID is the chain number)

MrBayes > sumt relburnin=yes

```

Using relative burnin (a fraction of samples discarded).
Summarizing trees in file "DY-27Dec-strict-H-Ketout.t"
Using relative burnin ('relburnin=yes'), discarding the first 25 % of sampled trees
Writing statistics to files DY-27Dec-strict-H-Ketout.<partsltstat|vstat|trprobs|con>
Examining file ...
Found one tree block in file "DY-27Dec-strict-H-Ketout.t" with 4001 trees in last block

```

Tree reading status:

```

0      10      20      30      40      50      60      70      80      90      100
v-----v-----v-----v-----v-----v-----v-----v-----v-----v-----v
*****

```

Read 4001 trees from last tree block (sampling 3001 of them)

General explanation:

In an unrooted tree, a taxon bipartition (split) is specified by removing a branch, thereby dividing the species into those to the left and those to the right of the branch. Here, taxa to one side of the removed branch are denoted '.' and those to the other side are denoted '\*'. Specifically, the '.' symbol is used for the taxa on the same side as the outgroup.

In a rooted or clock tree, the tree is rooted using the model and not by reference to an outgroup. Each bipartition therefore corresponds to a clade, that is, a group that includes all the descendants of a particular branch in the tree. Taxa that are included in each clade are denoted using '\*', and taxa that are not included are denoted using the '.' symbol.

The output first includes a key to all the bipartitions with frequency larger or equal to (Minpartfreq) in at least one run. Minpartfreq is a parameter to sumt command and currently it is set to 0.10. This is followed by a table with statistics for the informative bipartitions (those including at least two taxa), sorted from highest to lowest probability. For each bipartition, the table gives the number of times the partition or split was observed in all runs (#obs) and the posterior probability of the bipartition (Probab.), which is the same as the split frequency. If several runs are summarized, this is



followed by the minimum split frequency (Min(s)), the maximum frequency (Max(s)), and the standard deviation of frequencies (Stddev(s)) across runs. The latter value should approach 0 for all bipartitions as MCMC runs converge.

This is followed by a table summarizing branch lengths, node heights (if a clock model was used) and relaxed clock parameters (if a relaxed clock model was used). The mean, variance, and 95 % credible interval are given for each of these parameters. If several runs are summarized, the potential scale reduction factor (PSRF) is also given; it should approach 1 as runs converge. Node heights will take calibration points into account, if such points were used in the analysis.

Note that Stddev may be unreliable if the partition is not present in all runs (the last column indicates the number of runs that sampled the partition if more than one run is summarized). The PSRF is not calculated at all if the partition is not present in all runs. The PSRF is also sensitive to small sample sizes and it should only be considered a rough guide to convergence since some of the assumptions allowing one to interpret it as a true potential scale reduction factor are violated in MrBayes.

List of taxa in bipartitions:

- 1 -- gwi
- 2 -- dgr
- 3 -- scsh
- 4 -- xsl
- 5 -- bea
- 6 -- crx
- 7 -- chp
- 8 -- txc
- 9 -- haa
- 10 -- ing
- 11 -- kuu
- 12 -- hoi
- 13 -- koy
- 14 -- taa
- 15 -- aht
- 16 -- tfn
- 17 -- kkz
- 18 -- tcb
- 19 -- tau
- 20 -- ttmN
- 21 -- tceS
- 22 -- eya
- 23 -- tli
- 24 -- gce
- 25 -- tol
- 26 -- cco
- 27 -- hup
- 28 -- mtl
- 29 -- wlk
- 30 -- kto
- 31 -- apc
- 32 -- apw
- 33 -- apj
- 34 -- nav
- 35 -- apk
- 36 -- apl
- 37 -- srs
- 38 -- zko

Key to taxon bipartitions (saved to file "DY-27Dec-strict-H-Ketout.parts"):

```
ID -- Partition
-----
0 -- *****
1 -- *.....
2 -- .*.....
3 -- .*. ....
4 -- ..* ..
5 -- ...* ..
6 -- ....* ..
7 -- .....* ..
8 -- .....* ..
9 -- .....* ..
10 -- .....* ..
11 -- .....* ..
12 -- .....* ..
13 -- .....* ..
14 -- .....* ..
15 -- .....* ..
16 -- .....* ..
17 -- .....* ..
18 -- .....* ..
19 -- .....* ..
20 -- .....* ..
21 -- .....* ..
22 -- .....* ..
23 -- .....* ..
24 -- .....* ..
25 -- .....* ..
26 -- .....* ..
27 -- .....* ..
28 -- .....* ..
29 -- .....* ..
30 -- .....* ..
31 -- .....* ..
32 -- .....* ..
33 -- .....* ..
34 -- .....* ..
35 -- .....* ..
36 -- .....* ..
37 -- .....* ..
38 -- .....* ..
39 -- .....** ..
40 -- .....***** ..
41 -- .....** ..
42 -- .....** ..
43 -- .....** ..
44 -- .....**** ..
45 -- .....**** ..
46 -- .....* ** ..
47 -- .....***** ..
48 -- *** ** ..
49 -- .....*** ..
50 -- .....* * * * * ..
51 -- .....* ..
52 -- .....** ..
53 -- .....** ..
54 -- .....** ..
55 -- .....* * * * * ..
56 -- .....*** ..
```

```

57 -- .....*.....**.....
58 -- .....*.....*.....
59 -- *****.*.....*.....*****
60 -- .....**.....
61 -- .....**.....
62 -- .....**.....
63 -- .....***.....
64 -- .....****.....
65 -- .....*.....**.....
66 -- .....****.....*
67 -- **.....
68 -- .....**.....
69 -- **.....
70 -- *****.....**.....*****
71 -- ..*.....**.....
72 -- ..*.....**.....***.....*****
73 -- .....**.....
74 -- *****.....
75 -- .....*.....*.....
76 -- .....*.....***.....**.....
77 -- ..*.....*.....
78 -- *****.....*****
79 -- ..*.....*.....*.....
80 -- *****.....
81 -- *****.....*****
82 -- ..*.....**.....
83 -- ..*.....**.....
84 -- .....*.....*.....*.....*
85 -- .....*.....*.....
86 -- .....*.....*.....*****
87 -- .....*.....*.....
88 -- .....***.....*****
89 -- .....**.....
90 -- .....***.....
91 -- .....*.....*.....
92 -- .....*.....*.....**.....
93 -- ***.....*.....
94 -- *****.*.....*.....*****.....*****
95 -- .....**.....
96 -- ***.....
97 -- .....*****.....
98 -- *****.*.....**.....*.....*****
99 -- .....**.....*.....
100 -- .....*.....*.....
101 -- .....*.....*.....
102 -- *****.*.....*.....**.....
103 -- .....*.....*.....**.....
104 -- *****.....*****.....*****
105 -- .....*.....*.....
106 -- ..*.....*.....
107 -- .....*.....*.....
108 -- .....**.....**.....****.....*
109 -- .....*.....*.....
110 -- .....*.....*.....*.....
111 -- .....*.....**.....
-----

```

Summary statistics for informative taxon bipartitions (clades)  
(saved to file "DY-27Dec-strict-H-Ketout.tstat"):

ID #obs Probab.

-----  
39 3000 0.999667  
40 2770 0.923026  
41 2616 0.871709  
42 2579 0.859380  
43 2536 0.845052  
44 2493 0.830723  
45 2469 0.822726  
46 2273 0.757414  
47 2208 0.735755  
48 2091 0.696768  
49 1990 0.663112  
50 1873 0.624125  
51 1848 0.615795  
52 1826 0.608464  
53 1802 0.600467  
54 1723 0.574142  
55 1642 0.547151  
56 1611 0.536821  
57 1536 0.511829  
58 1529 0.509497  
59 1492 0.497168  
60 1310 0.436521  
61 1275 0.424858  
62 1247 0.415528  
63 1172 0.390536  
64 1146 0.381873  
65 1144 0.381206  
66 1129 0.376208  
67 1110 0.369877  
68 1052 0.350550  
69 945 0.314895  
70 920 0.306564  
71 859 0.286238  
72 843 0.280906  
73 778 0.259247  
74 758 0.252582  
75 741 0.246918  
76 725 0.241586  
77 712 0.237254  
78 701 0.233589  
79 680 0.226591  
80 674 0.224592  
81 664 0.221260  
82 580 0.193269  
83 576 0.191936  
84 554 0.184605  
85 552 0.183939  
86 543 0.180940  
87 537 0.178940  
88 533 0.177607  
89 512 0.170610  
90 488 0.162612  
91 474 0.157947  
92 471 0.156948  
93 452 0.150616  
94 420 0.139953  
95 418 0.139287  
96 416 0.138620  
97 413 0.137621  
98 403 0.134289

```

99 378 0.125958
100 373 0.124292
101 371 0.123625
102 366 0.121959
103 356 0.118627
104 351 0.116961
105 344 0.114628
106 339 0.112962
107 337 0.112296
108 316 0.105298
109 311 0.103632
110 308 0.102632
111 303 0.100966
-----

```

Summary statistics for branch and node parameters  
(saved to file "DY-27Dec-strict-H-Ketout.vstat"):

| Parameter  | Mean     | Variance | 95% HPD Interval |          | Median   |
|------------|----------|----------|------------------|----------|----------|
|            |          |          | Lower            | Upper    |          |
| length[1]  | 0.052545 | 0.000471 | 0.011730         | 0.093428 | 0.050256 |
| length[2]  | 0.053626 | 0.000632 | 0.014504         | 0.105335 | 0.049081 |
| length[3]  | 0.046066 | 0.000415 | 0.011731         | 0.085941 | 0.044023 |
| length[4]  | 0.035983 | 0.000287 | 0.008153         | 0.070499 | 0.033569 |
| length[5]  | 0.044289 | 0.000742 | 0.005749         | 0.101774 | 0.037527 |
| length[6]  | 0.035011 | 0.000301 | 0.006534         | 0.069443 | 0.032513 |
| length[7]  | 0.046579 | 0.000323 | 0.015862         | 0.082167 | 0.044973 |
| length[8]  | 0.106981 | 0.001158 | 0.037343         | 0.167190 | 0.107333 |
| length[9]  | 0.051025 | 0.000296 | 0.016946         | 0.082941 | 0.050555 |
| length[10] | 0.052613 | 0.000605 | 0.011542         | 0.100596 | 0.048617 |
| length[11] | 0.085711 | 0.001215 | 0.022021         | 0.152710 | 0.084126 |
| length[12] | 0.038011 | 0.000299 | 0.008160         | 0.071208 | 0.035729 |
| length[13] | 0.038860 | 0.000316 | 0.008114         | 0.072726 | 0.036443 |
| length[14] | 0.029709 | 0.000258 | 0.004829         | 0.062037 | 0.026441 |
| length[15] | 0.103577 | 0.001155 | 0.035865         | 0.166033 | 0.102898 |
| length[16] | 0.100245 | 0.001154 | 0.037135         | 0.165366 | 0.099380 |
| length[17] | 0.037992 | 0.000308 | 0.008153         | 0.072077 | 0.035703 |
| length[18] | 0.025773 | 0.000195 | 0.003009         | 0.052544 | 0.023337 |
| length[19] | 0.031665 | 0.000271 | 0.004877         | 0.064799 | 0.028605 |
| length[20] | 0.036646 | 0.000248 | 0.008868         | 0.067156 | 0.035516 |
| length[21] | 0.038464 | 0.000260 | 0.009657         | 0.068485 | 0.037315 |
| length[22] | 0.100333 | 0.001277 | 0.033498         | 0.170833 | 0.096747 |
| length[23] | 0.103392 | 0.001574 | 0.033635         | 0.187098 | 0.097154 |
| length[24] | 0.092903 | 0.001244 | 0.030557         | 0.162659 | 0.090141 |
| length[25] | 0.079551 | 0.001012 | 0.024023         | 0.144246 | 0.076243 |
| length[26] | 0.087651 | 0.001107 | 0.025270         | 0.150085 | 0.085602 |
| length[27] | 0.087018 | 0.001072 | 0.027935         | 0.153990 | 0.083961 |
| length[28] | 0.084351 | 0.001013 | 0.025498         | 0.147576 | 0.082180 |
| length[29] | 0.044622 | 0.000425 | 0.009227         | 0.083197 | 0.041859 |
| length[30] | 0.046102 | 0.000491 | 0.007559         | 0.088895 | 0.042465 |
| length[31] | 0.008993 | 0.000068 | 0.000007         | 0.025746 | 0.006587 |
| length[32] | 0.009297 | 0.000074 | 0.000007         | 0.026664 | 0.006799 |
| length[33] | 0.015643 | 0.000115 | 0.000154         | 0.036355 | 0.013337 |
| length[34] | 0.030651 | 0.000203 | 0.007526         | 0.058370 | 0.028582 |
| length[35] | 0.005603 | 0.000036 | 0.000001         | 0.017584 | 0.003782 |
| length[36] | 0.005600 | 0.000036 | 0.000001         | 0.017581 | 0.003782 |
| length[37] | 0.069449 | 0.000734 | 0.019469         | 0.118805 | 0.067191 |
| length[38] | 0.158643 | 0.001994 | 0.054699         | 0.234909 | 0.160000 |
| length[39] | 0.040365 | 0.000341 | 0.006959         | 0.075273 | 0.038765 |

|             |          |          |          |          |          |
|-------------|----------|----------|----------|----------|----------|
| length[40]  | 0.047753 | 0.000635 | 0.005567 | 0.097586 | 0.044548 |
| length[41]  | 0.057113 | 0.000835 | 0.006556 | 0.112697 | 0.054881 |
| length[42]  | 0.029107 | 0.000297 | 0.000382 | 0.060378 | 0.026958 |
| length[43]  | 0.037934 | 0.000539 | 0.001025 | 0.081658 | 0.034029 |
| length[44]  | 0.020890 | 0.000199 | 0.000087 | 0.048830 | 0.017930 |
| length[45]  | 0.048450 | 0.000856 | 0.000101 | 0.102490 | 0.044797 |
| length[46]  | 0.035039 | 0.000538 | 0.000010 | 0.081008 | 0.030077 |
| length[47]  | 0.029151 | 0.000400 | 0.000122 | 0.068535 | 0.025530 |
| length[48]  | 0.027100 | 0.000404 | 0.000083 | 0.066414 | 0.022999 |
| length[49]  | 0.016751 | 0.000150 | 0.000010 | 0.040393 | 0.014357 |
| length[50]  | 0.024557 | 0.000188 | 0.001331 | 0.051284 | 0.022423 |
| length[51]  | 0.021586 | 0.000190 | 0.000001 | 0.047066 | 0.019168 |
| length[52]  | 0.013709 | 0.000115 | 0.000020 | 0.034331 | 0.011414 |
| length[53]  | 0.028674 | 0.000380 | 0.000041 | 0.065200 | 0.024605 |
| length[54]  | 0.021312 | 0.000261 | 0.000007 | 0.051954 | 0.017408 |
| length[55]  | 0.019254 | 0.000195 | 0.000033 | 0.044893 | 0.016565 |
| length[56]  | 0.036245 | 0.000556 | 0.000085 | 0.079819 | 0.032101 |
| length[57]  | 0.013407 | 0.000092 | 0.000071 | 0.032521 | 0.011174 |
| length[58]  | 0.013132 | 0.000118 | 0.000023 | 0.034532 | 0.009872 |
| length[59]  | 0.034345 | 0.000356 | 0.001157 | 0.068458 | 0.031979 |
| length[60]  | 0.014242 | 0.000135 | 0.000010 | 0.037572 | 0.011360 |
| length[61]  | 0.037941 | 0.000684 | 0.000000 | 0.087112 | 0.033009 |
| length[62]  | 0.037205 | 0.000659 | 0.000002 | 0.087156 | 0.032786 |
| length[63]  | 0.029123 | 0.000503 | 0.000009 | 0.072601 | 0.024051 |
| length[64]  | 0.035636 | 0.000565 | 0.000172 | 0.081616 | 0.031328 |
| length[65]  | 0.026188 | 0.000403 | 0.000021 | 0.064782 | 0.021879 |
| length[66]  | 0.021513 | 0.000217 | 0.000031 | 0.049017 | 0.018573 |
| length[67]  | 0.025137 | 0.000272 | 0.000098 | 0.055208 | 0.022450 |
| length[68]  | 0.015626 | 0.000215 | 0.000000 | 0.044657 | 0.011387 |
| length[69]  | 0.024578 | 0.000264 | 0.000150 | 0.056420 | 0.021325 |
| length[70]  | 0.019466 | 0.000179 | 0.000027 | 0.046735 | 0.016864 |
| length[71]  | 0.022772 | 0.000343 | 0.000032 | 0.057702 | 0.018628 |
| length[72]  | 0.027075 | 0.000256 | 0.003510 | 0.056837 | 0.023768 |
| length[73]  | 0.031277 | 0.000461 | 0.000032 | 0.070870 | 0.026828 |
| length[74]  | 0.016037 | 0.000248 | 0.000003 | 0.046983 | 0.011055 |
| length[75]  | 0.013923 | 0.000164 | 0.000035 | 0.036641 | 0.010066 |
| length[76]  | 0.026362 | 0.000460 | 0.000012 | 0.069172 | 0.020725 |
| length[77]  | 0.021290 | 0.000238 | 0.000013 | 0.050616 | 0.018045 |
| length[78]  | 0.013461 | 0.000132 | 0.000035 | 0.036084 | 0.010575 |
| length[79]  | 0.010412 | 0.000086 | 0.000007 | 0.030265 | 0.007803 |
| length[80]  | 0.015800 | 0.000148 | 0.000070 | 0.038033 | 0.013217 |
| length[81]  | 0.016367 | 0.000176 | 0.000173 | 0.039703 | 0.012740 |
| length[82]  | 0.023551 | 0.000267 | 0.000175 | 0.054458 | 0.020202 |
| length[83]  | 0.019116 | 0.000239 | 0.000081 | 0.049405 | 0.015598 |
| length[84]  | 0.009020 | 0.000074 | 0.000001 | 0.025915 | 0.006577 |
| length[85]  | 0.009002 | 0.000075 | 0.000003 | 0.026362 | 0.006414 |
| length[86]  | 0.029110 | 0.000371 | 0.000494 | 0.068445 | 0.026299 |
| length[87]  | 0.009116 | 0.000079 | 0.000049 | 0.026989 | 0.005927 |
| length[88]  | 0.023412 | 0.000251 | 0.000283 | 0.054809 | 0.020612 |
| length[89]  | 0.007789 | 0.000060 | 0.000021 | 0.023030 | 0.005276 |
| length[90]  | 0.015092 | 0.000146 | 0.000003 | 0.038309 | 0.012185 |
| length[91]  | 0.023236 | 0.000406 | 0.000002 | 0.062712 | 0.017451 |
| length[92]  | 0.008634 | 0.000075 | 0.000000 | 0.025915 | 0.005878 |
| length[93]  | 0.020249 | 0.000229 | 0.000009 | 0.047593 | 0.018242 |
| length[94]  | 0.019433 | 0.000179 | 0.000040 | 0.043558 | 0.016450 |
| length[95]  | 0.016932 | 0.000306 | 0.000007 | 0.052635 | 0.011106 |
| length[96]  | 0.015610 | 0.000196 | 0.000037 | 0.041176 | 0.011961 |
| length[97]  | 0.022687 | 0.000262 | 0.000148 | 0.051975 | 0.020971 |
| length[98]  | 0.018785 | 0.000250 | 0.000009 | 0.050099 | 0.014486 |
| length[99]  | 0.006943 | 0.000049 | 0.000004 | 0.020906 | 0.004536 |
| length[100] | 0.008817 | 0.000100 | 0.000012 | 0.027927 | 0.005339 |

|             |          |          |          |          |          |
|-------------|----------|----------|----------|----------|----------|
| length[101] | 0.024428 | 0.000449 | 0.000030 | 0.068631 | 0.019036 |
| length[102] | 0.036297 | 0.000401 | 0.003337 | 0.072715 | 0.033933 |
| length[103] | 0.007381 | 0.000047 | 0.000007 | 0.019778 | 0.005420 |
| length[104] | 0.014441 | 0.000138 | 0.000051 | 0.037904 | 0.011421 |
| length[105] | 0.025124 | 0.000476 | 0.000088 | 0.069624 | 0.018548 |
| length[106] | 0.019591 | 0.000169 | 0.000150 | 0.041711 | 0.017566 |
| length[107] | 0.022613 | 0.000316 | 0.000063 | 0.057674 | 0.018731 |
| length[108] | 0.009497 | 0.000069 | 0.000011 | 0.026328 | 0.007257 |
| length[109] | 0.010402 | 0.000117 | 0.000011 | 0.027493 | 0.007713 |
| length[110] | 0.024203 | 0.000335 | 0.000080 | 0.058589 | 0.021363 |
| length[111] | 0.020345 | 0.000327 | 0.000053 | 0.051040 | 0.015072 |
| height[0]   | 0.175506 | 0.001777 | 0.067404 | 0.244953 | 0.179710 |
| height[1]   | 0.000000 | 0.000000 | 0.000000 | 0.000000 | 0.000000 |
| height[2]   | 0.000000 | 0.000000 | 0.000000 | 0.000000 | 0.000000 |
| height[3]   | 0.000000 | 0.000000 | 0.000000 | 0.000000 | 0.000000 |
| height[4]   | 0.000000 | 0.000000 | 0.000000 | 0.000000 | 0.000000 |
| height[5]   | 0.000000 | 0.000000 | 0.000000 | 0.000000 | 0.000000 |
| height[6]   | 0.000000 | 0.000000 | 0.000000 | 0.000000 | 0.000000 |
| height[7]   | 0.000000 | 0.000000 | 0.000000 | 0.000000 | 0.000000 |
| height[8]   | 0.000000 | 0.000000 | 0.000000 | 0.000000 | 0.000000 |
| height[9]   | 0.000000 | 0.000000 | 0.000000 | 0.000000 | 0.000000 |
| height[10]  | 0.000000 | 0.000000 | 0.000000 | 0.000000 | 0.000000 |
| height[11]  | 0.000000 | 0.000000 | 0.000000 | 0.000000 | 0.000000 |
| height[12]  | 0.000000 | 0.000000 | 0.000000 | 0.000000 | 0.000000 |
| height[13]  | 0.000000 | 0.000000 | 0.000000 | 0.000000 | 0.000000 |
| height[14]  | 0.000000 | 0.000000 | 0.000000 | 0.000000 | 0.000000 |
| height[15]  | 0.000000 | 0.000000 | 0.000000 | 0.000000 | 0.000000 |
| height[16]  | 0.000000 | 0.000000 | 0.000000 | 0.000000 | 0.000000 |
| height[17]  | 0.000000 | 0.000000 | 0.000000 | 0.000000 | 0.000000 |
| height[18]  | 0.000000 | 0.000000 | 0.000000 | 0.000000 | 0.000000 |
| height[19]  | 0.000000 | 0.000000 | 0.000000 | 0.000000 | 0.000000 |
| height[20]  | 0.000000 | 0.000000 | 0.000000 | 0.000000 | 0.000000 |
| height[21]  | 0.000000 | 0.000000 | 0.000000 | 0.000000 | 0.000000 |
| height[22]  | 0.000000 | 0.000000 | 0.000000 | 0.000000 | 0.000000 |
| height[23]  | 0.000000 | 0.000000 | 0.000000 | 0.000000 | 0.000000 |
| height[24]  | 0.000000 | 0.000000 | 0.000000 | 0.000000 | 0.000000 |
| height[25]  | 0.000000 | 0.000000 | 0.000000 | 0.000000 | 0.000000 |
| height[26]  | 0.000000 | 0.000000 | 0.000000 | 0.000000 | 0.000000 |
| height[27]  | 0.000000 | 0.000000 | 0.000000 | 0.000000 | 0.000000 |
| height[28]  | 0.000000 | 0.000000 | 0.000000 | 0.000000 | 0.000000 |
| height[29]  | 0.000000 | 0.000000 | 0.000000 | 0.000000 | 0.000000 |
| height[30]  | 0.000000 | 0.000000 | 0.000000 | 0.000000 | 0.000000 |
| height[31]  | 0.000000 | 0.000000 | 0.000000 | 0.000000 | 0.000000 |
| height[32]  | 0.000000 | 0.000000 | 0.000000 | 0.000000 | 0.000000 |
| height[33]  | 0.000000 | 0.000000 | 0.000000 | 0.000000 | 0.000000 |
| height[34]  | 0.000000 | 0.000000 | 0.000000 | 0.000000 | 0.000000 |
| height[35]  | 0.000000 | 0.000000 | 0.000000 | 0.000000 | 0.000000 |
| height[36]  | 0.000000 | 0.000000 | 0.000000 | 0.000000 | 0.000000 |
| height[37]  | 0.000000 | 0.000000 | 0.000000 | 0.000000 | 0.000000 |
| height[38]  | 0.000000 | 0.000000 | 0.000000 | 0.000000 | 0.000000 |
| height[39]  | 0.005598 | 0.000036 | 0.000001 | 0.017581 | 0.003782 |
| height[40]  | 0.070546 | 0.000521 | 0.024824 | 0.113309 | 0.069506 |
| height[41]  | 0.096035 | 0.001063 | 0.033078 | 0.157832 | 0.093395 |
| height[42]  | 0.035063 | 0.000237 | 0.008716 | 0.064776 | 0.032826 |
| height[43]  | 0.041080 | 0.000306 | 0.009227 | 0.074904 | 0.039126 |
| height[44]  | 0.030106 | 0.000142 | 0.009682 | 0.053512 | 0.028861 |
| height[45]  | 0.096388 | 0.000895 | 0.037071 | 0.156540 | 0.095968 |
| height[46]  | 0.051984 | 0.000392 | 0.016107 | 0.090249 | 0.050045 |
| height[47]  | 0.046539 | 0.000264 | 0.016012 | 0.077386 | 0.045258 |
| height[48]  | 0.073894 | 0.000498 | 0.026705 | 0.113156 | 0.074036 |
| height[49]  | 0.015475 | 0.000080 | 0.002167 | 0.033140 | 0.013926 |

|             |          |          |          |          |          |
|-------------|----------|----------|----------|----------|----------|
| height[50]  | 0.070000 | 0.000330 | 0.027764 | 0.103749 | 0.070663 |
| height[51]  | 0.030955 | 0.000176 | 0.007243 | 0.056265 | 0.029637 |
| height[52]  | 0.006166 | 0.000036 | 0.000007 | 0.017729 | 0.004427 |
| height[53]  | 0.030665 | 0.000207 | 0.003762 | 0.056070 | 0.028766 |
| height[54]  | 0.033764 | 0.000227 | 0.007979 | 0.063297 | 0.031969 |
| height[55]  | 0.058786 | 0.000279 | 0.022270 | 0.089275 | 0.059107 |
| height[56]  | 0.098171 | 0.000887 | 0.035942 | 0.154210 | 0.097524 |
| height[57]  | 0.043263 | 0.000193 | 0.014805 | 0.068307 | 0.042165 |
| height[58]  | 0.023407 | 0.000131 | 0.004829 | 0.045259 | 0.021514 |
| height[59]  | 0.097420 | 0.000529 | 0.037773 | 0.139202 | 0.098567 |
| height[60]  | 0.031387 | 0.000173 | 0.008406 | 0.056079 | 0.030108 |
| height[61]  | 0.072485 | 0.000733 | 0.023187 | 0.125389 | 0.070613 |
| height[62]  | 0.075607 | 0.000766 | 0.020701 | 0.127181 | 0.073541 |
| height[63]  | 0.074016 | 0.000662 | 0.026871 | 0.128030 | 0.072219 |
| height[64]  | 0.081000 | 0.000752 | 0.027597 | 0.136047 | 0.079122 |
| height[65]  | 0.075536 | 0.000634 | 0.022272 | 0.119883 | 0.074744 |
| height[66]  | 0.141550 | 0.001380 | 0.054439 | 0.205282 | 0.142910 |
| height[67]  | 0.044331 | 0.000337 | 0.009929 | 0.079042 | 0.043348 |
| height[68]  | 0.024403 | 0.000171 | 0.004083 | 0.050417 | 0.022120 |
| height[69]  | 0.042589 | 0.000299 | 0.012988 | 0.076899 | 0.040856 |
| height[70]  | 0.149513 | 0.000992 | 0.073298 | 0.206985 | 0.153690 |
| height[71]  | 0.049354 | 0.000325 | 0.011570 | 0.080186 | 0.048637 |
| height[72]  | 0.084253 | 0.000612 | 0.035427 | 0.127244 | 0.086878 |
| height[73]  | 0.086946 | 0.000783 | 0.028589 | 0.138012 | 0.086898 |
| height[74]  | 0.174625 | 0.001496 | 0.076570 | 0.236859 | 0.180371 |
| height[75]  | 0.038617 | 0.000255 | 0.011002 | 0.067744 | 0.037385 |
| height[76]  | 0.070196 | 0.000515 | 0.022996 | 0.109591 | 0.069875 |
| height[77]  | 0.034571 | 0.000238 | 0.008066 | 0.065436 | 0.032796 |
| height[78]  | 0.162191 | 0.001329 | 0.062813 | 0.216334 | 0.167387 |
| height[79]  | 0.047557 | 0.000220 | 0.016148 | 0.073427 | 0.046565 |
| height[80]  | 0.133679 | 0.000891 | 0.069927 | 0.188526 | 0.134690 |
| height[81]  | 0.138111 | 0.001124 | 0.056916 | 0.190241 | 0.140454 |
| height[82]  | 0.059711 | 0.000350 | 0.022364 | 0.098649 | 0.059525 |
| height[83]  | 0.052639 | 0.000335 | 0.019845 | 0.087214 | 0.051678 |
| height[84]  | 0.008796 | 0.000039 | 0.000154 | 0.020835 | 0.007537 |
| height[85]  | 0.038442 | 0.000192 | 0.013523 | 0.063719 | 0.036791 |
| height[86]  | 0.098362 | 0.000769 | 0.038239 | 0.147950 | 0.096122 |
| height[87]  | 0.039674 | 0.000197 | 0.011878 | 0.065341 | 0.039156 |
| height[88]  | 0.121085 | 0.000770 | 0.065843 | 0.180370 | 0.121971 |
| height[89]  | 0.009257 | 0.000044 | 0.000295 | 0.021205 | 0.007762 |
| height[90]  | 0.047547 | 0.000326 | 0.014852 | 0.081660 | 0.045284 |
| height[91]  | 0.092107 | 0.000818 | 0.039431 | 0.146440 | 0.091431 |
| height[92]  | 0.054643 | 0.000244 | 0.021972 | 0.081453 | 0.053921 |
| height[93]  | 0.062018 | 0.000377 | 0.025389 | 0.097117 | 0.062810 |
| height[94]  | 0.124813 | 0.000792 | 0.047915 | 0.172920 | 0.125033 |
| height[95]  | 0.075601 | 0.000718 | 0.020908 | 0.120488 | 0.076288 |
| height[96]  | 0.059064 | 0.000381 | 0.021210 | 0.093331 | 0.058259 |
| height[97]  | 0.130981 | 0.001107 | 0.068152 | 0.192161 | 0.132690 |
| height[98]  | 0.106012 | 0.000990 | 0.045389 | 0.161259 | 0.108178 |
| height[99]  | 0.023756 | 0.000113 | 0.008362 | 0.045296 | 0.023040 |
| height[100] | 0.028709 | 0.000189 | 0.006840 | 0.054340 | 0.026400 |
| height[101] | 0.084943 | 0.000930 | 0.032067 | 0.140022 | 0.083032 |
| height[102] | 0.089364 | 0.000455 | 0.041786 | 0.126451 | 0.089983 |
| height[103] | 0.051298 | 0.000251 | 0.018781 | 0.080930 | 0.050855 |
| height[104] | 0.165373 | 0.001252 | 0.062379 | 0.218460 | 0.169097 |
| height[105] | 0.084173 | 0.000898 | 0.034226 | 0.148660 | 0.080961 |
| height[106] | 0.029997 | 0.000197 | 0.004478 | 0.052793 | 0.029039 |
| height[107] | 0.097259 | 0.000838 | 0.048826 | 0.158514 | 0.095729 |
| height[108] | 0.160286 | 0.001221 | 0.073906 | 0.218610 | 0.164361 |
| height[109] | 0.041097 | 0.000283 | 0.010404 | 0.071341 | 0.039817 |
| height[110] | 0.096661 | 0.000990 | 0.031982 | 0.147012 | 0.097060 |







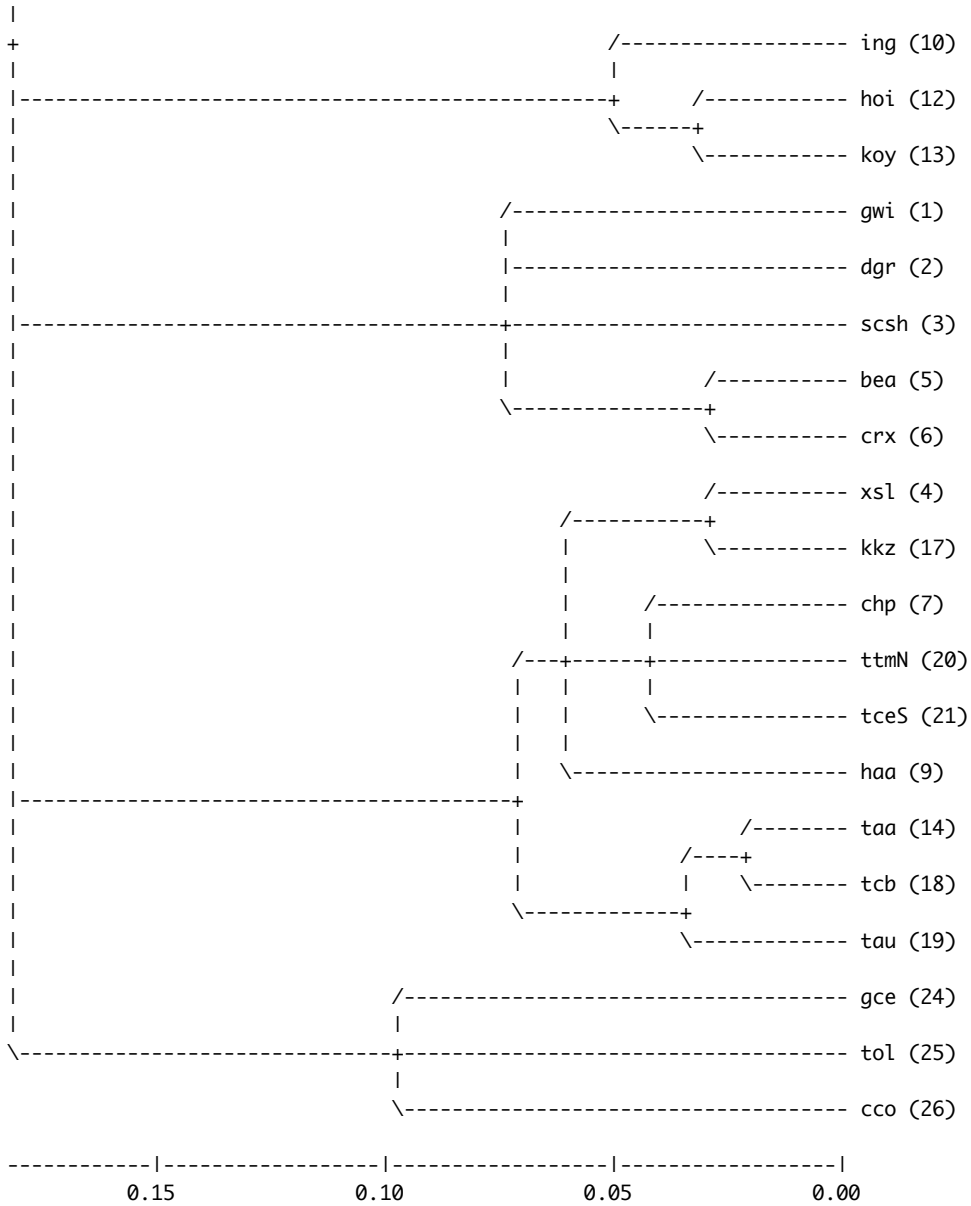

[Expected changes per site]

Calculating tree probabilities...

Credible sets of trees (3001 trees sampled):

- 50 % credible set contains 1501 trees
- 90 % credible set contains 2701 trees
- 95 % credible set contains 2851 trees
- 99 % credible set contains 2971 trees

MrBayes v3.2.1 x64

(Bayesian Analysis of Phylogeny)

Distributed under the GNU General Public License

Type "help" or "help <command>" for information  
on the commands that are available.

Type "about" for authorship and general  
information about the program.

MrBayes > exe /Users/msicoli/Yeniseian-NaDene-Typ\_noHAXNoEYA.nex

Executing file "/Users/msicoli/Yeniseian-NaDene-Typ\_noHAXNoEYA.nex"

UNIX line termination

Longest line length = 123

Parsing file

Expecting NEXUS formatted file

Reading data block

Allocated taxon set

Allocated matrix

Defining new matrix with 38 taxa and 116 characters

Data is Standard

Missing data coded as ?

Gaps coded as -

Data matrix is not interleaved

Taxon 1 -> gwi

Taxon 2 -> dgr

Taxon 3 -> scsh

Taxon 4 -> xsl

Taxon 5 -> bea

Taxon 6 -> crx

Taxon 7 -> chp

Taxon 8 -> txc

Taxon 9 -> haa

Taxon 10 -> ing

Taxon 11 -> kuu

Taxon 12 -> hoi

Taxon 13 -> koy

Taxon 14 -> taa

Taxon 15 -> aht

Taxon 16 -> tfn

Taxon 17 -> kkz

Taxon 18 -> tcb

Taxon 19 -> tau

Taxon 20 -> ttmN

Taxon 21 -> tceS

Taxon 22 -> tli

Taxon 23 -> gce

Taxon 24 -> tol

Taxon 25 -> cco

Taxon 26 -> hup

Taxon 27 -> mtl

Taxon 28 -> wlk

Taxon 29 -> kto

Taxon 30 -> apc

Taxon 31 -> apw

Taxon 32 -> apj

Taxon 33 -> nav

Taxon 34 -> apk

Taxon 35 -> apl

```
Taxon 36 -> srs
Taxon 37 -> ket
Taxon 38 -> zko
Successfully read matrix
Setting default partition (does not divide up characters)
Setting model defaults
Seed (for generating default start values) = 1388169385
Adding dummy characters (unobserved site patterns) for division 1
WARNING: There are 32 characters incompatible with the specified
        coding bias. These characters will be excluded.
Setting output file names to "/Users/msicoli/Yeniseian-NaDene-Typ_noHAXNoEYA.nex.run<i>.<plt>"
Exiting data block
Reached end of file
```

```
MrBayes > lset nst=6 rates=gamma
```

```
Setting Rates to Gamma
Successfully set likelihood model parameters
Adding dummy characters (unobserved site patterns) for division 1
WARNING: There are 32 characters incompatible with the specified
        coding bias. These characters will be excluded.
```

```
MrBayes > prset brlenspr=clock:uniform
```

```
Setting Brlenspr to Clock:Uniform
Successfully set prior model parameters
Adding dummy characters (unobserved site patterns) for division 1
WARNING: There are 32 characters incompatible with the specified
        coding bias. These characters will be excluded.
```

```
MrBayes > mcmc ngen=2000000 printfreq=10000 samplefreq=500 nruns=1 nchains=4 savebrlens=yes
filename=DY-27Dec-strict-H-EOut
```

```
Setting number of generations to 2000000
Setting print frequency to 10000
Setting sample frequency to 500
Setting number of runs to 1
Setting number of chains to 4
Setting chain output file names to "DY-27Dec-strict-H-EOut.<p/>"
Successfully set chain parameters
```

```
MrBayes > mcmc
```

```
Running Markov chain
MCMC stamp = 3445309595
Seed = 583554439
Swapseed = 1388169385
Model settings:
```

```
Data not partitioned --
  Datatype = Standard
  Coding    = Variable
  # States  = Variable, up to 10
             State frequencies are fixed to be equal
  Rates     = Gamma
             Gamma shape parameter is uniformly distributed on the interval (0.00,200.00).
             Gamma distribution is approximated using 4 categories.
             Likelihood summarized over all rate categories in each generation.
```

```
Active parameters:
```

```
Parameters
-----
Statefreq      1
```

Shape 2  
Ratemultiplier 3  
Topology 4  
Brlens 5  
Clockrate 6  
-----

- 1 -- Parameter = Alpha\_symdir  
Type = Symmetric dirichlet/beta distribution alpha\_i parameter  
Prior = Symmetric dirichlet with fixed(-1.00) variance parameter
- 2 -- Parameter = Alpha  
Type = Shape of scaled gamma distribution of site rates  
Prior = Uniform(0.00,200.00)
- 3 -- Parameter = Ratemultiplier  
Type = Partition-specific rate multiplier  
Prior = Fixed(1.0)
- 4 -- Parameter = Tau  
Type = Topology  
Prior = All topologies equally probable a priori  
Subparam. = V
- 5 -- Parameter = V  
Type = Branch lengths  
Prior = Clock:Uniform  
Tree age has an Exponential(1.000) distribution  
Node ages are not constrained
- 6 -- Parameter = Clockrate  
Type = Base rate of clock  
Prior = Fixed(1.000000)  
The clock rate is constant (strict clock)

Number of taxa = 38  
Number of characters = 116

The MCMC sampler will use the following moves:

With prob. Chain will use move  
2.38 % Multiplier(Alpha)  
11.90 % ExtSprClock(Tau,V)  
23.81 % NNIClock(Tau,V)  
11.90 % ParsSPRClock(Tau,V)  
47.62 % NodesliderClock(V)  
2.38 % TreeStretch(V)

Division 1 has 77 unique site patterns  
Initializing conditional likelihoods  
Using standard non-SSE likelihood calculator for division 1 (single-precision)

Initial log likelihoods and log prior probs:

Chain 1 -- -1529.584402 -- -87.230988  
Chain 2 -- -1536.001745 -- -87.230988  
Chain 3 -- -1493.848213 -- -87.230988  
Chain 4 -- -1568.572229 -- -87.230988

Chain results (2000000 generations requested):

0 -- [-1529.584] (-1536.002) (-1493.848) (-1568.572)

[OMITTED GENERATIONS]

2000000 -- (-915.505) (-930.645) [-921.682] (-928.871) -- 0:00:00

Continue with analysis? (yes/no): n

Analysis completed in 16 mins 36 seconds  
Analysis used 951.77 seconds of CPU time  
Log likelihood of best state for "cold" chain was -893.59

Acceptance rates for the moves in the "cold" chain:  
With prob. (last 100) chain accepted proposals by move  
38.2 % ( 25 %) Multiplier(Alpha)  
19.3 % ( 27 %) ExtSprClock(Tau,V)  
45.0 % ( 43 %) NNIClock(Tau,V)  
15.4 % ( 17 %) ParsSPRClock(Tau,V)  
70.4 % ( 71 %) NodesliderClock(V)  
71.2 % ( 26 %) TreeStretch(V)

Chain swap information:

|   | 1      | 2      | 3      | 4    |
|---|--------|--------|--------|------|
| 1 |        | 0.53   | 0.26   | 0.11 |
| 2 | 334295 |        | 0.60   | 0.33 |
| 3 | 332184 | 333798 |        | 0.64 |
| 4 | 332815 | 334284 | 332624 |      |

Upper diagonal: Proportion of successful state exchanges between chains  
Lower diagonal: Number of attempted state exchanges between chains

Chain information:

ID -- Heat  
-----  
1 -- 1.00 (cold chain)  
2 -- 0.91  
3 -- 0.83  
4 -- 0.77

Heat = 1 / (1 + T \* (ID - 1))  
(where T = 0.10 is the temperature and ID is the chain number)

MrBayes > sumt relburnin=yes

Using relative burnin (a fraction of samples discarded).  
Summarizing trees in file "DY-27Dec-strict-H-EOut.t"  
Using relative burnin ('relburnin=yes'), discarding the first 25 % of sampled trees  
Writing statistics to files DY-27Dec-strict-H-EOut.<parts|tstat|vstat|trprobs|con>  
Examining file ...  
Found one tree block in file "DY-27Dec-strict-H-EOut.t" with 4001 trees in last block

Tree reading status:

0 10 20 30 40 50 60 70 80 90 100  
v-----v-----v-----v-----v-----v-----v-----v-----v-----v-----v  
\*\*\*\*\*

Read 4001 trees from last tree block (sampling 3001 of them)

General explanation:

In an unrooted tree, a taxon bipartition (split) is specified by removing a branch, thereby dividing the species into those to the left and those to the right of the branch. Here, taxa to one side of the removed branch are denoted '.' and those to the other side are denoted '\*'. Specifically, the '.' symbol





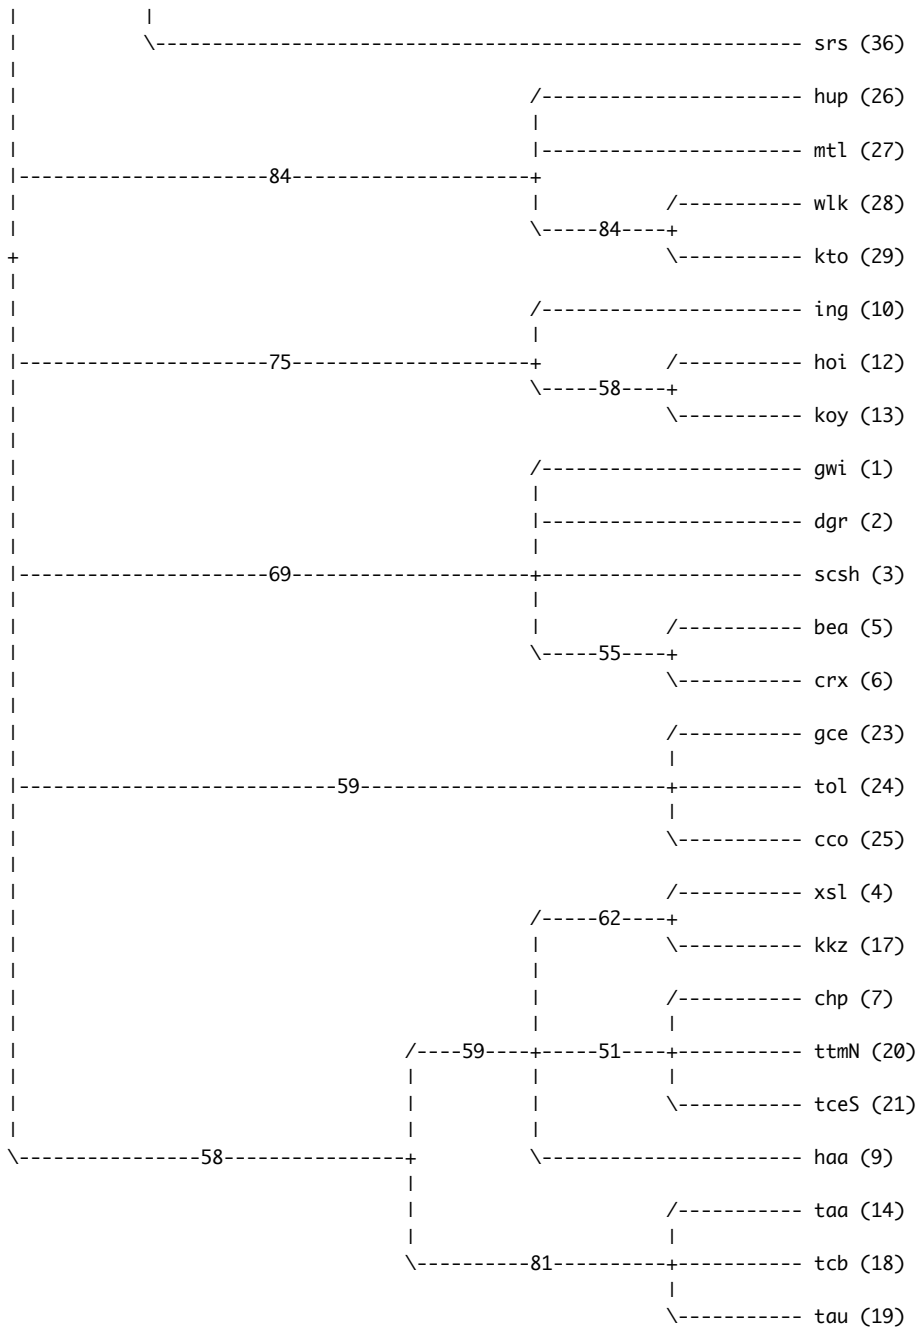

Phylogram (based on median node depths):

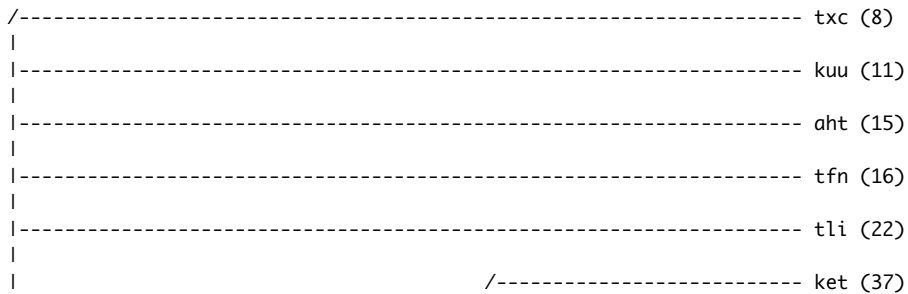

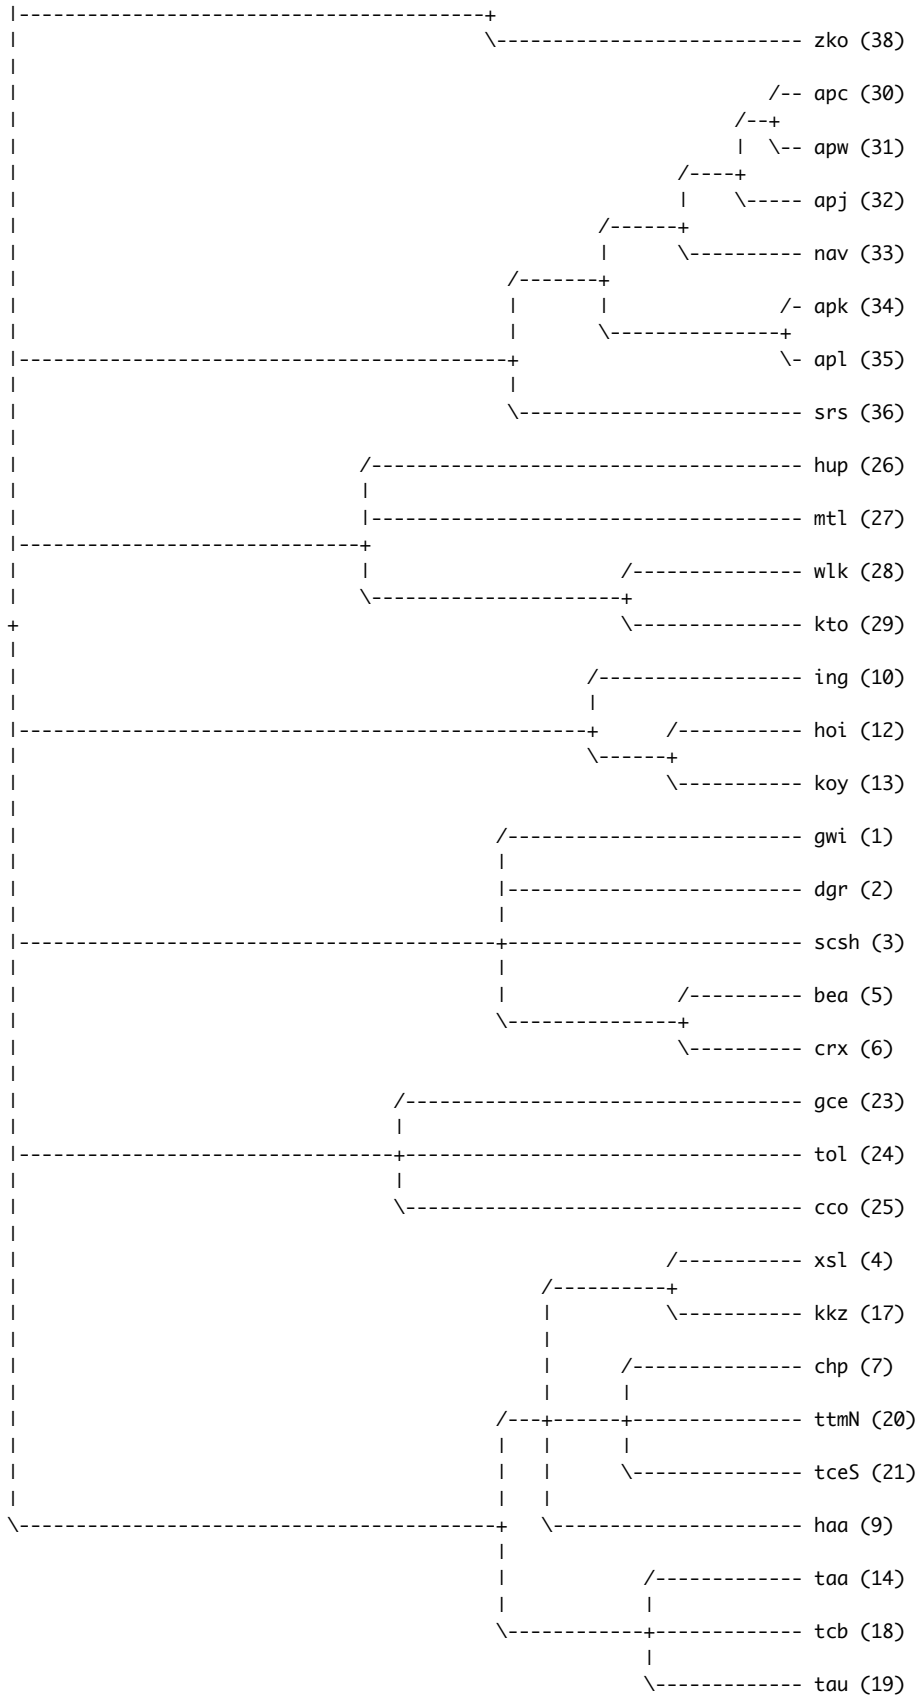

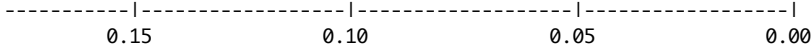

[Expected changes per site]

Calculating tree probabilities...

Credible sets of trees (3001 trees sampled):

- 50 % credible set contains 1501 trees
- 90 % credible set contains 2701 trees
- 95 % credible set contains 2851 trees
- 99 % credible set contains 2971 trees

MrBayes > sump relburnin=yes

Using relative burnin (a fraction of samples discarded).  
 Summarizing parameters in file DY-27Dec-strict-H-EOut.p  
 Writing summary statistics to file DY-27Dec-strict-H-EOut.pstat  
 Using relative burnin ('relburnin=yes'), discarding the first 25 % of samples

Below is a rough plot of the generation (x-axis) versus the log probability of observing the data (y-axis). You can use this graph to determine what the burn in for your analysis should be. When the log probability starts to plateau you may be at stationarity. Sample trees and parameters after the log probability plateaus. Of course, this is not a guarantee that you are at stationarity. When possible, run multiple analyses starting from different random trees; if the inferences you make for independent analyses are the same, this is reasonable evidence that the chains have converged. You can use MrBayes to run several independent analyses simultaneously. During such a run, MrBayes will monitor the convergence of topologies. After the run has been completed, the 'sumt' and 'sump' functions will provide additional convergence diagnostics for all the parameters in your model. Remember that the burn in is the number of samples to discard. There are a total of ngen / samplefreq samples taken during a MCMC analysis.

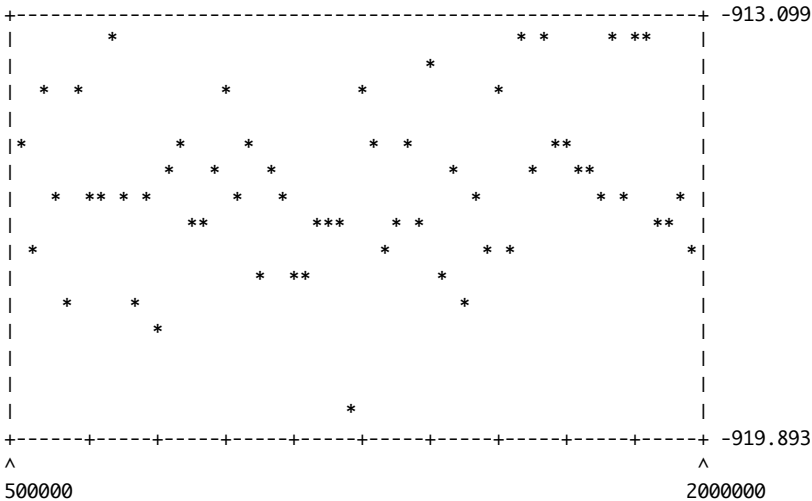

Estimated marginal likelihoods for run sampled in file "DY-27Dec-strict-H-EOut.p":  
 (Use the harmonic mean for Bayes factor comparisons of models)  
 (Values are saved to the file /Users/msicoli/Yeniseian-NaDene-Typ\_noHAXNoEYA.nex.lstat)

Arithmetic mean    Harmonic mean

-----  
 -904.06            -935.45  
 -----

Model parameter summaries for run sampled in file "DY-27Dec-strict-H-E0out":  
 Based on a total of 3001 samples out of a total of 4001 samples  
 from this analysis.  
 Parameter summaries saved to file "/Users/msicoli/Yeniseian-NaDene-Typ\_noHAXNoEYA.nex.pstat".

| Parameter | Mean     | Variance   | 95% HPD Interval |          | Median   | ESS*    |
|-----------|----------|------------|------------------|----------|----------|---------|
|           |          |            | Lower            | Upper    |          |         |
| TH        | 0.175288 | 0.001509   | 0.086786         | 0.243660 | 0.176903 | 435.06  |
| TL        | 2.788269 | 0.305848   | 1.474125         | 3.694101 | 2.854921 | 399.02  |
| alpha     | 4.785785 | 305.551597 | 0.162164         | 9.106779 | 1.576508 | 2663.77 |

\* Convergence diagnostic (ESS = Estimated Sample Size); ESS value  
 below 100 may indicate that the parameter is undersampled.
